# Supplementary material for: Optimising sampling of fish assemblages on intertidal reefs using remote underwater video
Source: PeerJ. 2023 May 22;11:e15426. doi: 10.7717/peerj.15426 (PMC10211360; doi:10.7717/peerj.15426)
Supplement: Supplemental Information 1 [file peerj-11-15426-s001.xlsx]

## Sheet: GP6F_1
Seconds	Minutes	Omobranchus anolius	Ambassis	Acanthopagrus australis	Girella tricuspidata	Tylosurus gavialoides	Rhabdosargus sarba	Omobranchus	Sillago ciliata
590	9.83333	3	250	0	0	0	0	0	0
591	9.85	3	250	0	0	0	0	0	0
592	9.86667	3	250	0	0	0	0	0	0
593	9.88333	2	250	0	0	0	0	0	0
594	9.9	2	250	0	0	0	0	0	0
595	9.91667	2	250	0	0	0	0	0	0
596	9.93333	1	250	0	0	0	0	0	0
597	9.95	1	250	0	0	0	0	0	0
598	9.96667	1	250	0	0	0	0	0	0
599	9.98333	1	250	0	0	0	0	0	0
600	10	1	250	0	0	0	0	0	0
601	10.0167	1	250	0	0	0	0	0	0
602	10.0333	1	250	0	0	0	0	0	0
603	10.05	1	250	0	0	0	0	0	0
604	10.0667	1	250	0	0	0	0	0	0
605	10.0833	1	250	0	0	0	0	0	0
606	10.1	1	250	0	0	0	0	0	0
607	10.1167	1	250	0	0	0	0	0	0
608	10.1333	1	250	0	0	0	0	0	0
609	10.15	1	250	0	0	0	0	0	0
610	10.1667	1	250	0	0	0	0	0	0
611	10.1833	1	250	0	0	0	0	0	0
612	10.2	1	250	0	0	0	0	0	0
613	10.2167	1	250	0	0	0	0	0	0
614	10.2333	1	250	0	0	0	0	0	0
615	10.25	1	250	0	0	0	0	0	0
616	10.2667	1	300	0	0	0	0	0	0
617	10.2833	1	300	0	0	0	0	0	0
618	10.3	1	300	0	0	0	0	0	0
619	10.3167	2	300	0	0	0	0	0	0
620	10.3333	2	300	0	0	0	0	0	0
621	10.35	2	300	0	0	0	0	0	0
622	10.3667	2	300	0	0	0	0	0	0
623	10.3833	2	300	0	0	0	0	0	0
624	10.4	2	300	0	0	0	0	0	0
625	10.4167	2	300	0	0	0	0	0	0
626	10.4333	2	300	0	0	0	0	0	0
627	10.45	2	300	0	0	0	0	0	0
628	10.4667	2	300	0	0	0	0	0	0
629	10.4833	2	300	0	0	0	0	0	0
630	10.5	2	300	0	0	0	0	0	0
631	10.5167	2	300	0	0	0	0	0	0
632	10.5333	3	300	0	0	0	0	0	0
633	10.55	3	300	0	0	0	0	0	0
634	10.5667	3	300	0	0	0	0	0	0
635	10.5833	3	300	0	0	0	0	0	0
636	10.6	2	300	0	0	0	0	0	0
637	10.6167	2	300	0	0	0	0	0	0
638	10.6333	2	300	0	0	0	0	0	0
639	10.65	2	300	0	0	0	0	0	0
640	10.6667	2	300	0	0	0	0	0	0
641	10.6833	2	300	0	0	0	0	0	0
642	10.7	2	250	0	0	0	0	0	0
643	10.7167	2	250	0	0	0	0	0	0
644	10.7333	2	250	0	0	0	0	0	0
645	10.75	2	250	0	0	0	0	0	0
646	10.7667	2	250	0	0	0	0	0	0
647	10.7833	2	250	0	0	0	0	0	0
648	10.8	2	250	0	0	0	0	0	0
649	10.8167	2	250	0	0	0	0	0	0
650	10.8333	2	250	0	0	0	0	0	0
651	10.85	2	250	0	0	0	0	0	0
652	10.8667	2	250	0	0	0	0	0	0
653	10.8833	2	250	0	0	0	0	0	0
654	10.9	2	250	0	0	0	0	0	0
655	10.9167	2	250	0	0	0	0	0	0
656	10.9333	2	250	0	0	0	0	0	0
657	10.95	2	250	0	0	0	0	0	0
658	10.9667	2	250	0	0	0	0	0	0
659	10.9833	2	250	0	0	0	0	0	0
660	11	1	250	0	0	0	0	0	0
661	11.0167	1	250	0	0	0	0	0	0
662	11.0333	1	250	0	0	0	0	0	0
663	11.05	1	250	0	0	0	0	0	0
664	11.0667	1	250	0	0	0	0	0	0
665	11.0833	1	250	0	0	0	0	0	0
666	11.1	1	250	0	0	0	0	0	0
667	11.1167	2	250	3	0	0	0	0	0
668	11.1333	2	300	3	0	0	0	0	0
669	11.15	2	300	3	0	0	0	0	0
670	11.1667	2	300	3	0	0	0	0	0
671	11.1833	2	300	3	0	0	0	0	0
672	11.2	2	300	3	0	0	0	0	0
673	11.2167	2	300	3	0	0	0	0	0
674	11.2333	2	300	3	0	0	0	0	0
675	11.25	2	300	3	0	0	0	0	0
676	11.2667	2	300	3	1	1	0	0	0
677	11.2833	2	300	3	1	1	0	0	0
678	11.3	2	300	3	1	1	0	0	0
679	11.3167	2	300	3	1	1	0	0	0
680	11.3333	2	300	0	1	1	0	0	0
681	11.35	2	300	0	1	0	0	0	0
682	11.3667	2	300	0	0	1	0	0	0
683	11.3833	2	300	0	0	1	0	0	0
684	11.4	2	300	0	0	1	0	0	0
685	11.4167	2	300	0	0	1	0	0	0
686	11.4333	2	300	0	0	1	0	0	0
687	11.45	2	300	0	0	1	0	0	0
688	11.4667	2	300	0	0	1	0	0	0
689	11.4833	2	300	0	0	1	0	0	0
690	11.5	2	300	0	0	1	0	0	0
691	11.5167	0	300	0	0	1	0	0	0
692	11.5333	0	300	0	0	1	0	0	0
693	11.55	0	300	0	0	1	0	0	0
694	11.5667	0	204	0	0	0	0	0	0
695	11.5833	0	204	0	0	2	0	0	0
696	11.6	0	204	0	0	2	0	0	0
697	11.6167	0	204	0	0	1	0	0	0
698	11.6333	0	204	0	0	1	0	0	0
699	11.65	0	204	0	0	1	0	0	0
700	11.6667	0	204	0	0	1	0	0	0
701	11.6833	0	204	0	0	1	0	0	0
702	11.7	0	204	0	0	1	0	0	0
703	11.7167	0	204	0	0	1	0	0	0
704	11.7333	1	204	0	0	1	0	0	0
705	11.75	1	204	0	0	0	0	0	0
706	11.7667	0	204	0	0	0	0	0	0
707	11.7833	0	204	1	0	0	0	0	0
708	11.8	0	204	1	0	0	0	0	0
709	11.8167	0	204	1	0	0	0	0	0
710	11.8333	0	204	1	0	0	0	0	0
711	11.85	0	204	1	0	0	0	0	0
712	11.8667	0	204	0	0	0	0	0	0
713	11.8833	0	204	0	0	1	0	0	0
714	11.9	0	204	0	0	1	0	0	0
715	11.9167	0	204	0	0	1	0	0	0
716	11.9333	0	204	0	0	1	0	0	0
717	11.95	0	204	0	0	0	0	0	0
718	11.9667	1	204	0	0	0	0	0	0
719	11.9833	1	204	0	0	0	0	0	0
720	12	1	0	0	0	0	0	0	0
721	12.0167	1	0	0	0	0	0	0	0
722	12.0333	1	0	0	0	0	0	0	0
723	12.05	1	0	0	0	0	0	0	0
724	12.0667	1	0	0	0	0	0	0	0
725	12.0833	1	0	0	0	0	0	0	0
726	12.1	1	0	0	0	0	0	0	0
727	12.1167	1	0	0	0	0	0	0	0
728	12.1333	1	0	0	0	0	0	0	0
729	12.15	1	0	0	0	0	0	0	0
730	12.1667	1	0	0	0	0	0	0	0
731	12.1833	1	0	0	0	0	0	0	0
732	12.2	1	0	0	0	0	0	0	0
733	12.2167	1	0	0	0	0	0	0	0
734	12.2333	1	0	0	0	0	0	0	0
735	12.25	1	0	0	0	0	0	0	0
736	12.2667	1	0	0	0	0	0	0	0
737	12.2833	1	0	0	0	0	0	0	0
738	12.3	1	0	0	0	0	0	0	0
739	12.3167	2	0	0	0	0	0	0	0
740	12.3333	3	0	0	0	0	0	0	0
741	12.35	3	0	0	0	0	0	0	0
742	12.3667	3	0	1	0	0	0	0	0
743	12.3833	3	0	1	0	0	0	0	0
744	12.4	3	0	1	0	0	0	0	0
745	12.4167	3	0	1	0	0	0	0	0
746	12.4333	2	0	1	0	0	0	0	0
747	12.45	2	0	1	0	0	0	0	0
748	12.4667	2	0	1	0	0	0	0	0
749	12.4833	2	0	1	0	0	0	0	0
750	12.5	2	0	1	0	0	0	0	0
751	12.5167	2	0	1	0	0	0	0	0
752	12.5333	2	0	1	0	0	0	0	0
753	12.55	2	0	1	0	0	0	0	0
754	12.5667	3	0	2	0	0	0	0	0
755	12.5833	3	0	1	0	0	0	0	0
756	12.6	2	0	1	0	0	0	0	0
757	12.6167	2	0	5	0	0	0	0	0
758	12.6333	2	0	5	0	0	0	0	0
759	12.65	2	0	5	0	0	0	0	0
760	12.6667	2	0	5	0	0	0	0	0
761	12.6833	2	0	0	0	0	0	0	0
762	12.7	2	0	4	0	0	0	0	0
763	12.7167	2	0	4	0	0	0	0	0
764	12.7333	2	0	4	0	0	0	0	0
765	12.75	2	0	4	0	0	0	0	0
766	12.7667	2	0	2	0	0	0	0	0
767	12.7833	2	0	2	0	0	0	0	0
768	12.8	2	0	2	0	0	0	0	0
769	12.8167	2	0	2	0	0	0	0	0
770	12.8333	2	0	2	0	0	0	0	0
771	12.85	2	0	2	0	0	0	0	0
772	12.8667	2	0	3	0	0	0	0	0
773	12.8833	2	0	3	0	0	0	0	0
774	12.9	2	0	3	0	0	0	0	0
775	12.9167	2	0	0	0	0	0	0	0
776	12.9333	2	0	0	0	0	0	0	0
777	12.95	2	0	0	0	0	0	0	0
778	12.9667	2	0	0	0	0	0	0	0
779	12.9833	2	0	0	0	0	0	0	0
780	13	1	0	0	0	0	0	0	0
781	13.0167	1	0	0	0	0	0	0	0
782	13.0333	1	0	0	0	0	0	0	0
783	13.05	1	0	0	0	0	0	0	0
784	13.0667	1	0	0	0	0	0	0	0
785	13.0833	1	0	0	0	0	0	0	0
786	13.1	1	0	0	0	0	0	0	0
787	13.1167	1	0	0	0	0	0	0	0
788	13.1333	1	0	0	0	0	0	0	0
789	13.15	1	0	0	0	0	0	0	0
790	13.1667	1	0	0	0	0	0	0	0
791	13.1833	1	0	0	0	0	0	0	0
792	13.2	1	0	0	0	0	0	0	0
793	13.2167	1	0	0	0	0	0	0	0
794	13.2333	1	0	0	0	0	0	0	0
795	13.25	1	0	0	0	0	0	0	0
796	13.2667	1	0	0	0	0	0	0	0
797	13.2833	1	0	0	0	0	0	0	0
798	13.3	1	0	0	0	0	0	0	0
799	13.3167	1	0	0	0	0	0	0	0
800	13.3333	2	0	0	0	0	0	0	0
801	13.35	2	0	0	0	0	0	0	0
802	13.3667	2	0	0	0	0	0	0	0
803	13.3833	2	0	0	0	0	0	0	0
804	13.4	2	0	0	0	0	0	0	0
805	13.4167	2	0	0	0	0	0	0	0
806	13.4333	3	0	1	0	0	0	0	0
807	13.45	3	0	1	0	0	0	0	0
808	13.4667	3	0	1	0	0	0	0	0
809	13.4833	3	0	1	0	0	0	0	0
810	13.5	2	0	1	0	0	0	0	0
811	13.5167	2	0	1	0	0	0	0	0
812	13.5333	2	0	1	0	0	0	0	0
813	13.55	2	0	1	0	0	0	0	0
814	13.5667	2	0	1	0	1	0	0	0
815	13.5833	2	0	1	0	1	0	0	0
816	13.6	2	0	1	0	1	0	0	0
817	13.6167	2	0	1	0	1	0	0	0
818	13.6333	1	0	1	0	1	0	0	0
819	13.65	1	0	1	0	1	0	0	0
820	13.6667	1	0	1	0	1	0	0	0
821	13.6833	1	0	1	0	1	0	0	0
822	13.7	1	0	0	0	1	0	0	0
823	13.7167	1	0	0	0	0	0	0	0
824	13.7333	1	0	0	0	0	0	0	0
825	13.75	1	0	0	0	0	0	0	0
826	13.7667	1	0	0	0	0	0	0	0
827	13.7833	1	0	0	0	0	0	0	0
828	13.8	1	0	0	0	0	0	0	0
829	13.8167	1	0	1	0	0	0	0	0
830	13.8333	1	0	1	0	0	0	0	0
831	13.85	1	0	1	0	0	0	0	0
832	13.8667	0	0	0	0	0	0	0	0
833	13.8833	0	0	0	0	0	0	0	0
834	13.9	0	0	0	0	0	0	0	0
835	13.9167	0	0	0	0	0	0	0	0
836	13.9333	0	0	0	0	0	0	0	0
837	13.95	0	0	0	0	0	0	0	0
838	13.9667	0	0	0	0	0	0	0	0
839	13.9833	0	0	0	0	0	0	0	0
840	14	0	0	0	0	0	0	0	0
841	14.0167	0	0	0	0	0	0	0	0
842	14.0333	0	0	0	0	0	0	0	0
843	14.05	0	0	0	0	0	0	0	0
844	14.0667	0	0	0	0	0	0	0	0
845	14.0833	0	0	0	0	0	0	0	0
846	14.1	0	0	0	0	0	0	0	0
847	14.1167	1	0	0	0	0	0	0	0
848	14.1333	1	0	0	0	0	0	0	0
849	14.15	1	0	0	0	0	0	0	0
850	14.1667	1	0	0	0	0	0	0	0
851	14.1833	1	0	0	0	0	0	0	0
852	14.2	1	0	0	0	0	0	0	0
853	14.2167	1	0	0	0	0	0	0	0
854	14.2333	1	0	0	0	0	0	0	0
855	14.25	1	0	0	0	0	0	0	0
856	14.2667	1	0	0	0	0	0	0	0
857	14.2833	1	0	0	0	0	0	0	0
858	14.3	1	0	0	0	0	0	0	0
859	14.3167	1	0	0	0	0	0	0	0
860	14.3333	1	0	0	0	0	0	0	0
861	14.35	1	0	0	0	0	0	0	0
862	14.3667	2	0	0	0	0	0	0	0
863	14.3833	2	0	0	0	0	0	0	0
864	14.4	2	0	0	0	0	0	0	0
865	14.4167	2	0	0	0	0	0	0	0
866	14.4333	2	0	0	0	0	0	0	0
867	14.45	2	0	0	0	0	0	0	0
868	14.4667	3	0	0	0	0	0	0	0
869	14.4833	3	0	0	0	0	0	0	0
870	14.5	3	0	0	0	0	0	0	0
871	14.5167	3	0	0	0	0	0	0	0
872	14.5333	3	0	0	0	0	0	0	0
873	14.55	3	0	0	0	0	0	0	0
874	14.5667	3	0	0	0	0	0	0	0
875	14.5833	3	0	0	0	0	0	0	0
876	14.6	3	0	0	0	0	0	0	0
877	14.6167	3	0	0	0	0	0	0	0
878	14.6333	3	0	0	0	0	0	0	0
879	14.65	2	0	0	0	0	0	0	0
880	14.6667	1	0	0	0	0	0	0	0
881	14.6833	1	0	0	0	0	0	0	0
882	14.7	1	0	0	0	0	0	0	0
883	14.7167	1	0	0	0	0	0	0	0
884	14.7333	1	0	0	0	0	0	0	0
885	14.75	1	0	0	0	0	0	0	0
886	14.7667	1	0	0	0	0	0	0	0
887	14.7833	1	0	0	0	0	0	0	0
888	14.8	1	0	0	0	0	0	0	0
889	14.8167	1	0	0	0	0	0	0	0
890	14.8333	1	0	0	0	0	0	0	0
891	14.85	1	0	0	0	0	0	0	0
892	14.8667	1	0	0	0	0	0	0	0
893	14.8833	0	0	0	0	0	0	0	0
894	14.9	0	0	0	0	0	0	0	0
895	14.9167	0	0	0	0	0	0	0	0
896	14.9333	0	0	0	0	0	0	0	0
897	14.95	0	0	0	0	0	0	0	0
898	14.9667	0	0	0	0	0	0	0	0
899	14.9833	0	0	0	0	0	0	0	0
900	15	0	0	0	0	0	0	0	0
901	15.0167	0	0	0	0	0	0	0	0
902	15.0333	0	0	0	0	0	0	0	0
903	15.05	0	0	0	0	0	0	0	0
904	15.0667	0	0	0	0	0	0	0	0
905	15.0833	0	0	0	0	0	0	0	0
906	15.1	0	0	0	0	0	0	0	0
907	15.1167	0	0	0	0	0	0	0	0
908	15.1333	0	0	0	0	0	0	0	0
909	15.15	0	0	0	0	0	0	0	0
910	15.1667	0	0	0	0	0	0	0	0
911	15.1833	0	0	0	0	0	0	0	0
912	15.2	0	0	0	0	0	0	0	0
913	15.2167	0	0	0	0	0	0	0	0
914	15.2333	0	0	0	0	0	0	0	0
915	15.25	0	0	0	0	0	0	0	0
916	15.2667	0	0	0	0	0	0	0	0
917	15.2833	0	0	0	0	0	0	0	0
918	15.3	0	0	0	0	0	0	0	0
919	15.3167	1	0	0	0	0	0	0	0
920	15.3333	1	0	0	0	0	0	0	0
921	15.35	1	0	0	0	0	0	0	0
922	15.3667	1	0	0	0	0	0	0	0
923	15.3833	1	0	0	0	0	0	0	0
924	15.4	1	0	0	0	0	0	0	0
925	15.4167	2	0	0	0	0	0	0	0
926	15.4333	1	0	0	0	0	0	0	0
927	15.45	1	0	0	0	0	0	0	0
928	15.4667	1	0	0	0	0	0	0	0
929	15.4833	1	0	0	0	0	0	0	0
930	15.5	0	0	0	0	0	0	0	0
931	15.5167	2	0	0	0	1	0	0	0
932	15.5333	2	0	0	0	1	0	0	0
933	15.55	2	0	0	0	1	0	0	0
934	15.5667	2	0	0	0	1	0	0	0
935	15.5833	2	0	0	0	1	0	0	0
936	15.6	2	0	0	0	0	0	0	0
937	15.6167	2	0	0	0	0	0	0	0
938	15.6333	1	0	0	0	0	0	0	0
939	15.65	1	0	0	0	0	0	0	0
940	15.6667	1	0	0	0	0	0	0	0
941	15.6833	1	0	0	0	0	0	0	0
942	15.7	1	0	0	0	0	0	0	0
943	15.7167	1	0	0	0	0	0	0	0
944	15.7333	1	0	0	0	0	0	0	0
945	15.75	1	0	0	0	0	0	0	0
946	15.7667	0	0	0	0	0	0	0	0
947	15.7833	0	0	0	0	0	0	0	0
948	15.8	0	0	0	0	0	0	0	0
949	15.8167	0	0	0	0	0	0	0	0
950	15.8333	1	0	0	0	0	0	0	0
951	15.85	1	0	0	0	0	0	0	0
952	15.8667	1	0	0	0	0	0	0	0
953	15.8833	1	0	0	0	0	0	0	0
954	15.9	1	0	0	0	0	0	0	0
955	15.9167	1	0	0	0	0	0	0	0
956	15.9333	3	0	0	0	0	0	0	0
957	15.95	3	0	0	0	0	0	0	0
958	15.9667	3	0	0	0	0	0	0	0
959	15.9833	3	0	0	0	0	0	0	0
960	16	3	0	0	0	0	0	0	0
961	16.0167	2	0	0	0	0	0	0	0
962	16.0333	2	0	0	0	0	0	0	0
963	16.05	2	0	0	0	0	0	0	0
964	16.0667	1	0	0	0	0	0	0	0
965	16.0833	1	0	0	0	0	0	0	0
966	16.1	1	0	0	0	0	0	0	0
967	16.1167	1	0	0	0	0	0	0	0
968	16.1333	1	0	0	0	0	0	0	0
969	16.15	1	0	0	0	0	0	0	0
970	16.1667	1	0	0	0	0	0	0	0
971	16.1833	1	0	0	0	0	0	0	0
972	16.2	1	0	0	0	0	0	0	0
973	16.2167	1	0	0	0	0	0	0	0
974	16.2333	1	0	0	0	0	0	0	0
975	16.25	1	0	0	0	0	0	0	0
976	16.2667	1	0	0	0	0	0	0	0
977	16.2833	1	0	1	0	0	0	0	0
978	16.3	1	0	1	0	0	0	0	0
979	16.3167	1	0	1	0	0	0	0	0
980	16.3333	1	0	1	0	0	0	0	0
981	16.35	1	0	1	0	0	0	0	0
982	16.3667	1	0	1	0	0	0	0	0
983	16.3833	1	0	1	0	0	0	0	0
984	16.4	1	0	1	0	0	0	0	0
985	16.4167	1	0	1	0	0	0	0	0
986	16.4333	1	0	0	0	0	0	0	0
987	16.45	1	0	0	0	0	0	0	0
988	16.4667	1	0	0	0	0	0	0	0
989	16.4833	1	0	0	0	0	0	0	0
990	16.5	1	0	0	0	0	0	0	0
991	16.5167	1	0	0	0	0	0	0	0
992	16.5333	2	0	0	0	0	0	0	0
993	16.55	2	0	0	0	0	0	0	0
994	16.5667	2	0	0	0	0	0	0	0
995	16.5833	1	0	0	0	0	0	0	0
996	16.6	1	0	0	0	0	0	0	0
997	16.6167	1	0	0	0	0	0	0	0
998	16.6333	1	0	0	0	0	0	0	0
999	16.65	1	0	0	0	0	0	0	0
1000	16.6667	1	0	0	0	0	0	0	0
1001	16.6833	2	0	1	0	0	0	0	0
1002	16.7	2	0	1	0	0	0	0	0
1003	16.7167	2	0	1	0	0	0	0	0
1004	16.7333	2	0	1	0	0	0	0	0
1005	16.75	1	0	1	0	0	0	0	0
1006	16.7667	1	0	1	0	0	0	0	0
1007	16.7833	1	0	0	0	0	0	0	0
1008	16.8	1	0	0	0	0	0	0	0
1009	16.8167	1	0	0	0	0	0	0	0
1010	16.8333	1	0	0	0	0	0	0	0
1011	16.85	1	0	0	0	0	0	0	0
1012	16.8667	1	0	0	0	0	0	0	0
1013	16.8833	1	0	0	0	0	0	0	0
1014	16.9	1	0	0	0	0	0	0	0
1015	16.9167	1	0	0	0	0	0	0	0
1016	16.9333	1	0	0	0	0	0	0	0
1017	16.95	1	0	0	0	0	0	0	0
1018	16.9667	1	0	0	0	0	0	0	0
1019	16.9833	1	0	0	0	0	0	0	0
1020	17	1	0	0	0	0	0	0	0
1021	17.0167	1	0	0	0	0	0	0	0
1022	17.0333	1	0	0	0	0	0	0	0
1023	17.05	1	0	0	0	0	0	0	0
1024	17.0667	1	0	0	0	0	0	0	0
1025	17.0833	1	0	0	0	0	0	0	0
1026	17.1	1	0	0	0	0	0	0	0
1027	17.1167	1	0	0	0	0	0	0	0
1028	17.1333	1	0	0	0	0	0	0	0
1029	17.15	1	0	0	0	0	0	0	0
1030	17.1667	1	0	0	0	0	0	0	0
1031	17.1833	2	0	0	0	1	0	0	0
1032	17.2	2	0	0	0	1	0	0	0
1033	17.2167	2	0	0	0	1	0	0	0
1034	17.2333	2	0	0	0	1	0	0	0
1035	17.25	2	0	0	0	0	0	0	0
1036	17.2667	2	0	2	0	0	0	0	0
1037	17.2833	2	0	2	0	0	0	0	0
1038	17.3	1	0	2	0	0	0	0	0
1039	17.3167	1	0	2	0	0	0	0	0
1040	17.3333	1	0	2	0	0	0	0	0
1041	17.35	1	0	2	0	0	0	0	0
1042	17.3667	1	0	2	0	0	0	0	0
1043	17.3833	0	0	2	0	0	0	0	0
1044	17.4	0	0	2	0	0	0	0	0
1045	17.4167	0	0	2	0	0	0	0	0
1046	17.4333	0	0	2	0	0	0	0	0
1047	17.45	0	0	2	0	0	0	0	0
1048	17.4667	0	28	2	0	0	0	0	0
1049	17.4833	0	28	2	0	0	0	0	0
1050	17.5	0	28	0	0	0	0	0	0
1051	17.5167	0	28	0	0	0	0	0	0
1052	17.5333	0	28	0	0	0	0	0	0
1053	17.55	0	28	0	0	0	0	0	0
1054	17.5667	0	28	0	0	0	0	0	0
1055	17.5833	0	28	0	0	0	0	0	0
1056	17.6	0	28	0	0	0	0	0	0
1057	17.6167	0	0	0	0	0	0	0	0
1058	17.6333	0	0	0	0	0	0	0	0
1059	17.65	0	0	0	0	0	0	0	0
1060	17.6667	0	0	0	0	0	0	0	0
1061	17.6833	0	0	0	0	0	0	0	0
1062	17.7	0	0	0	0	0	0	0	0
1063	17.7167	0	0	0	0	0	0	0	0
1064	17.7333	0	0	0	0	0	0	0	0
1065	17.75	0	0	0	0	0	0	0	0
1066	17.7667	0	0	0	0	1	0	0	0
1067	17.7833	1	0	0	0	1	0	0	0
1068	17.8	1	0	0	0	1	0	0	0
1069	17.8167	1	0	0	0	0	0	0	0
1070	17.8333	1	0	0	0	0	0	0	0
1071	17.85	1	0	0	0	0	0	0	0
1072	17.8667	1	0	0	0	0	0	0	0
1073	17.8833	1	0	0	0	0	0	0	0
1074	17.9	1	0	0	0	0	0	0	0
1075	17.9167	2	0	0	0	0	0	0	0
1076	17.9333	2	0	0	0	0	0	0	0
1077	17.95	2	0	0	0	0	0	0	0
1078	17.9667	1	0	0	0	2	0	0	0
1079	17.9833	1	0	0	0	2	0	0	0
1080	18	0	0	0	0	2	0	0	0
1081	18.0167	0	0	0	0	2	0	0	0
1082	18.0333	0	0	0	0	2	0	0	0
1083	18.05	0	0	0	0	2	0	0	0
1084	18.0667	0	0	0	0	2	0	0	0
1085	18.0833	0	0	0	0	2	0	0	0
1086	18.1	0	0	0	0	2	0	0	0
1087	18.1167	0	0	0	0	2	0	0	0
1088	18.1333	0	0	0	0	2	0	0	0
1089	18.15	0	0	0	0	2	0	0	0
1090	18.1667	0	0	0	0	2	0	0	0
1091	18.1833	0	0	0	0	2	0	0	0
1092	18.2	0	0	0	0	2	0	0	0
1093	18.2167	0	0	0	0	2	0	0	0
1094	18.2333	0	0	0	0	2	0	0	0
1095	18.25	0	0	0	0	2	0	0	0
1096	18.2667	0	0	0	0	2	0	0	0
1097	18.2833	0	0	0	0	2	0	0	0
1098	18.3	0	0	0	0	2	0	0	0
1099	18.3167	0	0	0	0	2	0	0	0
1100	18.3333	0	0	0	0	2	0	0	0
1101	18.35	0	0	0	0	0	0	0	0
1102	18.3667	0	0	0	0	0	0	0	0
1103	18.3833	0	0	0	0	0	0	0	0
1104	18.4	0	0	0	0	0	0	0	0
1105	18.4167	0	0	0	0	0	0	0	0
1106	18.4333	0	0	0	0	0	0	0	0
1107	18.45	0	0	0	0	0	0	0	0
1108	18.4667	1	0	0	0	0	0	0	0
1109	18.4833	1	0	0	0	0	0	0	0
1110	18.5	1	0	0	0	0	0	0	0
1111	18.5167	1	0	0	0	0	1	0	0
1112	18.5333	1	0	0	0	0	1	0	0
1113	18.55	1	0	0	0	0	0	0	0
1114	18.5667	1	0	0	0	0	0	0	0
1115	18.5833	3	0	0	0	0	0	0	0
1116	18.6	3	0	0	0	0	0	0	0
1117	18.6167	3	0	0	0	0	0	0	0
1118	18.6333	3	0	0	0	0	0	0	0
1119	18.65	3	0	0	0	0	0	0	0
1120	18.6667	3	0	0	0	0	0	0	0
1121	18.6833	3	0	0	0	0	0	0	0
1122	18.7	3	0	0	0	0	0	0	0
1123	18.7167	3	0	0	0	0	0	0	0
1124	18.7333	3	0	0	0	0	0	0	0
1125	18.75	3	0	0	0	0	0	0	0
1126	18.7667	3	0	0	0	0	0	0	0
1127	18.7833	3	0	0	0	0	0	0	0
1128	18.8	3	0	0	0	0	0	0	0
1129	18.8167	3	0	0	0	0	0	0	0
1130	18.8333	3	0	0	0	0	0	0	0
1131	18.85	3	0	0	0	0	0	0	0
1132	18.8667	3	0	0	0	0	0	0	0
1133	18.8833	3	0	0	0	0	0	0	0
1134	18.9	3	0	0	0	0	0	0	0
1135	18.9167	3	0	0	0	0	0	0	0
1136	18.9333	2	0	0	0	0	0	0	0
1137	18.95	2	0	0	0	0	0	0	0
1138	18.9667	2	0	0	0	0	0	0	0
1139	18.9833	1	0	0	0	0	0	0	0
1140	19	1	0	0	0	0	0	0	0
1141	19.0167	1	0	0	0	0	0	0	0
1142	19.0333	1	0	0	0	0	0	0	0
1143	19.05	1	0	0	0	0	0	0	0
1144	19.0667	1	0	0	0	0	0	0	0
1145	19.0833	1	0	0	0	0	0	0	0
1146	19.1	1	0	0	0	0	0	0	0
1147	19.1167	1	0	0	0	0	0	0	0
1148	19.1333	1	0	0	0	0	0	0	0
1149	19.15	1	0	0	0	0	0	0	0
1150	19.1667	1	0	0	0	0	0	0	0
1151	19.1833	1	0	0	0	0	0	0	0
1152	19.2	1	0	0	0	0	0	0	0
1153	19.2167	1	0	0	0	0	0	0	0
1154	19.2333	1	0	0	0	0	0	0	0
1155	19.25	1	0	0	0	0	0	0	0
1156	19.2667	1	0	0	0	0	0	0	0
1157	19.2833	1	0	0	0	0	0	0	0
1158	19.3	1	0	0	0	0	0	0	0
1159	19.3167	1	0	0	0	0	0	0	0
1160	19.3333	1	0	0	0	0	0	0	0
1161	19.35	1	0	0	0	0	0	0	0
1162	19.3667	1	0	0	0	0	0	0	0
1163	19.3833	1	0	0	0	0	0	0	0
1164	19.4	1	0	0	0	0	0	0	0
1165	19.4167	2	0	1	0	0	0	0	0
1166	19.4333	2	0	1	0	0	0	0	0
1167	19.45	2	0	1	0	0	0	0	0
1168	19.4667	2	0	1	0	0	0	0	0
1169	19.4833	2	0	1	0	0	0	0	0
1170	19.5	2	0	1	0	0	0	0	0
1171	19.5167	2	0	1	0	0	1	0	0
1172	19.5333	2	0	1	0	0	1	0	0
1173	19.55	2	0	1	0	0	0	0	0
1174	19.5667	2	0	1	0	0	0	0	0
1175	19.5833	2	0	0	0	0	0	0	0
1176	19.6	2	0	0	0	0	0	0	0
1177	19.6167	2	0	0	0	0	0	0	0
1178	19.6333	2	0	0	0	0	0	0	0
1179	19.65	2	0	0	0	0	0	0	0
1180	19.6667	2	0	0	0	0	0	0	0
1181	19.6833	2	0	0	0	0	0	0	0
1182	19.7	2	0	0	0	0	0	0	0
1183	19.7167	2	0	0	0	0	0	0	0
1184	19.7333	1	0	0	0	0	0	0	0
1185	19.75	1	0	0	0	0	0	0	0
1186	19.7667	1	0	0	0	0	0	0	0
1187	19.7833	1	0	0	0	0	0	0	0
1188	19.8	1	0	0	0	0	0	0	0
1189	19.8167	1	0	0	0	0	0	0	0
1190	19.8333	1	0	0	0	0	0	0	0
1191	19.85	1	0	0	0	0	0	0	0
1192	19.8667	1	0	0	0	0	0	0	0
1193	19.8833	1	0	0	0	0	0	0	0
1194	19.9	1	0	0	0	0	0	0	0
1195	19.9167	1	0	0	0	0	0	0	0
1196	19.9333	1	0	0	0	0	0	0	0
1197	19.95	1	0	0	0	0	0	0	0
1198	19.9667	1	0	0	0	0	0	0	0
1199	19.9833	2	0	0	0	0	0	0	0
1200	20	2	0	0	0	0	0	0	0
1201	20.0167	2	0	0	0	0	0	0	0
1202	20.0333	2	0	0	0	0	0	0	0
1203	20.05	2	0	0	0	0	0	0	0
1204	20.0667	2	0	0	0	0	0	0	0
1205	20.0833	0	0	0	0	0	0	0	0
1206	20.1	0	0	0	0	0	0	0	0
1207	20.1167	0	0	0	0	0	0	0	0
1208	20.1333	0	0	0	0	0	0	0	0
1209	20.15	0	0	0	0	0	0	0	0
1210	20.1667	0	0	0	0	0	0	0	0
1211	20.1833	0	0	0	0	0	0	0	0
1212	20.2	0	0	0	0	0	0	0	0
1213	20.2167	0	0	0	0	0	0	0	0
1214	20.2333	0	0	0	0	0	0	0	0
1215	20.25	0	0	0	0	0	0	0	0
1216	20.2667	0	0	0	0	0	0	0	0
1217	20.2833	0	0	0	0	0	0	0	0
1218	20.3	0	0	0	0	0	0	0	0
1219	20.3167	0	0	0	0	0	0	0	0
1220	20.3333	0	0	0	0	0	0	0	0
1221	20.35	0	0	0	0	0	0	0	0
1222	20.3667	0	0	0	0	0	0	0	0
1223	20.3833	0	0	0	0	0	0	0	0
1224	20.4	0	0	0	0	0	0	0	0
1225	20.4167	0	0	0	0	0	0	0	0
1226	20.4333	0	0	0	0	0	0	0	0
1227	20.45	0	0	0	0	0	0	0	0
1228	20.4667	0	0	0	0	0	0	0	0
1229	20.4833	0	0	0	0	2	0	0	0
1230	20.5	0	0	0	0	2	0	0	0
1231	20.5167	0	0	0	0	0	0	0	0
1232	20.5333	0	0	0	0	0	0	0	0
1233	20.55	0	0	0	0	0	0	0	0
1234	20.5667	0	0	0	0	0	0	0	0
1235	20.5833	0	0	0	0	0	0	0	0
1236	20.6	0	0	0	0	0	0	0	0
1237	20.6167	0	0	0	0	0	0	0	0
1238	20.6333	0	0	0	0	0	0	0	0
1239	20.65	0	0	0	0	0	0	0	0
1240	20.6667	0	0	0	0	0	0	0	0
1241	20.6833	0	0	0	0	0	0	0	0
1242	20.7	0	0	0	0	0	0	0	0
1243	20.7167	0	0	0	0	0	0	0	0
1244	20.7333	0	0	0	0	0	0	0	0
1245	20.75	0	0	0	0	0	0	0	0
1246	20.7667	0	0	1	0	0	0	0	0
1247	20.7833	0	0	1	0	0	0	0	0
1248	20.8	0	0	1	0	0	0	0	0
1249	20.8167	0	0	1	0	0	0	0	0
1250	20.8333	0	0	1	0	0	0	0	0
1251	20.85	0	0	1	0	0	0	0	0
1252	20.8667	0	0	1	0	0	0	0	0
1253	20.8833	0	0	1	0	0	0	0	0
1254	20.9	0	0	1	0	0	0	0	0
1255	20.9167	0	0	1	0	0	0	0	0
1256	20.9333	0	0	0	0	0	0	0	0
1257	20.95	0	0	0	0	0	0	0	0
1258	20.9667	0	0	0	0	0	0	0	0
1259	20.9833	0	0	0	0	0	0	0	0
1260	21	0	0	0	0	0	0	0	0
1261	21.0167	0	0	0	0	0	0	0	0
1262	21.0333	0	0	0	0	0	0	0	0
1263	21.05	0	0	0	0	0	0	0	0
1264	21.0667	0	0	0	0	0	0	0	0
1265	21.0833	0	0	0	0	0	0	0	0
1266	21.1	0	0	0	0	0	0	0	0
1267	21.1167	0	0	0	0	0	0	0	0
1268	21.1333	0	0	0	0	0	0	0	0
1269	21.15	0	0	0	0	0	0	0	0
1270	21.1667	1	0	0	0	0	0	0	0
1271	21.1833	1	0	0	0	0	0	0	0
1272	21.2	1	0	0	0	0	0	0	0
1273	21.2167	1	0	0	0	0	0	0	0
1274	21.2333	1	0	0	0	0	0	0	0
1275	21.25	1	0	0	0	0	0	0	0
1276	21.2667	1	0	0	0	0	1	0	0
1277	21.2833	1	0	0	0	0	1	0	0
1278	21.3	1	0	0	0	0	1	0	0
1279	21.3167	1	0	0	0	0	1	0	0
1280	21.3333	1	0	0	0	0	0	0	0
1281	21.35	1	0	0	0	0	0	0	0
1282	21.3667	1	0	0	0	0	0	0	0
1283	21.3833	1	0	0	0	0	0	0	0
1284	21.4	1	0	0	0	0	0	0	0
1285	21.4167	1	0	0	0	0	0	0	0
1286	21.4333	1	0	0	0	0	0	0	0
1287	21.45	1	0	0	0	0	0	0	0
1288	21.4667	2	0	0	0	0	0	0	0
1289	21.4833	2	0	0	0	0	0	0	0
1290	21.5	2	0	0	0	0	0	0	0
1291	21.5167	2	0	0	0	0	0	0	0
1292	21.5333	2	0	0	0	0	0	0	0
1293	21.55	2	0	0	0	0	0	0	0
1294	21.5667	2	0	0	0	0	0	0	0
1295	21.5833	2	0	0	0	0	0	0	0
1296	21.6	2	0	0	0	0	0	0	0
1297	21.6167	2	0	0	0	0	0	0	0
1298	21.6333	2	0	0	0	0	0	0	0
1299	21.65	2	0	0	0	0	0	0	0
1300	21.6667	2	0	0	0	0	0	0	0
1301	21.6833	2	0	0	0	0	0	0	0
1302	21.7	2	0	0	0	0	0	0	0
1303	21.7167	2	0	0	0	0	0	0	0
1304	21.7333	2	0	0	0	0	0	0	0
1305	21.75	2	0	0	0	0	0	0	0
1306	21.7667	2	0	0	0	0	0	0	0
1307	21.7833	2	0	0	0	0	0	0	0
1308	21.8	2	0	0	0	0	0	0	0
1309	21.8167	2	0	0	0	0	0	0	0
1310	21.8333	2	0	0	0	0	0	0	0
1311	21.85	2	0	0	0	0	0	0	0
1312	21.8667	2	0	0	0	0	0	0	0
1313	21.8833	2	0	0	0	0	0	0	0
1314	21.9	2	0	0	0	0	0	0	0
1315	21.9167	2	0	0	0	0	0	0	0
1316	21.9333	2	0	0	0	0	0	0	0
1317	21.95	2	0	0	0	0	0	0	0
1318	21.9667	3	0	0	0	0	0	0	0
1319	21.9833	3	0	0	0	0	0	0	0
1320	22	3	0	0	0	0	0	0	0
1321	22.0167	3	0	0	0	5	0	0	0
1322	22.0333	3	0	0	0	5	0	0	0
1323	22.05	3	0	0	0	5	0	0	0
1324	22.0667	3	0	0	0	5	0	0	0
1325	22.0833	3	0	0	0	5	0	0	0
1326	22.1	3	0	0	0	5	0	0	0
1327	22.1167	3	0	0	0	5	0	0	0
1328	22.1333	3	0	0	0	5	0	0	0
1329	22.15	3	0	0	0	5	0	0	0
1330	22.1667	3	0	0	0	5	0	0	0
1331	22.1833	3	0	0	0	5	0	0	0
1332	22.2	2	0	0	0	5	0	0	0
1333	22.2167	2	0	0	0	5	0	0	0
1334	22.2333	2	0	0	0	5	0	0	0
1335	22.25	1	0	0	0	5	0	0	0
1336	22.2667	1	0	0	0	5	0	0	0
1337	22.2833	1	0	0	0	5	0	0	0
1338	22.3	1	0	0	0	5	0	0	0
1339	22.3167	2	0	0	0	5	0	0	0
1340	22.3333	2	0	0	0	5	0	0	0
1341	22.35	2	0	0	0	5	0	0	0
1342	22.3667	2	0	0	0	5	0	0	0
1343	22.3833	2	0	0	0	5	0	0	0
1344	22.4	2	0	0	0	5	0	0	0
1345	22.4167	2	0	1	0	5	0	0	0
1346	22.4333	2	0	1	0	5	0	0	0
1347	22.45	2	0	0	0	5	0	0	0
1348	22.4667	2	0	0	0	5	0	0	0
1349	22.4833	1	0	0	0	5	0	0	0
1350	22.5	0	0	0	0	5	0	0	0
1351	22.5167	0	0	0	0	5	0	0	0
1352	22.5333	0	0	0	0	5	0	0	0
1353	22.55	0	0	0	0	5	0	0	0
1354	22.5667	1	0	0	0	5	0	0	0
1355	22.5833	1	0	0	0	5	0	0	0
1356	22.6	1	0	0	0	5	0	0	0
1357	22.6167	2	0	0	0	5	0	0	0
1358	22.6333	2	0	0	0	5	0	0	0
1359	22.65	2	0	0	0	5	0	0	0
1360	22.6667	1	0	0	0	5	0	0	0
1361	22.6833	1	0	0	0	5	0	0	0
1362	22.7	0	0	0	0	5	0	0	0
1363	22.7167	0	0	0	0	5	0	0	0
1364	22.7333	0	0	0	0	5	0	0	0
1365	22.75	0	0	0	0	5	0	0	0
1366	22.7667	1	0	0	0	5	0	0	0
1367	22.7833	1	0	0	0	5	0	0	0
1368	22.8	1	0	0	0	5	0	0	0
1369	22.8167	1	0	0	0	5	0	0	0
1370	22.8333	1	0	0	0	5	0	0	0
1371	22.85	1	0	0	0	5	0	0	0
1372	22.8667	1	0	0	0	5	0	0	0
1373	22.8833	1	0	0	0	5	0	0	0
1374	22.9	1	0	0	0	5	0	0	0
1375	22.9167	1	0	0	0	5	0	0	0
1376	22.9333	1	0	0	0	5	0	0	0
1377	22.95	1	0	0	0	5	0	0	0
1378	22.9667	1	0	0	0	5	0	0	0
1379	22.9833	1	0	0	0	5	0	0	0
1380	23	0	0	0	0	5	0	0	0
1381	23.0167	0	0	0	0	5	0	0	0
1382	23.0333	1	0	0	0	5	0	0	0
1383	23.05	1	0	0	0	5	0	0	0
1384	23.0667	2	0	0	0	5	0	0	0
1385	23.0833	1	0	0	0	5	0	0	0
1386	23.1	1	0	0	0	5	0	0	0
1387	23.1167	2	0	0	0	5	0	0	0
1388	23.1333	2	0	0	0	5	0	0	0
1389	23.15	2	0	0	0	5	0	0	0
1390	23.1667	2	0	0	1	5	0	0	0
1391	23.1833	2	0	0	1	5	0	0	0
1392	23.2	2	0	0	1	5	0	0	0
1393	23.2167	2	0	0	0	5	0	0	0
1394	23.2333	1	0	0	0	5	0	0	0
1395	23.25	1	0	0	0	5	0	0	0
1396	23.2667	2	0	1	0	5	0	0	0
1397	23.2833	2	0	1	0	5	0	0	0
1398	23.3	2	0	1	0	5	0	0	0
1399	23.3167	2	0	1	0	5	0	0	0
1400	23.3333	2	0	1	0	5	0	0	0
1401	23.35	1	0	1	0	5	0	0	0
1402	23.3667	1	0	1	0	5	0	0	0
1403	23.3833	1	0	1	0	5	0	0	0
1404	23.4	1	0	1	0	5	0	0	0
1405	23.4167	1	0	1	0	5	0	0	0
1406	23.4333	1	0	2	0	5	0	0	0
1407	23.45	1	0	2	0	5	0	0	0
1408	23.4667	1	0	1	0	5	0	0	0
1409	23.4833	1	0	1	0	5	0	0	0
1410	23.5	1	0	1	0	5	0	0	0
1411	23.5167	1	0	1	0	5	0	0	0
1412	23.5333	1	0	1	0	5	0	0	0
1413	23.55	1	0	1	0	5	0	0	0
1414	23.5667	1	0	1	0	5	0	0	0
1415	23.5833	1	0	1	0	5	0	0	0
1416	23.6	1	0	1	0	5	0	0	0
1417	23.6167	1	0	1	0	5	0	0	0
1418	23.6333	1	0	1	0	5	0	0	0
1419	23.65	1	0	1	0	5	0	0	0
1420	23.6667	1	0	1	0	5	0	0	0
1421	23.6833	1	0	1	0	5	0	0	0
1422	23.7	1	0	1	0	5	0	0	0
1423	23.7167	1	0	1	0	5	0	0	0
1424	23.7333	1	0	1	0	5	0	0	0
1425	23.75	1	0	1	0	5	0	0	0
1426	23.7667	1	0	1	0	5	0	0	0
1427	23.7833	1	0	1	0	5	0	0	0
1428	23.8	1	0	1	0	5	0	0	0
1429	23.8167	1	0	1	0	5	0	0	0
1430	23.8333	1	0	1	0	5	0	0	0
1431	23.85	1	0	1	0	5	0	0	0
1432	23.8667	1	0	1	0	5	0	0	0
1433	23.8833	1	0	1	0	5	0	0	0
1434	23.9	1	0	1	0	5	0	0	0
1435	23.9167	1	0	1	0	5	0	0	0
1436	23.9333	1	0	1	0	5	0	0	0
1437	23.95	1	0	0	0	5	0	0	0
1438	23.9667	2	0	0	0	5	0	0	0
1439	23.9833	2	0	0	0	5	0	0	0
1440	24	2	0	0	0	5	0	0	0
1441	24.0167	2	0	1	0	5	0	0	0
1442	24.0333	1	0	1	0	5	0	0	0
1443	24.05	1	0	1	0	5	0	0	0
1444	24.0667	1	0	1	0	5	0	0	0
1445	24.0833	1	0	0	0	5	0	0	0
1446	24.1	1	0	0	0	5	0	0	0
1447	24.1167	1	0	0	0	5	0	0	0
1448	24.1333	1	0	0	0	5	0	0	0
1449	24.15	0	0	0	0	5	0	0	0
1450	24.1667	0	0	0	0	5	0	0	0
1451	24.1833	0	0	0	0	5	0	0	0
1452	24.2	0	0	0	0	5	0	0	0
1453	24.2167	0	0	0	0	5	0	0	0
1454	24.2333	0	0	0	0	5	0	0	0
1455	24.25	0	0	0	0	5	0	0	0
1456	24.2667	0	0	0	0	5	0	0	0
1457	24.2833	0	0	0	0	5	0	0	0
1458	24.3	0	0	0	0	5	0	0	0
1459	24.3167	0	0	0	0	5	0	0	0
1460	24.3333	0	0	0	0	5	0	0	0
1461	24.35	0	0	0	0	5	0	0	0
1462	24.3667	0	0	0	0	5	0	0	0
1463	24.3833	0	0	0	0	5	0	0	0
1464	24.4	0	0	0	0	5	0	0	0
1465	24.4167	0	0	1	0	5	0	0	0
1466	24.4333	0	0	1	0	5	0	0	0
1467	24.45	0	0	1	0	5	0	0	0
1468	24.4667	0	0	0	0	5	0	0	0
1469	24.4833	0	0	0	0	5	0	0	0
1470	24.5	0	0	0	0	5	0	0	0
1471	24.5167	0	0	0	0	5	0	0	0
1472	24.5333	0	0	0	0	5	0	0	0
1473	24.55	0	0	0	0	5	0	0	0
1474	24.5667	0	0	0	0	5	0	0	0
1475	24.5833	0	0	0	0	5	0	0	0
1476	24.6	0	0	0	0	5	0	0	0
1477	24.6167	0	0	0	0	5	0	0	0
1478	24.6333	0	0	0	0	5	0	0	0
1479	24.65	0	0	0	0	5	0	0	0
1480	24.6667	0	0	0	0	5	0	0	0
1481	24.6833	0	0	0	0	5	0	0	0
1482	24.7	0	0	0	0	5	0	0	0
1483	24.7167	0	0	0	0	5	0	0	0
1484	24.7333	0	0	0	0	5	0	0	0
1485	24.75	0	0	0	0	5	0	0	0
1486	24.7667	1	0	0	0	5	0	0	0
1487	24.7833	1	0	0	0	5	0	0	0
1488	24.8	1	0	0	0	5	0	0	0
1489	24.8167	1	0	0	0	5	0	0	0
1490	24.8333	0	0	0	0	5	0	0	0
1491	24.85	0	0	0	0	5	0	0	0
1492	24.8667	0	0	0	0	5	0	0	0
1493	24.8833	0	0	0	0	5	0	0	0
1494	24.9	0	0	0	0	5	0	0	0
1495	24.9167	0	0	0	0	5	0	0	0
1496	24.9333	0	0	1	0	5	0	0	0
1497	24.95	0	0	1	0	5	0	0	0
1498	24.9667	0	0	1	0	5	0	0	0
1499	24.9833	0	0	0	0	5	0	0	0
1500	25	0	0	0	0	5	0	0	0
1501	25.0167	0	0	0	0	5	0	0	0
1502	25.0333	0	0	0	0	5	0	0	0
1503	25.05	0	0	0	0	5	0	0	0
1504	25.0667	0	0	0	0	5	0	0	0
1505	25.0833	1	0	0	0	5	0	0	0
1506	25.1	1	0	0	0	5	0	0	0
1507	25.1167	1	0	0	0	0	0	0	0
1508	25.1333	1	0	0	0	0	0	0	0
1509	25.15	1	0	0	0	0	0	0	0
1510	25.1667	1	0	0	0	0	0	0	0
1511	25.1833	1	0	0	0	0	0	0	0
1512	25.2	1	0	0	0	0	0	0	0
1513	25.2167	1	0	0	0	0	0	0	0
1514	25.2333	1	0	0	0	0	0	0	0
1515	25.25	1	0	0	0	0	0	0	0
1516	25.2667	1	0	0	0	0	0	0	0
1517	25.2833	1	0	0	0	0	0	0	0
1518	25.3	1	0	0	0	0	0	0	0
1519	25.3167	1	0	1	0	0	0	0	0
1520	25.3333	1	0	1	0	0	0	0	0
1521	25.35	1	0	1	0	0	0	0	0
1522	25.3667	1	0	1	0	0	0	0	0
1523	25.3833	1	0	1	0	0	0	0	0
1524	25.4	1	0	1	0	0	0	0	0
1525	25.4167	0	0	1	0	0	0	0	0
1526	25.4333	0	0	1	0	0	0	0	0
1527	25.45	0	0	1	0	0	0	0	0
1528	25.4667	0	0	1	0	0	0	0	0
1529	25.4833	0	0	1	0	0	0	0	0
1530	25.5	0	0	1	0	0	0	0	0
1531	25.5167	0	0	1	0	0	0	0	0
1532	25.5333	0	0	1	0	0	0	0	0
1533	25.55	0	0	1	0	0	0	0	0
1534	25.5667	0	0	1	0	0	0	0	0
1535	25.5833	0	0	1	0	0	0	0	0
1536	25.6	0	0	1	0	0	0	0	0
1537	25.6167	1	0	1	0	0	0	0	0
1538	25.6333	1	0	1	0	0	0	0	0
1539	25.65	1	0	1	0	0	0	0	0
1540	25.6667	1	0	1	0	0	0	0	0
1541	25.6833	1	0	1	0	0	0	0	0
1542	25.7	1	0	1	0	0	0	0	0
1543	25.7167	1	0	1	0	0	0	0	0
1544	25.7333	1	0	1	0	0	0	0	0
1545	25.75	1	0	1	0	0	0	0	0
1546	25.7667	1	0	1	0	0	0	0	0
1547	25.7833	1	0	1	0	0	0	0	0
1548	25.8	1	0	1	0	0	0	0	0
1549	25.8167	1	0	1	0	0	0	0	0
1550	25.8333	1	0	1	0	0	0	0	0
1551	25.85	1	0	1	0	0	0	0	0
1552	25.8667	1	0	1	0	1	0	0	0
1553	25.8833	1	0	1	0	1	0	0	0
1554	25.9	1	0	1	0	1	0	0	0
1555	25.9167	1	0	1	0	1	0	0	0
1556	25.9333	1	0	1	1	1	0	0	0
1557	25.95	0	0	1	1	0	0	0	0
1558	25.9667	0	0	1	0	0	0	0	0
1559	25.9833	0	0	1	0	0	0	0	0
1560	26	0	0	1	0	0	0	0	0
1561	26.0167	0	0	1	0	0	0	0	0
1562	26.0333	0	0	1	0	0	0	0	0
1563	26.05	0	0	1	0	0	0	0	0
1564	26.0667	0	0	1	0	0	0	0	0
1565	26.0833	0	0	1	0	0	0	0	0
1566	26.1	0	0	1	0	0	0	0	0
1567	26.1167	1	0	1	0	0	0	0	0
1568	26.1333	1	0	1	0	0	0	0	0
1569	26.15	1	0	1	0	0	0	0	0
1570	26.1667	0	0	1	0	0	0	0	0
1571	26.1833	0	0	1	0	0	0	0	0
1572	26.2	0	0	1	0	0	0	0	0
1573	26.2167	0	0	1	0	0	0	0	0
1574	26.2333	0	0	1	0	0	0	0	0
1575	26.25	0	0	1	0	0	0	0	0
1576	26.2667	0	0	1	0	0	0	0	0
1577	26.2833	0	0	1	0	0	0	0	0
1578	26.3	0	0	1	0	0	0	0	0
1579	26.3167	0	0	0	0	0	0	0	0
1580	26.3333	0	0	0	0	0	0	0	0
1581	26.35	0	0	0	0	0	0	0	0
1582	26.3667	0	0	0	0	0	0	0	0
1583	26.3833	0	0	0	0	0	0	0	0
1584	26.4	0	0	0	0	0	0	0	0
1585	26.4167	0	0	0	0	0	0	0	0
1586	26.4333	1	0	0	0	0	0	0	0
1587	26.45	1	0	0	0	0	0	0	0
1588	26.4667	1	0	0	0	0	0	0	0
1589	26.4833	1	0	0	0	0	0	0	0
1590	26.5	0	0	0	0	0	0	0	0
1591	26.5167	0	0	0	0	0	0	0	0
1592	26.5333	1	0	0	0	0	0	0	0
1593	26.55	1	0	0	0	0	0	0	0
1594	26.5667	1	0	0	0	0	0	0	0
1595	26.5833	1	0	0	0	0	0	0	0
1596	26.6	1	0	0	0	0	0	0	0
1597	26.6167	1	0	0	0	0	0	0	0
1598	26.6333	1	0	0	0	0	0	0	0
1599	26.65	1	0	0	0	0	0	0	0
1600	26.6667	1	0	0	0	0	0	0	0
1601	26.6833	1	0	0	0	0	0	0	0
1602	26.7	1	0	0	0	0	0	0	0
1603	26.7167	1	0	0	0	0	0	0	0
1604	26.7333	1	0	0	0	0	0	0	0
1605	26.75	1	0	0	0	0	0	0	0
1606	26.7667	1	0	0	0	0	0	0	0
1607	26.7833	1	0	0	0	0	0	0	0
1608	26.8	1	0	0	0	0	0	0	0
1609	26.8167	1	0	0	0	0	0	0	0
1610	26.8333	1	0	0	0	0	0	0	0
1611	26.85	1	0	0	0	0	0	0	0
1612	26.8667	1	0	0	0	0	0	0	0
1613	26.8833	1	0	0	0	0	0	0	0
1614	26.9	1	0	0	0	0	0	0	0
1615	26.9167	1	0	0	0	0	0	0	0
1616	26.9333	1	0	0	0	0	0	0	0
1617	26.95	1	0	0	0	0	0	0	0
1618	26.9667	1	0	0	0	0	0	0	0
1619	26.9833	1	0	0	0	0	0	0	0
1620	27	1	0	0	0	0	0	0	0
1621	27.0167	1	0	0	0	0	0	0	0
1622	27.0333	1	0	0	0	0	0	0	0
1623	27.05	1	0	0	0	0	0	0	0
1624	27.0667	1	0	0	0	0	0	0	0
1625	27.0833	1	0	0	0	0	0	0	0
1626	27.1	1	0	0	0	0	0	0	0
1627	27.1167	2	0	0	0	0	0	0	0
1628	27.1333	1	0	0	0	0	0	0	0
1629	27.15	1	0	0	0	0	0	0	0
1630	27.1667	1	0	0	0	0	0	0	0
1631	27.1833	1	0	0	0	0	0	0	0
1632	27.2	1	0	0	0	0	0	0	0
1633	27.2167	1	0	0	0	0	0	0	0
1634	27.2333	1	0	0	0	0	0	0	0
1635	27.25	1	0	0	0	0	0	0	0
1636	27.2667	2	0	0	0	0	0	0	0
1637	27.2833	2	0	0	0	0	0	0	0
1638	27.3	1	0	0	0	0	0	0	0
1639	27.3167	1	0	0	0	0	0	0	0
1640	27.3333	0	0	0	0	0	0	0	0
1641	27.35	0	0	0	0	0	0	0	0
1642	27.3667	0	0	0	0	0	0	0	0
1643	27.3833	0	0	0	0	0	0	0	0
1644	27.4	0	0	0	0	0	0	0	0
1645	27.4167	1	0	0	0	0	0	0	0
1646	27.4333	1	0	0	0	0	0	0	0
1647	27.45	1	0	0	0	0	0	0	0
1648	27.4667	1	0	0	0	0	0	0	0
1649	27.4833	1	0	0	0	0	0	0	0
1650	27.5	1	0	0	0	0	0	0	0
1651	27.5167	1	0	0	0	0	0	0	0
1652	27.5333	1	0	0	0	0	0	0	0
1653	27.55	1	0	0	0	0	0	0	0
1654	27.5667	1	0	0	0	0	0	0	0
1655	27.5833	1	0	0	0	0	0	0	0
1656	27.6	1	0	0	0	0	0	0	0
1657	27.6167	1	0	0	0	0	0	0	0
1658	27.6333	1	0	0	0	0	0	0	0
1659	27.65	1	0	0	0	0	0	0	0
1660	27.6667	1	0	0	0	0	0	0	0
1661	27.6833	1	0	0	0	0	0	0	0
1662	27.7	1	0	0	0	0	0	0	0
1663	27.7167	0	0	0	0	0	0	0	0
1664	27.7333	0	0	0	0	0	0	0	0
1665	27.75	0	0	0	0	0	0	0	0
1666	27.7667	0	0	0	0	0	0	0	0
1667	27.7833	0	0	0	0	0	0	0	0
1668	27.8	0	0	0	0	0	0	0	0
1669	27.8167	0	0	0	0	0	0	0	0
1670	27.8333	0	0	0	0	0	0	0	0
1671	27.85	0	0	0	0	0	0	0	0
1672	27.8667	0	0	0	0	0	0	0	0
1673	27.8833	0	0	0	0	0	0	0	0
1674	27.9	0	0	0	0	0	0	0	0
1675	27.9167	1	0	0	0	0	0	0	0
1676	27.9333	1	0	0	0	0	0	0	0
1677	27.95	1	0	0	0	0	0	0	0
1678	27.9667	1	0	0	0	0	0	0	0
1679	27.9833	1	0	0	0	0	0	0	0
1680	28	1	0	0	0	0	0	0	0
1681	28.0167	1	0	0	0	0	0	0	0
1682	28.0333	1	0	0	0	0	0	0	0
1683	28.05	1	0	0	0	0	0	0	0
1684	28.0667	1	0	0	0	0	0	0	0
1685	28.0833	1	0	1	0	0	0	0	0
1686	28.1	1	0	1	0	0	0	0	0
1687	28.1167	1	0	1	0	0	0	0	0
1688	28.1333	1	0	1	0	0	0	0	0
1689	28.15	1	0	0	0	0	0	0	0
1690	28.1667	1	0	0	0	0	0	0	0
1691	28.1833	1	0	0	0	0	0	0	0
1692	28.2	1	0	0	0	0	0	0	0
1693	28.2167	1	0	0	0	0	0	0	0
1694	28.2333	1	0	0	0	0	0	0	0
1695	28.25	1	0	0	0	0	0	0	0
1696	28.2667	2	0	0	0	0	0	0	0
1697	28.2833	2	0	0	0	0	0	0	0
1698	28.3	2	0	0	0	0	0	0	0
1699	28.3167	2	0	0	0	0	0	0	0
1700	28.3333	2	0	0	0	0	0	0	0
1701	28.35	2	0	0	0	0	0	0	0
1702	28.3667	2	0	0	0	0	0	0	0
1703	28.3833	2	0	0	0	0	0	0	0
1704	28.4	2	0	0	0	0	0	0	0
1705	28.4167	2	0	0	0	0	0	0	0
1706	28.4333	1	0	0	0	0	0	0	0
1707	28.45	1	0	0	0	0	0	0	0
1708	28.4667	1	0	0	0	0	0	0	0
1709	28.4833	1	0	0	0	0	0	0	0
1710	28.5	1	0	0	0	0	0	0	0
1711	28.5167	1	0	0	0	0	0	0	0
1712	28.5333	1	0	0	0	0	0	0	0
1713	28.55	1	0	0	0	0	0	0	0
1714	28.5667	1	0	0	0	0	0	0	0
1715	28.5833	0	0	0	0	0	0	0	0
1716	28.6	0	0	0	0	0	0	0	0
1717	28.6167	0	0	0	0	0	0	0	0
1718	28.6333	0	0	0	0	0	0	0	0
1719	28.65	0	0	0	0	0	0	0	0
1720	28.6667	0	0	0	0	0	0	0	0
1721	28.6833	0	0	0	0	0	0	0	0
1722	28.7	0	0	0	0	0	0	0	0
1723	28.7167	1	0	0	0	0	0	0	0
1724	28.7333	1	0	0	0	0	0	0	0
1725	28.75	1	0	0	0	0	0	0	0
1726	28.7667	1	0	0	0	0	0	0	0
1727	28.7833	1	0	0	0	0	0	0	0
1728	28.8	0	0	0	0	0	0	0	0
1729	28.8167	0	0	0	0	0	0	0	0
1730	28.8333	0	0	0	0	0	0	0	0
1731	28.85	0	0	0	0	0	0	0	0
1732	28.8667	0	0	0	0	0	0	0	0
1733	28.8833	0	0	0	0	0	0	0	0
1734	28.9	0	0	0	0	0	0	0	0
1735	28.9167	0	0	0	0	0	0	0	0
1736	28.9333	0	0	0	0	0	0	0	0
1737	28.95	0	0	0	0	0	0	0	0
1738	28.9667	0	0	0	0	0	0	0	0
1739	28.9833	0	0	0	0	0	0	0	0
1740	29	0	0	0	0	0	0	0	0
1741	29.0167	0	0	0	0	0	0	0	0
1742	29.0333	0	0	0	0	0	0	0	0
1743	29.05	0	0	0	0	0	0	0	0
1744	29.0667	0	0	0	0	0	0	0	0
1745	29.0833	0	0	0	0	0	0	0	0
1746	29.1	0	0	0	0	0	0	0	0
1747	29.1167	0	0	0	0	0	0	0	0
1748	29.1333	0	0	0	0	0	0	0	0
1749	29.15	0	0	0	0	0	0	0	0
1750	29.1667	0	0	0	0	0	0	0	0
1751	29.1833	0	0	0	0	0	0	0	0
1752	29.2	0	0	0	0	0	0	0	0
1753	29.2167	0	0	0	0	0	0	0	0
1754	29.2333	0	0	0	0	0	0	0	0
1755	29.25	0	0	0	0	0	0	0	0
1756	29.2667	0	0	0	0	0	0	0	0
1757	29.2833	0	0	0	0	0	0	0	0
1758	29.3	0	0	0	0	0	0	0	0
1759	29.3167	0	0	0	0	0	0	0	0
1760	29.3333	0	0	0	0	0	0	0	0
1761	29.35	0	0	0	0	0	0	0	0
1762	29.3667	0	0	0	0	0	0	0	0
1763	29.3833	0	0	0	0	0	0	0	0
1764	29.4	0	0	0	0	0	0	0	0
1765	29.4167	0	0	0	0	0	0	0	0
1766	29.4333	0	0	0	0	0	0	0	0
1767	29.45	0	0	0	0	0	0	0	0
1768	29.4667	1	0	0	0	0	0	0	0
1769	29.4833	1	0	0	0	0	0	0	0
1770	29.5	0	0	0	0	0	0	0	0
1771	29.5167	0	0	0	0	0	0	0	0
1772	29.5333	1	0	0	0	0	0	0	0
1773	29.55	1	0	0	0	0	0	0	0
1774	29.5667	1	0	0	0	0	0	0	0
1775	29.5833	1	0	0	0	0	0	0	0
1776	29.6	1	0	0	0	0	0	0	0
1777	29.6167	1	0	0	0	0	0	0	0
1778	29.6333	1	0	0	0	0	0	0	0
1779	29.65	1	0	0	0	0	0	0	0
1780	29.6667	1	0	0	0	0	0	0	0
1781	29.6833	0	0	0	0	0	0	0	0
1782	29.7	0	0	0	0	0	0	0	0
1783	29.7167	0	0	0	0	0	0	0	0
1784	29.7333	0	0	0	0	0	0	0	0
1785	29.75	0	0	0	0	0	0	0	0
1786	29.7667	0	0	1	0	0	0	0	0
1787	29.7833	0	0	1	0	0	0	0	0
1788	29.8	0	0	1	0	0	0	0	0
1789	29.8167	0	0	2	0	0	0	0	0
1790	29.8333	0	0	2	0	0	0	0	0
1791	29.85	0	0	2	0	0	0	0	0
1792	29.8667	0	0	2	0	0	0	0	0
1793	29.8833	0	0	2	0	0	0	0	0
1794	29.9	0	0	0	0	0	0	0	0
1795	29.9167	0	0	0	0	0	0	0	0
1796	29.9333	0	0	0	0	0	0	0	0
1797	29.95	0	0	0	0	0	0	0	0
1798	29.9667	0	0	0	0	0	0	0	0
1799	29.9833	0	0	0	0	0	0	0	0
1800	30	0	0	0	0	0	0	0	0
1801	30.0167	0	0	0	0	0	0	0	0
1802	30.0333	0	0	0	0	0	0	0	0
1803	30.05	0	0	0	0	0	0	0	0
1804	30.0667	0	0	0	0	0	0	0	0
1805	30.0833	0	0	0	0	0	0	0	0
1806	30.1	0	0	0	0	0	0	0	0
1807	30.1167	0	0	0	0	0	0	0	0
1808	30.1333	0	0	0	0	0	0	0	0
1809	30.15	0	0	0	0	0	0	0	0
1810	30.1667	0	0	0	0	0	0	0	0
1811	30.1833	0	0	0	0	0	0	0	0
1812	30.2	0	0	0	0	0	0	0	0
1813	30.2167	0	0	0	0	0	0	0	0
1814	30.2333	0	0	0	0	0	0	0	0
1815	30.25	0	0	0	0	0	0	0	0
1816	30.2667	0	0	0	0	0	0	0	0
1817	30.2833	1	0	0	0	0	0	0	0
1818	30.3	1	0	0	0	0	0	0	0
1819	30.3167	2	0	0	0	0	0	0	0
1820	30.3333	2	0	0	0	0	0	0	0
1821	30.35	2	0	0	0	0	0	0	0
1822	30.3667	2	0	0	0	0	0	0	0
1823	30.3833	2	0	0	0	0	0	0	0
1824	30.4	2	0	0	0	0	0	0	0
1825	30.4167	2	0	0	0	0	0	0	0
1826	30.4333	2	0	0	0	0	0	0	0
1827	30.45	2	0	0	0	0	0	0	0
1828	30.4667	2	0	0	0	0	0	0	0
1829	30.4833	1	0	0	0	0	0	0	0
1830	30.5	1	0	0	0	0	0	0	0
1831	30.5167	1	0	0	0	0	0	0	0
1832	30.5333	0	0	0	0	0	0	0	0
1833	30.55	0	0	0	0	0	0	0	0
1834	30.5667	0	0	0	0	0	0	0	0
1835	30.5833	0	0	0	0	0	0	0	0
1836	30.6	0	0	0	0	0	0	0	0
1837	30.6167	0	0	0	0	0	0	0	0
1838	30.6333	0	0	0	0	0	0	0	0
1839	30.65	0	0	0	0	0	0	0	0
1840	30.6667	0	0	0	0	0	0	0	0
1841	30.6833	0	0	0	0	0	0	0	0
1842	30.7	0	0	0	0	0	0	0	0
1843	30.7167	0	0	0	0	0	0	0	0
1844	30.7333	0	0	0	0	0	0	0	0
1845	30.75	0	0	0	0	0	0	0	0
1846	30.7667	0	0	0	0	0	0	0	0
1847	30.7833	0	0	0	0	0	0	0	0
1848	30.8	0	0	0	0	0	0	0	0
1849	30.8167	0	0	0	0	0	0	0	0
1850	30.8333	0	0	0	0	0	0	0	0
1851	30.85	0	0	0	0	0	0	0	0
1852	30.8667	0	0	0	0	0	0	0	0
1853	30.8833	0	0	0	0	0	0	0	0
1854	30.9	0	0	0	0	0	0	0	0
1855	30.9167	0	0	0	0	0	0	0	0
1856	30.9333	1	0	0	0	0	0	0	0
1857	30.95	1	0	0	0	0	0	0	0
1858	30.9667	1	0	0	0	0	0	0	0
1859	30.9833	0	0	0	0	0	0	0	0
1860	31	0	0	0	0	0	0	0	0
1861	31.0167	0	0	0	0	0	0	0	0
1862	31.0333	0	0	0	0	0	0	0	0
1863	31.05	0	0	0	0	0	0	0	0
1864	31.0667	1	0	0	0	0	0	0	0
1865	31.0833	1	0	0	0	0	0	0	0
1866	31.1	1	0	0	0	0	0	0	0
1867	31.1167	1	0	0	0	0	0	0	0
1868	31.1333	1	0	0	0	0	0	0	0
1869	31.15	1	0	0	0	0	0	0	0
1870	31.1667	1	0	0	0	0	0	0	0
1871	31.1833	1	0	0	0	0	0	0	0
1872	31.2	1	0	0	0	0	0	0	0
1873	31.2167	1	0	0	0	0	0	0	0
1874	31.2333	1	0	0	0	0	0	0	0
1875	31.25	1	0	0	0	0	0	0	0
1876	31.2667	1	0	0	0	0	0	0	0
1877	31.2833	0	0	0	0	0	0	0	0
1878	31.3	0	0	0	0	0	0	0	0
1879	31.3167	0	0	0	0	0	0	0	0
1880	31.3333	0	0	0	0	0	0	0	0
1881	31.35	0	0	0	0	0	0	0	0
1882	31.3667	0	0	0	0	0	0	0	0
1883	31.3833	0	0	0	0	0	0	0	0
1884	31.4	0	0	0	0	0	0	0	0
1885	31.4167	0	0	0	0	0	0	0	0
1886	31.4333	0	0	0	0	0	0	0	0
1887	31.45	0	0	0	0	0	0	0	0
1888	31.4667	0	0	0	0	0	0	0	0
1889	31.4833	0	0	0	0	0	0	0	0
1890	31.5	0	0	0	0	0	0	0	0
1891	31.5167	1	0	0	0	0	0	0	0
1892	31.5333	1	0	0	0	0	0	0	0
1893	31.55	1	0	0	0	0	0	0	0
1894	31.5667	1	0	0	0	0	0	0	0
1895	31.5833	1	0	0	0	0	0	0	0
1896	31.6	1	0	0	0	0	0	0	0
1897	31.6167	1	0	0	0	0	0	0	0
1898	31.6333	1	0	0	0	0	0	0	0
1899	31.65	1	0	0	0	0	0	0	0
1900	31.6667	1	0	0	0	0	0	0	0
1901	31.6833	1	0	0	0	0	0	0	0
1902	31.7	1	0	0	0	0	0	0	0
1903	31.7167	1	0	0	0	0	0	0	0
1904	31.7333	1	0	0	0	0	0	0	0
1905	31.75	1	0	0	0	0	0	0	0
1906	31.7667	1	0	0	0	0	0	0	0
1907	31.7833	1	0	0	0	0	0	0	0
1908	31.8	1	0	0	0	0	0	0	0
1909	31.8167	1	0	0	0	0	0	0	0
1910	31.8333	1	0	0	0	0	0	0	0
1911	31.85	1	0	0	0	0	0	0	0
1912	31.8667	1	0	0	0	0	0	0	0
1913	31.8833	1	0	0	0	0	0	0	0
1914	31.9	1	0	0	0	0	0	0	0
1915	31.9167	1	0	0	0	0	0	0	0
1916	31.9333	2	0	0	0	0	0	0	0
1917	31.95	2	0	0	0	0	0	0	0
1918	31.9667	2	0	0	0	0	0	0	0
1919	31.9833	2	0	0	0	0	0	0	0
1920	32	2	0	0	0	0	0	0	0
1921	32.0167	2	0	0	0	0	0	0	0
1922	32.0333	2	0	0	0	0	0	0	0
1923	32.05	2	0	0	0	0	0	0	0
1924	32.0667	1	0	0	0	0	0	0	0
1925	32.0833	1	0	0	0	0	0	0	0
1926	32.1	1	0	0	0	0	0	0	0
1927	32.1167	1	0	0	0	0	0	0	0
1928	32.1333	1	0	0	0	0	0	0	0
1929	32.15	1	0	0	0	0	0	0	0
1930	32.1667	1	0	0	0	0	0	0	0
1931	32.1833	1	0	0	0	0	0	0	0
1932	32.2	1	0	0	0	0	0	0	0
1933	32.2167	1	0	0	0	0	0	0	0
1934	32.2333	1	0	0	0	0	0	0	0
1935	32.25	1	0	0	0	0	0	0	0
1936	32.2667	1	0	0	0	3	0	0	0
1937	32.2833	2	0	0	0	3	0	0	0
1938	32.3	2	0	0	0	3	0	0	0
1939	32.3167	2	0	0	0	3	0	0	0
1940	32.3333	2	0	0	0	3	0	0	0
1941	32.35	2	0	0	0	3	0	0	0
1942	32.3667	2	0	0	0	3	0	0	0
1943	32.3833	2	0	0	0	3	0	0	0
1944	32.4	2	0	0	0	3	0	0	0
1945	32.4167	2	0	0	0	3	0	0	0
1946	32.4333	2	0	0	0	4	0	0	0
1947	32.45	2	0	0	0	4	0	0	0
1948	32.4667	2	0	0	0	4	0	0	0
1949	32.4833	1	0	0	0	4	0	0	0
1950	32.5	1	0	0	0	4	0	0	0
1951	32.5167	1	0	0	0	4	0	0	0
1952	32.5333	2	0	0	0	4	0	0	0
1953	32.55	2	0	0	0	4	0	0	0
1954	32.5667	2	0	0	0	4	0	0	0
1955	32.5833	1	0	0	0	4	0	0	0
1956	32.6	1	0	0	0	4	0	0	0
1957	32.6167	1	0	0	0	3	0	0	0
1958	32.6333	1	0	0	0	3	0	0	0
1959	32.65	1	0	0	0	3	0	0	0
1960	32.6667	1	0	0	0	3	0	0	0
1961	32.6833	1	0	0	0	3	0	0	0
1962	32.7	1	0	0	0	3	0	0	0
1963	32.7167	1	0	0	0	3	0	0	0
1964	32.7333	1	0	0	0	3	0	0	0
1965	32.75	1	0	0	0	3	0	0	0
1966	32.7667	1	0	0	0	3	0	0	0
1967	32.7833	1	0	0	0	3	0	0	0
1968	32.8	1	0	0	0	3	0	0	0
1969	32.8167	1	0	0	0	3	0	0	0
1970	32.8333	1	0	0	0	3	0	0	0
1971	32.85	1	0	0	0	3	0	0	0
1972	32.8667	1	0	0	0	3	0	0	0
1973	32.8833	1	0	0	0	3	0	0	0
1974	32.9	1	0	0	0	3	0	0	0
1975	32.9167	1	0	0	0	3	0	0	0
1976	32.9333	1	0	0	0	3	0	0	0
1977	32.95	0	0	0	0	3	0	0	0
1978	32.9667	2	0	0	0	3	0	0	0
1979	32.9833	2	0	0	0	3	0	0	0
1980	33	2	0	0	0	3	0	0	0
1981	33.0167	2	0	0	0	3	0	0	0
1982	33.0333	2	0	0	0	3	0	0	0
1983	33.05	2	0	0	0	3	0	0	0
1984	33.0667	0	0	0	0	2	0	0	0
1985	33.0833	0	0	0	0	2	0	0	0
1986	33.1	0	0	0	0	2	0	0	0
1987	33.1167	0	0	0	0	2	0	0	0
1988	33.1333	0	0	0	0	2	0	0	0
1989	33.15	0	0	0	0	2	0	0	0
1990	33.1667	0	0	0	0	2	0	0	0
1991	33.1833	0	0	0	0	2	0	0	0
1992	33.2	0	0	0	0	2	0	0	0
1993	33.2167	0	0	0	0	2	0	0	0
1994	33.2333	0	0	0	0	2	0	0	0
1995	33.25	0	0	0	0	2	0	0	0
1996	33.2667	0	0	0	0	2	0	0	0
1997	33.2833	0	0	0	0	2	0	0	0
1998	33.3	0	0	0	0	2	0	0	0
1999	33.3167	0	0	0	0	2	0	0	0
2000	33.3333	0	0	0	0	2	0	0	0
2001	33.35	0	0	0	0	2	0	0	0
2002	33.3667	0	0	0	0	2	0	0	0
2003	33.3833	0	0	0	0	2	0	0	0
2004	33.4	0	0	0	0	2	0	0	0
2005	33.4167	0	0	0	0	2	0	0	0
2006	33.4333	0	0	0	0	2	0	0	0
2007	33.45	0	0	0	0	2	0	0	0
2008	33.4667	0	0	0	0	2	0	0	0
2009	33.4833	0	0	0	0	2	0	0	0
2010	33.5	0	0	0	0	2	0	0	0
2011	33.5167	0	0	0	0	2	0	0	0
2012	33.5333	0	0	0	0	2	0	0	0
2013	33.55	0	0	0	0	2	0	0	0
2014	33.5667	0	0	0	0	2	0	0	0
2015	33.5833	0	0	0	0	2	0	0	0
2016	33.6	0	0	0	0	2	0	0	0
2017	33.6167	0	0	0	0	2	0	0	0
2018	33.6333	0	0	0	0	2	0	0	0
2019	33.65	0	0	0	0	2	0	0	0
2020	33.6667	0	0	0	0	2	0	0	0
2021	33.6833	0	0	0	0	2	0	0	0
2022	33.7	0	0	0	0	2	0	0	0
2023	33.7167	0	0	0	0	2	0	0	0
2024	33.7333	0	0	0	0	2	0	0	0
2025	33.75	0	0	0	0	2	0	0	0
2026	33.7667	0	0	0	0	2	0	0	0
2027	33.7833	0	0	0	0	2	0	0	0
2028	33.8	0	0	0	0	2	0	0	0
2029	33.8167	1	0	0	0	2	0	0	0
2030	33.8333	1	0	0	0	2	0	0	0
2031	33.85	0	0	0	0	2	0	0	0
2032	33.8667	0	0	0	0	3	0	0	0
2033	33.8833	0	0	0	0	3	0	0	0
2034	33.9	0	0	0	0	3	0	0	0
2035	33.9167	0	0	0	0	3	0	0	0
2036	33.9333	0	0	0	0	3	0	0	0
2037	33.95	0	0	0	0	3	0	0	0
2038	33.9667	0	0	0	0	3	0	0	0
2039	33.9833	0	0	0	0	3	0	0	0
2040	34	0	0	0	0	3	0	0	0
2041	34.0167	0	0	0	0	3	0	0	0
2042	34.0333	0	0	0	0	3	0	0	0
2043	34.05	0	0	0	0	3	0	0	0
2044	34.0667	0	0	0	0	3	0	0	0
2045	34.0833	0	0	0	0	3	0	0	0
2046	34.1	0	0	0	0	3	0	0	0
2047	34.1167	0	0	0	0	3	0	0	0
2048	34.1333	0	0	0	0	3	0	0	0
2049	34.15	0	0	0	0	3	0	0	0
2050	34.1667	0	0	0	0	3	0	0	0
2051	34.1833	0	0	0	0	3	0	0	0
2052	34.2	0	0	0	0	3	0	0	0
2053	34.2167	0	0	0	0	3	0	0	0
2054	34.2333	0	0	0	0	3	0	0	0
2055	34.25	0	0	0	0	3	0	0	0
2056	34.2667	0	0	0	0	0	0	0	0
2057	34.2833	0	0	0	0	0	0	0	0
2058	34.3	0	0	0	0	0	0	0	0
2059	34.3167	0	0	0	0	0	0	0	0
2060	34.3333	0	0	0	0	0	0	0	0
2061	34.35	0	0	0	0	0	0	0	0
2062	34.3667	0	0	0	0	0	0	0	0
2063	34.3833	0	0	0	0	0	0	0	0
2064	34.4	0	0	0	0	0	0	0	0
2065	34.4167	0	0	0	0	0	0	0	0
2066	34.4333	0	0	0	0	0	0	0	0
2067	34.45	0	0	0	0	0	0	0	0
2068	34.4667	0	0	0	0	0	0	0	0
2069	34.4833	0	0	0	0	0	0	0	0
2070	34.5	0	0	0	0	0	0	0	0
2071	34.5167	1	0	0	0	0	0	0	0
2072	34.5333	1	0	0	0	0	0	0	0
2073	34.55	1	0	0	0	0	0	0	0
2074	34.5667	1	0	0	0	0	0	0	0
2075	34.5833	1	0	0	0	0	0	0	0
2076	34.6	0	0	0	0	0	0	0	0
2077	34.6167	0	0	0	0	0	0	0	0
2078	34.6333	0	0	0	0	0	0	0	0
2079	34.65	0	0	0	0	0	0	0	0
2080	34.6667	0	0	0	0	0	0	0	0
2081	34.6833	0	0	0	0	0	0	0	0
2082	34.7	0	0	0	0	0	0	0	0
2083	34.7167	1	0	0	0	0	0	0	0
2084	34.7333	1	0	0	0	0	0	0	0
2085	34.75	1	0	0	0	0	0	0	0
2086	34.7667	1	0	0	0	0	0	0	0
2087	34.7833	1	0	0	0	0	0	0	0
2088	34.8	1	0	0	0	0	0	0	0
2089	34.8167	2	0	0	0	0	0	0	0
2090	34.8333	2	0	0	0	0	0	0	0
2091	34.85	2	0	0	0	0	0	0	0
2092	34.8667	2	0	0	0	0	0	0	0
2093	34.8833	2	0	0	0	0	0	0	0
2094	34.9	2	0	0	0	0	0	0	0
2095	34.9167	3	0	0	0	0	0	0	0
2096	34.9333	4	0	0	0	0	0	0	0
2097	34.95	4	0	0	0	0	0	0	0
2098	34.9667	3	0	0	0	0	0	0	0
2099	34.9833	3	0	0	0	0	0	0	0
2100	35	3	0	0	0	0	0	0	0
2101	35.0167	3	0	0	0	0	0	0	0
2102	35.0333	3	0	0	0	0	0	0	0
2103	35.05	3	0	0	0	0	0	0	0
2104	35.0667	2	0	0	0	0	0	0	0
2105	35.0833	2	0	0	0	0	0	0	0
2106	35.1	2	0	0	0	0	0	0	0
2107	35.1167	2	0	0	0	0	0	0	0
2108	35.1333	2	0	0	0	0	0	0	0
2109	35.15	2	0	0	0	0	0	0	0
2110	35.1667	2	0	0	0	0	0	0	0
2111	35.1833	2	0	0	0	0	0	0	0
2112	35.2	2	0	0	0	0	0	0	0
2113	35.2167	2	0	0	0	0	0	0	0
2114	35.2333	2	0	0	0	0	0	0	0
2115	35.25	2	0	0	0	0	0	0	0
2116	35.2667	2	0	0	0	0	0	0	0
2117	35.2833	2	0	0	0	0	0	0	0
2118	35.3	2	0	0	0	0	0	0	0
2119	35.3167	1	0	0	0	0	0	0	0
2120	35.3333	1	0	0	0	0	0	0	0
2121	35.35	1	0	0	0	0	0	0	0
2122	35.3667	0	0	0	0	0	0	0	0
2123	35.3833	0	0	0	0	0	0	0	0
2124	35.4	0	0	0	0	0	0	0	0
2125	35.4167	1	0	0	0	0	0	0	0
2126	35.4333	1	0	0	0	0	0	0	0
2127	35.45	0	0	0	0	0	0	0	0
2128	35.4667	1	0	0	0	0	0	0	0
2129	35.4833	1	0	0	0	0	0	0	0
2130	35.5	1	0	0	0	0	0	0	0
2131	35.5167	2	0	0	0	0	0	0	0
2132	35.5333	2	0	0	0	0	0	0	0
2133	35.55	2	0	0	0	0	0	0	0
2134	35.5667	2	0	0	0	0	0	0	0
2135	35.5833	2	0	0	0	0	0	0	0
2136	35.6	1	0	0	0	0	0	0	0
2137	35.6167	1	0	0	0	0	0	0	0
2138	35.6333	1	0	0	0	0	0	0	0
2139	35.65	1	0	0	0	0	0	0	0
2140	35.6667	1	0	0	0	0	0	0	0
2141	35.6833	1	0	0	0	0	0	0	0
2142	35.7	1	0	0	0	0	0	0	0
2143	35.7167	1	0	0	0	0	0	0	0
2144	35.7333	2	0	0	0	0	0	0	0
2145	35.75	2	0	0	0	0	0	0	0
2146	35.7667	2	0	0	0	0	0	0	0
2147	35.7833	2	0	0	0	0	0	0	0
2148	35.8	2	0	0	0	0	0	0	0
2149	35.8167	2	0	0	0	0	0	0	0
2150	35.8333	2	0	0	0	0	0	0	0
2151	35.85	2	0	0	0	0	0	0	0
2152	35.8667	2	0	0	0	0	0	0	0
2153	35.8833	2	0	0	0	0	0	0	0
2154	35.9	2	0	0	0	0	0	0	0
2155	35.9167	2	0	0	0	0	0	0	0
2156	35.9333	2	0	0	0	0	0	0	0
2157	35.95	2	0	0	0	0	0	0	0
2158	35.9667	2	0	0	0	0	0	0	0
2159	35.9833	2	0	0	0	0	0	0	0
2160	36	2	0	0	0	0	0	0	0
2161	36.0167	2	0	0	0	0	0	0	0
2162	36.0333	1	0	0	0	0	0	0	0
2163	36.05	1	0	0	0	0	0	0	0
2164	36.0667	1	0	0	0	0	0	0	0
2165	36.0833	2	0	0	0	0	0	0	0
2166	36.1	2	0	0	0	0	0	0	0
2167	36.1167	1	0	0	0	0	0	0	0
2168	36.1333	1	0	0	0	0	0	0	0
2169	36.15	1	0	0	0	0	0	0	0
2170	36.1667	1	0	0	0	0	0	0	0
2171	36.1833	1	0	0	0	0	0	0	0
2172	36.2	1	0	0	0	0	0	0	0
2173	36.2167	1	0	0	0	0	0	0	0
2174	36.2333	1	0	0	0	0	0	0	0
2175	36.25	1	0	0	0	0	0	0	0
2176	36.2667	1	0	0	0	0	0	0	0
2177	36.2833	1	0	0	0	0	0	0	0
2178	36.3	1	0	0	0	0	0	0	0
2179	36.3167	1	0	0	0	0	0	0	0
2180	36.3333	1	0	0	0	0	0	0	0
2181	36.35	1	0	0	0	0	0	0	0
2182	36.3667	1	0	0	0	0	0	0	0
2183	36.3833	1	0	0	0	0	0	0	0
2184	36.4	1	0	0	0	0	0	0	0
2185	36.4167	1	0	0	0	0	0	0	0
2186	36.4333	1	0	0	0	0	0	0	0
2187	36.45	1	0	0	0	0	0	0	0
2188	36.4667	1	0	0	0	0	0	0	0
2189	36.4833	1	0	0	0	0	0	0	0
2190	36.5	1	0	0	0	0	0	0	0
2191	36.5167	1	0	0	0	0	0	0	0
2192	36.5333	1	0	0	0	0	0	0	0
2193	36.55	1	0	0	0	0	0	0	0
2194	36.5667	1	0	0	0	0	0	0	0
2195	36.5833	1	0	0	0	0	0	0	0
2196	36.6	1	0	0	0	0	0	0	0
2197	36.6167	1	0	0	0	0	0	0	0
2198	36.6333	1	0	0	0	0	0	0	0
2199	36.65	1	0	0	0	0	0	0	0
2200	36.6667	1	0	0	0	0	0	0	0
2201	36.6833	1	0	0	0	0	0	0	0
2202	36.7	1	0	0	0	0	0	0	0
2203	36.7167	2	0	0	0	0	0	0	0
2204	36.7333	2	0	0	0	0	0	0	0
2205	36.75	0	0	0	0	0	0	0	0
2206	36.7667	1	0	0	0	0	0	0	0
2207	36.7833	1	0	0	0	0	0	0	0
2208	36.8	1	0	0	0	0	0	0	0
2209	36.8167	1	0	0	0	0	0	0	0
2210	36.8333	1	0	0	0	0	0	0	0
2211	36.85	1	0	0	0	0	0	0	0
2212	36.8667	1	0	0	0	0	0	0	0
2213	36.8833	1	0	0	0	0	0	0	0
2214	36.9	1	0	0	0	0	0	0	0
2215	36.9167	0	0	0	0	0	0	0	0
2216	36.9333	0	0	0	0	0	0	0	0
2217	36.95	0	0	0	0	0	0	0	0
2218	36.9667	0	0	0	0	0	0	0	0
2219	36.9833	0	0	0	0	0	0	0	0
2220	37	0	0	0	0	0	0	0	0
2221	37.0167	0	0	0	0	0	0	0	0
2222	37.0333	0	0	0	0	0	0	0	0
2223	37.05	0	0	0	0	0	0	0	0
2224	37.0667	0	0	0	0	0	0	0	0
2225	37.0833	0	0	0	0	0	0	0	0
2226	37.1	0	0	0	0	0	0	0	0
2227	37.1167	0	0	0	0	0	0	0	0
2228	37.1333	0	0	0	0	0	0	0	0
2229	37.15	0	0	0	0	0	0	0	0
2230	37.1667	0	0	0	0	0	0	0	0
2231	37.1833	0	0	0	0	0	0	0	0
2232	37.2	0	0	0	0	0	0	0	0
2233	37.2167	0	0	0	0	0	0	0	0
2234	37.2333	1	0	0	0	0	0	0	0
2235	37.25	1	0	0	0	0	0	0	0
2236	37.2667	1	0	0	0	0	0	0	0
2237	37.2833	1	0	0	0	0	0	0	0
2238	37.3	1	0	0	0	0	0	0	0
2239	37.3167	1	0	0	0	0	0	0	0
2240	37.3333	1	0	0	0	0	0	0	0
2241	37.35	1	0	0	0	0	0	0	0
2242	37.3667	1	0	0	0	0	0	0	0
2243	37.3833	1	0	0	0	0	0	0	0
2244	37.4	1	0	0	0	0	0	0	0
2245	37.4167	1	0	0	0	0	0	0	0
2246	37.4333	1	0	0	0	0	0	0	0
2247	37.45	1	0	0	0	0	0	0	0
2248	37.4667	1	0	0	0	0	0	0	0
2249	37.4833	0	0	0	0	0	0	0	0
2250	37.5	0	0	0	0	0	0	0	0
2251	37.5167	0	0	0	0	0	0	0	0
2252	37.5333	0	0	0	0	0	0	0	0
2253	37.55	0	0	0	0	0	0	0	0
2254	37.5667	0	0	0	0	0	0	0	0
2255	37.5833	0	0	0	0	0	0	0	0
2256	37.6	0	0	0	0	0	0	0	0
2257	37.6167	0	0	0	0	0	0	0	0
2258	37.6333	0	0	0	0	0	0	0	0
2259	37.65	0	0	0	0	0	0	0	0
2260	37.6667	0	0	0	0	0	0	0	0
2261	37.6833	0	0	0	0	0	0	0	0
2262	37.7	0	0	0	0	0	0	0	0
2263	37.7167	1	0	0	0	0	0	0	0
2264	37.7333	1	0	0	0	0	0	0	0
2265	37.75	1	0	0	0	0	0	0	0
2266	37.7667	1	0	0	0	0	0	0	0
2267	37.7833	1	0	0	0	0	0	0	0
2268	37.8	1	0	0	0	0	0	0	0
2269	37.8167	1	0	0	0	0	0	0	0
2270	37.8333	1	0	0	0	0	0	0	0
2271	37.85	1	0	0	0	0	0	0	0
2272	37.8667	1	0	0	0	0	0	0	0
2273	37.8833	1	0	0	0	0	0	0	0
2274	37.9	0	0	0	0	0	0	0	0
2275	37.9167	0	0	0	0	0	0	0	0
2276	37.9333	0	0	0	0	0	0	0	0
2277	37.95	0	0	0	0	0	0	0	0
2278	37.9667	0	0	0	0	0	0	0	0
2279	37.9833	0	0	0	0	0	0	0	0
2280	38	0	0	0	0	0	0	0	0
2281	38.0167	0	0	0	0	0	0	0	0
2282	38.0333	0	0	0	0	0	0	0	0
2283	38.05	0	0	0	0	0	0	0	0
2284	38.0667	0	0	0	0	0	0	0	0
2285	38.0833	0	0	0	0	0	0	0	0
2286	38.1	0	0	0	0	0	0	0	0
2287	38.1167	0	0	0	0	0	0	0	0
2288	38.1333	0	0	0	0	0	0	0	0
2289	38.15	0	0	0	0	0	0	0	0
2290	38.1667	0	0	0	0	0	0	0	0
2291	38.1833	0	0	0	0	0	0	0	0
2292	38.2	0	0	0	0	0	0	0	0
2293	38.2167	1	0	1	0	0	0	0	0
2294	38.2333	1	0	1	0	0	0	0	0
2295	38.25	1	0	0	0	0	0	0	0
2296	38.2667	1	0	0	0	0	0	0	0
2297	38.2833	1	0	0	0	0	0	0	0
2298	38.3	1	0	0	0	0	0	0	0
2299	38.3167	1	0	0	0	0	0	0	0
2300	38.3333	1	0	0	0	0	0	0	0
2301	38.35	1	0	0	0	0	0	0	0
2302	38.3667	1	0	0	0	0	0	0	0
2303	38.3833	2	0	0	0	0	0	0	0
2304	38.4	2	0	0	0	0	0	0	0
2305	38.4167	2	0	0	0	0	0	0	0
2306	38.4333	2	0	0	0	0	0	0	0
2307	38.45	2	0	0	0	0	0	0	0
2308	38.4667	1	0	0	0	0	0	0	0
2309	38.4833	1	0	0	0	0	0	0	0
2310	38.5	1	0	0	0	0	0	0	0
2311	38.5167	2	0	0	0	0	0	0	0
2312	38.5333	3	0	0	0	0	0	0	0
2313	38.55	2	0	0	0	0	0	0	0
2314	38.5667	2	0	0	0	0	0	0	0
2315	38.5833	2	0	0	0	0	0	0	0
2316	38.6	2	0	0	0	0	0	0	0
2317	38.6167	2	0	0	0	0	0	0	0
2318	38.6333	2	0	0	0	0	0	0	0
2319	38.65	2	0	0	0	0	0	0	0
2320	38.6667	2	0	0	0	0	0	0	0
2321	38.6833	2	0	0	0	0	0	0	0
2322	38.7	2	0	0	0	0	0	0	0
2323	38.7167	3	0	0	0	0	0	0	0
2324	38.7333	3	0	0	0	0	0	0	0
2325	38.75	3	0	0	0	0	0	0	0
2326	38.7667	3	0	0	0	0	0	0	0
2327	38.7833	3	0	0	0	0	0	0	0
2328	38.8	3	0	0	0	0	0	0	0
2329	38.8167	3	0	0	0	0	0	0	0
2330	38.8333	3	0	0	0	0	0	0	0
2331	38.85	3	0	0	0	0	0	0	0
2332	38.8667	3	0	0	0	0	0	0	0
2333	38.8833	3	0	0	0	0	0	0	0
2334	38.9	3	0	0	0	0	0	0	0
2335	38.9167	3	0	0	0	0	0	0	0
2336	38.9333	3	0	0	0	0	0	0	0
2337	38.95	3	0	0	0	0	0	0	0
2338	38.9667	3	0	0	0	0	0	0	0
2339	38.9833	3	0	0	0	0	0	0	0
2340	39	3	0	0	0	0	0	0	0
2341	39.0167	3	0	0	0	0	0	0	0
2342	39.0333	4	0	0	0	0	0	0	0
2343	39.05	4	0	0	0	0	0	0	0
2344	39.0667	4	0	0	0	0	0	0	0
2345	39.0833	4	0	0	0	0	0	0	0
2346	39.1	4	0	0	0	0	0	0	0
2347	39.1167	4	0	0	0	0	0	0	0
2348	39.1333	4	0	0	0	0	0	0	0
2349	39.15	4	0	0	0	0	0	0	0
2350	39.1667	4	0	0	0	0	0	0	0
2351	39.1833	4	0	0	0	0	0	0	0
2352	39.2	4	0	0	0	0	0	0	0
2353	39.2167	4	0	0	0	0	0	0	0
2354	39.2333	4	0	0	0	0	0	0	0
2355	39.25	4	0	0	0	0	0	0	0
2356	39.2667	4	0	0	0	0	0	0	0
2357	39.2833	3	0	0	0	0	0	0	0
2358	39.3	3	0	0	0	0	0	0	0
2359	39.3167	3	0	0	0	0	0	0	0
2360	39.3333	3	0	0	0	0	0	0	0
2361	39.35	3	0	0	0	0	0	0	0
2362	39.3667	2	0	0	0	0	0	0	0
2363	39.3833	2	0	0	0	0	0	0	0
2364	39.4	2	0	0	0	0	0	0	0
2365	39.4167	1	0	0	0	0	0	0	0
2366	39.4333	1	0	0	0	0	0	0	0
2367	39.45	1	0	0	0	0	0	0	0
2368	39.4667	1	0	0	0	0	0	0	0
2369	39.4833	1	0	0	0	0	0	0	0
2370	39.5	1	0	0	0	0	0	0	0
2371	39.5167	2	0	0	0	0	0	0	0
2372	39.5333	2	0	0	0	0	0	0	0
2373	39.55	2	0	0	0	0	0	0	0
2374	39.5667	2	0	0	0	0	0	0	0
2375	39.5833	2	0	0	0	0	0	0	0
2376	39.6	2	0	0	0	0	0	0	0
2377	39.6167	2	0	0	0	0	0	0	0
2378	39.6333	2	0	0	0	0	0	0	0
2379	39.65	2	0	0	0	0	0	0	0
2380	39.6667	2	0	0	0	0	0	0	0
2381	39.6833	2	0	0	0	0	0	0	0
2382	39.7	2	0	0	0	0	0	0	0
2383	39.7167	2	0	0	0	0	0	0	0
2384	39.7333	2	0	0	0	0	0	0	0
2385	39.75	2	0	0	0	0	0	0	0
2386	39.7667	2	0	0	0	0	0	0	0
2387	39.7833	1	0	0	0	0	0	0	0
2388	39.8	1	0	0	0	0	0	0	0
2389	39.8167	1	0	0	0	0	0	0	0
2390	39.8333	1	0	0	0	0	0	0	0
2391	39.85	1	0	0	0	0	0	0	0
2392	39.8667	1	0	0	0	0	0	0	0
2393	39.8833	1	0	0	0	0	0	0	0
2394	39.9	1	0	0	0	0	0	0	0
2395	39.9167	1	0	0	0	0	0	0	0
2396	39.9333	1	0	0	0	0	0	0	0
2397	39.95	1	0	0	0	0	0	0	0
2398	39.9667	1	0	0	0	0	0	0	0
2399	39.9833	1	0	0	0	0	0	0	0
2400	40	1	0	0	0	0	0	0	0
2401	40.0167	1	0	0	0	0	0	0	0
2402	40.0333	1	0	0	0	0	0	0	0
2403	40.05	1	0	0	0	0	0	0	0
2404	40.0667	1	0	0	0	0	0	0	0
2405	40.0833	1	0	0	0	0	0	0	0
2406	40.1	1	0	0	0	0	0	0	0
2407	40.1167	1	0	0	0	0	0	0	0
2408	40.1333	1	0	0	0	0	0	0	0
2409	40.15	1	0	0	0	0	0	0	0
2410	40.1667	1	0	0	0	0	0	0	0
2411	40.1833	1	0	0	0	0	0	0	0
2412	40.2	1	0	0	0	0	0	0	0
2413	40.2167	1	0	0	0	0	0	0	0
2414	40.2333	1	0	0	0	0	0	0	0
2415	40.25	1	0	0	0	0	0	0	0
2416	40.2667	1	0	0	0	0	0	0	0
2417	40.2833	1	0	0	0	0	0	0	0
2418	40.3	1	0	0	0	0	0	0	0
2419	40.3167	1	0	0	0	0	0	0	0
2420	40.3333	1	0	0	0	0	0	0	0
2421	40.35	1	0	0	0	0	0	0	0
2422	40.3667	1	0	0	0	0	0	0	0
2423	40.3833	1	0	0	0	0	0	0	0
2424	40.4	1	0	0	0	0	0	0	0
2425	40.4167	1	0	0	0	0	0	0	0
2426	40.4333	1	0	0	0	0	0	0	0
2427	40.45	1	0	0	0	0	0	0	0
2428	40.4667	1	0	0	0	0	0	0	0
2429	40.4833	1	0	0	0	0	0	0	0
2430	40.5	1	0	0	0	0	0	0	0
2431	40.5167	1	0	0	0	0	0	0	0
2432	40.5333	1	0	0	0	0	0	0	0
2433	40.55	1	0	0	0	0	0	0	0
2434	40.5667	1	0	0	0	0	1	0	0
2435	40.5833	1	0	0	0	0	1	0	0
2436	40.6	1	0	0	0	0	1	0	0
2437	40.6167	1	0	1	0	0	1	0	0
2438	40.6333	1	0	1	0	0	1	0	0
2439	40.65	1	0	1	0	0	1	0	0
2440	40.6667	1	0	1	0	0	1	0	0
2441	40.6833	2	0	1	0	0	0	0	0
2442	40.7	2	0	1	0	0	0	0	0
2443	40.7167	2	0	1	0	0	0	0	0
2444	40.7333	2	0	1	0	0	0	0	0
2445	40.75	2	0	1	0	0	0	0	0
2446	40.7667	2	0	1	0	0	1	0	0
2447	40.7833	2	0	1	0	0	1	0	0
2448	40.8	2	0	1	0	0	1	0	0
2449	40.8167	2	0	1	0	0	0	0	0
2450	40.8333	2	0	1	0	0	0	0	0
2451	40.85	2	0	1	0	0	0	0	0
2452	40.8667	2	0	1	0	0	0	0	0
2453	40.8833	2	0	1	0	0	0	0	0
2454	40.9	1	0	1	0	0	0	0	0
2455	40.9167	1	0	1	0	0	0	0	0
2456	40.9333	0	0	1	0	0	0	0	0
2457	40.95	0	0	1	0	0	0	0	0
2458	40.9667	0	0	1	0	0	0	0	0
2459	40.9833	0	0	1	0	0	0	0	0
2460	41	0	0	1	0	0	0	0	0
2461	41.0167	0	0	1	0	0	0	0	0
2462	41.0333	1	0	1	0	0	0	0	0
2463	41.05	1	0	1	0	0	0	0	0
2464	41.0667	0	0	1	0	0	0	0	0
2465	41.0833	1	0	1	0	0	0	0	0
2466	41.1	1	0	1	0	0	0	0	0
2467	41.1167	0	0	1	0	0	0	0	0
2468	41.1333	0	0	1	0	0	0	0	0
2469	41.15	0	0	1	0	0	0	0	0
2470	41.1667	0	0	1	0	0	0	0	0
2471	41.1833	0	0	1	0	0	0	0	0
2472	41.2	0	0	1	0	0	0	0	0
2473	41.2167	1	0	1	0	0	0	0	0
2474	41.2333	1	0	1	0	0	0	0	0
2475	41.25	0	0	1	0	0	0	0	0
2476	41.2667	0	0	1	0	0	0	0	0
2477	41.2833	0	0	1	0	0	0	0	0
2478	41.3	0	0	1	0	0	0	0	0
2479	41.3167	0	0	1	0	0	0	0	0
2480	41.3333	0	0	1	0	0	0	0	0
2481	41.35	0	0	1	0	0	0	0	0
2482	41.3667	0	0	1	0	0	0	0	0
2483	41.3833	0	0	1	0	0	0	0	0
2484	41.4	0	0	1	0	0	0	0	0
2485	41.4167	0	0	1	0	0	0	0	0
2486	41.4333	0	0	1	0	0	0	0	0
2487	41.45	0	0	1	0	0	0	0	0
2488	41.4667	0	0	1	0	0	0	0	0
2489	41.4833	0	0	1	0	0	0	0	0
2490	41.5	0	0	1	0	0	0	0	0
2491	41.5167	0	0	1	0	0	0	0	0
2492	41.5333	1	0	1	0	0	0	0	0
2493	41.55	1	0	1	0	0	0	0	0
2494	41.5667	1	0	1	0	0	0	0	0
2495	41.5833	0	0	1	0	0	0	0	0
2496	41.6	0	0	1	0	0	0	0	0
2497	41.6167	0	0	1	0	0	0	0	0
2498	41.6333	0	0	0	0	0	0	0	0
2499	41.65	0	0	0	0	0	0	0	0
2500	41.6667	0	0	0	0	0	0	0	0
2501	41.6833	0	0	0	0	0	0	0	0
2502	41.7	0	0	0	0	0	0	0	0
2503	41.7167	0	0	0	0	0	0	0	0
2504	41.7333	0	0	0	0	0	0	0	0
2505	41.75	0	0	0	0	0	0	0	0
2506	41.7667	0	0	0	0	0	0	0	0
2507	41.7833	0	0	0	0	0	0	0	0
2508	41.8	0	0	0	0	0	0	0	0
2509	41.8167	0	0	0	0	0	0	0	0
2510	41.8333	0	0	0	0	0	0	0	0
2511	41.85	0	0	0	0	0	0	0	0
2512	41.8667	0	0	0	0	0	0	0	0
2513	41.8833	0	0	0	0	0	0	0	0
2514	41.9	0	0	0	0	0	0	0	0
2515	41.9167	0	0	0	0	0	0	0	0
2516	41.9333	0	0	0	0	0	0	0	0
2517	41.95	0	0	0	0	0	0	0	0
2518	41.9667	0	0	0	0	0	0	0	0
2519	41.9833	0	0	0	0	0	0	0	0
2520	42	0	0	0	0	0	0	0	0
2521	42.0167	0	0	0	0	0	0	0	0
2522	42.0333	0	0	0	0	0	0	0	0
2523	42.05	0	0	0	0	0	0	0	0
2524	42.0667	0	0	0	0	0	0	0	0
2525	42.0833	0	0	0	0	0	0	0	0
2526	42.1	0	0	0	0	0	0	0	0
2527	42.1167	0	0	0	0	0	0	0	0
2528	42.1333	0	0	0	0	0	0	0	0
2529	42.15	0	0	0	0	0	0	0	0
2530	42.1667	0	0	0	0	0	0	0	0
2531	42.1833	0	0	0	0	0	0	0	0
2532	42.2	0	0	0	0	0	0	0	0
2533	42.2167	0	0	0	0	0	0	0	0
2534	42.2333	0	0	0	0	0	0	0	0
2535	42.25	0	0	0	0	0	0	0	0
2536	42.2667	0	0	0	0	0	0	0	0
2537	42.2833	0	0	0	0	0	0	0	0
2538	42.3	0	0	0	0	0	0	0	0
2539	42.3167	0	0	0	0	0	0	0	0
2540	42.3333	0	0	0	0	0	0	0	0
2541	42.35	0	0	0	0	0	0	0	0
2542	42.3667	0	0	0	0	0	0	0	0
2543	42.3833	0	0	0	0	0	0	0	0
2544	42.4	0	0	0	0	0	0	0	0
2545	42.4167	1	0	0	0	0	0	0	0
2546	42.4333	1	0	0	0	0	0	0	0
2547	42.45	1	0	0	0	0	0	0	0
2548	42.4667	1	0	0	0	0	0	0	0
2549	42.4833	1	0	0	0	0	0	0	0
2550	42.5	1	0	0	0	0	0	0	0
2551	42.5167	1	0	0	0	0	0	0	0
2552	42.5333	1	0	0	0	0	0	0	0
2553	42.55	1	0	0	0	0	0	0	0
2554	42.5667	1	0	0	0	0	0	0	0
2555	42.5833	1	0	0	0	0	0	0	0
2556	42.6	1	0	0	0	0	0	0	0
2557	42.6167	1	0	0	0	0	0	0	0
2558	42.6333	1	0	0	0	0	0	0	0
2559	42.65	1	0	0	0	0	0	0	0
2560	42.6667	1	0	0	0	0	0	0	0
2561	42.6833	1	0	0	0	0	0	0	0
2562	42.7	1	0	0	0	0	0	0	0
2563	42.7167	1	0	0	0	0	0	0	0
2564	42.7333	1	0	0	0	0	0	0	0
2565	42.75	1	0	0	0	0	0	0	0
2566	42.7667	2	0	0	0	0	0	0	0
2567	42.7833	2	0	0	0	0	0	0	0
2568	42.8	2	0	0	0	0	0	0	0
2569	42.8167	2	0	0	0	0	0	0	0
2570	42.8333	2	0	0	0	0	0	0	0
2571	42.85	2	0	0	0	0	0	0	0
2572	42.8667	1	0	0	0	0	0	0	0
2573	42.8833	1	0	0	0	0	0	0	0
2574	42.9	0	0	0	0	0	0	0	0
2575	42.9167	0	0	0	0	0	0	0	0
2576	42.9333	0	0	0	0	0	0	0	0
2577	42.95	0	0	0	0	0	0	0	0
2578	42.9667	0	0	0	0	0	0	0	0
2579	42.9833	0	0	0	0	0	0	0	0
2580	43	0	0	0	0	0	0	0	0
2581	43.0167	0	0	0	0	0	0	0	0
2582	43.0333	0	0	0	0	0	0	0	0
2583	43.05	0	0	0	0	0	0	0	0
2584	43.0667	0	0	0	0	0	0	0	0
2585	43.0833	0	0	0	0	0	0	0	0
2586	43.1	0	0	0	0	0	0	0	0
2587	43.1167	0	0	0	0	0	0	0	0
2588	43.1333	0	0	0	0	0	0	0	0
[truncated: 1,602 more rows]

## Sheet: GP06_2
Seconds	Minutes	Favonigobius exquisitus	Ambassis	Sillago ciliata	Arenigobius bifrenatus	Acanthopagrus australis	Girella tricuspidata	Tylosurus gavialoides	Gerres subfasciatus	Mugil cephalus	Atherinomorus vaigiensis
1	0.0166667	4	0	0	0	0	0	0	0	0	0
2	0.0333333	4	0	0	0	0	0	0	0	0	0
3	0.05	4	0	0	0	0	0	0	0	0	0
4	0.0666667	4	0	0	0	0	0	0	0	0	0
5	0.0833333	4	292	1	0	0	0	0	0	0	0
6	0.1	4	292	1	0	0	0	0	0	0	0
7	0.116667	4	292	1	0	0	0	0	0	0	0
8	0.133333	4	292	1	0	0	0	0	0	0	0
9	0.15	4	292	1	0	0	0	0	0	0	0
10	0.166667	4	292	1	0	0	0	0	0	0	0
11	0.183333	4	292	1	0	0	0	0	0	0	0
12	0.2	4	292	1	0	0	0	0	0	0	0
13	0.216667	4	292	1	0	0	0	0	0	0	0
14	0.233333	4	292	1	0	0	0	0	0	0	0
15	0.25	4	292	1	0	0	0	0	0	0	0
16	0.266667	4	292	1	0	0	0	0	0	0	0
17	0.283333	4	292	1	0	0	0	0	0	0	0
18	0.3	4	292	1	0	0	0	0	0	0	0
19	0.316667	4	292	1	0	0	0	0	0	0	0
20	0.333333	4	0	1	0	0	0	0	0	0	0
21	0.35	4	0	1	0	0	0	0	0	0	0
22	0.366667	4	0	1	0	0	0	0	0	0	0
23	0.383333	4	0	1	0	0	0	0	0	0	0
24	0.4	4	0	1	0	0	0	0	0	0	0
25	0.416667	4	0	0	0	0	0	0	0	0	0
26	0.433333	4	0	0	0	0	0	0	0	0	0
27	0.45	4	0	0	0	0	0	0	0	0	0
28	0.466667	4	0	0	0	0	0	0	0	0	0
29	0.483333	4	0	0	0	0	0	0	0	0	0
30	0.5	4	0	0	0	0	0	0	0	0	0
31	0.516667	4	0	0	0	0	0	0	0	0	0
32	0.533333	4	0	0	0	0	0	0	0	0	0
33	0.55	4	0	0	0	0	0	0	0	0	0
34	0.566667	4	0	0	0	0	0	0	0	0	0
35	0.583333	4	0	0	0	0	0	0	0	0	0
36	0.6	4	0	0	0	0	0	0	0	0	0
37	0.616667	4	0	0	0	0	0	0	0	0	0
38	0.633333	4	0	0	0	0	0	0	0	0	0
39	0.65	4	0	0	0	0	0	0	0	0	0
40	0.666667	4	0	0	0	0	0	0	0	0	0
41	0.683333	4	0	0	0	0	0	0	0	0	0
42	0.7	4	0	0	0	0	0	0	0	0	0
43	0.716667	4	0	0	0	0	0	0	0	0	0
44	0.733333	4	0	0	0	0	0	0	0	0	0
45	0.75	4	0	0	0	0	0	0	0	0	0
46	0.766667	4	0	0	0	0	0	0	0	0	0
47	0.783333	4	0	0	0	0	0	0	0	0	0
48	0.8	4	0	0	0	0	0	0	0	0	0
49	0.816667	4	0	0	0	0	0	0	0	0	0
50	0.833333	4	0	0	0	0	0	0	0	0	0
51	0.85	4	0	0	0	0	0	0	0	0	0
52	0.866667	4	0	0	0	0	0	0	0	0	0
53	0.883333	4	0	0	0	0	0	0	0	0	0
54	0.9	4	0	0	0	0	0	0	0	0	0
55	0.916667	4	0	0	0	0	0	0	0	0	0
56	0.933333	4	0	0	0	0	0	0	0	0	0
57	0.95	4	0	0	0	0	0	0	0	0	0
58	0.966667	4	0	0	0	0	0	0	0	0	0
59	0.983333	4	0	0	0	0	0	0	0	0	0
60	1	4	0	0	0	0	0	0	0	0	0
61	1.01667	4	0	0	0	0	0	0	0	0	0
62	1.03333	4	0	0	0	0	0	0	0	0	0
63	1.05	4	0	0	0	0	0	0	0	0	0
64	1.06667	4	0	0	0	0	0	0	0	0	0
65	1.08333	4	0	0	0	0	0	0	0	0	0
66	1.1	4	0	0	0	0	0	0	0	0	0
67	1.11667	4	0	0	0	0	0	0	0	0	0
68	1.13333	4	0	0	0	0	0	0	0	0	0
69	1.15	4	0	0	0	0	0	0	0	0	0
70	1.16667	4	0	0	0	0	0	0	0	0	0
71	1.18333	4	0	0	0	0	0	0	0	0	0
72	1.2	4	0	0	0	0	0	0	0	0	0
73	1.21667	4	0	0	0	0	0	0	0	0	0
74	1.23333	4	0	0	0	0	0	0	0	0	0
75	1.25	4	0	0	0	0	0	0	0	0	0
76	1.26667	4	0	1	0	0	0	0	0	0	0
77	1.28333	4	0	1	0	0	0	0	0	0	0
78	1.3	4	0	1	0	0	0	0	0	0	0
79	1.31667	4	0	1	0	0	0	0	0	0	0
80	1.33333	4	0	1	1	0	0	0	0	0	0
81	1.35	4	0	1	1	0	0	0	0	0	0
82	1.36667	4	0	1	1	0	0	0	0	0	0
83	1.38333	4	0	1	2	0	0	0	0	0	0
84	1.4	4	0	1	2	0	0	0	0	0	0
85	1.41667	4	0	1	2	0	0	0	0	0	0
86	1.43333	4	0	1	2	0	0	0	0	0	0
87	1.45	4	0	1	2	0	0	0	0	0	0
88	1.46667	4	0	1	2	0	0	0	0	0	0
89	1.48333	4	0	1	2	0	0	0	0	0	0
90	1.5	4	0	1	2	0	0	0	0	0	0
91	1.51667	4	0	2	2	0	0	0	0	0	0
92	1.53333	4	0	2	2	0	0	0	0	0	0
93	1.55	4	0	2	2	0	0	0	0	0	0
94	1.56667	4	0	2	2	0	0	0	0	0	0
95	1.58333	4	0	2	1	0	0	0	0	0	0
96	1.6	4	0	1	1	0	0	0	0	0	0
97	1.61667	4	0	1	1	0	0	0	0	0	0
98	1.63333	4	0	1	2	0	0	0	0	0	0
99	1.65	4	0	1	1	0	0	0	0	0	0
100	1.66667	4	0	1	1	0	0	0	0	0	0
101	1.68333	4	0	1	1	0	0	0	0	0	0
102	1.7	4	0	1	1	0	0	0	0	0	0
103	1.71667	4	0	1	1	0	0	0	0	0	0
104	1.73333	4	0	1	1	0	0	0	0	0	0
105	1.75	4	0	1	1	0	0	0	0	0	0
106	1.76667	4	0	0	1	0	0	0	0	0	0
107	1.78333	4	0	0	1	0	0	0	0	0	0
108	1.8	4	0	0	1	0	0	0	0	0	0
109	1.81667	4	0	0	1	0	0	0	0	0	0
110	1.83333	4	0	0	1	0	0	0	0	0	0
111	1.85	4	0	0	1	0	0	0	0	0	0
112	1.86667	4	0	0	1	0	0	0	0	0	0
113	1.88333	4	0	0	1	0	0	0	0	0	0
114	1.9	4	0	0	1	0	0	0	0	0	0
115	1.91667	4	0	0	1	0	0	0	0	0	0
116	1.93333	4	0	0	1	0	0	0	0	0	0
117	1.95	4	0	0	1	0	0	0	0	0	0
118	1.96667	4	0	0	1	0	0	0	0	0	0
119	1.98333	4	0	1	1	0	0	0	0	0	0
120	2	4	0	1	1	0	0	0	0	0	0
121	2.01667	4	0	1	1	0	0	0	0	0	0
122	2.03333	4	0	1	1	0	0	0	0	0	0
123	2.05	4	0	1	1	0	0	0	0	0	0
124	2.06667	4	0	1	1	0	0	0	0	0	0
125	2.08333	4	0	1	1	0	0	0	0	0	0
126	2.1	4	0	1	1	0	0	0	0	0	0
127	2.11667	4	0	1	1	0	0	0	0	0	0
128	2.13333	4	0	1	1	0	0	0	0	0	0
129	2.15	4	0	1	1	0	0	0	0	0	0
130	2.16667	4	0	1	1	0	0	0	0	0	0
131	2.18333	4	0	1	1	0	0	0	0	0	0
132	2.2	4	0	1	1	0	0	0	0	0	0
133	2.21667	4	0	1	1	0	0	0	0	0	0
134	2.23333	4	0	1	1	0	0	0	0	0	0
135	2.25	4	0	1	1	0	0	0	0	0	0
136	2.26667	4	0	1	1	0	0	0	0	0	0
137	2.28333	4	0	0	1	0	0	0	0	0	0
138	2.3	4	0	0	1	0	0	0	0	0	0
139	2.31667	4	0	0	1	0	0	0	0	0	0
140	2.33333	4	0	0	1	0	0	0	0	0	0
141	2.35	4	0	0	1	0	0	0	0	0	0
142	2.36667	4	0	0	1	0	0	0	0	0	0
143	2.38333	4	0	0	1	0	0	0	0	0	0
144	2.4	4	0	0	1	0	0	0	0	0	0
145	2.41667	4	0	0	1	0	0	0	0	0	0
146	2.43333	4	0	0	1	0	0	0	0	0	0
147	2.45	4	0	0	1	0	0	0	0	0	0
148	2.46667	4	0	0	1	0	0	0	0	0	0
149	2.48333	4	0	0	1	0	0	0	0	0	0
150	2.5	4	0	0	1	0	0	0	0	0	0
151	2.51667	4	0	0	1	0	0	0	0	0	0
152	2.53333	4	0	0	1	0	0	0	0	0	0
153	2.55	4	0	0	1	0	0	0	0	0	0
154	2.56667	4	0	0	1	0	0	0	0	0	0
155	2.58333	4	0	0	1	0	0	0	0	0	0
156	2.6	4	0	0	1	0	0	0	0	0	0
157	2.61667	4	0	0	0	0	0	0	0	0	0
158	2.63333	4	0	0	0	1	0	0	0	0	0
159	2.65	4	0	0	0	1	0	0	0	0	0
160	2.66667	4	0	0	0	1	0	0	0	0	0
161	2.68333	4	0	0	0	0	0	0	0	0	0
162	2.7	4	0	0	0	0	0	0	0	0	0
163	2.71667	4	0	0	0	0	0	0	0	0	0
164	2.73333	4	0	0	0	0	0	0	0	0	0
165	2.75	4	0	0	0	0	0	0	0	0	0
166	2.76667	4	0	0	0	0	0	0	0	0	0
167	2.78333	4	0	0	0	0	0	0	0	0	0
168	2.8	4	0	0	0	0	0	0	0	0	0
169	2.81667	4	0	0	0	0	0	0	0	0	0
170	2.83333	4	0	0	0	0	0	0	0	0	0
171	2.85	4	0	0	0	0	0	0	0	0	0
172	2.86667	4	0	0	0	0	0	0	0	0	0
173	2.88333	4	0	0	0	0	0	0	0	0	0
174	2.9	4	0	0	0	0	0	0	0	0	0
175	2.91667	4	0	0	0	0	0	0	0	0	0
176	2.93333	4	0	0	0	0	0	0	0	0	0
177	2.95	4	0	0	0	0	0	0	0	0	0
178	2.96667	4	0	0	0	0	0	0	0	0	0
179	2.98333	4	0	0	0	0	0	0	0	0	0
180	3	4	0	0	0	0	0	0	0	0	0
181	3.01667	4	0	0	0	0	0	0	0	0	0
182	3.03333	4	0	0	0	0	0	0	0	0	0
183	3.05	4	0	0	0	0	0	0	0	0	0
184	3.06667	4	0	0	0	0	0	0	0	0	0
185	3.08333	4	0	0	0	0	0	0	0	0	0
186	3.1	4	0	0	0	0	0	0	0	0	0
187	3.11667	4	0	0	0	0	0	0	0	0	0
188	3.13333	4	0	0	0	0	0	0	0	0	0
189	3.15	4	0	0	0	0	0	0	0	0	0
190	3.16667	4	0	0	0	0	0	0	0	0	0
191	3.18333	4	0	0	0	0	0	0	0	0	0
192	3.2	4	0	0	0	0	0	0	0	0	0
193	3.21667	4	0	0	0	0	0	0	0	0	0
194	3.23333	4	0	0	0	0	0	0	0	0	0
195	3.25	4	0	0	0	0	0	0	0	0	0
196	3.26667	4	0	0	0	0	0	0	0	0	0
197	3.28333	4	0	0	0	0	0	0	0	0	0
198	3.3	4	0	0	0	0	0	0	0	0	0
199	3.31667	4	0	0	0	0	0	0	0	0	0
200	3.33333	4	0	0	0	0	0	0	0	0	0
201	3.35	4	0	0	0	0	0	0	0	0	0
202	3.36667	4	0	0	0	0	0	0	0	0	0
203	3.38333	4	0	0	0	0	0	0	0	0	0
204	3.4	4	0	0	0	0	0	0	0	0	0
205	3.41667	4	0	0	0	0	0	0	0	0	0
206	3.43333	4	0	0	0	0	0	0	0	0	0
207	3.45	4	0	0	0	0	0	0	0	0	0
208	3.46667	4	0	0	0	0	0	0	0	0	0
209	3.48333	4	0	0	0	0	0	0	0	0	0
210	3.5	4	0	0	0	0	0	0	0	0	0
211	3.51667	4	0	0	0	0	0	0	0	0	0
212	3.53333	4	0	0	0	0	0	0	0	0	0
213	3.55	4	0	0	0	0	0	0	0	0	0
214	3.56667	4	0	0	0	0	0	0	0	0	0
215	3.58333	4	0	0	0	0	0	0	0	0	0
216	3.6	4	0	0	0	0	0	0	0	0	0
217	3.61667	4	0	0	0	0	0	0	0	0	0
218	3.63333	4	0	0	0	0	0	0	0	0	0
219	3.65	4	0	0	0	0	0	0	0	0	0
220	3.66667	4	0	0	0	0	0	0	0	0	0
221	3.68333	4	0	0	0	0	0	0	0	0	0
222	3.7	4	0	0	0	0	0	0	0	0	0
223	3.71667	4	0	0	0	0	0	0	0	0	0
224	3.73333	4	0	0	0	0	0	0	0	0	0
225	3.75	4	0	0	0	0	0	0	0	0	0
226	3.76667	4	0	0	0	0	0	0	0	0	0
227	3.78333	4	0	0	0	0	0	0	0	0	0
228	3.8	4	0	0	0	0	0	0	0	0	0
229	3.81667	4	0	0	0	0	0	0	0	0	0
230	3.83333	4	0	0	0	0	0	0	0	0	0
231	3.85	4	0	0	0	0	0	0	0	0	0
232	3.86667	4	0	0	1	0	0	0	0	0	0
233	3.88333	4	0	0	1	0	0	0	0	0	0
234	3.9	4	0	0	1	0	0	0	0	0	0
235	3.91667	4	0	0	1	0	0	0	0	0	0
236	3.93333	4	0	0	1	0	0	0	0	0	0
237	3.95	4	0	0	1	0	0	0	0	0	0
238	3.96667	4	0	0	1	0	0	0	0	0	0
239	3.98333	4	0	0	1	0	0	0	0	0	0
240	4	4	0	0	0	0	0	0	0	0	0
241	4.01667	4	0	1	0	0	0	0	0	0	0
242	4.03333	4	0	1	0	0	0	0	0	0	0
243	4.05	4	0	1	0	0	0	0	0	0	0
244	4.06667	4	0	1	0	0	0	0	0	0	0
245	4.08333	4	0	1	0	0	0	0	0	0	0
246	4.1	4	0	0	0	0	0	0	0	0	0
247	4.11667	4	0	0	0	0	0	0	0	0	0
248	4.13333	4	0	0	0	0	0	0	0	0	0
249	4.15	4	0	0	0	0	0	0	0	0	0
250	4.16667	4	0	0	0	0	0	0	0	0	0
251	4.18333	4	0	0	0	0	0	0	0	0	0
252	4.2	4	0	0	0	0	0	0	0	0	0
253	4.21667	4	0	0	0	0	0	0	0	0	0
254	4.23333	4	0	0	0	0	0	0	0	0	0
255	4.25	4	0	0	0	0	0	0	0	0	0
256	4.26667	4	0	0	0	0	0	0	0	0	0
257	4.28333	4	0	0	0	0	0	0	0	0	0
258	4.3	4	0	0	0	0	0	0	0	0	0
259	4.31667	4	0	0	0	0	0	0	0	0	0
260	4.33333	4	0	0	0	0	0	0	0	0	0
261	4.35	4	0	0	0	0	0	0	0	0	0
262	4.36667	4	0	0	0	0	0	0	0	0	0
263	4.38333	4	0	1	0	0	0	0	0	0	0
264	4.4	4	0	1	0	0	0	0	0	0	0
265	4.41667	4	0	1	0	0	0	0	0	0	0
266	4.43333	4	0	1	0	0	0	0	0	0	0
267	4.45	4	0	1	0	0	0	0	0	0	0
268	4.46667	4	0	1	0	0	0	0	0	0	0
269	4.48333	4	0	1	0	0	0	0	0	0	0
270	4.5	4	0	1	0	0	0	0	0	0	0
271	4.51667	4	0	1	0	0	0	0	0	0	0
272	4.53333	4	0	1	0	0	0	0	0	0	0
273	4.55	4	0	1	0	0	0	0	0	0	0
274	4.56667	4	0	1	0	0	0	0	0	0	0
275	4.58333	4	0	1	0	0	0	0	0	0	0
276	4.6	4	0	1	0	0	0	0	0	0	0
277	4.61667	4	0	2	0	0	0	0	0	0	0
278	4.63333	4	0	2	0	0	0	0	0	0	0
279	4.65	4	0	2	0	0	0	0	0	0	0
280	4.66667	4	0	1	0	0	0	0	0	0	0
281	4.68333	4	0	1	0	0	0	0	0	0	0
282	4.7	4	0	1	0	0	0	0	0	0	0
283	4.71667	4	0	1	0	0	0	0	0	0	0
284	4.73333	4	0	2	0	0	0	0	0	0	0
285	4.75	4	0	2	0	0	0	0	0	0	0
286	4.76667	4	0	2	0	0	0	0	0	0	0
287	4.78333	4	0	1	0	0	0	0	0	0	0
288	4.8	4	0	1	0	0	0	0	0	0	0
289	4.81667	4	0	1	0	0	0	0	0	0	0
290	4.83333	4	0	1	0	0	0	0	0	0	0
291	4.85	4	0	1	0	0	0	0	0	0	0
292	4.86667	4	0	1	0	0	0	0	0	0	0
293	4.88333	4	0	0	0	0	0	0	0	0	0
294	4.9	4	0	0	0	0	0	0	0	0	0
295	4.91667	4	0	0	0	0	0	0	0	0	0
296	4.93333	4	0	0	0	0	0	0	0	0	0
297	4.95	4	0	0	0	0	0	0	0	0	0
298	4.96667	4	0	0	0	0	0	0	0	0	0
299	4.98333	4	0	0	0	0	0	0	0	0	0
300	5	4	0	0	0	0	0	0	0	0	0
301	5.01667	4	0	0	0	0	0	0	0	0	0
302	5.03333	4	0	0	0	0	0	0	0	0	0
303	5.05	4	0	0	0	0	0	0	0	0	0
304	5.06667	4	0	0	0	0	0	0	0	0	0
305	5.08333	4	0	0	0	0	0	0	0	0	0
306	5.1	4	0	0	0	0	0	0	0	0	0
307	5.11667	4	0	0	0	0	0	0	0	0	0
308	5.13333	4	0	0	0	0	0	0	0	0	0
309	5.15	4	0	0	0	0	0	0	0	0	0
310	5.16667	4	0	0	0	0	0	0	0	0	0
311	5.18333	4	0	0	0	0	0	0	0	0	0
312	5.2	4	0	0	0	0	0	0	0	0	0
313	5.21667	4	0	0	0	0	0	0	0	0	0
314	5.23333	4	0	0	0	0	0	0	0	0	0
315	5.25	4	0	0	0	0	0	0	0	0	0
316	5.26667	4	0	0	0	0	0	0	0	0	0
317	5.28333	4	0	0	0	0	0	0	0	0	0
318	5.3	4	0	0	0	0	0	0	0	0	0
319	5.31667	4	0	0	0	0	0	0	0	0	0
320	5.33333	4	0	0	0	0	0	0	0	0	0
321	5.35	4	0	0	0	0	0	0	0	0	0
322	5.36667	4	0	0	0	0	0	0	0	0	0
323	5.38333	4	0	0	0	0	0	0	0	0	0
324	5.4	4	0	0	0	0	0	0	0	0	0
325	5.41667	4	0	0	0	0	0	0	0	0	0
326	5.43333	4	0	0	0	0	0	0	0	0	0
327	5.45	4	0	0	0	0	0	0	0	0	0
328	5.46667	4	0	0	0	0	0	0	0	0	0
329	5.48333	4	0	0	0	0	0	0	0	0	0
330	5.5	4	0	0	0	0	0	0	0	0	0
331	5.51667	4	0	0	0	0	0	0	0	0	0
332	5.53333	4	0	0	0	0	0	0	0	0	0
333	5.55	4	0	0	0	0	0	0	0	0	0
334	5.56667	4	0	0	0	0	0	0	0	0	0
335	5.58333	4	0	0	0	0	0	0	0	0	0
336	5.6	4	0	0	0	0	0	0	0	0	0
337	5.61667	4	0	0	0	0	0	0	0	0	0
338	5.63333	4	0	0	0	0	0	0	0	0	0
339	5.65	4	0	0	0	0	0	0	0	0	0
340	5.66667	4	0	0	0	0	0	0	0	0	0
341	5.68333	4	0	0	0	0	0	0	0	0	0
342	5.7	4	0	0	0	0	0	0	0	0	0
343	5.71667	4	0	0	0	0	0	0	0	0	0
344	5.73333	4	0	0	0	0	0	0	0	0	0
345	5.75	4	0	0	0	0	0	0	0	0	0
346	5.76667	4	0	0	0	0	0	0	0	0	0
347	5.78333	4	0	0	0	0	0	0	0	0	0
348	5.8	4	0	0	0	0	0	0	0	0	0
349	5.81667	4	0	0	0	0	0	0	0	0	0
350	5.83333	4	0	0	0	0	0	0	0	0	0
351	5.85	4	0	0	0	0	0	0	0	0	0
352	5.86667	4	0	0	0	0	0	0	0	0	0
353	5.88333	4	0	0	0	0	0	0	0	0	0
354	5.9	4	0	0	0	0	0	0	0	0	0
355	5.91667	4	0	0	0	0	0	0	0	0	0
356	5.93333	4	0	0	0	0	0	0	0	0	0
357	5.95	4	0	0	0	0	0	0	0	0	0
358	5.96667	4	0	0	0	0	0	0	0	0	0
359	5.98333	4	0	0	0	0	0	0	0	0	0
360	6	4	0	0	0	0	0	0	0	0	0
361	6.01667	4	0	0	0	0	0	0	0	0	0
362	6.03333	4	0	0	0	0	0	0	0	0	0
363	6.05	4	0	0	0	0	0	0	0	0	0
364	6.06667	4	0	0	0	0	0	0	0	0	0
365	6.08333	4	0	0	0	0	0	0	0	0	0
366	6.1	4	0	0	0	0	0	0	0	0	0
367	6.11667	4	0	0	0	0	0	0	0	0	0
368	6.13333	4	0	0	0	0	0	0	0	0	0
369	6.15	4	0	0	0	0	0	0	0	0	0
370	6.16667	4	0	0	0	0	0	0	0	0	0
371	6.18333	4	0	0	0	0	0	0	0	0	0
372	6.2	4	0	0	0	0	0	0	0	0	0
373	6.21667	4	0	0	0	0	0	0	0	0	0
374	6.23333	4	0	0	0	0	0	0	0	0	0
375	6.25	4	0	0	0	0	0	0	0	0	0
376	6.26667	4	0	0	0	0	0	0	0	0	0
377	6.28333	4	0	0	0	0	0	0	0	0	0
378	6.3	4	0	0	0	0	0	0	0	0	0
379	6.31667	4	0	0	0	0	0	0	0	0	0
380	6.33333	4	0	0	0	0	0	0	0	0	0
381	6.35	4	0	0	0	0	0	0	0	0	0
382	6.36667	4	0	0	0	0	0	0	0	0	0
383	6.38333	4	0	0	0	0	0	0	0	0	0
384	6.4	4	0	0	0	0	0	0	0	0	0
385	6.41667	4	0	0	0	0	0	0	0	0	0
386	6.43333	4	0	0	0	0	0	0	0	0	0
387	6.45	4	0	0	0	0	0	0	0	0	0
388	6.46667	4	0	0	1	0	0	0	0	0	0
389	6.48333	4	0	0	1	0	0	0	0	0	0
390	6.5	4	0	0	1	0	0	0	0	0	0
391	6.51667	4	0	0	1	0	0	0	0	0	0
392	6.53333	4	0	0	1	0	0	0	0	0	0
393	6.55	4	0	0	1	0	0	0	0	0	0
394	6.56667	4	0	0	1	0	0	0	0	0	0
395	6.58333	4	0	0	1	0	0	0	0	0	0
396	6.6	4	0	0	1	0	0	0	0	0	0
397	6.61667	4	0	0	1	0	0	0	0	0	0
398	6.63333	4	0	0	1	0	0	0	0	0	0
399	6.65	4	0	0	1	0	0	0	0	0	0
400	6.66667	4	0	0	1	0	0	0	0	0	0
401	6.68333	4	0	0	1	0	0	0	0	0	0
402	6.7	4	0	0	1	0	0	0	0	0	0
403	6.71667	4	0	0	1	0	0	0	0	0	0
404	6.73333	4	0	0	1	0	0	0	0	0	0
405	6.75	4	0	0	1	0	0	0	0	0	0
406	6.76667	4	0	0	1	0	0	0	0	0	0
407	6.78333	4	0	0	1	0	1	0	0	0	0
408	6.8	4	0	0	1	0	1	0	0	0	0
409	6.81667	4	0	0	1	0	1	0	0	0	0
410	6.83333	4	0	0	1	0	1	0	0	0	0
411	6.85	4	0	0	1	0	1	0	0	0	0
412	6.86667	4	0	0	1	0	0	0	0	0	0
413	6.88333	4	0	0	1	0	0	0	0	0	0
414	6.9	4	0	0	1	0	0	0	0	0	0
415	6.91667	4	0	0	1	0	0	0	0	0	0
416	6.93333	4	0	0	1	0	0	0	0	0	0
417	6.95	4	0	0	1	0	0	0	0	0	0
418	6.96667	4	0	0	1	0	0	0	0	0	0
419	6.98333	4	0	0	1	0	0	0	0	0	0
420	7	4	0	0	1	0	0	0	0	0	0
421	7.01667	4	0	0	1	0	0	0	0	0	0
422	7.03333	4	0	0	1	0	0	0	0	0	0
423	7.05	4	0	0	1	0	0	0	0	0	0
424	7.06667	4	0	0	1	0	0	0	0	0	0
425	7.08333	4	0	1	1	0	0	0	0	0	0
426	7.1	4	0	1	1	0	0	0	0	0	0
427	7.11667	4	0	1	1	0	0	0	0	0	0
428	7.13333	4	0	1	1	0	0	0	0	0	0
429	7.15	4	0	1	1	0	0	0	0	0	0
430	7.16667	4	0	1	1	0	0	0	0	0	0
431	7.18333	4	0	1	1	0	0	0	0	0	0
432	7.2	4	0	1	1	0	0	0	0	0	0
433	7.21667	4	0	1	1	0	0	0	0	0	0
434	7.23333	4	0	1	1	0	0	0	0	0	0
435	7.25	4	0	1	1	0	0	0	0	0	0
436	7.26667	4	0	1	1	0	0	0	0	0	0
437	7.28333	4	0	1	1	0	0	0	0	0	0
438	7.3	4	0	0	1	0	0	0	0	0	0
439	7.31667	4	0	0	1	0	0	0	0	0	0
440	7.33333	4	0	0	1	0	0	1	0	0	0
441	7.35	4	0	0	1	0	0	1	0	0	0
442	7.36667	4	0	0	1	0	0	1	0	0	0
443	7.38333	4	0	0	1	0	0	1	0	0	0
444	7.4	4	0	0	1	0	0	1	0	0	0
445	7.41667	4	0	0	1	0	0	1	0	0	0
446	7.43333	4	0	0	1	0	0	1	0	0	0
447	7.45	4	0	0	1	0	0	1	0	0	0
448	7.46667	4	0	0	1	0	0	1	0	0	0
449	7.48333	4	0	0	1	0	0	1	0	0	0
450	7.5	4	0	0	1	0	0	1	0	0	0
451	7.51667	4	0	1	1	0	0	1	0	0	0
452	7.53333	4	0	1	1	0	0	1	0	0	0
453	7.55	4	0	1	1	0	0	1	0	0	0
454	7.56667	4	0	1	1	0	0	1	0	0	0
455	7.58333	4	0	1	1	0	0	1	0	0	0
456	7.6	4	0	1	1	0	0	1	0	0	0
457	7.61667	4	0	2	1	0	0	1	0	0	0
458	7.63333	4	0	2	1	0	0	1	0	0	0
459	7.65	4	0	2	1	0	0	1	0	0	0
460	7.66667	4	0	2	1	0	0	1	0	0	0
461	7.68333	4	0	2	1	0	0	1	0	0	0
462	7.7	4	0	2	1	0	0	1	0	0	0
463	7.71667	4	0	2	1	0	0	1	0	0	0
464	7.73333	4	0	2	1	0	0	1	0	0	0
465	7.75	4	0	2	1	0	0	1	0	0	0
466	7.76667	4	0	2	1	0	0	1	0	0	0
467	7.78333	4	0	2	1	0	0	1	0	0	0
468	7.8	4	0	2	1	0	0	1	0	0	0
469	7.81667	4	0	2	1	0	0	1	0	0	0
470	7.83333	4	0	2	1	0	0	1	0	0	0
471	7.85	4	0	2	1	0	0	1	0	0	0
472	7.86667	4	0	2	0	0	0	1	0	0	0
473	7.88333	4	0	2	0	0	0	1	0	0	0
474	7.9	4	0	1	0	0	0	1	0	0	0
475	7.91667	4	0	1	0	0	0	1	0	0	0
476	7.93333	4	0	1	0	0	0	1	0	0	0
477	7.95	4	0	1	0	0	0	1	0	0	0
478	7.96667	4	0	1	0	0	0	1	0	0	0
479	7.98333	4	0	1	0	0	0	1	0	0	0
480	8	4	0	1	0	0	0	1	0	0	0
481	8.01667	4	0	1	0	0	0	1	0	0	0
482	8.03333	4	0	1	0	0	0	1	0	0	0
483	8.05	4	0	1	0	0	0	1	0	0	0
484	8.06667	4	0	1	0	0	0	1	0	0	0
485	8.08333	4	0	1	0	0	0	1	0	0	0
486	8.1	4	0	1	0	0	0	1	0	0	0
487	8.11667	4	0	0	0	0	0	1	0	0	0
488	8.13333	4	0	0	0	0	0	1	0	0	0
489	8.15	4	0	0	0	0	0	1	0	0	0
490	8.16667	4	0	0	0	0	0	1	0	0	0
491	8.18333	4	0	0	0	0	0	1	0	0	0
492	8.2	4	0	0	0	0	0	1	0	0	0
493	8.21667	4	0	0	0	0	0	1	0	0	0
494	8.23333	4	0	0	0	0	0	1	0	0	0
495	8.25	4	0	0	0	0	0	0	0	0	0
496	8.26667	4	0	0	0	0	0	0	0	0	0
497	8.28333	4	0	0	0	0	0	0	0	0	0
498	8.3	4	0	0	0	0	0	0	0	0	0
499	8.31667	4	0	2	0	0	0	0	0	0	0
500	8.33333	4	0	2	0	0	0	0	0	0	0
501	8.35	4	0	2	0	0	0	0	0	0	0
502	8.36667	4	0	2	0	0	0	0	0	0	0
503	8.38333	4	0	2	0	0	0	0	0	0	0
504	8.4	4	0	2	0	0	0	0	0	0	0
505	8.41667	4	0	0	0	0	0	0	0	0	0
506	8.43333	4	0	0	0	0	0	0	0	0	0
507	8.45	4	0	0	0	0	0	0	0	0	0
508	8.46667	4	0	0	0	0	0	0	0	0	0
509	8.48333	4	0	0	0	0	0	0	0	0	0
510	8.5	4	0	0	0	0	0	0	0	0	0
511	8.51667	4	0	0	0	0	0	0	0	0	0
512	8.53333	4	0	0	0	0	0	0	0	0	0
513	8.55	4	0	0	0	0	0	0	0	0	0
514	8.56667	4	0	0	0	0	0	0	0	0	0
515	8.58333	4	0	0	0	0	0	2	0	0	0
516	8.6	4	0	0	0	0	0	2	0	0	0
517	8.61667	4	0	0	0	0	0	2	0	0	0
518	8.63333	4	0	1	1	0	0	2	0	0	0
519	8.65	4	0	1	1	0	0	2	0	0	0
520	8.66667	4	0	1	1	0	0	2	0	0	0
521	8.68333	4	0	1	1	0	0	2	0	0	0
522	8.7	4	0	0	1	0	0	2	0	0	0
523	8.71667	4	0	0	1	0	0	2	0	0	0
524	8.73333	4	0	0	1	0	0	2	0	0	0
525	8.75	4	0	0	1	0	0	2	0	0	0
526	8.76667	4	0	0	1	0	0	2	0	0	0
527	8.78333	4	0	0	1	0	0	2	0	0	0
528	8.8	4	0	0	1	0	0	2	0	0	0
529	8.81667	4	0	0	1	0	0	2	0	0	0
530	8.83333	4	0	0	1	0	0	2	0	0	0
531	8.85	4	0	0	1	0	0	2	0	0	0
532	8.86667	4	0	0	1	0	0	2	0	0	0
533	8.88333	4	0	0	1	0	0	5	0	0	0
534	8.9	4	0	0	1	0	0	5	0	0	0
535	8.91667	4	0	0	1	0	0	5	0	0	0
536	8.93333	4	0	0	1	0	0	3	0	0	0
537	8.95	4	0	0	1	0	0	3	0	0	0
538	8.96667	4	0	0	1	0	0	3	0	0	0
539	8.98333	4	0	0	1	0	0	3	0	0	0
540	9	4	0	0	1	0	0	3	0	0	0
541	9.01667	4	0	0	1	0	0	3	0	0	0
542	9.03333	4	0	0	1	0	0	3	0	0	0
543	9.05	4	0	0	1	0	0	3	0	0	0
544	9.06667	4	0	0	1	0	0	3	0	0	0
545	9.08333	4	0	0	1	0	0	3	0	0	0
546	9.1	4	0	0	1	0	0	3	0	0	0
547	9.11667	4	0	0	1	0	0	3	0	0	0
548	9.13333	4	0	0	1	0	0	3	0	0	0
549	9.15	4	0	0	1	0	0	3	0	0	0
550	9.16667	4	0	0	1	0	0	3	0	0	0
551	9.18333	4	0	0	1	0	0	3	0	0	0
552	9.2	4	0	0	1	0	0	3	0	0	0
553	9.21667	4	0	0	1	0	0	5	0	0	0
554	9.23333	4	0	0	1	0	0	2	0	0	0
555	9.25	4	0	0	1	0	0	2	0	0	0
556	9.26667	4	0	0	1	0	0	2	0	0	0
557	9.28333	4	0	0	1	0	0	2	0	0	0
558	9.3	4	0	0	1	0	0	2	0	0	0
559	9.31667	4	0	0	1	0	0	2	0	0	0
560	9.33333	4	0	0	1	0	0	2	0	0	0
561	9.35	4	0	0	1	0	0	2	0	0	0
562	9.36667	4	0	0	1	0	0	2	0	0	0
563	9.38333	4	0	0	1	0	0	2	0	0	0
564	9.4	4	0	0	1	0	0	2	0	0	0
565	9.41667	4	0	1	1	0	0	2	0	0	0
566	9.43333	4	0	1	1	0	0	2	0	0	0
567	9.45	4	0	1	1	0	0	2	0	0	0
568	9.46667	4	0	1	1	0	0	2	0	0	0
569	9.48333	4	0	1	1	0	0	2	0	0	0
570	9.5	4	0	1	1	0	0	2	0	0	0
571	9.51667	4	0	1	1	0	0	4	0	0	0
572	9.53333	4	0	1	1	0	0	4	0	0	0
573	9.55	4	0	1	1	0	0	4	0	0	0
574	9.56667	4	0	1	1	0	0	2	0	0	0
575	9.58333	4	0	1	1	0	0	2	0	0	0
576	9.6	4	0	1	1	0	0	2	0	0	0
577	9.61667	4	0	1	1	0	0	2	0	0	0
578	9.63333	4	0	1	1	0	0	2	0	0	0
579	9.65	4	0	1	1	0	0	2	0	0	0
580	9.66667	4	0	1	1	0	0	2	0	0	0
581	9.68333	4	0	1	1	0	0	2	0	0	0
582	9.7	4	0	1	1	0	0	2	0	0	0
583	9.71667	4	0	1	1	0	0	2	0	0	0
584	9.73333	4	0	1	1	0	0	2	0	0	0
585	9.75	4	0	1	1	0	0	2	0	0	0
586	9.76667	4	0	0	1	0	0	2	0	0	0
587	9.78333	4	0	0	1	0	0	2	0	0	0
588	9.8	4	0	0	1	0	0	2	0	0	0
589	9.81667	4	0	0	1	0	0	2	0	0	0
590	9.83333	4	0	0	1	0	0	2	0	0	0
591	9.85	4	0	0	1	0	0	2	0	0	0
592	9.86667	4	0	0	1	0	0	0	0	0	0
593	9.88333	4	0	0	1	0	0	0	0	0	0
594	9.9	4	0	0	1	0	0	0	0	0	0
595	9.91667	4	0	0	1	0	0	0	0	0	0
596	9.93333	4	0	0	1	0	0	1	0	0	0
597	9.95	4	0	0	1	0	0	1	0	0	0
598	9.96667	4	0	0	1	0	0	1	0	0	0
599	9.98333	4	0	0	1	0	0	1	0	0	0
600	10	4	0	0	1	0	0	1	0	0	0
601	10.0167	4	0	0	1	0	0	1	0	0	0
602	10.0333	4	0	1	1	0	0	1	0	0	0
603	10.05	4	0	1	1	0	0	1	0	0	0
604	10.0667	4	0	1	1	0	0	1	0	0	0
605	10.0833	4	0	1	1	0	0	1	0	0	0
606	10.1	4	0	0	1	0	0	1	0	0	0
607	10.1167	4	0	0	1	0	0	1	0	0	0
608	10.1333	4	0	0	1	0	0	1	0	0	0
609	10.15	4	0	0	1	0	0	1	0	0	0
610	10.1667	4	0	0	1	0	0	1	0	0	0
611	10.1833	4	0	0	1	0	0	1	0	0	0
612	10.2	4	0	0	1	0	0	1	0	0	0
613	10.2167	4	0	0	1	0	0	1	0	0	0
614	10.2333	4	0	0	1	0	0	1	0	0	0
615	10.25	4	0	0	1	0	0	1	0	0	0
616	10.2667	4	0	0	1	0	0	1	0	0	0
617	10.2833	4	0	0	1	0	0	0	0	0	0
618	10.3	4	0	0	1	0	0	0	0	0	0
619	10.3167	4	0	0	1	0	0	0	0	0	0
620	10.3333	4	0	0	1	0	0	0	0	0	0
621	10.35	4	0	0	1	0	0	0	0	0	0
622	10.3667	4	0	0	1	0	0	0	0	0	0
623	10.3833	4	0	0	1	0	0	0	0	0	0
624	10.4	4	0	0	1	0	0	0	0	0	0
625	10.4167	4	0	0	1	0	0	0	0	0	0
626	10.4333	4	0	0	1	0	0	0	0	0	0
627	10.45	4	0	0	1	0	0	0	0	0	0
628	10.4667	4	0	0	1	0	0	0	0	0	0
629	10.4833	4	0	0	1	0	0	0	0	0	0
630	10.5	4	0	0	1	0	0	0	0	0	0
631	10.5167	4	0	0	1	0	0	0	0	0	0
632	10.5333	4	0	0	1	0	0	0	0	0	0
633	10.55	4	0	0	1	0	0	0	0	0	0
634	10.5667	4	0	0	1	0	0	0	0	0	0
635	10.5833	4	0	0	1	0	0	0	0	0	0
636	10.6	4	0	0	1	0	0	0	0	0	0
637	10.6167	4	0	0	1	0	0	0	0	0	0
638	10.6333	4	0	0	1	0	0	0	0	0	0
639	10.65	4	0	0	1	0	0	0	0	0	0
640	10.6667	4	0	0	1	0	0	0	0	0	0
641	10.6833	4	0	0	1	0	0	0	0	0	0
642	10.7	4	0	0	1	0	0	0	0	0	0
643	10.7167	4	0	0	1	0	0	0	0	0	0
644	10.7333	4	0	0	1	0	0	0	0	0	0
645	10.75	4	0	0	1	0	0	0	0	0	0
646	10.7667	4	0	0	1	0	0	0	0	0	0
647	10.7833	4	0	0	1	0	0	0	0	0	0
648	10.8	4	0	0	1	0	0	0	0	0	0
649	10.8167	4	0	0	1	0	0	0	0	0	0
650	10.8333	4	0	0	1	0	0	0	0	0	0
651	10.85	4	0	0	1	0	0	0	0	0	0
652	10.8667	4	0	0	1	0	0	0	0	0	0
653	10.8833	4	0	1	1	0	0	0	0	0	0
654	10.9	4	0	1	1	0	0	0	0	0	0
655	10.9167	4	0	1	1	0	0	0	0	0	0
656	10.9333	4	0	1	1	0	0	0	0	0	0
657	10.95	4	0	1	1	0	0	0	0	0	0
658	10.9667	4	0	1	1	0	0	0	0	0	0
659	10.9833	4	0	1	1	0	0	0	0	0	0
660	11	4	0	1	1	0	0	0	0	0	0
661	11.0167	4	0	1	1	0	0	0	0	0	0
662	11.0333	4	0	1	1	0	0	0	0	0	0
663	11.05	4	0	1	1	0	0	0	0	0	0
664	11.0667	4	0	1	1	0	0	0	0	0	0
665	11.0833	4	0	1	1	0	0	0	0	0	0
666	11.1	4	0	1	1	0	0	0	0	0	0
667	11.1167	4	0	1	1	0	0	0	0	0	0
668	11.1333	4	0	1	1	0	0	0	0	0	0
669	11.15	4	0	1	1	0	0	0	0	0	0
670	11.1667	4	0	1	1	0	0	0	0	0	0
671	11.1833	4	0	1	1	0	0	0	0	0	0
672	11.2	4	0	1	1	0	0	0	0	0	0
673	11.2167	4	0	1	1	0	0	0	0	0	0
674	11.2333	4	0	1	1	0	0	0	0	0	0
675	11.25	4	0	1	1	0	0	0	0	0	0
676	11.2667	4	0	1	1	0	0	0	0	0	0
677	11.2833	4	0	1	1	0	0	0	0	0	0
678	11.3	4	0	1	1	0	0	0	0	0	0
679	11.3167	4	0	1	1	0	0	0	0	0	0
680	11.3333	4	0	1	2	0	0	0	0	0	0
681	11.35	4	0	1	1	0	0	0	0	0	0
682	11.3667	4	0	1	1	0	0	0	0	0	0
683	11.3833	4	0	1	1	0	0	0	0	0	0
684	11.4	4	0	0	1	0	0	0	0	0	0
685	11.4167	4	0	0	1	0	0	0	0	0	0
686	11.4333	4	0	1	1	0	0	0	0	0	0
687	11.45	4	0	1	1	0	0	0	0	0	0
688	11.4667	4	0	1	1	0	0	0	0	0	0
689	11.4833	4	0	1	1	0	0	0	0	0	0
690	11.5	4	0	0	1	0	0	0	0	0	0
691	11.5167	4	0	0	1	0	0	0	0	0	0
692	11.5333	4	0	1	3	0	0	0	0	0	0
693	11.55	4	0	1	3	0	0	0	0	0	0
694	11.5667	4	0	1	3	0	0	0	0	0	0
695	11.5833	4	0	1	3	0	0	0	0	0	0
696	11.6	4	0	1	3	0	0	0	0	0	0
697	11.6167	4	0	1	3	0	0	0	0	0	0
698	11.6333	4	0	1	2	0	0	0	0	0	0
699	11.65	4	0	1	2	0	0	0	0	0	0
700	11.6667	4	0	1	2	0	0	0	0	0	0
701	11.6833	4	0	1	2	0	0	0	0	0	0
702	11.7	4	0	1	2	0	0	0	0	0	0
703	11.7167	4	0	1	2	0	0	0	0	0	0
704	11.7333	4	0	1	1	0	0	0	0	0	0
705	11.75	4	0	1	1	0	0	0	0	0	0
706	11.7667	4	0	1	1	0	0	0	0	0	0
707	11.7833	4	0	1	1	0	0	0	0	0	0
708	11.8	4	0	1	1	0	0	0	0	0	0
709	11.8167	4	0	1	1	0	0	0	0	0	0
710	11.8333	4	0	2	2	0	0	0	0	0	0
711	11.85	4	0	2	2	0	0	0	0	0	0
712	11.8667	4	0	2	2	0	0	0	0	0	0
713	11.8833	4	0	2	2	0	0	0	0	0	0
714	11.9	4	0	2	2	0	0	0	0	0	0
715	11.9167	4	0	1	2	0	0	0	0	0	0
716	11.9333	4	0	1	2	0	0	0	0	0	0
717	11.95	4	0	0	2	0	0	0	0	0	0
718	11.9667	4	0	0	2	0	0	0	0	0	0
719	11.9833	4	0	0	2	0	0	0	0	0	0
720	12	4	0	0	1	0	0	0	0	0	0
721	12.0167	5	0	0	1	0	0	0	0	0	0
722	12.0333	5	0	0	1	0	0	0	0	0	0
723	12.05	5	0	0	1	0	0	0	0	0	0
724	12.0667	5	0	0	1	0	0	0	0	0	0
725	12.0833	5	0	1	1	0	0	0	0	0	0
726	12.1	5	0	1	1	0	0	0	0	0	0
727	12.1167	5	0	1	1	0	0	0	0	0	0
728	12.1333	5	0	1	1	0	0	0	0	0	0
729	12.15	5	0	1	1	0	0	0	0	0	0
730	12.1667	5	0	1	1	0	0	0	0	0	0
731	12.1833	5	0	1	1	0	0	0	0	0	0
732	12.2	5	0	1	1	0	0	0	0	0	0
733	12.2167	5	0	1	1	0	0	0	0	0	0
734	12.2333	5	0	1	1	0	0	0	0	0	0
735	12.25	5	0	1	1	0	0	0	0	0	0
736	12.2667	5	0	1	1	0	0	0	0	0	0
737	12.2833	5	0	1	1	0	0	0	0	0	0
738	12.3	5	0	1	1	0	0	0	0	0	0
739	12.3167	5	0	1	1	0	0	0	0	0	0
740	12.3333	5	0	1	1	0	0	0	0	0	0
741	12.35	5	0	1	1	0	0	0	0	0	0
742	12.3667	5	0	1	1	0	0	0	0	0	0
743	12.3833	5	0	1	1	0	0	0	0	0	0
744	12.4	5	0	1	1	0	0	0	0	0	0
745	12.4167	5	0	1	1	0	0	0	0	0	0
746	12.4333	5	0	1	2	0	0	0	0	0	0
747	12.45	5	0	1	2	0	0	0	0	0	0
748	12.4667	5	0	1	2	0	0	0	0	0	0
749	12.4833	5	0	1	2	0	0	0	0	0	0
750	12.5	5	0	1	2	0	0	0	0	0	0
751	12.5167	5	0	1	2	0	0	0	0	0	0
752	12.5333	5	0	1	3	0	0	0	0	0	0
753	12.55	5	0	1	3	0	0	0	0	0	0
754	12.5667	5	0	1	3	0	0	0	0	0	0
755	12.5833	5	0	1	3	0	0	0	0	0	0
756	12.6	5	0	1	3	0	0	0	0	0	0
757	12.6167	5	0	1	3	0	0	0	0	0	0
758	12.6333	5	0	1	3	0	0	0	0	0	0
759	12.65	5	0	1	3	0	0	0	0	0	0
760	12.6667	5	0	1	3	0	0	0	0	0	0
761	12.6833	5	0	1	3	0	0	0	0	0	0
762	12.7	5	0	1	3	0	0	0	0	0	0
763	12.7167	5	0	1	3	0	0	0	0	0	0
764	12.7333	5	0	1	3	0	0	0	0	0	0
765	12.75	5	0	1	3	0	0	0	0	0	0
766	12.7667	5	0	0	3	0	0	0	0	0	0
767	12.7833	5	0	0	3	0	0	0	0	1	0
768	12.8	5	0	0	3	0	0	0	0	1	0
769	12.8167	5	0	0	3	0	0	0	0	1	0
770	12.8333	5	0	0	3	0	0	0	0	1	0
771	12.85	5	0	0	3	0	0	0	0	0	0
772	12.8667	5	0	0	3	0	0	0	0	0	0
773	12.8833	5	0	0	3	0	0	0	0	0	0
774	12.9	5	0	0	3	0	0	0	0	0	0
775	12.9167	5	0	0	3	0	0	0	0	0	0
776	12.9333	5	0	0	3	0	0	0	0	0	0
777	12.95	5	0	0	3	0	0	0	0	0	0
778	12.9667	5	0	0	3	0	0	0	0	0	0
779	12.9833	5	0	0	3	0	0	0	0	0	0
780	13	5	0	0	3	0	0	0	0	0	0
781	13.0167	5	0	0	3	0	0	0	0	0	0
782	13.0333	5	0	0	3	0	0	0	0	0	0
783	13.05	5	0	0	2	0	0	0	0	0	0
784	13.0667	5	0	0	2	0	0	0	0	0	0
785	13.0833	5	0	0	2	0	0	0	0	0	0
786	13.1	5	0	0	2	0	0	0	0	0	0
787	13.1167	5	0	0	2	1	0	0	0	0	0
788	13.1333	5	0	2	2	1	0	0	0	0	0
789	13.15	5	0	2	2	1	0	0	0	0	0
790	13.1667	5	0	2	2	1	0	0	0	0	0
791	13.1833	5	0	2	2	0	0	0	0	0	0
792	13.2	5	0	2	2	0	0	0	0	0	0
793	13.2167	5	0	2	2	0	0	0	0	0	0
794	13.2333	5	0	2	2	0	0	0	0	0	0
795	13.25	5	0	2	2	0	0	0	0	0	0
796	13.2667	5	0	2	2	0	0	0	0	0	0
797	13.2833	5	0	0	2	0	0	0	0	0	0
798	13.3	5	0	0	2	0	0	0	0	0	0
799	13.3167	5	0	0	2	0	0	0	0	0	0
800	13.3333	5	0	0	2	0	0	0	0	0	0
801	13.35	5	0	0	2	0	0	0	0	0	0
802	13.3667	5	0	1	2	0	0	0	0	0	0
803	13.3833	5	0	1	2	0	0	0	0	0	0
804	13.4	5	0	1	1	0	0	0	0	0	0
805	13.4167	5	0	0	1	0	0	0	0	0	0
806	13.4333	5	0	0	1	0	0	0	0	0	0
807	13.45	5	0	0	1	0	0	0	0	0	0
808	13.4667	5	0	0	1	0	0	0	0	0	0
809	13.4833	5	0	0	1	0	0	0	0	0	0
810	13.5	5	0	0	1	0	0	0	0	0	0
811	13.5167	5	0	0	1	0	0	0	0	0	0
812	13.5333	5	0	0	1	0	0	0	0	0	0
813	13.55	5	0	0	1	0	0	0	0	0	0
814	13.5667	5	0	0	1	0	0	0	0	0	0
815	13.5833	5	0	0	1	0	0	0	0	0	0
816	13.6	5	0	0	1	0	0	0	0	0	0
817	13.6167	5	0	0	1	0	0	0	0	0	0
818	13.6333	5	0	0	1	0	0	0	0	0	0
819	13.65	5	0	0	1	0	0	0	0	0	0
820	13.6667	5	0	0	1	0	0	0	0	0	0
821	13.6833	5	0	0	1	0	0	0	0	0	0
822	13.7	5	0	0	1	0	0	0	0	0	0
823	13.7167	5	0	0	1	0	0	0	0	0	0
824	13.7333	5	0	0	1	0	0	0	0	0	0
825	13.75	5	0	0	1	0	0	0	0	0	0
826	13.7667	5	0	0	1	0	0	0	0	0	0
827	13.7833	5	0	1	1	0	0	0	0	0	0
828	13.8	5	0	1	1	0	0	0	0	0	0
829	13.8167	5	0	0	1	0	0	0	0	0	0
830	13.8333	5	0	0	1	0	0	0	0	0	0
831	13.85	5	0	0	1	0	0	0	0	0	0
832	13.8667	5	0	0	1	0	0	0	0	0	0
833	13.8833	5	0	0	1	0	0	0	0	0	0
834	13.9	5	0	0	1	0	0	0	0	0	0
835	13.9167	5	0	0	1	0	0	0	0	0	0
836	13.9333	5	0	0	1	0	0	0	0	0	0
837	13.95	5	0	0	1	0	0	0	0	0	0
838	13.9667	5	0	0	1	0	0	0	0	0	0
839	13.9833	5	0	0	1	0	0	0	0	0	0
840	14	5	0	0	1	0	0	0	0	0	0
841	14.0167	5	0	0	1	0	0	0	0	0	0
842	14.0333	5	0	0	1	0	0	0	0	0	0
843	14.05	5	0	0	1	0	0	0	0	0	0
844	14.0667	5	0	0	1	0	0	0	0	0	0
845	14.0833	5	0	0	1	0	0	0	0	0	0
846	14.1	5	0	0	1	0	0	0	0	0	0
847	14.1167	5	0	0	1	0	0	0	0	0	0
848	14.1333	5	0	0	1	0	0	0	0	0	0
849	14.15	5	0	0	1	0	0	0	0	0	0
850	14.1667	5	0	0	1	0	0	0	0	0	0
851	14.1833	5	0	0	1	0	0	0	0	0	0
852	14.2	5	0	0	1	0	0	0	0	0	0
853	14.2167	5	0	0	1	0	0	0	0	0	0
854	14.2333	5	0	0	1	0	0	0	0	0	0
855	14.25	5	0	0	1	0	0	0	0	0	0
856	14.2667	5	0	0	1	0	0	0	0	0	0
857	14.2833	5	0	0	1	0	0	0	0	0	0
858	14.3	5	0	0	1	0	0	0	0	0	0
859	14.3167	5	0	0	2	0	0	0	0	0	0
860	14.3333	5	0	1	2	0	0	0	0	0	0
861	14.35	5	0	1	2	0	0	0	0	0	0
862	14.3667	5	0	1	2	0	0	0	0	0	0
863	14.3833	5	0	1	2	0	0	0	0	0	0
864	14.4	5	0	1	2	0	0	0	0	0	0
865	14.4167	5	0	1	2	0	0	0	0	0	0
866	14.4333	5	0	1	2	0	0	0	0	0	0
867	14.45	5	0	1	2	0	0	0	0	0	0
868	14.4667	5	0	1	2	0	0	0	0	0	0
869	14.4833	5	0	1	2	0	0	0	0	0	0
870	14.5	5	0	0	1	0	0	0	0	0	0
871	14.5167	5	0	0	1	0	0	0	0	0	0
872	14.5333	5	0	0	1	0	0	0	0	0	0
873	14.55	5	0	0	1	0	0	0	0	0	0
874	14.5667	5	0	0	1	0	0	0	0	0	0
875	14.5833	5	0	0	1	0	0	0	0	0	0
876	14.6	5	0	0	1	0	0	0	0	0	0
877	14.6167	5	0	0	1	0	0	0	0	0	0
878	14.6333	5	0	1	1	0	0	0	0	0	0
879	14.65	5	0	1	1	0	0	0	0	0	0
880	14.6667	5	0	0	1	0	0	0	0	0	0
881	14.6833	5	0	0	2	0	0	0	0	0	0
882	14.7	5	0	0	2	0	0	0	0	0	0
883	14.7167	5	0	0	2	0	0	0	0	0	0
884	14.7333	5	0	0	2	0	0	0	0	0	0
885	14.75	5	0	0	2	0	0	0	0	0	0
886	14.7667	5	0	0	2	0	0	0	0	0	0
887	14.7833	5	0	0	2	0	0	0	0	0	0
888	14.8	5	0	0	2	0	0	0	0	0	0
889	14.8167	5	0	0	2	0	0	0	0	0	0
890	14.8333	5	0	0	2	0	0	0	0	0	0
891	14.85	5	0	0	2	0	0	0	0	0	0
892	14.8667	5	0	0	2	0	0	0	0	0	0
893	14.8833	5	0	0	2	0	0	0	0	0	0
894	14.9	5	0	0	2	0	0	0	0	0	0
895	14.9167	5	0	0	2	0	0	0	0	0	0
896	14.9333	5	0	0	2	0	0	0	0	0	0
897	14.95	5	0	0	2	0	0	0	0	0	0
898	14.9667	5	0	0	2	0	0	0	0	0	0
899	14.9833	5	0	0	3	0	0	0	0	0	0
900	15	5	0	0	3	0	0	0	0	0	0
901	15.0167	5	0	0	2	0	0	0	0	0	0
902	15.0333	5	0	0	2	0	0	0	0	0	0
903	15.05	5	0	0	2	0	0	0	0	0	0
904	15.0667	5	0	0	1	0	0	0	0	0	0
905	15.0833	5	0	0	1	0	0	0	0	0	0
906	15.1	5	0	0	0	0	0	0	0	0	0
907	15.1167	5	0	0	0	0	0	0	0	0	0
908	15.1333	5	0	0	0	0	0	0	0	0	0
909	15.15	5	0	0	0	0	0	0	0	0	0
910	15.1667	5	0	0	0	0	0	0	0	0	0
911	15.1833	5	0	0	0	0	0	0	0	0	0
912	15.2	5	0	0	0	0	0	0	0	0	0
913	15.2167	5	0	0	0	0	0	0	0	0	0
914	15.2333	5	0	0	0	0	0	0	0	0	0
915	15.25	5	0	0	0	0	0	0	0	0	0
916	15.2667	5	0	0	1	0	0	0	0	0	0
917	15.2833	5	0	0	1	0	0	0	0	0	0
918	15.3	5	0	0	1	0	0	0	0	0	0
919	15.3167	5	0	0	1	0	0	0	0	0	0
920	15.3333	5	0	1	1	0	0	0	0	0	0
921	15.35	5	0	1	1	0	0	0	0	0	0
922	15.3667	5	0	1	1	0	0	0	0	0	0
923	15.3833	5	0	1	1	0	0	0	0	0	0
924	15.4	5	0	0	1	0	0	0	0	0	0
925	15.4167	5	0	0	1	0	0	0	0	0	0
926	15.4333	5	0	0	1	0	0	0	0	0	0
927	15.45	5	0	0	1	0	0	0	0	0	0
928	15.4667	5	0	0	1	0	0	0	0	0	0
929	15.4833	5	0	0	1	0	0	0	0	0	0
930	15.5	5	0	0	1	0	0	0	0	0	0
931	15.5167	5	0	0	1	0	0	0	0	0	0
932	15.5333	5	0	0	1	0	0	0	0	0	0
933	15.55	5	0	0	1	0	0	0	0	0	0
934	15.5667	5	0	0	1	0	0	0	0	0	0
935	15.5833	5	0	0	1	0	0	0	0	0	0
936	15.6	5	0	0	1	0	0	0	0	0	0
937	15.6167	5	0	0	1	0	0	0	0	0	0
938	15.6333	5	0	0	1	0	0	0	0	0	0
939	15.65	5	0	0	1	0	0	0	0	0	0
940	15.6667	5	0	0	1	0	0	0	0	0	0
941	15.6833	5	0	0	1	0	0	0	0	0	0
942	15.7	5	0	0	1	0	0	0	0	0	0
943	15.7167	5	0	0	1	0	0	0	0	0	0
944	15.7333	5	0	0	1	0	0	0	0	0	0
945	15.75	5	0	0	1	0	0	0	0	0	0
946	15.7667	5	0	0	1	0	0	0	0	0	0
947	15.7833	5	0	0	1	0	0	0	0	0	0
948	15.8	5	0	0	1	0	0	0	0	0	0
949	15.8167	5	0	0	1	0	0	0	0	0	0
950	15.8333	5	0	0	1	0	0	0	0	0	0
951	15.85	5	0	0	1	0	0	0	0	0	0
952	15.8667	5	0	0	1	0	0	0	0	0	0
953	15.8833	5	0	0	1	0	0	0	0	0	0
954	15.9	5	0	0	1	0	0	0	0	0	0
955	15.9167	5	0	1	1	0	0	0	0	0	0
956	15.9333	5	0	1	1	0	0	0	0	0	0
957	15.95	5	0	1	1	0	0	0	0	0	0
958	15.9667	5	0	1	1	0	0	0	0	0	0
959	15.9833	5	0	2	1	0	0	0	0	0	0
960	16	5	0	2	1	0	0	0	0	0	0
961	16.0167	5	0	1	0	0	0	0	0	0	0
962	16.0333	5	0	1	0	0	0	0	0	0	0
963	16.05	5	0	1	0	0	0	0	0	0	0
964	16.0667	5	0	1	0	0	0	0	0	0	0
965	16.0833	5	0	1	0	0	0	0	0	0	0
966	16.1	5	0	1	0	0	0	0	0	0	0
967	16.1167	5	0	1	0	0	0	0	0	0	0
968	16.1333	5	0	1	1	0	0	0	0	0	0
969	16.15	5	0	1	1	0	0	0	0	0	0
970	16.1667	5	0	1	1	0	0	0	0	0	0
971	16.1833	5	0	1	1	0	0	0	0	0	0
972	16.2	5	0	1	1	0	0	0	0	0	0
973	16.2167	5	0	1	0	0	0	0	0	0	0
974	16.2333	5	0	1	0	0	0	0	0	0	0
975	16.25	5	0	1	0	0	0	0	0	0	0
976	16.2667	5	0	1	0	0	0	0	0	0	0
977	16.2833	5	0	2	0	0	0	0	0	0	0
978	16.3	5	0	1	0	0	0	0	0	0	0
979	16.3167	5	0	1	0	0	0	0	0	0	0
980	16.3333	5	0	0	0	0	0	0	0	0	0
981	16.35	5	0	0	0	0	0	0	0	0	0
982	16.3667	5	0	0	0	0	0	0	0	0	0
983	16.3833	5	0	0	0	0	0	0	0	0	0
984	16.4	5	0	0	0	0	0	0	0	0	0
985	16.4167	5	0	0	0	0	0	0	0	0	0
986	16.4333	5	0	0	0	0	0	0	0	0	0
987	16.45	5	0	0	0	0	0	0	0	0	0
988	16.4667	5	0	1	0	0	0	0	0	0	0
989	16.4833	5	0	1	0	0	0	0	0	0	0
990	16.5	5	0	1	0	0	0	0	0	0	0
991	16.5167	5	0	1	0	0	0	0	0	0	0
992	16.5333	5	0	1	0	0	0	0	0	0	0
993	16.55	5	0	1	0	0	0	0	0	0	0
994	16.5667	5	0	1	0	0	0	0	0	0	0
995	16.5833	5	0	1	0	0	0	0	0	0	0
996	16.6	5	0	1	0	0	0	0	0	0	0
997	16.6167	5	0	1	0	0	0	0	0	0	0
998	16.6333	5	0	1	0	0	0	0	0	0	0
999	16.65	5	0	1	0	0	0	0	0	0	0
1000	16.6667	5	0	1	0	0	0	0	0	0	0
1001	16.6833	5	0	0	0	0	0	0	0	0	0
1002	16.7	5	0	0	0	0	0	0	0	0	0
1003	16.7167	5	0	0	0	0	0	0	0	0	0
1004	16.7333	5	0	0	0	0	0	0	0	0	0
1005	16.75	5	0	0	0	0	0	0	0	0	0
1006	16.7667	5	0	0	0	0	0	0	0	0	0
1007	16.7833	5	0	0	0	0	0	0	0	0	0
1008	16.8	5	0	0	0	0	0	0	0	0	0
1009	16.8167	5	0	0	0	0	0	0	0	0	0
1010	16.8333	5	0	0	0	0	0	0	0	0	0
1011	16.85	5	0	0	0	0	0	0	0	0	0
1012	16.8667	5	0	0	0	0	0	0	0	0	0
1013	16.8833	5	0	0	0	0	0	0	0	0	0
1014	16.9	5	0	0	0	0	0	0	0	0	0
1015	16.9167	5	0	0	0	0	0	0	0	0	0
1016	16.9333	5	0	0	0	0	0	0	0	0	0
1017	16.95	5	0	0	0	0	0	0	0	0	0
1018	16.9667	5	0	0	0	0	0	0	0	0	0
1019	16.9833	5	0	0	0	0	0	0	0	0	0
1020	17	5	0	0	0	0	0	0	0	0	0
1021	17.0167	5	0	0	0	0	0	0	0	0	0
1022	17.0333	5	0	0	0	0	0	0	0	0	0
1023	17.05	5	0	0	0	0	0	0	0	0	0
1024	17.0667	5	0	0	0	0	0	0	0	0	0
1025	17.0833	5	0	0	0	0	0	0	0	0	0
1026	17.1	5	0	0	0	0	0	0	0	0	0
1027	17.1167	5	0	0	0	0	0	0	0	0	0
1028	17.1333	5	0	1	0	0	0	0	0	0	0
1029	17.15	5	0	1	0	0	0	0	0	0	0
1030	17.1667	5	0	1	0	0	0	0	0	0	0
1031	17.1833	5	0	1	0	0	0	0	0	0	0
1032	17.2	5	0	1	0	0	0	0	0	0	0
1033	17.2167	5	0	1	0	0	0	0	0	0	0
1034	17.2333	5	0	1	0	0	0	0	0	0	0
1035	17.25	5	0	1	0	0	0	0	0	0	0
1036	17.2667	5	0	1	0	0	0	0	0	0	0
1037	17.2833	5	0	1	0	0	0	0	0	0	0
1038	17.3	5	0	1	0	0	0	0	0	0	0
1039	17.3167	5	0	1	0	0	0	0	0	0	0
1040	17.3333	5	0	1	0	0	0	0	0	0	0
1041	17.35	5	0	1	0	0	0	0	0	0	0
1042	17.3667	5	0	1	0	0	0	0	0	0	0
1043	17.3833	5	0	1	0	0	0	0	0	0	0
1044	17.4	5	0	1	0	0	0	0	0	0	0
1045	17.4167	5	0	1	0	0	0	0	0	0	0
1046	17.4333	5	0	1	0	0	0	0	0	0	0
1047	17.45	5	0	1	0	0	0	0	0	0	0
1048	17.4667	5	0	1	0	0	0	0	0	0	0
1049	17.4833	5	0	0	0	0	0	0	0	0	0
1050	17.5	5	0	0	0	0	0	0	0	0	0
1051	17.5167	5	0	1	0	0	0	0	0	0	0
1052	17.5333	5	0	1	0	0	0	0	0	0	0
1053	17.55	5	0	1	0	0	0	0	0	0	0
1054	17.5667	5	0	1	0	0	0	0	0	0	0
1055	17.5833	5	0	1	0	0	0	0	0	0	0
1056	17.6	5	0	1	0	0	0	0	0	0	0
1057	17.6167	5	0	1	0	0	0	0	0	0	0
1058	17.6333	5	0	3	0	0	0	0	0	0	0
1059	17.65	5	0	3	0	0	0	0	0	0	0
1060	17.6667	5	0	1	0	0	0	0	0	0	0
1061	17.6833	5	0	2	0	0	0	0	0	0	0
1062	17.7	5	0	2	0	0	0	0	0	0	0
1063	17.7167	5	0	2	0	0	0	0	0	0	0
1064	17.7333	5	0	2	0	0	0	0	0	0	0
1065	17.75	5	0	2	0	0	0	0	0	0	0
1066	17.7667	5	0	2	0	0	0	0	0	0	0
1067	17.7833	5	0	2	0	0	0	0	0	0	0
1068	17.8	5	0	2	0	0	0	0	0	0	0
1069	17.8167	5	0	0	0	0	0	0	0	0	0
1070	17.8333	5	0	0	0	0	0	0	0	0	0
1071	17.85	5	0	0	0	0	0	0	0	0	0
1072	17.8667	5	0	0	0	0	0	0	0	0	0
1073	17.8833	5	0	0	0	0	0	0	0	0	0
1074	17.9	5	0	0	0	0	0	0	0	0	0
1075	17.9167	5	0	0	0	0	0	0	0	0	0
1076	17.9333	5	0	0	0	0	0	0	0	0	0
1077	17.95	5	0	0	0	0	0	0	0	0	0
1078	17.9667	5	0	0	0	0	0	0	0	0	0
1079	17.9833	5	0	0	0	0	0	0	0	0	0
1080	18	5	0	0	0	0	0	0	0	0	0
1081	18.0167	5	0	0	0	0	0	0	0	0	0
1082	18.0333	5	0	0	0	0	0	0	0	0	0
1083	18.05	5	0	0	0	0	0	0	0	0	0
1084	18.0667	5	0	0	0	0	0	0	0	0	0
1085	18.0833	5	0	1	0	0	0	0	0	0	0
1086	18.1	5	0	1	0	0	0	0	0	0	0
1087	18.1167	5	0	1	0	0	0	0	0	0	0
1088	18.1333	5	0	1	0	0	0	0	0	0	0
1089	18.15	5	0	0	0	0	0	0	0	0	0
1090	18.1667	5	0	0	0	0	0	0	0	0	0
1091	18.1833	5	0	0	0	0	0	0	0	0	0
1092	18.2	5	0	0	0	0	0	0	0	0	0
1093	18.2167	5	0	0	0	0	0	0	0	0	0
1094	18.2333	5	0	0	0	0	0	0	0	0	0
1095	18.25	5	0	0	0	0	0	0	0	0	0
1096	18.2667	5	0	0	0	0	0	0	0	0	0
1097	18.2833	5	0	0	0	0	0	0	0	0	0
1098	18.3	5	0	0	0	0	0	0	0	0	0
1099	18.3167	5	0	0	0	0	0	0	0	0	0
1100	18.3333	5	0	0	0	0	0	0	0	0	0
1101	18.35	5	0	0	0	0	0	0	0	0	0
1102	18.3667	5	0	2	0	0	0	0	0	0	0
1103	18.3833	5	0	2	0	0	0	0	0	0	0
1104	18.4	5	0	2	0	0	0	0	0	0	0
1105	18.4167	5	0	2	0	0	0	0	0	0	0
1106	18.4333	5	0	2	0	0	0	0	0	0	0
1107	18.45	5	0	2	0	0	0	0	0	0	0
1108	18.4667	5	0	2	0	0	0	0	0	0	0
1109	18.4833	5	0	3	0	0	0	0	0	0	0
1110	18.5	5	0	3	0	0	0	0	0	0	0
1111	18.5167	5	0	3	0	0	0	0	0	0	0
1112	18.5333	5	0	1	0	0	0	0	0	0	0
1113	18.55	5	0	1	0	0	0	0	0	0	0
1114	18.5667	5	0	1	0	0	0	0	0	0	0
1115	18.5833	5	0	1	0	0	0	0	0	0	0
1116	18.6	5	0	1	0	0	0	0	0	0	0
1117	18.6167	5	0	1	0	0	0	0	0	0	0
1118	18.6333	5	0	1	0	0	0	0	0	0	0
1119	18.65	5	0	1	0	0	0	0	0	0	0
1120	18.6667	5	0	1	0	0	0	0	0	0	0
1121	18.6833	5	0	1	0	0	0	0	0	0	0
1122	18.7	5	0	1	0	0	0	0	0	0	0
1123	18.7167	5	0	1	0	0	0	0	0	0	0
1124	18.7333	5	0	1	0	0	0	0	0	0	0
1125	18.75	5	0	1	0	0	0	0	0	0	0
1126	18.7667	5	0	1	0	0	0	0	0	0	0
1127	18.7833	5	0	1	0	0	0	0	0	0	0
1128	18.8	5	0	1	0	0	0	0	0	0	0
1129	18.8167	5	0	1	0	0	0	0	0	0	0
1130	18.8333	5	0	1	0	0	0	0	0	0	0
1131	18.85	5	0	1	0	0	0	0	0	0	0
1132	18.8667	5	0	1	0	0	0	0	0	0	0
1133	18.8833	5	0	1	0	0	0	0	0	0	0
1134	18.9	5	0	1	0	0	0	0	0	0	0
1135	18.9167	5	0	1	0	0	0	0	0	0	0
1136	18.9333	5	0	1	0	0	0	0	0	0	0
1137	18.95	5	0	1	0	0	0	0	0	0	0
1138	18.9667	5	0	1	0	0	0	0	0	0	0
1139	18.9833	5	0	1	0	0	0	0	0	0	0
1140	19	5	0	1	0	0	0	0	0	0	0
1141	19.0167	5	0	1	1	0	0	0	0	0	0
1142	19.0333	5	0	1	1	0	0	0	0	0	0
1143	19.05	5	0	1	1	0	0	0	0	0	0
1144	19.0667	5	0	1	1	0	0	0	0	0	0
1145	19.0833	5	0	1	1	0	0	0	0	0	0
1146	19.1	5	0	1	1	0	0	0	0	0	0
1147	19.1167	5	0	1	1	0	0	0	0	0	0
1148	19.1333	5	0	1	1	0	0	0	0	0	0
1149	19.15	5	0	1	1	0	0	0	0	0	0
1150	19.1667	5	0	1	1	0	0	0	0	0	0
1151	19.1833	5	0	1	1	0	0	0	0	0	0
1152	19.2	5	0	1	1	0	0	0	0	0	0
1153	19.2167	5	0	1	1	0	0	0	0	0	0
1154	19.2333	5	0	1	1	0	0	0	0	0	0
1155	19.25	5	0	1	1	0	0	0	0	0	0
1156	19.2667	5	0	1	1	0	0	0	0	0	0
1157	19.2833	5	0	1	1	0	0	0	0	0	0
1158	19.3	5	0	1	1	0	0	0	0	0	0
1159	19.3167	5	0	1	1	0	0	0	0	0	0
1160	19.3333	5	0	1	1	0	0	0	0	0	0
1161	19.35	5	0	1	1	0	0	0	0	0	0
1162	19.3667	5	0	1	1	0	0	0	0	0	0
1163	19.3833	5	0	1	1	0	0	0	0	0	0
1164	19.4	5	0	1	1	0	0	0	0	0	0
1165	19.4167	5	0	1	1	0	0	0	0	0	0
1166	19.4333	5	0	1	1	0	0	0	0	0	0
1167	19.45	5	0	1	1	0	0	0	0	0	0
1168	19.4667	5	0	1	1	0	0	0	0	0	0
1169	19.4833	5	0	0	1	0	0	0	0	0	0
1170	19.5	5	0	0	1	0	0	0	0	0	0
1171	19.5167	5	0	0	1	0	0	0	0	0	0
1172	19.5333	5	0	0	1	0	0	0	0	0	0
1173	19.55	5	0	0	1	0	0	0	0	0	0
1174	19.5667	5	0	0	1	0	0	0	0	0	0
1175	19.5833	5	0	0	1	0	0	0	0	0	0
1176	19.6	5	0	0	0	0	0	0	0	0	0
1177	19.6167	5	0	0	0	0	0	0	0	0	0
1178	19.6333	5	0	0	0	0	0	0	0	0	0
1179	19.65	5	0	0	0	0	0	0	0	0	0
1180	19.6667	5	0	0	0	0	0	0	0	0	0
1181	19.6833	5	0	0	0	0	0	9	0	0	0
1182	19.7	5	0	0	0	0	0	9	0	0	0
1183	19.7167	5	0	0	0	0	0	9	0	0	0
1184	19.7333	5	0	0	0	0	0	9	0	0	0
1185	19.75	5	0	0	0	0	0	9	0	0	0
1186	19.7667	5	0	0	0	0	0	9	0	0	0
1187	19.7833	5	0	0	0	0	0	9	0	0	0
1188	19.8	5	0	0	0	0	0	9	0	0	0
1189	19.8167	5	0	0	0	0	0	9	0	0	0
1190	19.8333	5	0	0	0	0	0	9	0	0	0
1191	19.85	5	0	0	0	0	0	9	0	0	0
1192	19.8667	5	0	0	0	0	0	9	0	0	0
1193	19.8833	5	0	0	0	0	0	9	0	0	0
1194	19.9	5	0	0	0	0	0	9	0	0	0
1195	19.9167	5	0	0	0	0	0	9	0	0	0
1196	19.9333	5	0	0	0	0	0	9	0	0	0
1197	19.95	5	0	0	0	0	0	9	0	0	0
1198	19.9667	5	0	0	0	0	0	9	0	0	0
1199	19.9833	5	0	1	0	0	0	9	0	0	0
1200	20	5	0	1	0	0	0	9	0	0	0
1201	20.0167	5	0	1	0	0	0	9	0	0	0
1202	20.0333	5	0	1	0	0	0	9	0	0	0
1203	20.05	5	0	1	0	0	0	9	0	0	0
1204	20.0667	5	0	1	0	0	0	9	0	0	0
1205	20.0833	5	0	1	0	0	0	9	0	0	0
1206	20.1	5	0	1	0	0	0	9	0	0	0
1207	20.1167	5	0	1	0	0	0	9	0	0	0
1208	20.1333	5	0	1	0	0	0	9	0	0	0
1209	20.15	5	0	1	0	0	0	9	0	0	0
1210	20.1667	5	0	1	0	0	0	9	0	0	0
1211	20.1833	5	0	0	0	0	0	2	0	0	0
1212	20.2	5	0	0	0	0	0	2	0	0	0
1213	20.2167	5	0	0	0	0	0	2	0	0	0
1214	20.2333	5	0	0	0	0	0	2	0	0	0
1215	20.25	5	0	0	0	0	0	2	0	0	0
1216	20.2667	5	0	0	0	0	0	2	0	0	0
1217	20.2833	5	0	0	0	0	0	2	0	0	0
1218	20.3	5	0	0	0	0	0	2	0	0	0
1219	20.3167	5	0	1	0	0	0	2	0	0	0
1220	20.3333	5	0	1	0	0	0	2	0	0	0
1221	20.35	5	0	1	0	0	0	2	0	0	0
1222	20.3667	5	0	1	0	0	0	2	0	0	0
1223	20.3833	5	0	1	0	0	0	2	0	0	0
1224	20.4	5	0	1	0	0	0	2	0	0	0
1225	20.4167	5	0	1	0	0	0	2	0	0	0
1226	20.4333	5	0	1	0	0	0	2	0	0	0
1227	20.45	5	0	1	0	0	0	2	0	0	0
1228	20.4667	5	0	1	0	0	0	2	0	0	0
1229	20.4833	5	0	1	0	0	0	2	0	0	0
1230	20.5	5	0	1	0	0	0	2	0	0	0
1231	20.5167	5	0	1	0	0	0	2	0	0	0
1232	20.5333	5	0	1	0	0	0	2	0	0	0
1233	20.55	5	0	1	0	0	0	2	0	0	0
1234	20.5667	5	0	2	0	0	0	2	0	0	0
1235	20.5833	5	0	2	0	0	0	2	0	0	0
1236	20.6	5	0	2	0	0	0	2	0	0	0
1237	20.6167	5	0	2	0	0	0	2	0	0	0
1238	20.6333	5	0	2	0	0	0	2	0	0	0
1239	20.65	5	0	2	0	0	0	2	0	0	0
1240	20.6667	5	0	1	0	0	0	2	0	0	0
1241	20.6833	5	0	1	0	0	0	1	0	0	0
1242	20.7	5	0	1	0	0	0	1	0	0	0
1243	20.7167	5	0	1	0	0	0	1	0	0	0
1244	20.7333	5	0	1	0	0	0	1	0	0	0
1245	20.75	5	0	1	0	0	0	1	0	0	0
1246	20.7667	5	0	1	0	0	0	1	0	0	0
1247	20.7833	5	0	1	0	0	0	1	0	0	0
1248	20.8	5	0	1	0	0	0	1	0	0	0
1249	20.8167	5	0	1	0	0	0	1	0	0	0
1250	20.8333	5	0	0	0	0	0	1	0	0	0
1251	20.85	5	0	0	0	0	0	1	0	0	0
1252	20.8667	5	0	0	0	0	0	1	0	0	0
1253	20.8833	5	0	0	0	0	0	1	0	0	0
1254	20.9	5	0	0	0	0	0	1	0	0	0
1255	20.9167	5	0	0	0	0	0	1	0	0	0
1256	20.9333	5	0	0	0	0	0	1	0	0	0
1257	20.95	5	0	0	0	0	0	1	0	0	0
1258	20.9667	5	0	0	0	0	0	1	0	0	0
1259	20.9833	5	0	0	0	0	0	1	0	0	0
1260	21	5	0	0	0	0	0	1	0	0	0
1261	21.0167	5	0	0	0	0	0	1	0	0	0
1262	21.0333	5	0	0	1	1	0	1	0	0	0
1263	21.05	5	0	0	1	1	0	1	0	0	0
1264	21.0667	5	0	0	1	1	0	1	0	0	0
1265	21.0833	5	0	0	1	1	0	1	0	0	0
1266	21.1	5	0	0	1	1	0	1	0	0	0
1267	21.1167	5	0	0	1	1	0	1	0	0	0
1268	21.1333	5	0	0	1	1	0	1	0	0	0
1269	21.15	5	0	0	1	1	0	1	0	0	0
1270	21.1667	5	0	4	1	1	0	0	0	0	0
1271	21.1833	5	0	4	1	1	0	0	0	0	0
1272	21.2	5	0	4	1	0	0	0	0	0	0
1273	21.2167	5	0	0	1	0	0	0	0	0	0
1274	21.2333	5	0	0	1	0	0	0	0	0	0
1275	21.25	5	0	0	1	0	0	0	0	0	0
1276	21.2667	5	0	0	1	0	0	3	0	0	0
1277	21.2833	5	0	0	1	0	0	3	0	0	0
1278	21.3	5	0	0	1	0	0	3	0	0	0
1279	21.3167	5	0	0	1	0	0	3	0	0	0
1280	21.3333	5	0	0	1	0	0	3	0	0	0
1281	21.35	5	0	0	1	0	0	3	0	0	0
1282	21.3667	5	0	0	0	0	0	3	0	0	0
1283	21.3833	5	0	0	0	0	0	3	0	0	0
1284	21.4	5	0	0	0	0	0	3	0	0	0
1285	21.4167	5	0	0	0	0	0	3	0	0	0
1286	21.4333	5	0	0	0	0	0	3	0	0	0
1287	21.45	5	0	0	0	0	0	3	0	0	0
1288	21.4667	5	0	0	0	0	0	3	0	0	0
1289	21.4833	5	0	0	0	0	0	3	0	0	0
1290	21.5	5	0	0	0	0	0	3	0	0	0
1291	21.5167	5	0	0	0	0	0	3	0	0	0
1292	21.5333	5	0	0	0	0	0	3	0	0	0
1293	21.55	5	0	0	0	0	0	3	0	0	0
1294	21.5667	5	0	0	0	0	0	3	0	0	0
1295	21.5833	5	0	0	0	0	0	3	0	0	0
1296	21.6	5	0	0	0	0	0	3	0	0	0
1297	21.6167	5	0	1	0	0	0	3	0	0	0
1298	21.6333	5	0	1	0	0	0	3	0	0	0
1299	21.65	5	0	1	0	0	0	3	0	0	0
1300	21.6667	5	0	1	0	0	0	3	0	0	0
1301	21.6833	5	0	1	0	0	0	3	0	0	0
1302	21.7	5	0	1	0	0	0	3	0	0	0
1303	21.7167	5	0	1	0	0	0	3	0	0	0
1304	21.7333	5	0	1	0	0	0	3	0	0	0
1305	21.75	5	0	1	0	0	0	0	0	0	0
1306	21.7667	5	0	1	0	0	0	1	0	0	0
1307	21.7833	5	0	1	0	0	0	1	0	0	0
1308	21.8	5	0	1	0	0	0	1	0	0	0
1309	21.8167	5	0	1	0	0	0	1	0	0	0
1310	21.8333	5	0	1	0	0	0	1	0	0	0
1311	21.85	5	0	1	0	0	0	1	0	0	0
1312	21.8667	5	0	2	0	0	0	1	0	0	0
1313	21.8833	5	0	2	0	0	0	1	0	0	0
1314	21.9	5	0	2	0	0	0	1	0	0	0
1315	21.9167	5	0	1	0	0	0	1	0	0	0
1316	21.9333	5	0	1	0	0	0	1	0	0	0
1317	21.95	5	0	1	0	0	0	1	0	0	0
1318	21.9667	5	0	1	0	0	0	1	0	0	0
1319	21.9833	5	0	1	0	0	0	1	0	0	0
1320	22	5	0	1	0	0	0	1	0	0	0
1321	22.0167	5	0	1	0	0	0	1	0	0	0
1322	22.0333	5	0	1	0	0	0	1	0	0	0
1323	22.05	5	0	1	0	0	0	1	0	0	0
1324	22.0667	5	0	1	0	0	0	1	0	0	0
1325	22.0833	5	0	1	0	0	0	1	0	0	0
1326	22.1	5	0	1	0	0	0	1	0	0	0
1327	22.1167	5	0	1	0	1	0	1	0	0	0
1328	22.1333	5	0	1	0	1	0	1	0	0	0
1329	22.15	5	0	1	0	1	0	1	0	0	0
1330	22.1667	5	0	1	0	1	0	1	0	0	0
1331	22.1833	5	0	1	0	0	0	1	0	0	0
1332	22.2	5	0	1	0	0	0	1	0	0	0
1333	22.2167	5	0	0	0	0	0	1	0	0	0
1334	22.2333	5	0	0	0	0	0	1	0	0	0
1335	22.25	5	0	0	0	0	0	0	0	0	0
1336	22.2667	5	0	0	0	0	0	0	0	0	0
1337	22.2833	5	0	0	0	0	0	0	5	0	0
1338	22.3	5	0	0	0	0	0	0	5	0	0
1339	22.3167	5	0	0	0	0	0	0	5	0	0
1340	22.3333	5	0	0	0	0	0	0	5	0	0
1341	22.35	5	0	0	0	0	0	0	5	0	0
1342	22.3667	5	0	0	0	0	0	0	5	0	0
1343	22.3833	5	0	0	0	0	0	0	5	0	0
1344	22.4	5	0	0	0	0	0	0	5	0	0
1345	22.4167	5	0	0	0	0	0	0	0	0	0
1346	22.4333	5	0	0	0	0	0	0	0	0	0
1347	22.45	5	0	0	0	0	0	0	0	0	0
1348	22.4667	5	0	0	0	0	0	0	0	0	0
1349	22.4833	5	0	1	0	0	0	0	0	0	0
1350	22.5	5	0	1	0	0	0	0	0	0	0
1351	22.5167	5	0	1	0	0	0	0	0	0	0
1352	22.5333	5	0	1	0	0	0	0	0	0	0
1353	22.55	5	0	1	0	0	0	0	0	0	0
1354	22.5667	5	0	1	0	0	0	0	0	0	0
1355	22.5833	5	0	0	0	0	0	0	0	0	0
1356	22.6	5	0	0	0	0	0	0	0	0	0
1357	22.6167	5	0	0	0	0	0	0	0	0	0
1358	22.6333	5	0	1	0	0	0	0	0	0	0
1359	22.65	5	0	1	0	0	0	0	0	0	0
1360	22.6667	5	0	1	0	0	0	0	0	0	0
1361	22.6833	5	0	1	0	0	0	0	0	0	0
1362	22.7	5	0	0	0	0	0	0	0	0	0
1363	22.7167	5	0	0	0	0	0	0	0	0	0
1364	22.7333	5	0	0	0	0	0	0	0	0	0
1365	22.75	5	0	0	0	0	0	0	0	0	0
1366	22.7667	5	0	0	0	0	0	0	0	0	0
1367	22.7833	5	0	0	0	0	0	0	0	0	0
1368	22.8	5	0	0	0	0	0	0	0	0	0
1369	22.8167	5	0	0	0	0	0	0	0	0	0
1370	22.8333	5	0	0	0	0	0	0	0	0	0
1371	22.85	5	0	0	0	0	0	0	0	0	0
1372	22.8667	5	0	0	0	0	0	0	0	0	0
1373	22.8833	5	0	1	0	0	0	0	0	0	0
1374	22.9	5	0	1	0	0	0	0	0	0	0
1375	22.9167	5	0	1	0	0	0	0	0	0	0
1376	22.9333	5	0	1	0	0	0	0	0	0	0
1377	22.95	5	0	1	0	0	0	0	0	0	0
1378	22.9667	5	0	1	0	0	0	0	0	0	0
1379	22.9833	5	0	1	0	0	0	0	0	0	0
1380	23	5	0	1	0	0	0	0	0	0	0
1381	23.0167	5	0	1	0	0	0	0	0	0	0
1382	23.0333	5	0	1	0	0	0	0	0	0	0
1383	23.05	5	0	1	0	0	0	0	0	0	0
1384	23.0667	5	0	1	0	0	0	0	0	0	0
1385	23.0833	5	0	1	0	0	0	0	0	0	0
1386	23.1	5	0	1	0	0	0	0	0	0	0
1387	23.1167	5	0	1	0	0	0	0	0	0	0
1388	23.1333	5	0	1	0	0	0	0	0	0	0
1389	23.15	5	0	1	0	0	0	0	0	0	0
1390	23.1667	5	0	1	0	0	0	0	0	0	0
1391	23.1833	5	0	1	0	0	0	0	0	0	0
1392	23.2	5	0	1	0	0	0	0	0	0	0
1393	23.2167	5	0	1	0	0	0	0	0	0	0
1394	23.2333	5	0	1	0	0	0	0	0	0	0
1395	23.25	5	0	1	0	0	0	0	0	0	0
1396	23.2667	5	0	1	0	0	0	0	0	0	0
1397	23.2833	5	0	1	0	0	0	0	0	0	0
1398	23.3	5	0	1	0	0	0	0	0	0	0
1399	23.3167	5	0	1	0	0	0	0	0	0	0
1400	23.3333	5	0	1	0	0	0	0	0	0	0
1401	23.35	5	0	1	0	0	0	0	0	0	0
1402	23.3667	5	0	1	0	0	0	0	0	0	0
1403	23.3833	5	0	1	0	0	0	0	0	0	0
1404	23.4	5	0	1	0	0	0	0	0	0	0
1405	23.4167	5	0	1	0	0	0	0	0	0	0
1406	23.4333	5	0	1	0	0	0	0	0	0	0
1407	23.45	5	0	1	0	0	0	0	0	0	0
1408	23.4667	5	0	1	0	0	0	0	0	0	0
1409	23.4833	5	0	1	0	0	0	0	0	0	0
1410	23.5	5	0	1	0	0	0	0	0	0	0
1411	23.5167	5	0	1	0	0	0	0	0	0	0
1412	23.5333	5	0	1	0	0	0	0	0	0	0
1413	23.55	5	0	1	0	0	0	0	0	0	0
1414	23.5667	5	0	1	0	0	0	0	0	0	0
1415	23.5833	5	0	1	0	0	0	0	0	0	0
1416	23.6	5	0	1	0	0	0	0	0	0	0
1417	23.6167	5	0	1	0	0	0	0	0	0	0
1418	23.6333	5	0	1	0	0	0	0	0	0	0
1419	23.65	5	0	1	0	0	0	0	0	0	0
1420	23.6667	5	0	1	0	0	0	0	0	0	0
1421	23.6833	5	0	3	0	0	0	0	0	0	0
1422	23.7	5	0	3	0	0	0	0	0	0	0
1423	23.7167	5	0	3	0	0	0	0	0	0	0
1424	23.7333	5	0	2	0	0	0	0	0	0	0
1425	23.75	5	0	2	0	0	0	0	0	0	0
1426	23.7667	5	0	2	0	0	0	0	0	0	0
1427	23.7833	5	0	2	0	0	0	0	0	0	0
1428	23.8	5	0	2	0	0	0	0	0	0	0
1429	23.8167	5	0	2	0	0	0	0	0	0	0
1430	23.8333	5	0	2	0	0	0	0	0	0	0
1431	23.85	5	0	2	0	0	0	0	0	0	0
1432	23.8667	5	0	2	0	0	0	0	0	0	0
1433	23.8833	5	0	2	0	0	0	0	0	0	0
1434	23.9	5	0	2	0	0	0	0	0	0	0
1435	23.9167	5	0	0	0	0	0	0	0	0	0
1436	23.9333	5	0	0	0	0	0	0	0	0	0
1437	23.95	5	0	0	0	0	0	0	0	0	0
1438	23.9667	5	0	0	0	0	0	0	0	0	0
1439	23.9833	5	0	0	0	0	0	0	0	0	0
1440	24	5	0	0	0	0	0	0	0	0	0
1441	24.0167	2	0	0	0	0	0	0	0	0	0
1442	24.0333	2	0	0	0	0	0	0	0	0	0
1443	24.05	2	0	0	0	0	0	0	0	0	0
1444	24.0667	2	0	0	0	0	0	0	0	0	0
1445	24.0833	2	0	1	0	0	0	0	0	0	0
1446	24.1	2	0	1	0	0	0	0	0	0	0
1447	24.1167	2	0	1	0	0	0	0	0	0	0
1448	24.1333	2	0	1	0	0	0	0	0	0	0
1449	24.15	2	0	2	0	0	0	0	0	0	0
1450	24.1667	2	0	2	0	0	0	0	0	0	0
1451	24.1833	2	0	2	0	0	0	0	0	0	0
1452	24.2	2	0	2	0	0	0	0	0	0	0
1453	24.2167	2	0	2	0	0	0	0	0	0	0
1454	24.2333	2	0	2	0	0	0	0	0	0	0
1455	24.25	2	0	1	0	0	0	0	0	0	0
1456	24.2667	2	0	1	0	0	0	0	0	0	0
1457	24.2833	2	0	1	0	0	0	0	0	0	0
1458	24.3	2	0	1	0	0	0	0	0	0	0
1459	24.3167	2	0	1	0	0	0	0	0	0	0
1460	24.3333	2	0	1	0	0	0	0	0	0	0
1461	24.35	2	0	1	0	0	0	0	0	0	0
1462	24.3667	2	0	1	0	0	0	0	0	0	0
1463	24.3833	2	0	2	0	0	0	0	0	0	0
1464	24.4	2	0	2	0	0	0	0	0	0	0
1465	24.4167	2	0	2	0	0	0	0	0	0	0
1466	24.4333	2	0	1	0	0	0	0	0	0	0
1467	24.45	2	0	1	0	0	0	0	0	0	0
1468	24.4667	2	0	1	0	0	0	0	0	0	0
1469	24.4833	2	0	0	0	0	0	0	0	0	0
1470	24.5	2	0	1	0	0	0	0	0	0	0
1471	24.5167	2	0	1	0	0	0	0	0	0	0
1472	24.5333	2	0	0	0	0	0	0	0	0	0
1473	24.55	2	0	0	0	0	0	0	0	0	0
1474	24.5667	2	0	0	0	0	0	0	0	0	0
1475	24.5833	2	0	0	0	0	0	0	0	0	0
1476	24.6	2	0	0	0	0	0	0	0	0	0
1477	24.6167	2	0	0	0	0	0	0	0	0	0
1478	24.6333	2	0	0	0	0	0	0	0	0	0
1479	24.65	2	0	0	0	0	0	0	0	0	0
1480	24.6667	2	0	0	0	0	0	0	0	0	0
1481	24.6833	2	0	0	0	0	0	0	0	0	0
1482	24.7	2	0	0	0	0	0	0	0	0	0
1483	24.7167	2	0	0	0	0	0	0	0	0	0
1484	24.7333	2	0	0	0	0	0	0	0	0	0
1485	24.75	2	0	0	0	0	0	0	0	0	0
1486	24.7667	2	0	0	0	0	0	0	0	0	0
1487	24.7833	2	0	0	0	0	0	0	0	0	0
1488	24.8	2	0	0	0	0	0	0	0	0	0
1489	24.8167	2	0	0	0	0	0	0	0	0	0
1490	24.8333	2	0	0	0	0	0	0	0	0	2
1491	24.85	2	0	0	0	0	0	0	0	0	2
1492	24.8667	2	0	0	0	0	0	0	0	0	2
1493	24.8833	2	0	0	0	0	0	0	0	0	2
1494	24.9	2	0	0	0	0	0	0	0	0	2
1495	24.9167	2	0	0	0	0	0	0	0	0	2
1496	24.9333	2	0	0	0	0	0	0	0	0	0
1497	24.95	2	0	0	0	0	0	0	0	0	0
1498	24.9667	2	0	0	0	0	0	0	0	0	0
1499	24.9833	2	0	0	0	0	0	0	0	0	0
1500	25	2	0	0	0	0	0	0	0	0	0
1501	25.0167	2	0	0	0	0	0	0	0	0	0
1502	25.0333	2	0	1	0	0	0	0	0	0	0
1503	25.05	2	0	1	0	0	0	0	0	0	0
1504	25.0667	2	0	1	0	0	0	0	0	0	0
1505	25.0833	2	0	2	0	0	0	0	0	0	0
1506	25.1	2	0	2	0	0	0	0	0	0	0
1507	25.1167	2	0	1	0	0	0	0	0	0	0
1508	25.1333	2	0	1	0	0	0	0	0	0	0
1509	25.15	2	0	1	0	0	0	0	0	0	0
1510	25.1667	2	0	1	0	0	0	0	0	0	0
1511	25.1833	2	0	1	0	0	0	0	0	0	0
1512	25.2	2	0	1	0	0	0	0	0	0	0
1513	25.2167	2	0	1	0	0	0	0	0	0	0
1514	25.2333	2	0	1	0	0	0	0	0	0	0
1515	25.25	2	0	1	0	0	0	0	0	0	0
1516	25.2667	2	0	1	0	0	0	0	0	0	0
1517	25.2833	2	0	1	0	0	0	0	0	0	0
1518	25.3	2	0	1	0	0	0	0	0	0	0
1519	25.3167	2	0	1	0	0	0	0	0	0	0
1520	25.3333	2	0	1	0	0	0	0	0	0	0
1521	25.35	2	0	1	0	0	0	0	0	0	0
1522	25.3667	2	0	1	0	0	0	0	0	0	0
1523	25.3833	2	0	1	0	0	0	0	0	0	0
1524	25.4	2	0	1	0	0	0	0	0	0	0
1525	25.4167	2	0	1	0	0	0	0	0	0	0
1526	25.4333	2	0	1	0	0	0	0	0	0	0
1527	25.45	2	0	1	0	0	0	0	0	0	0
1528	25.4667	2	0	1	0	0	0	0	0	0	0
1529	25.4833	2	0	1	0	0	0	0	0	0	0
1530	25.5	2	0	1	0	0	0	0	0	0	0
1531	25.5167	2	0	1	0	0	0	0	0	0	0
1532	25.5333	2	0	1	0	0	0	0	0	0	0
1533	25.55	2	0	1	0	0	0	0	0	0	0
1534	25.5667	2	0	1	0	0	0	0	0	0	0
1535	25.5833	2	0	1	0	0	0	0	0	0	0
1536	25.6	2	0	1	0	0	0	0	0	0	0
1537	25.6167	2	0	1	0	0	0	0	0	0	0
1538	25.6333	2	0	1	0	0	0	0	0	0	0
1539	25.65	2	0	1	0	0	0	0	0	0	0
1540	25.6667	2	0	1	0	0	0	0	0	0	0
1541	25.6833	2	0	1	0	0	0	0	0	0	0
1542	25.7	2	0	1	0	0	0	0	0	0	0
1543	25.7167	2	0	1	0	0	0	0	0	0	0
1544	25.7333	2	0	1	0	0	0	0	0	0	0
1545	25.75	2	0	1	0	0	0	0	0	0	0
1546	25.7667	2	0	1	0	0	0	0	0	0	0
1547	25.7833	2	0	1	0	0	0	0	0	0	0
1548	25.8	2	0	1	0	0	0	0	0	0	0
1549	25.8167	2	0	1	0	0	0	0	0	0	0
1550	25.8333	2	0	1	0	0	0	0	0	0	0
1551	25.85	2	0	1	0	0	0	0	0	0	0
1552	25.8667	2	0	0	0	0	0	0	0	0	0
1553	25.8833	2	0	2	0	0	0	0	0	0	0
1554	25.9	2	0	2	0	0	0	0	0	0	0
1555	25.9167	2	0	2	0	0	0	0	0	0	0
1556	25.9333	2	0	2	0	0	0	0	0	0	0
1557	25.95	2	0	2	0	0	0	0	0	0	0
1558	25.9667	2	0	2	0	0	0	0	0	0	0
1559	25.9833	2	0	2	0	0	0	0	0	0	0
1560	26	2	0	2	0	0	0	0	0	0	0
1561	26.0167	2	0	4	0	1	0	0	0	0	0
1562	26.0333	2	0	4	0	1	0	0	0	0	0
1563	26.05	2	0	4	0	1	0	0	0	0	0
1564	26.0667	2	0	4	0	1	0	0	0	0	0
1565	26.0833	2	0	4	0	1	0	0	0	0	0
1566	26.1	2	0	4	0	1	0	0	0	0	0
1567	26.1167	2	0	4	0	1	0	0	0	0	0
1568	26.1333	2	0	4	0	1	0	0	0	0	0
1569	26.15	2	0	4	0	1	0	0	0	0	0
1570	26.1667	2	0	3	0	1	0	0	0	0	0
1571	26.1833	2	0	3	0	1	0	0	0	0	0
1572	26.2	2	0	3	0	1	0	0	0	0	0
1573	26.2167	2	0	4	0	0	0	0	0	0	0
1574	26.2333	2	0	4	0	0	0	0	0	0	0
1575	26.25	2	0	4	0	0	0	0	0	0	0
1576	26.2667	2	0	4	0	0	0	0	0	0	0
1577	26.2833	2	0	4	0	0	0	0	0	0	0
1578	26.3	2	0	4	0	0	0	0	0	0	0
1579	26.3167	2	0	4	0	0	0	0	0	0	0
1580	26.3333	2	0	4	0	0	0	0	0	0	0
1581	26.35	2	0	4	0	0	0	0	0	0	0
1582	26.3667	2	0	4	0	0	0	0	0	0	0
1583	26.3833	2	0	4	0	0	0	0	0	0	0
1584	26.4	2	0	4	0	0	0	0	0	0	0
1585	26.4167	2	0	3	0	0	0	0	0	0	0
1586	26.4333	2	0	3	0	0	0	0	0	0	0
1587	26.45	2	0	3	0	0	0	0	0	0	0
1588	26.4667	2	0	3	0	0	0	0	0	0	0
1589	26.4833	2	0	3	0	0	0	0	0	0	0
1590	26.5	2	0	3	0	0	0	0	0	0	0
1591	26.5167	2	0	1	0	0	0	0	0	0	0
1592	26.5333	2	0	2	0	0	0	0	0	0	0
1593	26.55	2	0	2	0	0	0	0	0	0	0
1594	26.5667	2	0	2	0	0	0	0	0	0	0
1595	26.5833	2	0	2	0	0	0	0	0	0	0
1596	26.6	2	0	2	0	0	0	0	0	0	0
1597	26.6167	2	0	2	1	0	0	0	0	0	0
1598	26.6333	2	0	2	1	0	0	0	0	0	0
1599	26.65	2	0	2	1	0	0	0	0	0	0
1600	26.6667	2	0	2	1	0	0	0	0	0	0
1601	26.6833	2	0	2	1	0	0	0	0	0	0
1602	26.7	2	0	2	1	0	0	0	0	0	0
1603	26.7167	2	0	2	1	0	0	0	0	0	0
1604	26.7333	2	0	2	1	0	0	0	0	0	0
1605	26.75	2	0	2	1	0	0	0	0	0	0
1606	26.7667	2	0	2	1	0	0	0	0	0	0
1607	26.7833	2	0	1	1	0	0	0	0	0	0
1608	26.8	2	0	3	1	0	0	0	0	0	0
1609	26.8167	2	0	2	1	0	0	0	0	0	0
1610	26.8333	2	0	2	1	0	0	0	0	0	0
1611	26.85	2	0	2	1	0	0	0	0	0	0
1612	26.8667	2	0	2	1	0	0	0	0	0	0
1613	26.8833	2	0	2	1	0	0	0	0	0	0
1614	26.9	2	0	2	1	0	0	0	0	0	0
1615	26.9167	2	0	2	1	0	0	0	0	0	0
1616	26.9333	2	0	2	1	0	0	0	0	0	0
1617	26.95	2	0	2	1	0	0	0	0	0	0
1618	26.9667	2	0	2	1	0	0	0	0	0	0
1619	26.9833	2	0	2	1	0	0	0	0	0	0
1620	27	2	0	2	1	0	0	0	0	0	0
1621	27.0167	2	0	2	1	0	0	0	0	0	0
1622	27.0333	2	0	3	1	0	0	0	0	0	0
1623	27.05	2	0	3	1	0	0	0	0	0	0
1624	27.0667	2	0	3	1	0	0	0	0	0	0
1625	27.0833	2	0	3	1	0	0	0	0	0	0
1626	27.1	2	0	3	1	0	0	0	0	0	0
1627	27.1167	2	0	3	0	0	0	0	0	0	0
1628	27.1333	2	0	3	0	0	0	0	0	0	0
1629	27.15	2	0	3	0	0	0	0	0	0	0
1630	27.1667	2	0	3	0	0	0	0	0	0	0
1631	27.1833	2	0	3	0	0	0	0	0	0	0
1632	27.2	2	0	2	0	0	0	0	0	0	0
1633	27.2167	2	0	2	0	0	0	0	0	0	0
1634	27.2333	2	0	2	0	0	0	0	0	0	0
1635	27.25	2	0	1	0	0	0	0	0	0	0
1636	27.2667	2	0	1	0	0	0	0	0	0	0
1637	27.2833	2	0	2	0	0	0	0	0	0	0
1638	27.3	2	0	2	0	0	0	0	0	0	0
1639	27.3167	2	0	2	0	0	0	0	0	0	0
1640	27.3333	2	0	2	0	0	0	0	0	0	0
1641	27.35	2	0	2	0	0	0	0	0	0	0
1642	27.3667	2	0	2	0	0	0	0	0	0	0
1643	27.3833	2	0	1	0	0	0	0	0	0	14
1644	27.4	2	0	1	0	0	0	0	0	0	14
1645	27.4167	2	0	3	0	0	0	0	0	0	14
1646	27.4333	2	0	3	0	0	0	0	0	0	14
1647	27.45	2	0	3	0	0	0	0	0	0	14
1648	27.4667	2	0	3	0	0	0	0	0	0	14
1649	27.4833	2	0	3	0	0	0	0	0	0	14
1650	27.5	2	0	1	0	0	0	0	0	0	14
1651	27.5167	2	0	1	0	0	0	0	0	0	14
1652	27.5333	2	0	1	0	0	0	1	0	0	14
1653	27.55	2	0	1	0	0	0	1	0	0	0
1654	27.5667	2	0	1	2	0	0	1	0	0	0
1655	27.5833	2	0	1	2	0	0	1	0	0	0
1656	27.6	2	0	1	2	0	0	1	0	0	0
1657	27.6167	2	0	2	2	0	0	1	0	0	0
1658	27.6333	2	0	2	2	0	0	1	0	0	0
1659	27.65	2	0	2	2	0	0	1	0	0	0
1660	27.6667	2	0	2	2	0	0	1	0	0	0
1661	27.6833	2	0	2	2	0	0	1	0	0	0
1662	27.7	2	0	2	2	0	0	1	0	0	0
1663	27.7167	2	0	2	2	0	0	1	0	0	0
1664	27.7333	2	0	2	2	0	0	1	0	0	0
1665	27.75	2	0	2	2	0	0	1	0	0	0
1666	27.7667	2	0	4	2	0	0	1	0	0	0
1667	27.7833	2	0	3	2	0	0	1	0	0	0
1668	27.8	2	0	3	2	0	0	1	0	0	0
1669	27.8167	2	0	3	2	0	0	1	0	0	0
1670	27.8333	2	0	3	2	0	0	1	0	0	0
1671	27.85	2	0	3	2	0	0	1	0	0	0
1672	27.8667	2	0	3	2	0	0	1	0	0	0
1673	27.8833	2	0	3	2	0	0	1	0	0	0
1674	27.9	2	0	3	2	0	0	1	0	0	0
1675	27.9167	2	0	3	2	0	0	1	0	0	0
1676	27.9333	2	0	3	2	0	0	1	0	0	0
1677	27.95	2	0	3	2	0	0	1	0	0	0
1678	27.9667	2	0	3	2	0	0	1	0	0	0
1679	27.9833	2	0	3	2	0	0	1	0	0	0
1680	28	2	0	2	2	0	0	1	0	0	0
1681	28.0167	2	0	2	2	0	0	1	0	0	0
1682	28.0333	2	0	2	2	0	0	0	0	0	0
1683	28.05	2	0	2	2	0	0	0	0	0	0
1684	28.0667	2	0	2	2	0	0	0	0	0	0
1685	28.0833	2	0	2	2	0	0	0	0	0	0
1686	28.1	2	0	2	2	0	0	0	0	0	0
1687	28.1167	2	0	2	2	0	0	0	0	0	0
1688	28.1333	2	0	2	2	0	0	0	0	0	0
1689	28.15	2	0	2	2	0	0	0	0	0	0
1690	28.1667	2	0	2	2	0	0	0	0	0	0
1691	28.1833	2	0	2	2	0	0	0	0	0	0
1692	28.2	2	0	2	2	0	0	0	0	0	0
1693	28.2167	2	0	2	2	0	0	0	0	0	0
1694	28.2333	2	0	2	2	0	0	0	0	0	0
1695	28.25	2	0	2	2	0	0	0	0	0	0
1696	28.2667	2	0	2	2	0	0	0	0	0	0
1697	28.2833	2	0	2	2	0	0	0	0	0	0
1698	28.3	2	0	2	2	0	0	0	0	0	0
1699	28.3167	2	0	2	2	0	0	0	0	0	0
1700	28.3333	2	0	3	2	0	0	0	0	0	0
1701	28.35	2	0	3	2	0	0	0	0	0	0
1702	28.3667	2	0	3	2	0	0	0	0	0	0
1703	28.3833	2	0	3	2	0	0	0	0	0	0
1704	28.4	2	0	3	2	0	0	0	0	0	0
1705	28.4167	2	0	2	2	0	0	0	0	0	0
1706	28.4333	2	0	2	2	0	0	0	0	0	0
1707	28.45	2	0	2	2	0	0	0	0	0	0
1708	28.4667	2	0	2	2	0	0	0	0	0	0
1709	28.4833	2	0	3	2	0	0	0	0	0	0
1710	28.5	2	0	3	2	0	0	0	0	0	0
1711	28.5167	2	0	1	2	0	0	0	0	0	0
1712	28.5333	2	0	1	2	0	0	0	0	0	0
1713	28.55	2	0	0	2	0	0	0	0	0	0
1714	28.5667	2	0	0	1	0	0	0	0	0	0
1715	28.5833	2	0	0	1	0	0	0	0	0	0
1716	28.6	2	0	0	1	0	0	0	0	0	0
1717	28.6167	2	0	0	1	0	0	0	0	0	0
1718	28.6333	2	0	0	1	0	0	0	0	0	0
1719	28.65	2	0	0	1	0	0	0	0	0	0
1720	28.6667	2	0	0	1	0	0	0	0	0	0
1721	28.6833	2	0	0	1	0	0	0	0	0	0
1722	28.7	2	0	0	1	0	0	0	0	0	0
1723	28.7167	2	0	0	1	0	0	0	0	0	0
1724	28.7333	2	0	0	1	0	0	0	0	0	0
1725	28.75	2	0	0	1	0	0	0	0	0	0
1726	28.7667	2	0	0	1	0	0	0	0	0	0
1727	28.7833	2	0	0	1	0	0	0	0	0	0
1728	28.8	2	0	0	1	0	0	0	0	0	0
1729	28.8167	2	0	0	1	0	0	0	0	0	0
1730	28.8333	2	0	1	1	0	0	0	0	0	0
1731	28.85	2	0	1	1	0	0	0	0	0	0
1732	28.8667	2	0	1	1	0	0	0	0	0	0
1733	28.8833	2	0	1	1	0	0	0	0	0	0
1734	28.9	2	0	1	0	0	0	0	0	0	0
1735	28.9167	2	0	1	0	0	0	0	0	0	0
1736	28.9333	2	0	1	0	0	0	0	0	0	0
1737	28.95	2	0	1	0	0	0	0	0	0	0
1738	28.9667	2	0	1	0	0	0	0	0	0	0
1739	28.9833	2	0	1	0	0	0	0	0	0	0
1740	29	2	0	1	0	0	0	0	0	0	0
1741	29.0167	2	0	2	0	0	0	0	0	0	0
1742	29.0333	2	0	2	0	0	0	0	0	0	0
1743	29.05	2	0	2	0	0	0	0	0	0	0
1744	29.0667	2	0	2	0	0	0	0	0	0	0
1745	29.0833	2	0	1	0	0	0	0	0	0	0
1746	29.1	2	0	1	0	0	0	0	0	0	0
1747	29.1167	2	0	1	0	0	0	0	0	0	0
1748	29.1333	2	0	1	0	0	0	0	0	0	0
1749	29.15	2	0	1	0	0	0	0	0	0	0
1750	29.1667	2	0	2	0	0	0	0	0	0	0
1751	29.1833	2	0	2	0	0	0	0	0	0	0
1752	29.2	2	0	2	0	0	0	0	0	0	0
1753	29.2167	2	0	2	0	0	0	0	0	0	0
1754	29.2333	2	0	2	0	0	0	0	0	0	0
1755	29.25	2	0	2	0	0	0	0	0	0	0
1756	29.2667	2	0	2	0	0	0	0	0	0	0
1757	29.2833	2	0	2	0	0	0	0	0	0	0
1758	29.3	2	0	2	0	0	0	0	0	0	0
1759	29.3167	2	0	2	0	0	0	0	0	0	0
1760	29.3333	2	0	2	1	0	0	0	0	0	0
1761	29.35	2	0	1	1	0	0	0	0	0	0
1762	29.3667	2	0	1	1	0	0	0	0	0	0
1763	29.3833	2	0	1	1	0	0	0	0	0	0
1764	29.4	2	0	1	1	0	0	0	0	0	0
1765	29.4167	2	0	1	1	0	0	0	0	0	0
1766	29.4333	2	0	1	2	0	0	1	0	0	0
1767	29.45	2	0	1	2	0	0	1	0	0	0
1768	29.4667	2	0	1	2	0	0	1	0	0	0
1769	29.4833	2	0	1	2	0	0	1	0	0	0
1770	29.5	2	0	1	2	0	0	1	0	0	0
1771	29.5167	2	0	1	2	0	0	1	0	0	0
1772	29.5333	2	0	1	3	0	0	1	0	0	0
1773	29.55	2	0	1	3	0	0	1	0	0	0
1774	29.5667	2	0	1	3	0	0	1	0	0	0
1775	29.5833	2	0	1	3	0	0	1	0	0	0
1776	29.6	2	0	1	3	0	0	1	0	0	0
1777	29.6167	2	0	1	3	0	0	1	0	0	0
1778	29.6333	2	0	1	3	0	0	1	0	0	0
1779	29.65	2	0	1	3	0	0	1	0	0	0
1780	29.6667	2	0	1	3	0	0	1	0	0	0
1781	29.6833	2	0	1	3	0	0	1	0	0	0
1782	29.7	2	0	1	3	0	0	1	0	0	0
1783	29.7167	2	0	1	3	0	0	1	0	0	0
1784	29.7333	2	0	1	3	0	0	1	0	0	0
1785	29.75	2	0	1	3	0	0	1	0	0	0
1786	29.7667	2	0	1	3	0	0	1	0	0	0
1787	29.7833	2	0	1	3	0	0	1	0	0	0
1788	29.8	2	0	1	3	0	0	1	0	0	0
1789	29.8167	2	0	1	3	0	0	1	0	0	0
1790	29.8333	2	0	1	3	0	0	1	0	0	0
1791	29.85	2	0	1	3	0	0	1	0	0	0
1792	29.8667	2	0	0	3	0	0	1	0	0	0
1793	29.8833	2	0	0	3	0	0	1	0	0	0
1794	29.9	2	0	0	3	0	0	1	0	0	0
1795	29.9167	2	0	0	3	0	0	1	0	0	0
1796	29.9333	2	0	0	4	0	0	1	0	0	0
1797	29.95	2	0	0	4	0	0	1	0	0	0
1798	29.9667	2	0	0	4	0	0	1	0	0	0
1799	29.9833	2	0	1	4	1	0	1	0	0	0
1800	30	2	0	1	4	1	0	1	0	0	0
1801	30.0167	2	0	1	4	1	0	1	0	0	0
1802	30.0333	2	0	1	4	1	0	1	0	0	0
1803	30.05	2	0	1	4	0	0	1	0	0	0
1804	30.0667	2	0	1	4	0	0	1	0	0	0
1805	30.0833	2	0	2	4	0	0	1	0	0	0
1806	30.1	2	0	2	4	0	0	1	0	0	0
1807	30.1167	2	0	2	4	0	0	1	0	0	0
1808	30.1333	2	0	2	4	0	0	1	0	0	0
1809	30.15	2	0	2	4	0	0	1	0	0	0
1810	30.1667	2	0	1	4	0	0	1	0	0	0
1811	30.1833	2	0	1	4	0	0	1	0	0	0
1812	30.2	2	0	1	4	0	0	1	0	0	0
1813	30.2167	2	0	1	4	0	0	1	0	0	0
1814	30.2333	2	0	1	4	0	0	1	0	0	0
1815	30.25	2	0	1	4	0	0	1	0	0	0
1816	30.2667	2	0	1	4	0	0	1	0	0	0
1817	30.2833	2	0	1	4	0	0	1	0	0	0
1818	30.3	2	0	1	4	0	0	1	0	0	0
1819	30.3167	2	0	1	4	0	0	1	0	0	0
1820	30.3333	2	0	1	3	0	0	1	0	0	0
1821	30.35	2	0	1	3	0	0	1	0	0	0
1822	30.3667	2	0	1	3	0	0	1	0	0	0
1823	30.3833	2	0	1	3	0	0	1	0	0	0
1824	30.4	2	0	1	3	0	0	1	0	0	0
1825	30.4167	2	0	1	2	0	0	1	0	0	0
1826	30.4333	2	0	1	2	0	0	1	0	0	0
1827	30.45	2	0	1	2	0	0	1	0	0	0
1828	30.4667	2	0	1	2	0	0	1	0	0	0
1829	30.4833	2	0	1	2	0	0	1	0	0	0
1830	30.5	2	0	1	2	0	0	1	0	0	0
1831	30.5167	2	0	1	2	0	0	1	0	0	0
1832	30.5333	2	0	1	2	0	0	1	0	0	0
1833	30.55	2	0	1	2	0	0	1	0	0	0
1834	30.5667	2	0	1	2	0	0	1	0	0	0
1835	30.5833	2	0	1	2	0	0	1	0	0	0
1836	30.6	2	0	1	2	0	0	1	0	0	0
1837	30.6167	2	0	1	2	0	0	1	0	0	0
1838	30.6333	2	0	1	2	0	0	1	0	0	0
1839	30.65	2	0	1	2	0	0	1	0	0	0
1840	30.6667	2	0	1	2	0	0	1	0	0	0
1841	30.6833	2	0	1	2	0	0	1	0	0	0
1842	30.7	2	0	1	2	0	0	1	0	0	0
1843	30.7167	2	0	1	2	0	0	1	0	0	0
1844	30.7333	2	0	1	2	0	0	1	0	0	0
1845	30.75	2	0	0	2	0	0	1	0	0	0
1846	30.7667	2	0	0	2	0	0	1	0	0	0
1847	30.7833	2	0	0	1	0	0	1	0	0	0
1848	30.8	2	0	0	1	0	0	1	0	0	0
1849	30.8167	2	0	0	1	0	0	1	0	0	0
1850	30.8333	2	0	0	1	0	0	1	0	0	0
1851	30.85	2	0	0	1	0	0	0	0	0	0
1852	30.8667	2	0	0	1	0	0	0	0	0	0
1853	30.8833	2	0	0	1	0	0	0	0	0	0
1854	30.9	2	0	0	1	0	0	0	0	0	0
1855	30.9167	2	0	0	1	0	0	0	0	0	0
1856	30.9333	2	0	0	1	0	0	0	0	0	0
1857	30.95	2	0	0	1	0	0	0	0	0	0
1858	30.9667	2	0	2	1	0	0	0	0	0	0
1859	30.9833	2	0	2	1	0	0	0	0	0	0
1860	31	2	0	2	1	0	0	0	0	0	0
1861	31.0167	2	0	2	1	0	0	0	0	0	0
1862	31.0333	2	0	2	1	0	0	0	0	0	0
1863	31.05	2	0	2	1	0	0	0	0	0	0
1864	31.0667	2	0	2	1	0	0	0	0	0	0
1865	31.0833	2	0	2	1	0	0	0	0	0	0
1866	31.1	2	0	2	1	0	0	0	0	0	0
1867	31.1167	2	0	2	1	0	0	0	0	0	0
1868	31.1333	2	0	2	1	0	0	0	0	0	0
1869	31.15	2	0	2	1	0	0	0	0	0	0
1870	31.1667	2	0	2	1	0	0	0	0	0	0
1871	31.1833	2	0	2	1	0	0	0	0	0	0
1872	31.2	2	0	2	1	0	0	0	0	0	0
1873	31.2167	2	0	2	1	0	0	0	0	0	0
1874	31.2333	2	0	1	1	0	0	0	0	0	0
1875	31.25	2	0	1	1	0	0	0	0	0	0
1876	31.2667	2	0	1	1	0	0	0	0	0	0
1877	31.2833	2	0	1	1	0	0	0	0	0	0
1878	31.3	2	0	1	1	0	0	0	0	0	0
1879	31.3167	2	0	0	1	0	0	0	0	0	0
1880	31.3333	2	0	0	1	1	0	0	0	0	0
1881	31.35	2	0	0	1	1	0	0	0	0	0
1882	31.3667	2	0	0	1	1	0	0	0	0	0
1883	31.3833	2	0	2	1	1	0	0	0	0	0
1884	31.4	2	0	2	1	0	0	0	0	0	0
1885	31.4167	2	0	2	1	0	0	0	0	0	0
1886	31.4333	2	0	2	1	0	0	0	0	0	0
1887	31.45	2	0	2	1	0	0	0	0	0	0
1888	31.4667	2	0	2	1	0	0	0	0	0	0
1889	31.4833	2	0	2	1	0	0	0	0	0	0
1890	31.5	2	0	2	1	0	0	0	0	0	0
1891	31.5167	2	0	2	1	0	0	0	0	0	0
1892	31.5333	2	0	2	1	0	0	0	0	0	0
1893	31.55	2	0	2	1	0	0	0	0	0	0
1894	31.5667	2	0	2	1	0	0	0	0	0	0
1895	31.5833	2	0	2	1	0	0	0	0	0	0
1896	31.6	2	0	2	1	0	0	0	0	0	0
1897	31.6167	2	0	2	1	0	0	0	0	0	0
1898	31.6333	2	0	2	1	0	0	0	0	0	0
1899	31.65	2	0	2	1	0	0	0	0	0	0
1900	31.6667	2	0	2	1	0	0	0	0	0	0
1901	31.6833	2	0	3	1	0	0	0	0	0	0
1902	31.7	2	0	3	1	0	0	0	0	0	0
1903	31.7167	2	0	1	1	0	0	0	0	0	0
1904	31.7333	2	0	1	1	0	0	0	0	0	0
1905	31.75	2	0	1	1	0	0	0	0	0	0
1906	31.7667	2	0	1	1	0	0	0	0	0	0
1907	31.7833	2	0	1	1	0	0	0	0	0	0
1908	31.8	2	0	1	1	0	0	0	0	0	0
1909	31.8167	2	0	1	1	0	0	0	0	0	0
1910	31.8333	2	0	1	1	0	0	0	0	0	0
1911	31.85	2	0	1	1	0	0	0	0	0	0
1912	31.8667	2	0	1	1	0	0	0	0	0	0
1913	31.8833	2	0	1	1	0	0	0	0	0	0
1914	31.9	2	0	1	1	0	0	0	0	0	0
1915	31.9167	2	0	1	1	0	0	0	0	0	0
1916	31.9333	2	0	1	1	0	0	0	0	0	0
1917	31.95	2	0	1	1	0	0	0	0	0	0
1918	31.9667	2	0	1	1	0	0	0	0	0	0
1919	31.9833	2	0	1	1	0	0	0	0	0	0
1920	32	2	0	1	1	0	0	0	0	0	0
1921	32.0167	2	0	0	0	0	0	0	0	0	0
1922	32.0333	2	0	0	0	0	0	0	0	0	0
1923	32.05	2	0	0	0	0	0	0	0	0	0
1924	32.0667	2	0	0	0	0	0	0	0	0	0
1925	32.0833	2	0	0	0	0	0	0	0	0	0
1926	32.1	2	0	0	0	0	0	0	0	0	0
1927	32.1167	2	0	0	0	0	0	0	0	0	0
1928	32.1333	2	0	0	0	0	0	0	0	0	0
1929	32.15	2	0	0	0	0	0	0	0	0	0
1930	32.1667	2	0	0	0	0	0	0	0	0	0
1931	32.1833	2	0	0	0	0	0	0	0	0	0
1932	32.2	2	0	0	0	0	0	0	0	0	0
1933	32.2167	2	0	0	0	0	0	0	0	0	0
1934	32.2333	2	0	0	0	0	0	0	0	0	0
1935	32.25	2	0	0	0	0	0	0	0	0	0
1936	32.2667	2	0	0	0	0	0	0	0	0	0
1937	32.2833	2	0	1	0	0	0	0	0	0	0
1938	32.3	2	0	1	0	0	0	0	0	0	0
1939	32.3167	2	0	1	0	0	0	0	0	0	0
1940	32.3333	2	0	1	0	0	0	0	0	0	0
1941	32.35	2	0	1	0	0	0	0	0	0	0
1942	32.3667	2	0	1	0	0	0	0	0	0	0
1943	32.3833	2	0	1	0	0	0	0	0	0	0
1944	32.4	2	0	1	0	0	0	0	0	0	0
1945	32.4167	2	0	1	0	0	0	0	0	0	0
1946	32.4333	2	0	1	0	0	0	0	0	0	0
1947	32.45	2	0	1	0	0	0	0	0	0	0
1948	32.4667	2	0	1	0	0	0	0	0	0	0
1949	32.4833	2	0	1	0	0	0	0	0	0	0
1950	32.5	2	0	1	0	0	0	0	0	0	0
1951	32.5167	2	0	1	0	0	0	0	0	0	0
1952	32.5333	2	0	1	0	0	0	0	0	0	0
1953	32.55	2	0	1	0	0	0	0	0	0	0
1954	32.5667	2	0	1	0	0	0	0	0	0	0
1955	32.5833	2	0	1	0	0	0	0	0	0	0
1956	32.6	2	0	1	0	0	0	0	0	0	0
1957	32.6167	2	0	1	0	0	0	0	0	0	0
1958	32.6333	2	0	1	0	0	0	0	0	0	0
1959	32.65	2	0	1	0	0	0	0	0	0	0
1960	32.6667	2	0	1	0	0	0	0	0	0	0
1961	32.6833	2	0	1	0	0	0	1	0	0	0
1962	32.7	2	0	1	0	0	0	1	0	0	0
1963	32.7167	2	0	1	0	0	0	1	0	0	0
1964	32.7333	2	0	1	0	0	1	1	0	0	0
1965	32.75	2	0	1	0	0	1	1	0	0	0
1966	32.7667	2	0	1	0	0	1	0	0	0	0
1967	32.7833	2	0	1	0	0	0	0	0	0	0
1968	32.8	2	0	1	0	0	0	0	0	0	0
1969	32.8167	2	0	1	0	0	0	0	0	0	0
1970	32.8333	2	0	1	0	0	0	0	0	0	0
1971	32.85	2	0	1	0	0	0	0	0	0	0
1972	32.8667	2	0	1	0	0	0	0	0	0	0
1973	32.8833	2	0	1	0	0	0	0	0	0	0
1974	32.9	2	0	1	0	0	0	0	0	0	0
1975	32.9167	2	0	1	0	0	0	0	0	0	0
1976	32.9333	2	0	1	0	0	0	0	0	0	0
1977	32.95	2	0	1	0	0	0	0	0	0	0
1978	32.9667	2	0	1	0	0	0	0	0	0	0
1979	32.9833	2	0	1	0	0	0	0	0	0	0
1980	33	2	0	1	0	0	0	0	0	0	0
1981	33.0167	2	0	3	0	0	0	0	0	0	0
1982	33.0333	2	0	3	0	0	0	0	0	0	0
1983	33.05	2	0	3	0	0	0	0	0	0	0
1984	33.0667	2	0	3	0	0	0	0	0	0	0
1985	33.0833	2	0	1	0	0	0	0	0	0	0
1986	33.1	2	0	1	0	0	0	0	0	0	0
1987	33.1167	2	0	1	0	0	0	0	0	0	0
1988	33.1333	2	0	1	0	0	0	0	0	0	0
1989	33.15	2	0	1	0	0	0	0	0	0	0
1990	33.1667	2	0	1	0	0	0	0	0	0	0
1991	33.1833	2	0	1	0	0	0	0	0	0	0
1992	33.2	2	0	1	0	0	0	0	0	0	0
1993	33.2167	2	0	1	0	0	0	0	0	0	0
1994	33.2333	2	0	3	0	0	0	0	0	0	0
1995	33.25	2	0	2	0	0	0	0	0	0	0
1996	33.2667	2	0	2	0	0	0	0	0	0	0
1997	33.2833	2	0	2	0	0	0	0	0	0	0
1998	33.3	2	0	2	0	0	0	0	0	0	0
1999	33.3167	2	0	0	0	0	0	0	0	0	0
[truncated: 1,601 more rows]

## Sheet: GP07_3
Seconds	Minutes	Acanthopagrus australis	Rhabdosargus sarba	Omobranchus anolius	Ambassis	Girella tricuspidata	Tylosurus gavialoides	Sillago ciliata
0	0	0	0	0	0	0	0	0
1	0.0166667	0	0	0	0	0	0	0
2	0.0333333	0	0	0	0	0	0	0
3	0.05	0	0	0	0	0	0	0
4	0.0666667	0	0	0	0	0	0	0
5	0.0833333	0	0	0	0	0	0	0
6	0.1	0	0	0	0	0	0	0
7	0.116667	0	0	0	0	0	0	0
8	0.133333	0	0	0	0	0	0	0
9	0.15	0	0	0	0	0	0	0
10	0.166667	0	0	0	0	0	0	0
11	0.183333	0	1	0	0	0	0	0
12	0.2	0	1	0	0	0	0	0
13	0.216667	0	1	0	0	0	0	0
14	0.233333	0	1	0	0	0	0	0
15	0.25	0	0	0	0	0	0	0
16	0.266667	0	0	0	0	0	0	0
17	0.283333	0	1	1	0	0	0	0
18	0.3	2	1	1	0	0	0	0
19	0.316667	2	1	1	0	0	0	0
20	0.333333	2	0	1	0	0	0	0
21	0.35	2	0	1	0	0	0	0
22	0.366667	2	0	1	0	0	0	0
23	0.383333	2	0	1	0	0	0	0
24	0.4	2	0	1	0	0	0	0
25	0.416667	2	0	1	0	0	0	0
26	0.433333	2	0	1	0	0	0	0
27	0.45	2	0	1	0	0	0	0
28	0.466667	2	0	1	0	0	0	0
29	0.483333	2	0	1	0	0	0	0
30	0.5	0	0	1	0	0	0	0
31	0.516667	0	1	1	0	0	0	0
32	0.533333	0	1	1	0	0	0	0
33	0.55	0	1	1	0	0	0	0
34	0.566667	0	1	1	0	0	0	0
35	0.583333	0	1	1	0	0	0	0
36	0.6	0	1	1	0	0	0	0
37	0.616667	0	1	1	0	0	0	0
38	0.633333	0	1	1	0	0	0	0
39	0.65	0	1	1	0	0	0	0
40	0.666667	0	1	1	0	0	0	0
41	0.683333	0	1	1	0	0	0	0
42	0.7	0	1	1	0	0	0	0
43	0.716667	0	1	1	0	0	0	0
44	0.733333	0	1	1	0	0	0	0
45	0.75	0	1	1	0	0	0	0
46	0.766667	0	1	1	0	0	0	0
47	0.783333	1	0	1	0	0	0	0
48	0.8	1	0	1	0	0	0	0
49	0.816667	1	0	1	0	0	0	0
50	0.833333	1	0	0	0	0	0	0
51	0.85	1	0	0	0	0	0	0
52	0.866667	1	0	0	0	0	0	0
53	0.883333	1	0	0	0	0	0	0
54	0.9	1	0	0	0	0	0	0
55	0.916667	0	0	0	0	0	0	0
56	0.933333	0	0	0	0	0	0	0
57	0.95	0	2	0	0	0	0	0
58	0.966667	0	2	0	0	0	0	0
59	0.983333	2	2	0	0	0	0	0
60	1	2	2	0	0	0	0	0
61	1.01667	2	2	0	0	0	0	0
62	1.03333	2	2	0	0	0	0	0
63	1.05	2	2	0	0	0	0	0
64	1.06667	2	2	0	0	0	0	0
65	1.08333	2	2	0	0	0	0	0
66	1.1	2	2	0	0	0	0	0
67	1.11667	2	2	0	0	0	0	0
68	1.13333	2	2	0	0	0	0	0
69	1.15	2	2	0	0	0	0	0
70	1.16667	2	2	0	0	0	0	0
71	1.18333	2	2	0	0	0	0	0
72	1.2	0	0	0	0	0	0	0
73	1.21667	0	0	0	0	0	0	0
74	1.23333	2	0	0	0	0	0	0
75	1.25	2	0	0	0	0	0	0
76	1.26667	2	0	0	0	0	0	0
77	1.28333	2	0	0	0	0	0	0
78	1.3	2	0	0	0	0	0	0
79	1.31667	2	0	0	0	0	0	0
80	1.33333	2	0	0	0	0	0	0
81	1.35	2	0	0	0	0	0	0
82	1.36667	2	0	0	0	0	0	0
83	1.38333	2	0	0	0	0	0	0
84	1.4	2	0	0	0	0	0	0
85	1.41667	2	0	0	0	0	0	0
86	1.43333	2	0	0	0	0	0	0
87	1.45	2	0	0	0	0	0	0
88	1.46667	2	0	0	0	0	0	0
89	1.48333	2	0	0	0	0	0	0
90	1.5	2	0	0	0	0	0	0
91	1.51667	2	0	0	0	0	0	0
92	1.53333	2	0	1	0	0	0	0
93	1.55	2	0	1	0	0	0	0
94	1.56667	2	0	1	0	0	0	0
95	1.58333	2	0	1	0	0	0	0
96	1.6	2	0	1	0	0	0	0
97	1.61667	2	0	1	0	0	0	0
98	1.63333	2	0	1	0	0	0	0
99	1.65	2	0	1	0	0	0	0
100	1.66667	2	0	1	0	0	0	0
101	1.68333	1	0	1	0	0	0	0
102	1.7	1	0	1	0	0	0	0
103	1.71667	1	0	1	0	0	0	0
104	1.73333	1	0	1	0	0	0	0
105	1.75	1	0	1	0	0	0	0
106	1.76667	1	0	1	0	0	0	0
107	1.78333	1	0	1	0	0	0	0
108	1.8	1	0	1	0	0	0	0
109	1.81667	1	0	1	0	0	0	0
110	1.83333	1	0	1	0	0	0	0
111	1.85	1	0	1	0	0	0	0
112	1.86667	1	0	1	0	0	0	0
113	1.88333	1	0	1	0	0	0	0
114	1.9	3	0	1	0	0	0	0
115	1.91667	3	0	1	0	0	0	0
116	1.93333	3	0	1	0	0	0	0
117	1.95	3	0	1	0	0	0	0
118	1.96667	3	0	1	0	0	0	0
119	1.98333	3	0	1	0	0	0	0
120	2	3	0	0	0	0	0	0
121	2.01667	3	0	0	0	0	0	0
122	2.03333	3	0	0	0	0	0	0
123	2.05	3	0	0	0	0	0	0
124	2.06667	3	0	0	0	0	0	0
125	2.08333	3	0	0	0	0	0	0
126	2.1	3	0	0	0	0	0	0
127	2.11667	1	0	0	0	0	0	0
128	2.13333	1	0	0	0	0	0	0
129	2.15	1	0	0	0	0	0	0
130	2.16667	1	0	0	0	0	0	0
131	2.18333	1	0	0	109	0	0	0
132	2.2	1	0	0	109	0	0	0
133	2.21667	1	0	0	109	0	0	0
134	2.23333	1	0	0	109	0	0	0
135	2.25	1	0	0	109	0	0	0
136	2.26667	1	0	0	109	0	0	0
137	2.28333	1	0	0	109	0	0	0
138	2.3	1	0	0	109	0	0	0
139	2.31667	1	0	0	109	0	0	0
140	2.33333	0	0	0	109	0	0	0
141	2.35	0	0	0	109	0	0	0
142	2.36667	0	0	0	109	0	0	0
143	2.38333	0	0	0	150	0	0	0
144	2.4	0	0	0	150	0	0	0
145	2.41667	0	0	0	150	0	0	0
146	2.43333	0	0	0	150	0	0	0
147	2.45	0	0	0	150	0	0	0
148	2.46667	0	0	0	150	0	0	0
149	2.48333	1	0	0	150	0	0	0
150	2.5	1	0	0	150	0	0	0
151	2.51667	1	0	0	150	0	0	0
152	2.53333	1	0	0	150	0	0	0
153	2.55	1	0	0	150	0	0	0
154	2.56667	0	0	0	150	0	0	0
155	2.58333	1	0	0	140	0	0	0
156	2.6	1	0	0	140	0	0	0
157	2.61667	1	0	0	140	0	0	0
158	2.63333	1	0	0	140	0	0	0
159	2.65	1	0	0	140	0	0	0
160	2.66667	1	0	0	140	0	0	0
161	2.68333	1	0	0	140	0	0	0
162	2.7	1	0	0	140	0	0	0
163	2.71667	1	0	0	140	0	0	0
164	2.73333	1	0	0	140	0	0	0
165	2.75	1	0	0	140	0	0	0
166	2.76667	1	0	0	72	0	0	0
167	2.78333	1	0	0	72	0	0	0
168	2.8	1	0	0	72	0	0	0
169	2.81667	2	1	0	72	0	0	0
170	2.83333	2	1	0	72	0	0	0
171	2.85	2	1	0	72	0	0	0
172	2.86667	2	1	0	72	0	0	0
173	2.88333	2	1	0	72	0	0	0
174	2.9	1	1	0	72	0	0	0
175	2.91667	0	1	0	72	0	0	0
176	2.93333	0	1	0	72	0	0	0
177	2.95	0	1	0	20	0	0	0
178	2.96667	0	1	0	20	0	0	0
179	2.98333	0	1	0	20	0	0	0
180	3	0	0	0	20	0	0	0
181	3.01667	0	0	0	20	0	0	0
182	3.03333	0	0	0	20	0	0	0
183	3.05	0	0	0	20	0	0	0
184	3.06667	0	0	0	20	0	0	0
185	3.08333	0	0	0	20	0	0	0
186	3.1	0	0	0	20	0	0	0
187	3.11667	0	0	0	20	0	0	0
188	3.13333	0	0	0	0	0	0	0
189	3.15	0	0	0	0	0	0	0
190	3.16667	0	0	0	0	0	0	0
191	3.18333	0	0	0	0	0	0	0
192	3.2	0	0	0	0	0	0	0
193	3.21667	0	0	0	0	0	0	0
194	3.23333	0	0	0	0	0	0	0
195	3.25	0	0	0	0	0	0	0
196	3.26667	0	0	0	0	0	0	0
197	3.28333	0	0	0	0	0	0	0
198	3.3	0	0	0	0	0	0	0
199	3.31667	0	0	0	0	0	0	0
200	3.33333	0	0	0	0	0	0	0
201	3.35	0	0	0	0	0	0	0
202	3.36667	0	0	0	0	0	0	0
203	3.38333	0	0	0	0	0	0	0
204	3.4	0	0	0	0	0	0	0
205	3.41667	0	0	0	0	0	0	0
206	3.43333	0	0	0	0	0	0	0
207	3.45	0	0	0	0	0	0	0
208	3.46667	0	0	0	0	0	0	0
209	3.48333	0	1	0	0	0	0	0
210	3.5	0	1	0	0	0	0	0
211	3.51667	0	1	0	0	0	0	0
212	3.53333	2	1	0	0	0	0	0
213	3.55	2	1	0	0	0	0	0
214	3.56667	2	1	0	0	0	0	0
215	3.58333	2	1	0	0	0	0	0
216	3.6	2	1	0	0	0	0	0
217	3.61667	2	1	0	0	0	0	0
218	3.63333	2	1	0	0	1	0	0
219	3.65	2	1	0	0	1	0	0
220	3.66667	2	1	0	0	1	0	0
221	3.68333	2	1	0	0	1	0	0
222	3.7	2	1	0	0	1	0	0
223	3.71667	2	1	0	0	1	0	0
224	3.73333	2	0	0	0	1	0	0
225	3.75	2	0	0	0	1	0	0
226	3.76667	2	0	0	0	1	1	0
227	3.78333	2	0	0	0	1	1	0
228	3.8	2	0	0	0	0	1	0
229	3.81667	2	1	0	0	0	0	0
230	3.83333	2	1	0	0	0	0	0
231	3.85	2	1	0	0	0	0	0
232	3.86667	2	1	0	0	0	0	0
233	3.88333	0	1	1	0	0	0	0
234	3.9	0	1	1	0	0	0	0
235	3.91667	0	1	1	0	0	0	0
236	3.93333	0	0	1	0	0	0	0
237	3.95	0	0	1	0	0	0	0
238	3.96667	0	0	1	0	0	0	0
239	3.98333	0	0	1	0	0	0	0
240	4	0	0	1	0	0	0	0
241	4.01667	0	0	1	0	0	0	0
242	4.03333	0	0	1	0	0	0	0
243	4.05	0	0	1	0	0	0	0
244	4.06667	0	0	1	0	0	0	0
245	4.08333	0	0	1	0	0	0	0
246	4.1	0	0	1	0	0	0	0
247	4.11667	0	0	1	0	0	0	0
248	4.13333	0	0	1	0	0	0	0
249	4.15	0	0	1	0	0	0	0
250	4.16667	0	0	1	0	0	0	0
251	4.18333	0	0	1	0	0	0	0
252	4.2	0	0	1	0	0	0	0
253	4.21667	0	0	1	0	0	0	0
254	4.23333	0	0	1	0	0	0	0
255	4.25	0	0	1	0	0	0	0
256	4.26667	0	0	0	21	0	0	0
257	4.28333	1	0	0	21	0	0	0
258	4.3	1	0	0	21	0	0	0
259	4.31667	1	0	0	21	0	0	0
260	4.33333	1	0	0	21	0	0	0
261	4.35	1	0	0	21	0	0	0
262	4.36667	1	0	0	21	0	0	0
263	4.38333	1	0	0	21	0	0	0
264	4.4	1	0	0	21	0	0	0
265	4.41667	1	0	0	21	0	0	0
266	4.43333	1	0	0	21	0	0	0
267	4.45	1	0	0	21	0	0	0
268	4.46667	1	0	0	21	0	0	0
269	4.48333	1	0	0	21	0	0	0
270	4.5	1	0	0	21	0	0	0
271	4.51667	1	0	0	0	0	0	0
272	4.53333	1	0	0	0	0	0	0
273	4.55	1	0	0	0	0	0	0
274	4.56667	1	0	0	0	0	0	0
275	4.58333	1	0	0	0	0	0	0
276	4.6	1	0	0	0	0	0	0
277	4.61667	1	0	0	0	0	0	0
278	4.63333	1	0	0	0	0	0	0
279	4.65	1	0	0	0	0	0	0
280	4.66667	1	0	0	0	0	0	0
281	4.68333	1	0	0	0	0	0	0
282	4.7	0	0	0	0	0	0	0
283	4.71667	1	0	0	0	0	0	0
284	4.73333	1	0	0	0	0	0	0
285	4.75	1	0	0	0	0	0	0
286	4.76667	1	0	0	0	0	0	0
287	4.78333	0	0	0	0	0	0	0
288	4.8	0	0	0	0	0	0	0
289	4.81667	0	0	0	0	0	0	0
290	4.83333	0	0	0	0	0	0	0
291	4.85	0	0	0	0	0	0	0
292	4.86667	0	0	0	0	0	0	0
293	4.88333	0	0	0	0	0	0	0
294	4.9	0	0	0	0	0	0	0
295	4.91667	0	0	0	0	0	0	0
296	4.93333	0	0	0	0	0	0	0
297	4.95	0	0	0	0	0	0	0
298	4.96667	0	0	0	0	0	0	0
299	4.98333	0	0	0	0	0	0	0
300	5	0	0	0	0	0	0	0
301	5.01667	0	0	0	0	0	0	0
302	5.03333	0	0	0	0	0	0	0
303	5.05	0	0	0	0	0	0	0
304	5.06667	0	0	0	0	0	0	0
305	5.08333	0	0	0	0	0	0	0
306	5.1	0	0	0	0	0	0	0
307	5.11667	0	0	0	0	0	0	0
308	5.13333	0	0	0	0	0	0	0
309	5.15	0	0	0	0	0	0	0
310	5.16667	0	0	0	0	0	0	0
311	5.18333	1	0	0	0	0	0	0
312	5.2	1	0	0	0	0	0	0
313	5.21667	1	0	0	0	0	0	0
314	5.23333	1	0	0	0	0	0	0
315	5.25	1	0	0	0	0	0	0
316	5.26667	1	0	0	0	0	0	0
317	5.28333	0	0	0	0	0	0	0
318	5.3	0	0	0	0	0	0	0
319	5.31667	0	0	0	0	0	0	0
320	5.33333	0	0	0	0	0	0	0
321	5.35	0	0	0	0	0	0	0
322	5.36667	0	0	0	0	0	0	0
323	5.38333	0	0	0	0	0	0	0
324	5.4	0	0	0	0	0	0	0
325	5.41667	0	0	0	0	0	0	0
326	5.43333	0	0	0	0	0	0	0
327	5.45	0	0	0	0	0	0	0
328	5.46667	0	0	0	0	0	0	0
329	5.48333	0	0	0	0	0	0	0
330	5.5	0	0	0	0	0	0	0
331	5.51667	0	0	0	0	0	0	0
332	5.53333	0	0	0	0	0	0	0
333	5.55	0	0	0	0	0	0	0
334	5.56667	0	0	0	0	0	0	0
335	5.58333	0	0	0	0	0	0	0
336	5.6	0	0	0	0	0	0	0
337	5.61667	0	0	0	0	0	0	0
338	5.63333	0	0	1	0	0	0	0
339	5.65	0	0	1	0	0	0	0
340	5.66667	0	0	1	0	0	0	0
341	5.68333	0	0	1	0	0	0	0
342	5.7	0	0	1	0	0	0	0
343	5.71667	0	0	1	0	0	0	0
344	5.73333	0	0	1	0	0	0	0
345	5.75	0	0	1	0	0	0	0
346	5.76667	0	0	1	0	0	0	0
347	5.78333	0	0	1	0	0	0	0
348	5.8	0	0	1	0	0	0	0
349	5.81667	0	0	1	0	0	0	0
350	5.83333	0	0	1	0	0	0	0
351	5.85	0	0	1	0	0	0	0
352	5.86667	0	0	1	0	0	0	0
353	5.88333	0	0	1	0	0	0	0
354	5.9	0	0	1	0	0	0	0
355	5.91667	0	0	1	0	0	0	0
356	5.93333	0	0	1	0	0	0	0
357	5.95	0	0	1	0	0	0	0
358	5.96667	0	0	1	0	0	0	0
359	5.98333	0	0	0	0	0	0	0
360	6	0	0	0	0	0	0	0
361	6.01667	0	0	0	0	0	0	0
362	6.03333	0	0	0	0	0	0	0
363	6.05	0	0	0	0	0	0	0
364	6.06667	0	0	0	0	0	0	0
365	6.08333	0	0	0	0	0	0	0
366	6.1	0	0	0	0	0	0	0
367	6.11667	0	0	0	0	0	0	0
368	6.13333	0	1	0	0	0	0	0
369	6.15	0	1	0	0	0	0	0
370	6.16667	0	1	0	0	0	0	0
371	6.18333	0	1	0	0	0	0	0
372	6.2	0	1	0	0	0	0	0
373	6.21667	0	1	0	0	0	0	0
374	6.23333	0	0	0	0	0	0	0
375	6.25	0	0	0	0	0	0	0
376	6.26667	0	0	0	0	0	0	0
377	6.28333	0	0	0	0	0	0	0
378	6.3	0	0	0	0	0	0	0
379	6.31667	0	0	0	0	0	0	0
380	6.33333	0	0	0	0	0	0	0
381	6.35	0	0	0	0	0	0	0
382	6.36667	0	0	0	0	0	0	0
383	6.38333	0	0	0	0	0	0	0
384	6.4	0	0	0	0	0	0	0
385	6.41667	0	0	0	0	0	0	0
386	6.43333	0	0	0	0	0	0	0
387	6.45	0	0	0	0	0	0	0
388	6.46667	0	0	0	0	0	0	0
389	6.48333	0	0	0	0	0	0	0
390	6.5	0	0	0	0	0	0	0
391	6.51667	0	0	0	0	0	0	0
392	6.53333	2	0	0	0	0	1	0
393	6.55	2	0	0	0	0	1	0
394	6.56667	2	0	0	0	0	1	0
395	6.58333	2	0	0	0	0	0	0
396	6.6	2	0	0	0	0	0	0
397	6.61667	2	0	0	0	0	0	0
398	6.63333	2	0	0	0	0	0	0
399	6.65	2	0	0	0	0	0	0
400	6.66667	2	0	0	0	0	0	0
401	6.68333	2	0	0	0	0	0	0
402	6.7	2	0	0	0	0	0	0
403	6.71667	2	0	0	0	0	0	0
404	6.73333	2	0	0	0	0	0	0
405	6.75	2	0	0	0	0	0	0
406	6.76667	2	0	0	0	0	0	0
407	6.78333	0	0	0	0	0	0	0
408	6.8	0	0	0	0	0	0	0
409	6.81667	0	0	0	0	0	0	0
410	6.83333	0	0	0	0	0	0	0
411	6.85	0	0	0	0	0	0	0
412	6.86667	0	0	0	0	0	0	0
413	6.88333	0	0	0	0	0	0	0
414	6.9	0	0	0	0	0	0	0
415	6.91667	0	0	0	0	0	0	0
416	6.93333	0	0	0	0	0	0	0
417	6.95	0	0	0	0	0	0	0
418	6.96667	0	0	0	0	0	0	0
419	6.98333	0	0	0	0	0	0	0
420	7	0	0	0	0	0	0	0
421	7.01667	0	0	0	0	0	0	0
422	7.03333	0	1	0	0	0	0	0
423	7.05	0	1	0	0	0	0	0
424	7.06667	0	1	0	0	0	0	0
425	7.08333	0	1	0	0	0	0	0
426	7.1	0	1	0	0	0	0	0
427	7.11667	1	1	0	0	0	0	0
428	7.13333	1	0	0	0	0	0	0
429	7.15	1	0	0	0	0	0	0
430	7.16667	0	0	0	0	0	0	0
431	7.18333	0	0	0	0	0	0	0
432	7.2	0	0	0	0	0	0	0
433	7.21667	0	0	0	0	0	0	0
434	7.23333	0	0	0	0	0	0	0
435	7.25	0	0	0	0	0	0	0
436	7.26667	0	0	0	0	0	0	0
437	7.28333	0	0	0	0	0	0	0
438	7.3	0	0	0	0	0	0	0
439	7.31667	0	0	0	0	0	0	0
440	7.33333	2	0	0	0	0	0	0
441	7.35	2	0	0	0	0	0	0
442	7.36667	2	0	0	0	0	0	0
443	7.38333	2	0	0	0	0	0	0
444	7.4	2	0	0	0	0	0	0
445	7.41667	2	0	0	0	0	0	0
446	7.43333	2	0	0	0	0	0	0
447	7.45	2	0	0	0	0	0	0
448	7.46667	2	0	0	0	0	0	0
449	7.48333	0	0	0	0	0	0	0
450	7.5	0	0	0	0	0	0	0
451	7.51667	0	0	0	0	0	0	0
452	7.53333	0	0	0	0	0	0	0
453	7.55	0	0	0	0	0	0	0
454	7.56667	0	0	0	0	0	0	0
455	7.58333	1	0	0	0	0	0	0
456	7.6	1	0	0	0	0	0	0
457	7.61667	1	0	0	0	0	0	0
458	7.63333	1	0	0	0	0	0	0
459	7.65	1	0	0	0	0	0	0
460	7.66667	0	0	0	0	0	0	0
461	7.68333	0	0	0	0	0	0	0
462	7.7	0	0	0	0	0	0	0
463	7.71667	0	0	0	0	0	0	0
464	7.73333	0	0	0	0	0	0	0
465	7.75	0	0	0	0	0	0	0
466	7.76667	0	0	0	0	0	0	0
467	7.78333	0	0	0	0	0	0	0
468	7.8	0	0	0	0	0	0	0
469	7.81667	0	0	0	0	0	0	0
470	7.83333	0	0	0	0	0	0	0
471	7.85	0	0	0	0	0	0	0
472	7.86667	0	0	0	0	0	0	0
473	7.88333	0	0	0	0	0	0	0
474	7.9	0	0	0	0	0	0	0
475	7.91667	0	0	0	0	0	0	0
476	7.93333	0	0	0	0	0	0	0
477	7.95	0	0	0	0	0	0	0
478	7.96667	0	0	0	0	0	0	0
479	7.98333	0	0	0	0	0	0	0
480	8	0	0	0	0	0	0	0
481	8.01667	0	0	0	0	0	0	0
482	8.03333	0	0	0	0	0	0	0
483	8.05	0	0	0	0	0	0	0
484	8.06667	0	0	0	0	0	0	0
485	8.08333	0	0	0	0	0	0	0
486	8.1	0	0	0	0	0	0	0
487	8.11667	0	0	0	0	0	0	0
488	8.13333	0	0	0	0	0	0	0
489	8.15	0	0	0	0	0	0	0
490	8.16667	0	0	0	0	0	0	0
491	8.18333	0	0	0	0	0	0	0
492	8.2	0	0	0	0	0	0	0
493	8.21667	0	0	0	0	0	0	0
494	8.23333	0	0	0	0	0	0	0
495	8.25	0	0	0	0	0	0	0
496	8.26667	0	0	0	0	0	0	0
497	8.28333	0	0	0	0	0	0	0
498	8.3	0	0	0	0	0	0	0
499	8.31667	0	0	0	0	0	0	0
500	8.33333	0	0	0	0	0	0	0
501	8.35	0	0	0	0	0	0	0
502	8.36667	0	0	0	0	0	0	0
503	8.38333	0	0	0	0	0	0	0
504	8.4	0	0	0	0	0	0	0
505	8.41667	1	0	0	0	0	0	0
506	8.43333	1	0	1	0	0	0	1
507	8.45	0	0	1	0	0	0	1
508	8.46667	0	0	1	0	0	0	1
509	8.48333	0	0	1	0	0	0	1
510	8.5	0	0	0	0	0	0	0
511	8.51667	0	0	0	0	0	0	0
512	8.53333	0	0	0	0	0	0	0
513	8.55	0	0	0	0	0	0	0
514	8.56667	0	0	0	0	0	0	0
515	8.58333	1	0	0	0	0	0	0
516	8.6	1	0	0	0	0	0	0
517	8.61667	1	0	0	0	0	0	0
518	8.63333	1	0	0	0	0	0	0
519	8.65	0	0	0	0	0	0	0
520	8.66667	0	0	0	0	0	0	0
521	8.68333	0	0	0	0	0	0	0
522	8.7	0	0	0	0	0	0	0
523	8.71667	0	0	0	0	0	0	0
524	8.73333	0	0	0	0	0	0	0
525	8.75	0	0	0	0	0	0	0
526	8.76667	0	0	0	0	0	0	0
527	8.78333	0	0	0	0	0	0	0
528	8.8	0	0	0	0	0	0	0
529	8.81667	0	0	0	0	0	0	0
530	8.83333	1	1	0	0	0	0	0
531	8.85	1	1	0	0	0	0	0
532	8.86667	0	1	0	0	0	0	0
533	8.88333	0	0	0	0	0	0	0
534	8.9	0	0	0	0	0	0	0
535	8.91667	0	0	0	0	0	0	0
536	8.93333	0	0	0	0	0	0	0
537	8.95	0	0	0	0	0	0	0
538	8.96667	0	0	0	0	0	0	0
539	8.98333	0	0	0	0	0	0	0
540	9	0	0	0	0	0	0	0
541	9.01667	0	0	0	0	0	0	0
542	9.03333	0	0	0	0	0	0	0
543	9.05	0	0	0	0	0	0	0
544	9.06667	0	0	0	0	0	0	0
545	9.08333	0	0	0	0	0	0	0
546	9.1	0	0	0	0	0	0	0
547	9.11667	0	0	0	0	0	0	0
548	9.13333	0	0	0	0	0	0	0
549	9.15	0	0	0	0	0	0	0
550	9.16667	0	0	0	0	0	0	0
551	9.18333	0	0	0	0	0	0	0
552	9.2	0	0	0	0	0	0	0
553	9.21667	0	0	0	0	0	0	0
554	9.23333	0	0	0	0	0	0	0
555	9.25	0	0	0	0	0	0	0
556	9.26667	0	0	0	0	0	0	0
557	9.28333	0	0	0	0	0	0	0
558	9.3	0	0	0	0	0	0	0
559	9.31667	0	0	0	0	0	0	0
560	9.33333	0	0	0	0	0	0	0
561	9.35	0	0	0	0	0	0	0
562	9.36667	0	0	0	0	0	0	0
563	9.38333	0	0	0	0	0	0	0
564	9.4	0	0	0	0	0	0	0
565	9.41667	0	0	0	0	0	0	0
566	9.43333	0	0	0	10	0	0	0
567	9.45	0	0	0	10	0	0	0
568	9.46667	0	0	0	10	0	0	0
569	9.48333	0	0	0	10	0	0	0
570	9.5	0	0	0	10	0	0	0
571	9.51667	0	0	2	10	0	0	0
572	9.53333	0	0	4	10	0	0	0
573	9.55	0	0	2	10	0	0	0
574	9.56667	0	0	0	11	0	0	0
575	9.58333	0	0	1	11	0	0	0
576	9.6	0	0	1	11	0	0	0
577	9.61667	0	0	1	11	0	0	0
578	9.63333	0	0	1	11	0	0	0
579	9.65	0	0	0	11	0	0	0
580	9.66667	0	0	0	11	0	0	0
581	9.68333	0	0	0	20	0	0	0
582	9.7	0	0	0	20	0	0	0
583	9.71667	0	0	0	20	0	0	0
584	9.73333	0	0	1	20	0	0	0
585	9.75	0	0	1	20	0	0	0
586	9.76667	0	0	1	20	0	0	0
587	9.78333	0	0	1	20	0	0	0
588	9.8	0	0	1	65	0	0	0
589	9.81667	0	0	1	65	0	0	0
590	9.83333	0	0	1	65	0	0	0
591	9.85	0	0	1	65	0	0	0
592	9.86667	0	0	0	65	0	0	0
593	9.88333	0	0	0	65	0	0	0
594	9.9	0	0	0	65	0	0	0
595	9.91667	0	0	0	25	0	0	0
596	9.93333	0	0	1	25	0	0	0
597	9.95	0	0	1	25	0	0	0
598	9.96667	0	0	0	25	0	0	0
599	9.98333	0	0	0	25	0	0	0
600	10	0	0	0	25	0	0	0
601	10.0167	0	0	0	25	0	0	0
602	10.0333	0	0	0	0	0	0	0
603	10.05	0	0	0	0	0	0	0
604	10.0667	0	0	0	0	0	0	0
605	10.0833	0	0	0	0	0	0	0
606	10.1	0	0	0	0	0	0	0
607	10.1167	0	0	0	0	0	0	0
608	10.1333	0	0	0	0	0	0	0
609	10.15	0	0	0	0	0	0	0
610	10.1667	0	0	0	0	0	0	0
611	10.1833	0	0	0	0	0	0	0
612	10.2	0	0	0	0	0	0	0
613	10.2167	0	0	0	0	0	0	0
614	10.2333	0	0	0	0	0	0	0
615	10.25	0	0	0	0	0	0	0
616	10.2667	0	0	0	0	0	0	0
617	10.2833	0	0	0	0	0	0	0
618	10.3	0	0	0	0	0	0	0
619	10.3167	0	0	0	0	0	0	0
620	10.3333	0	0	0	0	0	0	0
621	10.35	0	0	0	0	0	0	0
622	10.3667	0	0	0	0	0	0	0
623	10.3833	0	0	0	0	0	0	0
624	10.4	0	0	0	0	0	0	0
625	10.4167	0	0	0	0	0	0	0
626	10.4333	0	0	0	0	0	0	0
627	10.45	0	0	0	0	0	0	0
628	10.4667	0	0	0	0	0	0	0
629	10.4833	0	0	0	0	0	0	0
630	10.5	0	0	0	0	0	0	0
631	10.5167	0	0	0	0	0	1	0
632	10.5333	1	0	0	0	0	1	0
633	10.55	1	0	0	0	0	1	0
634	10.5667	0	0	0	0	0	0	0
635	10.5833	0	0	0	0	0	0	0
636	10.6	0	0	0	0	0	0	0
637	10.6167	0	0	0	0	0	0	0
638	10.6333	0	0	0	0	0	0	0
639	10.65	0	0	0	0	0	0	0
640	10.6667	0	0	0	0	0	0	0
641	10.6833	0	0	0	0	0	0	0
642	10.7	0	0	0	0	0	0	0
643	10.7167	0	0	0	0	0	0	0
644	10.7333	0	0	0	0	0	0	0
645	10.75	0	0	0	0	0	0	0
646	10.7667	0	0	0	0	0	0	0
647	10.7833	0	0	0	0	0	0	0
648	10.8	0	0	0	0	0	0	0
649	10.8167	0	0	0	0	0	0	0
650	10.8333	0	0	1	0	0	0	0
651	10.85	0	0	1	0	0	0	0
652	10.8667	0	0	1	0	0	0	0
653	10.8833	0	0	1	0	0	0	0
654	10.9	0	0	1	0	0	0	0
655	10.9167	0	0	0	0	0	0	0
656	10.9333	0	0	0	0	0	0	0
657	10.95	0	0	0	0	0	0	0
658	10.9667	0	0	0	0	0	0	0
659	10.9833	0	0	0	0	0	0	0
660	11	0	0	0	0	0	0	0
661	11.0167	0	0	1	0	0	0	0
662	11.0333	0	0	1	0	0	0	0
663	11.05	0	0	1	0	0	0	0
664	11.0667	0	0	0	0	0	0	0
665	11.0833	0	0	0	0	0	0	0
666	11.1	0	0	0	0	0	0	0
667	11.1167	0	0	0	0	0	0	0
668	11.1333	0	0	0	0	0	0	0
669	11.15	0	0	0	0	0	0	0
670	11.1667	0	0	0	0	0	0	0
671	11.1833	0	0	1	0	0	0	0
672	11.2	0	0	1	0	0	0	0
673	11.2167	0	0	1	0	0	0	0
674	11.2333	0	0	1	0	0	0	0
675	11.25	0	0	1	0	0	0	0
676	11.2667	0	0	0	0	0	0	0
677	11.2833	0	0	0	0	0	0	0
678	11.3	0	0	0	0	0	0	0
679	11.3167	0	0	0	0	0	0	0
680	11.3333	0	0	0	0	0	0	0
681	11.35	0	0	0	0	0	0	0
682	11.3667	0	0	0	0	0	0	0
683	11.3833	1	0	0	0	0	0	0
684	11.4	1	0	0	0	0	0	0
685	11.4167	1	0	0	0	0	0	0
686	11.4333	1	0	0	0	0	0	0
687	11.45	1	0	0	0	0	0	0
688	11.4667	1	0	0	0	0	0	0
689	11.4833	0	0	0	0	0	0	0
690	11.5	0	0	0	0	0	0	0
691	11.5167	0	0	0	0	0	0	0
692	11.5333	0	0	0	0	0	0	0
693	11.55	0	0	0	0	0	0	0
694	11.5667	0	0	0	0	0	0	0
695	11.5833	0	0	0	0	0	0	0
696	11.6	0	0	0	0	0	0	0
697	11.6167	0	0	0	0	0	0	0
698	11.6333	0	0	0	0	0	0	0
699	11.65	0	0	0	0	0	0	0
700	11.6667	0	0	0	0	0	0	0
701	11.6833	0	0	0	0	0	0	0
702	11.7	0	0	0	0	0	0	0
703	11.7167	0	0	0	0	0	0	0
704	11.7333	0	0	0	0	0	0	0
705	11.75	0	0	0	0	0	0	0
706	11.7667	0	0	0	0	0	0	0
707	11.7833	0	0	1	0	0	0	0
708	11.8	0	0	1	0	0	0	0
709	11.8167	0	0	1	0	0	0	0
710	11.8333	0	0	1	0	0	0	0
711	11.85	0	0	1	0	0	0	0
712	11.8667	0	0	1	0	0	0	0
713	11.8833	0	0	1	0	0	0	0
714	11.9	0	0	1	0	0	0	0
715	11.9167	0	0	1	0	0	0	0
716	11.9333	0	0	1	0	0	0	0
717	11.95	0	0	1	0	0	0	0
718	11.9667	0	0	1	0	0	0	0
719	11.9833	0	0	1	0	0	0	0
720	12	0	0	1	0	0	0	0
721	12.0167	0	0	1	0	0	0	0
722	12.0333	0	0	0	0	0	0	0
723	12.05	0	0	0	0	0	0	0
724	12.0667	0	0	0	0	0	0	0
725	12.0833	0	0	0	0	0	1	0
726	12.1	0	0	0	0	0	1	0
727	12.1167	0	0	0	0	0	1	0
728	12.1333	0	0	0	0	0	0	0
729	12.15	0	0	0	0	0	0	0
730	12.1667	0	0	0	0	0	0	0
731	12.1833	0	0	0	0	0	0	0
732	12.2	0	0	0	0	0	0	0
733	12.2167	0	0	0	0	0	0	0
734	12.2333	0	0	0	0	0	0	0
735	12.25	0	0	0	0	0	0	0
736	12.2667	0	0	0	0	0	0	0
737	12.2833	0	0	1	0	0	0	0
738	12.3	0	0	1	0	0	0	0
739	12.3167	0	0	1	0	0	0	0
740	12.3333	0	0	1	0	0	0	0
741	12.35	0	0	1	0	0	0	0
742	12.3667	0	0	1	0	0	0	0
743	12.3833	0	0	1	0	0	0	0
744	12.4	0	0	1	0	0	0	0
745	12.4167	0	0	1	0	0	0	0
746	12.4333	0	0	1	0	0	0	0
747	12.45	0	0	1	0	0	0	0
748	12.4667	0	0	1	0	0	0	0
749	12.4833	0	0	1	0	0	0	0
750	12.5	0	0	1	0	0	0	0
751	12.5167	1	0	1	0	0	0	0
752	12.5333	1	0	1	0	0	0	0
753	12.55	1	0	1	0	0	0	0
754	12.5667	1	0	1	0	0	0	0
755	12.5833	1	0	1	0	0	0	0
756	12.6	0	0	1	0	0	0	0
757	12.6167	0	0	1	0	0	0	0
758	12.6333	0	0	1	0	0	0	0
759	12.65	0	0	1	0	0	0	0
760	12.6667	0	0	1	0	0	0	0
761	12.6833	0	0	1	0	0	0	0
762	12.7	0	0	1	0	0	0	0
763	12.7167	0	0	1	0	0	0	0
764	12.7333	0	0	1	0	0	0	0
765	12.75	0	0	1	0	0	0	0
766	12.7667	0	0	1	0	0	0	0
767	12.7833	0	0	1	0	0	0	0
768	12.8	0	0	1	0	0	0	0
769	12.8167	0	0	1	0	0	0	0
770	12.8333	0	0	1	0	0	0	0
771	12.85	0	0	1	0	0	0	0
772	12.8667	0	0	0	0	0	0	0
773	12.8833	0	0	0	0	0	0	0
774	12.9	0	0	0	0	0	0	0
775	12.9167	0	0	0	0	0	0	0
776	12.9333	0	0	0	0	0	0	0
777	12.95	0	0	0	0	0	0	0
778	12.9667	0	0	0	0	0	0	0
779	12.9833	0	0	0	0	0	0	0
780	13	0	0	0	0	0	0	0
781	13.0167	0	0	0	0	0	0	0
782	13.0333	0	0	0	0	0	0	0
783	13.05	0	0	0	0	0	0	0
784	13.0667	0	0	0	0	0	0	0
785	13.0833	0	0	0	0	0	0	0
786	13.1	0	0	0	0	0	0	0
787	13.1167	0	0	0	0	0	0	0
788	13.1333	0	0	0	0	0	0	0
789	13.15	0	0	0	0	0	0	0
790	13.1667	0	0	0	0	0	0	0
791	13.1833	0	0	0	0	0	0	0
792	13.2	0	0	0	0	0	0	0
793	13.2167	0	0	0	0	0	0	0
794	13.2333	0	0	0	0	0	0	0
795	13.25	0	0	0	0	0	0	0
796	13.2667	0	0	0	0	0	0	0
797	13.2833	0	0	0	0	0	0	0
798	13.3	0	0	0	0	0	0	0
799	13.3167	0	0	0	0	0	0	0
800	13.3333	0	0	0	0	0	0	0
801	13.35	0	0	0	0	0	0	0
802	13.3667	0	0	0	0	0	0	0
803	13.3833	0	0	0	0	0	0	0
804	13.4	0	0	0	0	0	0	0
805	13.4167	0	0	0	0	0	0	0
806	13.4333	0	0	0	0	0	1	0
807	13.45	1	0	0	0	0	1	0
808	13.4667	1	0	0	0	0	1	0
809	13.4833	1	0	0	0	0	1	0
810	13.5	1	0	0	0	0	1	0
811	13.5167	1	0	0	0	0	1	0
812	13.5333	1	0	0	0	0	1	0
813	13.55	1	0	0	0	0	1	0
814	13.5667	1	0	0	0	0	1	0
815	13.5833	1	0	1	0	0	1	0
816	13.6	1	0	1	0	0	0	0
817	13.6167	0	0	0	0	0	0	0
818	13.6333	0	0	0	0	0	0	0
819	13.65	0	0	0	0	0	0	0
820	13.6667	0	0	0	0	0	0	0
821	13.6833	0	0	0	0	0	0	0
822	13.7	0	0	0	0	0	0	0
823	13.7167	0	0	0	0	0	0	0
824	13.7333	0	0	0	0	0	0	0
825	13.75	0	0	0	0	0	0	0
826	13.7667	0	0	0	0	0	0	0
827	13.7833	0	0	0	0	0	0	0
828	13.8	0	0	0	0	0	0	0
829	13.8167	0	0	0	0	0	0	0
830	13.8333	0	0	0	0	0	0	0
831	13.85	0	0	0	0	0	0	0
832	13.8667	1	0	0	0	0	0	0
833	13.8833	1	0	0	0	0	0	0
834	13.9	1	0	0	0	0	0	0
835	13.9167	1	0	0	0	0	0	0
836	13.9333	0	0	0	0	0	0	0
837	13.95	0	0	0	0	0	0	0
838	13.9667	0	0	0	0	0	0	0
839	13.9833	0	0	0	0	0	0	0
840	14	0	0	0	0	0	0	0
841	14.0167	0	0	0	0	0	0	0
842	14.0333	0	0	0	0	0	0	0
843	14.05	0	0	0	0	0	0	0
844	14.0667	0	0	0	0	0	0	0
845	14.0833	0	0	0	0	0	1	0
846	14.1	0	0	0	0	0	1	0
847	14.1167	0	0	0	0	0	1	0
848	14.1333	0	0	0	0	0	0	0
849	14.15	0	0	0	0	0	0	0
850	14.1667	1	0	0	0	0	0	0
851	14.1833	1	0	0	0	0	0	0
852	14.2	1	0	0	0	0	0	0
853	14.2167	1	0	0	0	0	0	0
854	14.2333	1	0	0	0	1	0	0
855	14.25	1	0	0	0	1	0	0
856	14.2667	0	0	0	0	1	0	0
857	14.2833	0	0	0	0	1	0	0
858	14.3	0	0	0	0	1	0	0
859	14.3167	0	0	0	0	1	0	0
860	14.3333	0	0	0	0	1	0	0
861	14.35	0	0	0	0	0	0	0
862	14.3667	0	0	0	0	0	0	0
863	14.3833	0	0	0	0	0	0	0
864	14.4	0	0	0	0	0	0	0
865	14.4167	0	0	0	0	0	0	0
866	14.4333	0	0	0	0	0	0	0
867	14.45	0	0	0	0	0	0	0
868	14.4667	0	1	0	0	0	0	0
869	14.4833	0	1	0	0	0	0	0
870	14.5	0	1	0	0	0	0	0
871	14.5167	0	1	0	0	0	0	0
872	14.5333	0	0	0	0	0	0	0
873	14.55	0	0	0	0	0	0	0
874	14.5667	0	0	0	0	0	0	0
875	14.5833	0	0	0	0	0	0	0
876	14.6	0	0	0	0	0	0	0
877	14.6167	0	0	0	0	0	0	0
878	14.6333	0	0	0	0	0	0	0
879	14.65	0	0	0	0	0	0	0
880	14.6667	0	0	0	0	0	0	0
881	14.6833	0	0	0	0	0	0	0
882	14.7	0	0	0	0	0	0	0
883	14.7167	0	0	0	0	0	0	0
884	14.7333	0	0	0	0	0	0	0
885	14.75	0	0	0	0	0	0	0
886	14.7667	0	0	0	0	0	0	0
887	14.7833	0	0	0	0	0	0	0
888	14.8	0	0	0	0	0	0	0
889	14.8167	0	0	0	0	0	0	0
890	14.8333	0	0	0	0	0	0	0
891	14.85	0	0	0	0	0	0	0
892	14.8667	0	0	0	0	0	0	0
893	14.8833	0	0	0	0	0	0	0
894	14.9	0	0	0	0	0	0	0
895	14.9167	0	0	0	0	0	0	0
896	14.9333	0	0	0	0	0	0	0
897	14.95	0	0	0	0	0	0	0
898	14.9667	0	0	0	0	0	0	0
899	14.9833	0	0	0	0	0	0	0
900	15	0	0	0	0	0	0	0
901	15.0167	0	0	0	0	0	0	0
902	15.0333	0	0	0	0	0	0	0
903	15.05	0	0	0	0	0	0	0
904	15.0667	0	0	0	0	0	0	0
905	15.0833	0	0	0	0	0	0	0
906	15.1	0	0	0	0	0	0	0
907	15.1167	0	0	0	0	0	0	0
908	15.1333	0	0	0	0	0	0	0
909	15.15	0	0	0	0	0	0	0
910	15.1667	0	0	0	0	0	0	0
911	15.1833	0	0	0	0	0	0	0
912	15.2	0	0	0	0	0	0	0
913	15.2167	0	0	0	0	0	0	0
914	15.2333	0	0	0	0	0	0	0
915	15.25	0	0	0	0	0	0	0
916	15.2667	0	0	0	0	0	0	0
917	15.2833	0	0	0	0	0	0	0
918	15.3	0	0	0	0	0	0	0
919	15.3167	0	0	0	0	0	0	0
920	15.3333	0	0	0	0	0	0	0
921	15.35	0	0	0	0	0	0	0
922	15.3667	0	0	0	0	0	0	0
923	15.3833	0	0	0	0	0	0	0
924	15.4	0	0	0	0	0	0	0
925	15.4167	0	0	0	0	0	0	0
926	15.4333	0	0	0	0	0	0	0
927	15.45	0	0	0	0	0	0	0
928	15.4667	0	0	0	0	0	0	0
929	15.4833	0	0	0	0	0	0	0
930	15.5	0	0	0	0	0	0	0
931	15.5167	0	0	0	0	0	0	0
932	15.5333	0	0	0	0	0	0	0
933	15.55	0	0	0	0	0	0	0
934	15.5667	0	0	0	0	0	0	0
935	15.5833	0	0	0	0	0	0	0
936	15.6	0	0	0	0	0	0	0
937	15.6167	0	0	0	0	0	0	0
938	15.6333	0	0	0	0	0	0	0
939	15.65	0	0	0	0	0	0	0
940	15.6667	0	0	0	0	0	0	0
941	15.6833	0	0	0	0	0	0	0
942	15.7	0	0	0	0	0	0	0
943	15.7167	0	0	0	0	0	0	0
944	15.7333	0	0	1	0	0	0	0
945	15.75	0	0	1	0	0	0	0
946	15.7667	0	0	1	0	0	0	0
947	15.7833	0	0	1	0	0	0	0
948	15.8	0	0	0	0	0	0	0
949	15.8167	0	0	0	0	0	0	0
950	15.8333	0	0	0	0	0	2	0
951	15.85	0	0	0	0	0	2	0
952	15.8667	0	0	0	0	0	2	0
953	15.8833	0	0	0	0	0	2	0
954	15.9	0	0	0	0	0	2	0
955	15.9167	0	0	0	0	0	2	0
956	15.9333	0	0	0	0	0	2	0
957	15.95	0	0	0	0	0	2	0
958	15.9667	0	0	0	0	0	2	0
959	15.9833	0	0	0	0	0	2	0
960	16	0	0	0	0	0	2	0
961	16.0167	0	0	0	0	0	0	0
962	16.0333	0	0	0	0	0	0	0
963	16.05	0	0	0	0	0	0	0
964	16.0667	0	0	0	0	0	0	0
965	16.0833	0	0	0	0	0	0	0
966	16.1	0	0	0	0	0	0	0
967	16.1167	0	0	0	0	0	0	0
968	16.1333	0	0	0	0	0	0	0
969	16.15	0	0	0	0	0	0	0
970	16.1667	0	0	0	0	0	0	0
971	16.1833	0	0	0	0	0	0	0
972	16.2	0	0	0	0	0	0	0
973	16.2167	0	0	0	0	0	0	0
974	16.2333	0	0	0	0	0	0	0
975	16.25	0	0	0	0	0	0	0
976	16.2667	0	0	0	0	0	0	0
977	16.2833	0	0	0	0	0	0	0
978	16.3	0	0	0	0	0	0	0
979	16.3167	0	0	0	0	0	0	0
980	16.3333	0	0	1	0	0	0	0
981	16.35	0	0	1	0	0	0	0
982	16.3667	0	0	1	0	0	0	0
983	16.3833	0	0	1	0	0	0	0
984	16.4	0	0	1	0	0	0	0
985	16.4167	0	0	1	0	0	0	0
986	16.4333	0	0	1	0	0	0	0
987	16.45	0	0	1	0	0	0	0
988	16.4667	0	0	1	0	0	0	0
989	16.4833	0	0	1	0	0	0	0
990	16.5	0	0	1	0	0	0	0
991	16.5167	0	0	0	0	0	0	0
992	16.5333	0	0	0	0	0	0	0
993	16.55	0	0	0	0	0	0	0
994	16.5667	0	0	0	0	0	0	0
995	16.5833	1	0	0	0	0	0	0
996	16.6	1	0	0	0	0	0	0
997	16.6167	1	0	0	0	0	0	0
998	16.6333	1	0	0	0	0	0	0
999	16.65	1	0	0	0	0	0	0
1000	16.6667	0	0	0	0	0	0	0
1001	16.6833	0	0	0	0	0	0	0
1002	16.7	0	0	0	0	0	0	0
1003	16.7167	0	0	0	0	0	0	0
1004	16.7333	0	0	0	0	0	0	0
1005	16.75	0	0	0	0	0	0	0
1006	16.7667	0	0	0	0	0	0	0
1007	16.7833	0	0	0	0	0	0	0
1008	16.8	0	0	0	0	0	0	0
1009	16.8167	0	0	0	0	0	0	0
1010	16.8333	0	0	0	0	0	0	0
1011	16.85	0	0	0	0	0	0	0
1012	16.8667	0	0	0	0	0	0	0
1013	16.8833	0	0	0	0	0	0	0
1014	16.9	1	0	0	0	0	0	0
1015	16.9167	1	0	0	0	0	0	0
1016	16.9333	1	0	0	0	0	0	0
1017	16.95	1	0	0	0	0	0	0
1018	16.9667	1	0	0	0	0	0	0
1019	16.9833	1	0	0	0	0	0	0
1020	17	1	0	0	0	0	0	0
1021	17.0167	1	0	0	0	0	0	0
1022	17.0333	1	0	0	0	0	0	0
1023	17.05	1	0	0	0	0	0	0
1024	17.0667	1	0	0	0	0	0	0
1025	17.0833	1	0	0	0	0	0	0
1026	17.1	1	0	0	0	0	0	0
1027	17.1167	1	0	0	0	0	0	0
1028	17.1333	0	0	0	0	0	0	0
1029	17.15	0	0	0	0	0	0	0
1030	17.1667	0	0	0	0	0	0	0
1031	17.1833	0	0	0	0	0	0	0
1032	17.2	0	0	0	0	0	0	0
1033	17.2167	0	0	0	0	0	0	0
1034	17.2333	0	0	0	0	0	0	0
1035	17.25	0	0	0	0	0	0	0
1036	17.2667	0	0	0	0	0	0	0
1037	17.2833	0	0	1	0	0	0	0
1038	17.3	0	0	1	0	0	0	0
1039	17.3167	0	0	1	0	0	0	0
1040	17.3333	1	0	1	0	0	0	0
1041	17.35	1	0	1	0	0	0	0
1042	17.3667	1	0	1	0	0	0	0
1043	17.3833	0	0	1	0	0	0	0
1044	17.4	0	0	1	0	0	0	0
1045	17.4167	0	0	1	0	0	0	0
1046	17.4333	0	0	1	0	0	0	0
1047	17.45	0	0	1	0	0	0	0
1048	17.4667	0	0	1	0	0	0	0
1049	17.4833	0	0	1	0	0	0	0
1050	17.5	0	0	1	0	0	0	0
1051	17.5167	0	0	1	0	0	0	0
1052	17.5333	0	0	1	0	0	0	0
1053	17.55	0	0	1	0	0	0	0
1054	17.5667	0	0	1	0	0	0	0
1055	17.5833	0	0	1	0	0	0	0
1056	17.6	0	0	1	0	0	0	0
1057	17.6167	0	0	1	0	0	0	0
1058	17.6333	0	0	1	0	0	0	0
1059	17.65	0	0	1	0	0	0	0
1060	17.6667	0	0	1	0	0	0	0
1061	17.6833	0	0	2	0	0	0	0
1062	17.7	0	0	2	0	0	0	0
1063	17.7167	0	0	2	0	0	0	0
1064	17.7333	1	0	1	0	0	0	0
1065	17.75	1	0	1	0	0	0	0
1066	17.7667	1	0	1	0	0	0	0
1067	17.7833	1	0	1	0	0	0	0
1068	17.8	1	0	1	0	0	0	0
1069	17.8167	0	0	1	0	0	0	0
1070	17.8333	0	1	0	0	0	0	0
1071	17.85	0	1	0	0	0	0	0
1072	17.8667	0	1	0	0	0	0	0
1073	17.8833	0	1	0	0	0	0	0
1074	17.9	0	1	0	0	0	0	0
1075	17.9167	0	1	0	0	0	0	0
1076	17.9333	0	0	0	0	0	0	0
1077	17.95	0	0	0	0	0	0	0
1078	17.9667	0	0	0	0	0	0	0
1079	17.9833	0	0	0	0	0	0	0
1080	18	0	0	0	0	0	0	0
1081	18.0167	0	0	0	370	0	0	0
1082	18.0333	0	0	0	370	0	0	0
1083	18.05	0	0	0	370	0	0	0
1084	18.0667	0	0	0	370	0	0	0
1085	18.0833	0	0	0	370	0	0	0
1086	18.1	0	0	0	370	0	0	0
1087	18.1167	0	0	0	370	0	0	0
1088	18.1333	0	0	0	370	0	0	0
1089	18.15	0	0	0	370	0	0	0
1090	18.1667	0	0	0	370	0	0	0
1091	18.1833	0	0	0	370	0	0	0
1092	18.2	0	0	0	370	0	0	0
1093	18.2167	0	0	0	370	0	0	0
1094	18.2333	0	0	0	370	0	0	0
1095	18.25	0	0	0	370	0	0	0
1096	18.2667	0	0	0	370	0	0	0
1097	18.2833	0	0	0	370	0	0	0
1098	18.3	0	0	0	370	0	0	0
1099	18.3167	0	0	0	370	0	0	0
1100	18.3333	0	0	0	370	0	0	0
1101	18.35	0	0	0	370	0	0	0
1102	18.3667	0	0	0	370	0	0	0
1103	18.3833	0	0	0	370	0	0	0
1104	18.4	0	0	0	370	0	0	0
1105	18.4167	0	0	0	370	0	0	0
1106	18.4333	0	0	0	370	0	0	0
1107	18.45	0	0	0	370	0	0	0
1108	18.4667	0	0	0	370	0	0	0
1109	18.4833	0	0	0	370	0	0	0
1110	18.5	0	0	0	370	0	0	0
1111	18.5167	0	0	0	370	0	0	0
1112	18.5333	0	2	0	370	0	0	0
1113	18.55	0	2	0	370	0	0	0
1114	18.5667	0	2	0	370	0	0	0
1115	18.5833	0	2	0	370	0	0	0
1116	18.6	0	3	0	370	0	0	0
1117	18.6167	0	3	0	370	0	0	0
1118	18.6333	0	3	0	370	0	0	0
1119	18.65	0	3	0	370	0	0	0
1120	18.6667	0	2	0	370	0	0	0
1121	18.6833	0	2	0	370	0	0	0
1122	18.7	0	2	0	370	0	0	0
1123	18.7167	0	2	0	370	0	0	0
1124	18.7333	0	2	0	370	0	0	0
1125	18.75	0	2	0	370	0	0	0
1126	18.7667	0	2	0	370	0	0	0
1127	18.7833	0	1	0	370	0	0	0
1128	18.8	0	1	0	370	0	0	0
1129	18.8167	0	1	0	370	0	0	0
1130	18.8333	2	0	0	370	0	0	0
1131	18.85	2	0	0	370	0	0	0
1132	18.8667	2	0	0	370	0	0	0
1133	18.8833	2	0	0	370	0	0	0
1134	18.9	2	0	0	370	0	0	0
1135	18.9167	2	0	0	370	0	0	0
1136	18.9333	2	0	0	370	0	0	0
1137	18.95	2	0	0	370	0	0	0
1138	18.9667	2	0	0	370	0	0	0
1139	18.9833	2	0	0	370	0	0	0
1140	19	2	0	0	370	0	0	0
1141	19.0167	2	0	0	370	0	0	0
1142	19.0333	2	0	0	370	0	0	0
1143	19.05	2	0	0	370	0	0	0
1144	19.0667	0	0	0	370	0	0	0
1145	19.0833	0	0	0	370	0	0	0
1146	19.1	0	0	0	370	0	0	0
1147	19.1167	0	0	0	370	0	0	0
1148	19.1333	0	0	0	370	0	0	0
1149	19.15	0	0	0	370	0	0	0
1150	19.1667	0	0	0	370	0	0	0
1151	19.1833	0	0	0	370	0	0	0
1152	19.2	0	0	0	370	0	0	0
1153	19.2167	0	0	0	370	0	0	0
1154	19.2333	0	0	0	370	0	0	0
1155	19.25	0	0	0	370	0	0	0
1156	19.2667	0	0	0	370	0	0	0
1157	19.2833	0	0	0	370	0	0	0
1158	19.3	0	0	0	370	0	0	0
1159	19.3167	2	0	0	370	0	0	0
1160	19.3333	2	0	0	370	0	0	0
1161	19.35	2	0	0	370	0	0	0
1162	19.3667	2	0	0	370	0	0	0
1163	19.3833	2	0	0	370	0	0	0
1164	19.4	2	0	0	370	0	0	0
1165	19.4167	2	0	0	370	0	0	0
1166	19.4333	2	0	0	370	0	0	0
1167	19.45	3	0	0	370	0	0	0
1168	19.4667	3	0	0	370	0	0	0
1169	19.4833	3	0	0	370	0	0	0
1170	19.5	3	0	0	370	0	0	0
1171	19.5167	3	0	0	370	0	0	0
1172	19.5333	3	0	0	370	0	0	0
1173	19.55	3	0	0	370	0	0	0
1174	19.5667	3	0	0	370	0	0	0
1175	19.5833	4	0	0	370	0	0	0
1176	19.6	4	0	0	370	0	0	0
1177	19.6167	4	0	0	370	0	0	0
1178	19.6333	4	0	0	370	0	0	0
1179	19.65	4	0	0	370	0	0	0
1180	19.6667	4	0	0	370	0	0	0
1181	19.6833	4	0	0	370	0	0	0
1182	19.7	4	0	0	370	0	0	0
1183	19.7167	4	0	0	370	0	0	0
1184	19.7333	4	0	0	370	0	0	0
1185	19.75	4	0	0	370	0	0	0
1186	19.7667	4	0	0	370	0	0	0
1187	19.7833	4	0	0	370	0	0	0
1188	19.8	4	0	0	370	0	0	0
1189	19.8167	4	0	0	370	0	0	0
1190	19.8333	4	0	0	370	0	0	0
1191	19.85	1	0	0	370	0	0	0
1192	19.8667	1	0	0	370	0	0	0
1193	19.8833	1	0	0	370	0	0	0
1194	19.9	1	0	0	370	0	0	0
1195	19.9167	1	0	0	370	0	0	0
1196	19.9333	1	0	0	370	0	0	0
1197	19.95	1	0	0	370	0	0	0
1198	19.9667	1	0	0	370	0	0	0
1199	19.9833	0	0	0	370	0	0	0
1200	20	0	0	0	370	0	0	0
1201	20.0167	0	0	0	370	0	0	0
1202	20.0333	0	0	0	370	0	0	0
1203	20.05	0	0	0	370	0	0	0
1204	20.0667	0	0	0	370	0	0	0
1205	20.0833	0	0	0	370	0	0	0
1206	20.1	0	0	0	370	0	0	0
1207	20.1167	0	0	0	370	0	0	0
1208	20.1333	0	0	0	370	0	0	0
1209	20.15	0	0	0	370	0	0	0
1210	20.1667	0	0	0	370	0	0	0
1211	20.1833	0	0	0	370	0	0	0
1212	20.2	0	0	0	370	0	0	0
1213	20.2167	0	0	0	370	0	0	0
1214	20.2333	0	0	0	370	0	0	0
1215	20.25	0	0	0	370	0	0	0
1216	20.2667	0	0	0	370	0	0	0
1217	20.2833	0	0	0	370	0	0	0
1218	20.3	0	0	0	370	0	0	0
1219	20.3167	0	0	0	370	0	0	0
1220	20.3333	0	0	0	370	0	0	0
1221	20.35	0	0	0	370	0	0	0
1222	20.3667	0	0	0	370	0	0	0
1223	20.3833	0	0	0	370	0	0	0
1224	20.4	0	0	0	370	0	0	0
1225	20.4167	0	0	0	370	0	0	0
1226	20.4333	0	0	0	370	0	0	0
1227	20.45	0	0	0	370	0	0	0
1228	20.4667	0	0	0	370	0	0	0
1229	20.4833	0	0	0	370	0	0	0
1230	20.5	0	0	0	370	0	0	0
1231	20.5167	0	0	0	370	0	0	0
1232	20.5333	0	0	0	370	0	0	0
1233	20.55	0	0	0	370	0	0	0
1234	20.5667	0	0	0	370	0	0	0
1235	20.5833	0	0	0	370	0	0	0
1236	20.6	0	0	0	370	0	0	0
1237	20.6167	0	0	0	370	0	0	0
1238	20.6333	0	0	0	370	0	0	0
1239	20.65	0	0	0	370	0	0	0
1240	20.6667	0	0	0	370	0	0	0
1241	20.6833	0	0	0	370	0	0	0
1242	20.7	0	0	0	370	0	0	0
1243	20.7167	0	0	0	370	0	0	0
1244	20.7333	2	0	0	370	0	0	0
1245	20.75	2	0	0	370	0	0	0
1246	20.7667	2	0	0	370	0	0	0
1247	20.7833	2	0	0	370	0	0	0
1248	20.8	2	0	0	370	0	0	0
1249	20.8167	2	0	0	370	0	0	0
1250	20.8333	0	0	0	370	0	0	0
1251	20.85	0	0	0	370	0	0	0
1252	20.8667	0	0	0	370	0	0	0
1253	20.8833	0	0	0	370	0	0	0
1254	20.9	0	0	0	370	0	0	0
1255	20.9167	0	0	0	370	0	0	0
1256	20.9333	0	0	0	370	0	0	0
1257	20.95	0	0	0	370	0	0	0
1258	20.9667	1	0	0	370	0	0	0
1259	20.9833	1	0	0	370	0	0	0
1260	21	0	0	0	370	0	0	0
1261	21.0167	0	0	0	370	0	0	0
1262	21.0333	0	0	0	370	0	0	0
1263	21.05	0	0	0	370	0	0	0
1264	21.0667	0	0	0	370	0	0	0
1265	21.0833	0	0	0	370	0	0	0
1266	21.1	0	0	0	370	0	0	0
1267	21.1167	0	0	0	370	0	0	0
1268	21.1333	0	0	0	370	0	0	0
1269	21.15	0	0	0	370	0	0	0
1270	21.1667	0	0	0	370	0	0	0
1271	21.1833	0	0	0	370	0	0	0
1272	21.2	0	0	0	370	0	0	0
1273	21.2167	0	0	0	370	0	0	0
1274	21.2333	0	0	0	370	0	0	0
1275	21.25	0	0	0	370	0	0	0
1276	21.2667	0	0	0	370	0	0	0
1277	21.2833	0	0	0	370	0	0	0
1278	21.3	0	0	0	370	0	0	0
1279	21.3167	0	0	0	370	0	0	0
1280	21.3333	0	0	0	370	0	0	0
1281	21.35	0	0	0	370	0	0	0
1282	21.3667	0	0	0	370	0	0	0
1283	21.3833	0	0	0	370	0	0	0
1284	21.4	0	0	0	370	0	0	0
1285	21.4167	0	0	0	370	0	0	0
1286	21.4333	0	0	0	370	0	0	0
1287	21.45	0	0	0	370	0	0	0
1288	21.4667	0	0	0	370	0	0	0
1289	21.4833	0	0	0	370	0	0	0
1290	21.5	0	0	0	370	0	0	0
1291	21.5167	0	0	0	370	0	0	0
1292	21.5333	0	0	0	370	0	0	0
1293	21.55	0	0	0	370	0	0	0
1294	21.5667	0	0	0	370	0	0	0
1295	21.5833	0	0	0	370	0	0	0
1296	21.6	0	0	0	370	0	0	0
1297	21.6167	0	0	0	370	0	0	0
1298	21.6333	0	0	0	370	0	0	0
1299	21.65	0	0	0	370	0	0	0
1300	21.6667	0	0	0	370	0	0	0
1301	21.6833	0	0	0	370	0	0	0
1302	21.7	0	0	0	370	0	0	0
1303	21.7167	0	0	0	370	0	0	0
1304	21.7333	0	0	0	370	0	0	0
1305	21.75	0	0	0	370	0	0	0
1306	21.7667	0	0	0	370	0	0	0
1307	21.7833	0	0	0	370	0	0	0
1308	21.8	0	0	0	370	0	0	0
1309	21.8167	0	0	0	370	0	0	0
1310	21.8333	0	0	0	370	0	0	0
1311	21.85	0	0	0	370	0	0	0
1312	21.8667	0	0	0	370	0	0	0
1313	21.8833	0	0	0	370	0	0	0
1314	21.9	0	0	0	370	0	0	0
1315	21.9167	0	0	0	370	0	0	0
1316	21.9333	0	1	0	370	0	0	0
1317	21.95	0	1	0	370	0	0	0
1318	21.9667	0	1	0	370	0	0	0
1319	21.9833	0	1	0	370	0	0	0
1320	22	0	1	0	370	0	0	0
1321	22.0167	0	0	0	370	0	0	0
1322	22.0333	0	0	0	370	0	0	0
1323	22.05	0	0	0	370	0	0	0
1324	22.0667	0	0	0	370	0	0	0
1325	22.0833	0	0	0	370	0	0	0
1326	22.1	0	0	0	370	0	0	0
1327	22.1167	0	0	0	370	0	0	0
1328	22.1333	0	0	0	370	0	0	0
1329	22.15	0	0	0	370	0	0	0
1330	22.1667	0	0	0	370	0	0	0
1331	22.1833	0	0	0	370	0	0	0
1332	22.2	0	0	0	370	0	0	0
1333	22.2167	0	0	0	370	0	0	0
1334	22.2333	0	0	0	370	0	0	0
1335	22.25	0	0	0	370	0	0	0
1336	22.2667	0	0	0	370	0	0	0
1337	22.2833	0	0	0	370	0	0	0
1338	22.3	0	0	0	370	0	0	0
1339	22.3167	0	0	0	370	0	0	0
1340	22.3333	0	0	0	370	0	0	0
1341	22.35	0	0	0	370	0	0	0
1342	22.3667	0	0	0	370	0	0	0
1343	22.3833	0	0	0	370	0	0	0
1344	22.4	0	0	0	370	0	0	0
1345	22.4167	0	0	0	370	0	0	0
1346	22.4333	0	0	0	370	0	0	0
1347	22.45	0	0	0	370	0	0	0
1348	22.4667	0	0	0	370	0	0	0
1349	22.4833	0	0	1	370	0	0	0
1350	22.5	0	0	1	370	0	0	0
1351	22.5167	0	0	1	370	0	0	0
1352	22.5333	0	0	1	370	0	0	0
1353	22.55	0	0	1	370	0	0	0
1354	22.5667	0	0	1	370	0	0	0
1355	22.5833	0	0	1	370	0	0	0
1356	22.6	0	0	1	370	0	0	0
1357	22.6167	0	0	1	370	0	0	0
1358	22.6333	0	0	0	370	0	0	0
1359	22.65	0	0	0	370	0	0	0
1360	22.6667	0	0	0	370	0	0	0
1361	22.6833	0	0	0	370	0	0	0
1362	22.7	0	0	0	370	0	0	0
1363	22.7167	0	0	0	370	0	0	0
1364	22.7333	0	0	0	370	0	0	0
1365	22.75	0	0	0	370	0	0	0
1366	22.7667	0	0	0	370	0	0	0
1367	22.7833	0	0	0	370	0	0	0
1368	22.8	0	0	0	370	0	0	0
1369	22.8167	0	0	0	370	0	0	0
1370	22.8333	0	0	0	370	0	0	0
1371	22.85	0	0	0	370	0	0	0
1372	22.8667	0	0	0	370	0	0	0
1373	22.8833	0	0	0	370	0	0	0
1374	22.9	0	0	0	370	0	0	0
1375	22.9167	0	0	0	370	0	0	0
1376	22.9333	0	0	0	370	0	0	0
1377	22.95	0	0	0	370	0	0	0
1378	22.9667	0	0	0	370	0	0	0
1379	22.9833	0	0	0	370	0	0	0
1380	23	0	0	0	370	0	0	0
1381	23.0167	0	0	0	370	0	0	0
1382	23.0333	0	0	0	370	0	0	0
1383	23.05	0	0	0	370	0	0	0
1384	23.0667	0	0	0	370	0	0	0
1385	23.0833	0	0	0	370	0	0	0
1386	23.1	0	0	0	370	0	0	0
1387	23.1167	0	0	0	370	0	0	0
1388	23.1333	0	0	0	370	0	0	0
1389	23.15	0	0	0	370	0	0	0
1390	23.1667	0	0	0	370	0	0	0
1391	23.1833	0	0	0	370	1	0	0
1392	23.2	0	0	0	370	1	0	0
1393	23.2167	0	0	0	370	1	0	0
1394	23.2333	0	0	0	370	1	0	0
1395	23.25	0	0	0	370	1	0	0
1396	23.2667	0	0	0	370	1	0	0
1397	23.2833	0	0	0	370	1	0	0
1398	23.3	0	0	0	370	1	0	0
1399	23.3167	0	0	0	370	0	0	0
1400	23.3333	0	0	0	370	0	0	0
1401	23.35	0	0	0	370	0	0	0
1402	23.3667	0	0	0	370	0	0	0
1403	23.3833	0	1	0	370	0	0	0
1404	23.4	0	1	0	370	0	0	0
1405	23.4167	0	1	0	370	0	0	0
1406	23.4333	0	1	0	370	0	0	0
1407	23.45	0	1	0	370	0	0	0
1408	23.4667	0	0	0	370	0	0	0
1409	23.4833	0	0	0	370	0	0	0
1410	23.5	0	0	0	370	0	0	0
1411	23.5167	0	0	0	370	0	0	0
1412	23.5333	0	0	0	370	0	0	0
1413	23.55	0	0	0	370	0	0	0
1414	23.5667	0	0	0	370	0	0	0
1415	23.5833	0	0	1	370	0	0	0
1416	23.6	0	0	1	370	0	0	0
1417	23.6167	0	0	1	370	0	0	0
1418	23.6333	0	0	1	370	0	0	0
1419	23.65	0	0	1	370	0	0	0
1420	23.6667	0	0	1	370	0	0	0
1421	23.6833	0	0	1	370	0	0	0
1422	23.7	0	0	1	370	0	0	0
1423	23.7167	0	0	1	370	0	0	0
1424	23.7333	0	0	1	370	0	0	0
1425	23.75	0	0	0	370	0	0	0
1426	23.7667	0	0	0	370	0	0	0
1427	23.7833	0	0	0	370	0	0	0
1428	23.8	0	0	0	370	0	0	0
1429	23.8167	0	0	0	370	0	0	0
1430	23.8333	0	0	0	370	0	0	0
1431	23.85	0	0	0	370	0	0	0
1432	23.8667	0	0	0	370	0	0	0
1433	23.8833	0	0	0	370	0	0	0
1434	23.9	0	0	0	370	0	0	0
1435	23.9167	0	0	0	370	0	0	0
1436	23.9333	0	0	0	370	0	0	0
1437	23.95	0	0	0	370	0	0	0
1438	23.9667	0	0	0	96	0	0	0
1439	23.9833	0	0	0	96	0	0	0
1440	24	0	0	0	96	0	0	0
1441	24.0167	0	0	0	96	0	0	0
1442	24.0333	0	0	0	96	0	0	0
1443	24.05	0	0	0	96	0	0	0
1444	24.0667	0	0	0	96	0	0	0
1445	24.0833	0	0	1	96	0	0	0
1446	24.1	0	0	1	96	0	0	0
1447	24.1167	0	0	1	96	0	0	0
1448	24.1333	0	2	0	96	0	0	0
1449	24.15	0	2	0	96	0	0	0
1450	24.1667	0	2	0	96	0	0	0
1451	24.1833	0	2	0	96	0	0	0
1452	24.2	0	2	0	96	0	0	0
1453	24.2167	0	2	0	96	0	0	0
1454	24.2333	0	2	0	96	0	0	0
1455	24.25	0	2	0	96	0	0	0
1456	24.2667	0	2	0	96	0	0	0
1457	24.2833	0	2	0	96	0	0	0
1458	24.3	0	2	0	96	0	0	0
1459	24.3167	0	2	0	96	0	0	0
1460	24.3333	0	0	0	96	0	0	0
1461	24.35	0	0	0	96	0	0	0
1462	24.3667	0	1	0	96	0	0	0
1463	24.3833	0	1	0	96	0	0	0
1464	24.4	0	1	0	96	0	0	0
1465	24.4167	0	1	0	96	0	0	0
1466	24.4333	0	1	0	96	0	0	0
1467	24.45	0	1	0	96	0	0	0
1468	24.4667	0	1	0	96	0	0	0
1469	24.4833	0	1	0	96	0	0	0
1470	24.5	0	0	0	96	0	0	0
1471	24.5167	0	0	0	96	0	0	0
1472	24.5333	0	0	0	96	0	0	0
1473	24.55	0	0	0	96	0	0	0
1474	24.5667	0	0	0	96	0	0	0
1475	24.5833	0	0	0	96	0	0	0
1476	24.6	0	0	0	96	0	0	0
1477	24.6167	0	0	0	96	0	0	0
1478	24.6333	0	0	0	96	0	0	0
1479	24.65	0	0	0	96	0	0	0
1480	24.6667	0	0	0	96	0	0	0
1481	24.6833	0	0	0	96	0	0	0
1482	24.7	0	0	0	96	0	0	0
1483	24.7167	0	0	0	96	0	0	0
1484	24.7333	0	0	0	96	0	0	0
1485	24.75	0	0	0	96	0	0	0
1486	24.7667	0	0	0	96	0	0	0
1487	24.7833	0	0	0	96	0	0	0
1488	24.8	0	0	0	96	0	0	0
1489	24.8167	0	0	0	96	0	0	0
1490	24.8333	0	0	0	96	0	0	0
1491	24.85	0	0	0	96	0	0	0
1492	24.8667	0	0	0	96	0	0	0
1493	24.8833	0	0	0	96	0	0	0
1494	24.9	0	0	0	96	0	0	0
1495	24.9167	0	0	0	96	0	0	0
1496	24.9333	0	0	0	96	0	0	0
1497	24.95	0	0	0	96	0	0	0
1498	24.9667	0	0	0	96	0	0	0
1499	24.9833	0	0	0	96	0	0	0
1500	25	0	0	0	96	0	0	0
1501	25.0167	0	0	0	96	0	0	0
1502	25.0333	0	0	0	96	0	0	0
1503	25.05	0	0	0	96	0	0	0
1504	25.0667	0	0	0	96	0	0	0
1505	25.0833	0	0	0	96	0	0	0
1506	25.1	0	0	0	96	0	0	0
1507	25.1167	0	0	0	96	0	0	0
1508	25.1333	0	0	0	96	0	0	0
1509	25.15	0	0	0	96	0	0	0
1510	25.1667	0	0	0	96	0	0	0
1511	25.1833	0	0	0	96	0	0	0
1512	25.2	0	0	0	96	0	0	0
1513	25.2167	0	0	0	96	0	0	0
1514	25.2333	0	0	0	96	0	0	0
1515	25.25	0	0	0	96	0	0	0
1516	25.2667	0	0	0	96	0	0	0
1517	25.2833	0	0	0	96	0	0	0
1518	25.3	0	0	0	96	0	0	0
1519	25.3167	0	0	0	96	0	0	0
1520	25.3333	0	0	0	96	0	0	0
1521	25.35	0	0	0	96	0	0	0
1522	25.3667	0	0	0	96	0	0	0
1523	25.3833	0	0	0	96	0	0	0
1524	25.4	0	0	0	96	0	0	0
1525	25.4167	0	0	0	96	0	0	0
1526	25.4333	0	0	0	96	0	0	0
1527	25.45	0	0	0	96	0	0	0
1528	25.4667	0	0	0	96	0	0	0
1529	25.4833	0	0	0	96	0	0	0
1530	25.5	0	0	0	96	0	0	0
1531	25.5167	0	0	0	96	0	0	0
1532	25.5333	0	0	0	96	0	0	0
1533	25.55	0	0	0	96	0	0	0
1534	25.5667	0	0	0	96	0	0	0
1535	25.5833	0	0	0	96	0	0	0
1536	25.6	0	0	0	96	0	0	0
1537	25.6167	0	0	0	96	0	0	0
1538	25.6333	0	0	0	96	0	0	0
1539	25.65	0	0	0	96	0	0	0
1540	25.6667	0	0	0	96	0	0	0
1541	25.6833	0	0	0	96	0	0	0
1542	25.7	0	0	0	96	0	0	0
1543	25.7167	0	0	0	96	0	0	0
1544	25.7333	0	0	0	96	0	0	0
1545	25.75	0	0	0	96	0	0	0
1546	25.7667	0	0	0	96	0	0	0
1547	25.7833	0	0	0	96	0	0	0
1548	25.8	0	0	0	96	0	0	0
1549	25.8167	0	0	0	96	0	0	0
1550	25.8333	0	0	0	96	0	0	0
1551	25.85	0	0	0	96	0	0	0
1552	25.8667	0	0	0	96	0	0	0
1553	25.8833	0	0	0	96	0	0	0
1554	25.9	0	0	0	96	0	0	0
1555	25.9167	0	0	0	96	0	0	0
1556	25.9333	0	0	0	96	0	0	0
1557	25.95	0	0	0	96	0	0	0
1558	25.9667	0	0	0	96	0	0	0
1559	25.9833	0	0	0	96	0	0	0
1560	26	0	0	0	96	0	0	0
1561	26.0167	0	0	0	96	0	0	0
1562	26.0333	0	0	0	96	0	0	0
1563	26.05	0	0	0	96	0	0	0
1564	26.0667	0	0	0	96	0	0	0
1565	26.0833	0	0	0	96	0	0	0
1566	26.1	0	0	0	96	0	0	0
1567	26.1167	0	0	0	96	0	0	0
1568	26.1333	0	0	0	96	0	0	0
1569	26.15	0	0	0	96	0	0	0
1570	26.1667	0	0	0	96	0	0	0
1571	26.1833	0	0	1	96	0	0	0
1572	26.2	0	0	1	96	0	0	0
1573	26.2167	0	0	1	96	0	0	0
1574	26.2333	0	0	1	96	0	0	0
1575	26.25	0	0	1	96	0	0	0
1576	26.2667	0	0	1	96	0	0	0
1577	26.2833	0	0	1	96	0	0	0
1578	26.3	0	0	1	96	0	0	0
1579	26.3167	0	0	1	96	0	0	0
1580	26.3333	0	0	1	96	0	0	0
1581	26.35	0	0	1	96	0	0	0
1582	26.3667	0	0	1	96	0	0	0
1583	26.3833	0	0	1	96	0	0	0
1584	26.4	0	0	1	96	0	0	0
1585	26.4167	0	0	1	96	0	0	0
1586	26.4333	0	0	1	96	0	0	0
1587	26.45	0	0	1	96	0	0	0
1588	26.4667	0	0	1	96	0	0	0
1589	26.4833	0	0	1	96	0	0	0
1590	26.5	0	0	1	96	0	0	0
1591	26.5167	0	0	1	96	0	0	0
1592	26.5333	0	0	1	96	0	0	0
1593	26.55	0	0	1	96	0	0	0
1594	26.5667	0	0	1	96	0	0	0
1595	26.5833	0	0	1	96	0	0	0
1596	26.6	0	0	1	96	0	0	0
1597	26.6167	0	0	1	96	0	0	0
1598	26.6333	0	0	1	96	0	0	0
1599	26.65	0	0	1	96	0	0	0
1600	26.6667	0	0	1	96	0	0	0
1601	26.6833	0	0	1	96	0	0	0
1602	26.7	0	0	1	96	0	0	0
1603	26.7167	0	0	1	96	0	0	0
1604	26.7333	0	0	1	96	0	0	0
1605	26.75	0	0	1	96	0	0	0
1606	26.7667	0	0	1	96	0	0	0
1607	26.7833	0	0	1	96	0	0	0
1608	26.8	0	0	1	96	0	0	0
1609	26.8167	0	0	1	96	0	0	0
1610	26.8333	0	0	1	96	0	0	0
1611	26.85	0	0	1	96	0	0	0
1612	26.8667	0	0	1	96	0	0	0
1613	26.8833	0	0	1	96	0	0	0
1614	26.9	0	0	1	96	0	0	0
1615	26.9167	0	0	0	96	0	0	0
1616	26.9333	0	0	0	96	0	0	0
1617	26.95	0	0	0	96	0	0	0
1618	26.9667	0	0	1	96	0	0	0
1619	26.9833	0	0	1	96	0	0	0
1620	27	0	0	1	96	0	0	0
1621	27.0167	0	0	1	96	0	0	0
1622	27.0333	0	0	0	96	0	0	0
1623	27.05	0	0	0	96	0	0	0
1624	27.0667	0	0	0	96	0	0	0
1625	27.0833	0	0	0	96	0	0	0
1626	27.1	0	0	0	96	0	0	0
1627	27.1167	0	0	0	96	0	0	0
1628	27.1333	0	0	0	96	0	0	0
1629	27.15	0	0	0	96	0	0	0
1630	27.1667	0	0	0	96	0	0	0
1631	27.1833	0	0	0	96	0	0	0
1632	27.2	0	0	0	96	0	0	0
1633	27.2167	0	0	1	96	0	0	0
1634	27.2333	0	0	1	96	0	0	0
1635	27.25	0	0	1	96	0	0	0
1636	27.2667	0	0	1	96	0	0	0
1637	27.2833	0	0	1	96	0	0	0
1638	27.3	0	0	1	96	0	0	0
1639	27.3167	0	0	1	96	0	0	0
1640	27.3333	1	0	1	96	0	0	0
1641	27.35	1	0	1	96	0	0	0
1642	27.3667	1	0	1	96	0	0	0
1643	27.3833	1	0	1	96	0	0	0
1644	27.4	1	0	1	96	0	0	0
1645	27.4167	1	0	1	96	0	0	0
1646	27.4333	1	0	1	96	0	0	0
1647	27.45	1	0	1	96	0	0	0
1648	27.4667	1	0	1	96	0	0	0
1649	27.4833	1	0	1	96	0	0	0
1650	27.5	1	0	1	96	0	0	0
1651	27.5167	1	0	1	96	0	0	0
1652	27.5333	1	0	1	96	0	0	0
1653	27.55	1	0	1	96	0	0	0
1654	27.5667	1	0	1	96	0	0	0
1655	27.5833	1	0	1	96	0	0	0
1656	27.6	0	0	1	96	0	0	0
1657	27.6167	0	0	1	96	0	0	0
1658	27.6333	0	0	1	96	0	0	0
1659	27.65	0	0	1	96	0	0	0
1660	27.6667	0	0	1	96	0	0	0
1661	27.6833	0	0	1	96	0	0	0
1662	27.7	0	0	1	96	0	0	0
1663	27.7167	1	0	1	96	0	0	0
1664	27.7333	1	0	1	96	0	0	0
1665	27.75	1	0	1	96	0	0	0
1666	27.7667	1	0	1	96	0	0	0
1667	27.7833	1	0	1	96	0	0	0
1668	27.8	1	0	1	96	0	0	0
1669	27.8167	1	0	0	96	0	0	0
1670	27.8333	1	0	0	96	0	0	0
1671	27.85	1	0	0	96	0	0	0
1672	27.8667	1	0	0	96	0	0	0
1673	27.8833	1	0	0	96	0	0	0
1674	27.9	1	0	0	96	0	0	0
1675	27.9167	1	0	0	96	0	0	0
1676	27.9333	1	0	0	96	0	0	0
1677	27.95	1	0	0	96	0	0	0
1678	27.9667	1	0	0	96	0	0	0
1679	27.9833	1	0	0	96	0	0	0
1680	28	1	0	0	96	0	0	0
1681	28.0167	1	0	0	96	0	0	0
1682	28.0333	3	0	0	96	0	0	0
1683	28.05	2	0	0	96	0	0	0
1684	28.0667	2	0	0	96	0	0	0
1685	28.0833	2	0	0	96	0	0	0
1686	28.1	2	0	0	96	0	0	0
1687	28.1167	2	0	0	96	0	0	0
1688	28.1333	2	0	0	96	0	0	0
1689	28.15	2	0	0	96	0	0	0
1690	28.1667	2	0	0	96	0	0	0
1691	28.1833	2	0	0	96	0	0	0
1692	28.2	2	0	0	96	0	0	0
1693	28.2167	2	0	0	96	0	0	0
1694	28.2333	2	0	0	96	0	0	0
1695	28.25	2	0	0	96	0	0	0
1696	28.2667	2	0	0	96	0	0	0
1697	28.2833	2	0	0	96	0	0	0
1698	28.3	2	0	0	96	0	0	0
1699	28.3167	2	0	0	96	0	0	0
1700	28.3333	2	0	0	96	0	0	0
1701	28.35	2	0	0	96	0	0	0
1702	28.3667	2	0	0	96	0	0	0
1703	28.3833	2	0	0	96	0	0	0
1704	28.4	2	0	0	96	0	0	0
1705	28.4167	2	0	0	96	0	0	0
1706	28.4333	2	0	0	96	0	0	0
1707	28.45	2	0	0	96	0	0	0
1708	28.4667	2	0	0	96	0	0	0
1709	28.4833	2	0	0	96	0	0	0
1710	28.5	2	0	0	96	0	0	0
1711	28.5167	2	0	0	96	0	0	0
1712	28.5333	2	0	0	96	0	0	0
1713	28.55	2	0	0	96	0	0	0
1714	28.5667	2	0	0	96	0	0	0
1715	28.5833	2	0	0	96	0	0	0
1716	28.6	2	0	0	96	0	0	0
1717	28.6167	2	0	0	96	0	0	0
1718	28.6333	2	0	0	96	0	0	0
1719	28.65	2	0	0	96	0	0	0
1720	28.6667	1	0	0	96	0	0	0
1721	28.6833	1	0	0	96	0	0	0
1722	28.7	1	0	0	96	0	0	0
1723	28.7167	1	0	0	96	0	0	0
1724	28.7333	1	0	0	96	0	0	0
1725	28.75	1	0	0	96	0	0	0
1726	28.7667	1	0	0	96	0	0	0
1727	28.7833	1	0	1	96	0	0	0
1728	28.8	1	0	1	96	0	0	0
1729	28.8167	1	0	1	96	0	0	0
1730	28.8333	1	0	1	96	0	0	0
1731	28.85	1	0	1	96	0	0	0
1732	28.8667	1	0	1	96	0	0	0
1733	28.8833	1	0	1	96	0	0	0
1734	28.9	1	0	1	96	0	0	0
1735	28.9167	1	0	1	96	0	0	0
1736	28.9333	1	0	1	96	0	0	0
1737	28.95	1	0	1	96	0	0	0
1738	28.9667	1	0	1	96	0	0	0
1739	28.9833	1	1	1	96	0	0	0
1740	29	1	1	1	96	0	0	0
1741	29.0167	1	1	1	96	0	0	0
1742	29.0333	1	1	1	96	0	0	0
1743	29.05	1	1	1	96	0	0	0
1744	29.0667	1	1	1	96	0	0	0
1745	29.0833	1	1	1	96	0	0	0
1746	29.1	1	0	1	96	0	0	0
1747	29.1167	1	0	1	96	0	0	0
1748	29.1333	1	0	1	96	0	0	0
1749	29.15	1	0	1	96	0	0	0
1750	29.1667	1	0	1	96	0	0	0
1751	29.1833	1	0	1	96	0	0	0
1752	29.2	1	0	1	96	0	0	0
1753	29.2167	1	0	1	96	0	0	0
1754	29.2333	1	0	1	96	0	0	0
1755	29.25	1	0	1	96	0	0	0
1756	29.2667	1	0	1	96	0	0	0
1757	29.2833	1	0	1	96	0	0	0
1758	29.3	1	0	1	96	0	0	0
1759	29.3167	1	0	1	96	0	0	0
1760	29.3333	1	0	1	96	0	0	0
1761	29.35	1	0	1	96	0	0	0
1762	29.3667	1	0	0	96	0	0	0
1763	29.3833	1	0	0	96	0	0	0
1764	29.4	1	0	0	96	0	0	0
1765	29.4167	1	0	0	96	0	0	0
1766	29.4333	1	0	0	96	0	0	0
1767	29.45	1	0	0	96	0	0	0
1768	29.4667	1	0	0	96	0	0	0
1769	29.4833	1	0	0	96	0	0	0
1770	29.5	1	0	0	96	0	0	0
1771	29.5167	1	0	0	96	0	0	0
1772	29.5333	1	0	0	96	0	0	0
1773	29.55	1	0	0	96	0	0	0
1774	29.5667	1	0	0	96	0	0	0
1775	29.5833	1	0	1	96	0	0	0
1776	29.6	1	0	1	96	0	0	0
1777	29.6167	1	0	1	96	0	0	0
1778	29.6333	1	0	1	96	0	0	0
1779	29.65	1	0	1	96	0	0	0
1780	29.6667	1	0	1	96	0	0	0
1781	29.6833	1	0	1	96	0	0	0
1782	29.7	1	0	1	96	0	0	0
1783	29.7167	1	0	1	96	0	0	0
1784	29.7333	1	0	1	96	0	0	0
1785	29.75	1	0	1	96	0	0	0
1786	29.7667	1	0	1	96	0	0	0
1787	29.7833	1	0	1	96	0	0	0
1788	29.8	1	0	1	96	0	0	0
1789	29.8167	1	0	1	96	0	0	0
1790	29.8333	1	0	1	96	0	0	0
1791	29.85	1	0	1	96	0	0	0
1792	29.8667	1	0	1	96	0	0	0
1793	29.8833	1	0	1	96	0	0	0
1794	29.9	1	0	1	96	0	0	0
1795	29.9167	1	0	1	133	0	0	0
1796	29.9333	2	0	1	133	0	0	0
1797	29.95	2	0	1	133	0	0	0
1798	29.9667	2	0	1	133	0	0	0
1799	29.9833	2	0	1	133	0	0	0
1800	30	2	0	1	133	0	0	0
1801	30.0167	2	0	1	133	0	0	0
1802	30.0333	2	0	1	133	0	0	0
1803	30.05	2	0	1	133	0	0	0
1804	30.0667	2	0	1	133	0	0	0
1805	30.0833	2	0	1	133	0	0	0
1806	30.1	2	0	1	133	0	0	0
1807	30.1167	2	0	0	133	0	0	0
1808	30.1333	2	0	0	133	0	0	0
1809	30.15	2	0	0	133	0	0	0
1810	30.1667	2	0	0	133	0	0	0
1811	30.1833	2	0	0	133	0	0	0
1812	30.2	2	0	0	133	0	0	0
1813	30.2167	2	0	0	133	0	0	0
1814	30.2333	2	0	0	133	0	0	0
1815	30.25	2	0	0	133	0	0	0
1816	30.2667	2	0	0	133	0	0	0
1817	30.2833	2	0	0	133	0	0	0
1818	30.3	2	0	0	133	0	0	0
1819	30.3167	2	0	0	133	0	0	0
1820	30.3333	2	0	0	133	0	0	0
1821	30.35	2	0	0	133	0	0	0
1822	30.3667	2	0	0	133	0	0	0
1823	30.3833	2	0	0	133	0	0	0
1824	30.4	2	0	0	133	0	0	0
1825	30.4167	2	0	0	133	0	0	0
1826	30.4333	2	1	0	133	0	0	0
1827	30.45	2	1	0	133	0	0	0
1828	30.4667	2	1	0	133	0	0	0
1829	30.4833	2	1	0	133	0	0	0
1830	30.5	2	1	0	133	0	0	0
1831	30.5167	2	1	0	133	0	0	0
1832	30.5333	2	1	0	133	0	0	0
1833	30.55	2	1	0	133	0	0	0
1834	30.5667	2	1	0	133	0	0	0
1835	30.5833	2	1	0	133	0	0	0
1836	30.6	2	1	0	133	0	0	0
1837	30.6167	2	1	0	133	0	0	0
1838	30.6333	2	1	0	133	0	0	0
1839	30.65	2	0	0	133	0	0	0
1840	30.6667	2	0	0	133	0	0	0
1841	30.6833	2	0	0	133	0	0	0
1842	30.7	2	0	0	133	0	0	0
1843	30.7167	2	0	1	133	0	0	0
1844	30.7333	2	0	1	133	0	0	0
1845	30.75	2	0	0	133	0	0	0
1846	30.7667	2	0	0	133	0	0	0
1847	30.7833	2	0	0	133	0	0	0
1848	30.8	2	0	0	133	0	0	0
1849	30.8167	2	0	0	133	0	0	0
1850	30.8333	2	0	0	133	0	0	0
1851	30.85	2	0	0	133	0	0	0
1852	30.8667	2	0	0	133	0	0	0
1853	30.8833	2	0	0	133	0	0	0
1854	30.9	2	0	0	133	0	0	0
1855	30.9167	2	0	0	133	0	0	0
1856	30.9333	2	0	0	133	0	0	0
1857	30.95	2	0	0	133	0	0	0
1858	30.9667	2	0	0	133	0	0	0
1859	30.9833	2	0	0	133	0	0	0
1860	31	2	0	0	133	0	0	0
1861	31.0167	2	0	0	133	0	0	0
1862	31.0333	2	0	0	133	0	0	0
1863	31.05	2	0	0	133	0	0	0
1864	31.0667	2	0	0	133	0	0	0
1865	31.0833	2	0	0	133	0	0	0
1866	31.1	2	0	0	133	0	0	0
1867	31.1167	2	0	0	133	0	0	0
1868	31.1333	2	0	0	133	0	0	0
1869	31.15	2	0	0	133	0	0	0
1870	31.1667	2	0	0	133	0	0	0
1871	31.1833	3	0	0	133	0	0	0
1872	31.2	1	0	0	133	0	0	0
1873	31.2167	1	0	0	133	0	0	0
1874	31.2333	1	0	1	133	0	0	0
1875	31.25	1	0	1	133	0	0	0
1876	31.2667	1	0	1	133	0	0	0
1877	31.2833	1	0	1	133	0	0	0
1878	31.3	1	0	1	133	0	0	0
1879	31.3167	0	0	1	133	0	0	0
1880	31.3333	0	0	1	133	0	0	0
1881	31.35	0	0	1	133	0	0	0
1882	31.3667	0	0	1	133	0	0	0
1883	31.3833	0	0	1	133	0	0	0
1884	31.4	0	0	1	133	0	0	0
1885	31.4167	0	0	1	133	0	0	0
1886	31.4333	0	0	1	133	0	0	0
1887	31.45	0	0	1	133	0	0	0
1888	31.4667	0	0	1	133	0	0	0
1889	31.4833	0	0	1	133	0	0	0
1890	31.5	0	0	1	133	0	0	0
1891	31.5167	0	0	1	133	0	0	0
1892	31.5333	0	0	1	133	0	0	0
1893	31.55	0	0	1	133	0	0	0
1894	31.5667	0	0	1	133	0	0	0
1895	31.5833	0	0	1	133	0	0	0
1896	31.6	0	0	1	133	0	0	0
1897	31.6167	2	0	1	133	0	0	0
1898	31.6333	2	0	1	133	0	0	0
1899	31.65	2	0	1	133	0	0	0
1900	31.6667	2	0	1	133	0	0	0
1901	31.6833	2	0	1	133	0	0	0
1902	31.7	2	0	1	133	0	0	0
1903	31.7167	2	0	1	133	0	0	0
1904	31.7333	2	0	1	133	0	0	0
1905	31.75	2	0	1	133	0	0	0
1906	31.7667	2	0	1	133	0	0	0
1907	31.7833	2	0	1	133	0	0	0
1908	31.8	0	0	1	133	0	0	0
1909	31.8167	0	0	0	133	0	0	0
1910	31.8333	0	0	0	133	0	0	0
1911	31.85	0	0	0	133	0	0	0
1912	31.8667	0	0	0	133	0	0	0
1913	31.8833	0	0	0	133	0	0	0
1914	31.9	0	0	0	133	0	0	0
1915	31.9167	0	0	0	133	0	0	0
1916	31.9333	0	0	0	133	0	0	0
1917	31.95	0	0	0	133	0	0	0
1918	31.9667	0	0	0	133	0	0	0
1919	31.9833	4	0	0	133	0	0	0
1920	32	4	0	0	133	0	0	0
1921	32.0167	4	0	0	133	0	0	0
1922	32.0333	4	0	0	133	0	0	0
1923	32.05	4	0	0	133	0	0	0
1924	32.0667	3	0	0	133	0	0	0
1925	32.0833	3	0	0	133	0	0	0
1926	32.1	3	0	0	133	0	0	0
1927	32.1167	3	0	0	133	0	0	0
1928	32.1333	2	1	0	133	0	0	0
1929	32.15	2	1	0	133	0	0	0
1930	32.1667	2	1	0	133	0	0	0
1931	32.1833	2	0	0	133	0	0	0
1932	32.2	1	0	0	133	0	0	0
1933	32.2167	1	0	0	133	0	0	0
1934	32.2333	1	0	0	133	0	0	0
1935	32.25	1	0	0	133	0	0	0
1936	32.2667	1	0	0	133	0	0	0
1937	32.2833	1	0	0	133	0	0	0
1938	32.3	1	0	0	133	0	0	0
1939	32.3167	1	0	0	133	0	0	0
1940	32.3333	0	0	0	133	0	0	0
1941	32.35	0	0	0	133	0	0	0
1942	32.3667	0	0	0	133	0	0	0
1943	32.3833	0	0	0	133	0	0	0
1944	32.4	0	0	0	133	0	0	0
1945	32.4167	0	0	0	133	0	0	0
1946	32.4333	0	0	0	133	0	0	0
1947	32.45	0	0	0	133	0	0	0
1948	32.4667	0	0	0	133	0	0	0
1949	32.4833	0	0	0	133	0	0	0
1950	32.5	0	0	0	133	0	0	0
1951	32.5167	0	0	0	133	0	0	0
1952	32.5333	0	0	0	133	0	0	0
1953	32.55	0	0	0	133	0	0	0
1954	32.5667	0	0	0	133	0	0	0
1955	32.5833	0	0	0	133	0	0	0
1956	32.6	0	0	0	133	0	0	0
1957	32.6167	0	0	0	133	0	0	0
1958	32.6333	0	0	0	133	0	0	0
1959	32.65	0	0	0	133	0	0	0
1960	32.6667	0	0	0	133	0	0	0
1961	32.6833	0	0	0	133	0	0	0
1962	32.7	0	0	0	133	0	0	0
1963	32.7167	0	0	0	133	0	0	0
1964	32.7333	0	0	0	133	0	0	0
1965	32.75	0	0	0	133	0	0	0
1966	32.7667	2	0	0	133	0	0	0
1967	32.7833	2	0	0	133	0	0	0
1968	32.8	2	0	0	133	0	0	0
1969	32.8167	2	0	0	133	0	0	0
1970	32.8333	2	0	0	133	0	0	0
1971	32.85	2	0	0	133	0	0	0
1972	32.8667	2	0	0	133	0	0	0
1973	32.8833	2	0	0	133	0	0	0
1974	32.9	2	0	0	133	0	0	0
1975	32.9167	2	0	0	133	0	0	0
1976	32.9333	2	0	0	133	0	0	0
1977	32.95	2	0	0	133	0	0	0
1978	32.9667	2	0	0	133	0	0	0
1979	32.9833	2	0	0	133	0	0	0
1980	33	2	0	0	133	0	0	0
1981	33.0167	2	0	0	133	0	0	0
1982	33.0333	2	0	0	133	0	0	0
1983	33.05	2	0	0	133	0	0	0
1984	33.0667	0	0	0	133	0	0	0
1985	33.0833	0	0	0	133	0	0	0
1986	33.1	0	0	0	133	0	0	0
1987	33.1167	0	0	0	133	0	0	0
1988	33.1333	0	0	0	133	0	0	0
1989	33.15	0	0	0	133	0	0	0
1990	33.1667	0	0	0	133	0	0	0
1991	33.1833	0	0	0	133	0	0	0
1992	33.2	0	0	0	133	0	0	0
1993	33.2167	0	0	0	133	0	0	0
1994	33.2333	0	0	0	133	0	0	0
1995	33.25	0	0	0	133	0	0	0
1996	33.2667	0	0	0	133	0	0	0
1997	33.2833	0	0	0	133	0	0	0
1998	33.3	0	0	0	133	0	0	0
[truncated: 1,603 more rows]

## Sheet: GP09_4
Seconds	Minutes	Acanthopagrus australis	Ambassis sp	Omobranchus anolius	Omobranchus rotundiceps	Tylosurus gavialoides	Sillago ciliata	SillagoJ ciliataJ	Cryptocentroides gobioides	Favonigobius exquisitus	Redigobius macrostoma	Girella tricuspidata
0	0	0	0	0	0	0	0	0	0	0	0	0
1	0.0166667	2	150	0	0	0	0	0	0	0	0	0
2	0.0333333	2	150	0	0	0	0	0	0	0	0	0
3	0.05	2	150	0	0	0	0	0	0	0	0	0
4	0.0666667	2	150	0	0	0	0	0	0	0	0	0
5	0.0833333	2	150	0	0	0	0	0	0	0	0	0
6	0.1	2	150	0	0	0	0	0	0	0	0	0
7	0.116667	2	150	0	0	0	0	0	0	0	0	0
8	0.133333	2	150	0	0	0	0	0	0	0	0	0
9	0.15	2	150	0	0	0	0	0	0	0	0	0
10	0.166667	2	150	0	0	0	0	0	0	0	0	0
11	0.183333	0	150	0	0	0	0	0	0	0	0	0
12	0.2	0	150	0	0	0	0	0	0	0	0	0
13	0.216667	0	150	0	0	0	0	0	0	0	0	0
14	0.233333	0	150	1	0	0	0	0	0	0	0	0
15	0.25	0	150	1	0	0	0	0	0	0	0	0
16	0.266667	0	150	1	0	0	0	0	0	0	0	0
17	0.283333	0	150	1	0	0	0	0	0	0	0	0
18	0.3	0	150	1	0	0	0	0	0	0	0	0
19	0.316667	0	150	1	0	0	0	0	0	0	0	0
20	0.333333	0	150	2	0	0	0	0	0	0	0	0
21	0.35	0	150	2	0	0	0	0	0	0	0	0
22	0.366667	0	150	2	0	0	0	0	0	0	0	0
23	0.383333	0	150	2	0	0	0	0	0	0	0	0
24	0.4	0	150	2	0	0	0	0	0	0	0	0
25	0.416667	0	150	2	0	0	0	0	0	0	0	0
26	0.433333	0	150	2	0	0	0	0	0	0	0	0
27	0.45	0	150	2	0	0	0	0	0	0	0	0
28	0.466667	0	150	2	0	0	0	0	0	0	0	0
29	0.483333	0	150	2	0	0	0	0	0	0	0	0
30	0.5	0	150	1	0	0	0	0	0	0	0	0
31	0.516667	0	150	1	0	0	0	0	0	0	0	0
32	0.533333	0	150	1	0	0	0	0	0	0	0	0
33	0.55	0	150	1	0	0	0	0	0	0	0	0
34	0.566667	0	150	1	0	0	0	0	0	0	0	0
35	0.583333	0	150	1	0	0	0	0	0	0	0	0
36	0.6	0	150	1	0	0	0	0	0	0	0	0
37	0.616667	0	150	1	0	0	0	0	0	0	0	0
38	0.633333	0	150	1	0	0	0	0	0	0	0	0
39	0.65	0	150	1	0	0	0	0	0	0	0	0
40	0.666667	0	150	1	0	0	0	0	0	0	0	0
41	0.683333	0	150	1	0	0	0	0	0	0	0	0
42	0.7	0	150	1	0	0	0	0	0	0	0	0
43	0.716667	0	150	1	0	0	0	0	0	0	0	0
44	0.733333	0	150	1	0	0	0	0	0	0	0	0
45	0.75	0	150	1	0	0	0	0	0	0	0	0
46	0.766667	0	150	1	0	0	0	0	0	0	0	0
47	0.783333	0	150	1	0	0	0	0	0	0	0	0
48	0.8	0	150	1	0	0	0	0	0	0	0	0
49	0.816667	0	150	1	0	0	0	0	0	0	0	0
50	0.833333	0	150	1	0	0	0	0	0	0	0	0
51	0.85	0	150	1	0	0	0	0	0	0	0	0
52	0.866667	0	150	1	0	0	0	0	0	0	0	0
53	0.883333	0	150	1	0	0	0	0	0	0	0	0
54	0.9	0	150	1	0	0	0	0	0	0	0	0
55	0.916667	0	150	1	0	0	0	0	0	0	0	0
56	0.933333	0	150	2	0	0	0	0	0	0	0	0
57	0.95	0	150	2	0	0	0	0	0	0	0	0
58	0.966667	0	150	2	0	0	0	0	0	0	0	0
59	0.983333	0	150	2	0	0	0	0	0	0	0	0
60	1	0	150	2	0	0	0	0	0	0	0	0
61	1.01667	0	150	2	0	0	0	0	0	0	0	0
62	1.03333	0	150	2	0	0	0	0	0	0	0	0
63	1.05	0	150	3	0	0	0	0	0	0	0	0
64	1.06667	0	150	3	0	0	0	0	0	0	0	0
65	1.08333	0	150	3	0	0	0	0	0	0	0	0
66	1.1	0	150	3	0	0	0	0	0	0	0	0
67	1.11667	0	150	3	0	0	0	0	0	0	0	0
68	1.13333	0	150	3	0	0	0	0	0	0	0	0
69	1.15	0	150	3	0	0	0	0	0	0	0	0
70	1.16667	0	150	3	0	0	0	0	0	0	0	0
71	1.18333	0	150	3	0	0	0	0	0	0	0	0
72	1.2	0	150	3	0	0	0	0	0	0	0	0
73	1.21667	0	150	3	0	0	0	0	0	0	0	0
74	1.23333	0	150	3	0	0	0	0	0	0	0	0
75	1.25	0	150	3	0	0	0	0	0	0	0	0
76	1.26667	0	150	3	0	0	0	0	0	0	0	0
77	1.28333	0	150	3	0	0	0	0	0	0	0	0
78	1.3	0	150	3	0	0	0	0	0	0	0	0
79	1.31667	0	150	3	0	0	0	0	0	0	0	0
80	1.33333	0	150	3	0	0	0	0	0	0	0	0
81	1.35	0	150	3	0	0	0	0	0	0	0	0
82	1.36667	0	150	3	0	0	0	0	0	0	0	0
83	1.38333	0	150	3	0	0	0	0	0	0	0	0
84	1.4	0	150	2	0	0	0	0	0	0	0	0
85	1.41667	0	150	2	0	0	0	0	0	0	0	0
86	1.43333	0	150	2	0	0	0	0	0	0	0	0
87	1.45	0	150	2	0	0	0	0	0	0	0	0
88	1.46667	0	150	2	0	0	0	0	0	0	0	0
89	1.48333	0	150	2	0	0	0	0	0	0	0	0
90	1.5	0	150	2	0	0	0	0	0	0	0	0
91	1.51667	0	150	2	0	0	0	0	0	0	0	0
92	1.53333	0	150	2	0	0	0	0	0	0	0	0
93	1.55	0	150	1	0	0	0	0	0	0	0	0
94	1.56667	0	150	1	0	0	0	0	0	0	0	0
95	1.58333	0	150	1	0	0	0	0	0	0	0	0
96	1.6	0	150	1	0	0	0	0	0	0	0	0
97	1.61667	0	150	1	0	0	0	0	0	0	0	0
98	1.63333	0	150	1	0	0	0	0	0	0	0	0
99	1.65	0	150	1	0	0	0	0	0	0	0	0
100	1.66667	0	150	1	0	0	0	0	0	0	0	0
101	1.68333	0	150	1	0	0	0	0	0	0	0	0
102	1.7	0	150	1	0	0	0	0	0	0	0	0
103	1.71667	0	150	1	0	0	0	0	0	0	0	0
104	1.73333	0	150	1	0	0	0	0	0	0	0	0
105	1.75	0	150	1	0	0	0	0	0	0	0	0
106	1.76667	0	150	1	0	0	0	0	0	0	0	0
107	1.78333	0	150	1	0	0	0	0	0	0	0	0
108	1.8	0	150	1	0	0	0	0	0	0	0	0
109	1.81667	0	150	1	0	0	0	0	0	0	0	0
110	1.83333	0	150	1	0	0	0	0	0	0	0	0
111	1.85	0	150	1	0	0	0	0	0	0	0	0
112	1.86667	0	150	1	0	0	0	0	0	0	0	0
113	1.88333	0	150	1	0	0	0	0	0	0	0	0
114	1.9	0	150	1	0	0	0	0	0	0	0	0
115	1.91667	0	150	1	0	0	0	0	0	0	0	0
116	1.93333	0	150	1	0	0	0	0	0	0	0	0
117	1.95	0	150	1	0	0	0	0	0	0	0	0
118	1.96667	0	150	0	0	0	0	0	0	0	0	0
119	1.98333	0	150	0	0	0	0	0	0	0	0	0
120	2	0	150	0	0	0	0	0	0	0	0	0
121	2.01667	0	150	0	0	0	0	0	0	0	0	0
122	2.03333	0	150	0	0	0	0	0	0	0	0	0
123	2.05	0	150	0	0	0	0	0	0	0	0	0
124	2.06667	0	150	0	0	0	0	0	0	0	0	0
125	2.08333	0	150	0	0	0	0	0	0	0	0	0
126	2.1	0	150	0	0	0	0	0	0	0	0	0
127	2.11667	0	150	0	0	0	0	0	0	0	0	0
128	2.13333	0	150	0	0	0	0	0	0	0	0	0
129	2.15	0	150	0	0	0	0	0	0	0	0	0
130	2.16667	0	150	0	0	0	0	0	0	0	0	0
131	2.18333	0	150	5	0	0	0	0	0	0	0	0
132	2.2	0	150	5	0	0	0	0	0	0	0	0
133	2.21667	0	150	5	0	0	0	0	0	0	0	0
134	2.23333	0	150	5	0	0	0	0	0	0	0	0
135	2.25	0	150	5	0	0	0	0	0	0	0	0
136	2.26667	0	150	5	0	0	0	0	0	0	0	0
137	2.28333	0	150	5	0	0	0	0	0	0	0	0
138	2.3	0	150	5	0	0	0	0	0	0	0	0
139	2.31667	0	150	5	0	0	0	0	0	0	0	0
140	2.33333	0	150	5	0	0	0	0	0	0	0	0
141	2.35	0	150	5	0	0	0	0	0	0	0	0
142	2.36667	0	150	5	0	0	0	0	0	0	0	0
143	2.38333	0	150	5	0	0	0	0	0	0	0	0
144	2.4	0	150	5	0	0	0	0	0	0	0	0
145	2.41667	0	150	5	0	0	0	0	0	0	0	0
146	2.43333	0	150	5	0	0	0	0	0	0	0	0
147	2.45	0	150	5	0	0	0	0	0	0	0	0
148	2.46667	0	150	0	0	0	0	0	0	0	0	0
149	2.48333	0	150	1	0	0	0	0	0	0	0	0
150	2.5	0	150	1	0	0	0	0	0	0	0	0
151	2.51667	0	150	1	0	0	0	0	0	0	0	0
152	2.53333	0	150	0	0	0	0	0	0	0	0	0
153	2.55	0	150	0	0	0	0	0	0	0	0	0
154	2.56667	0	150	0	0	0	0	0	0	0	0	0
155	2.58333	0	150	0	0	0	0	0	0	0	0	0
156	2.6	0	150	0	0	0	0	0	0	0	0	0
157	2.61667	0	150	0	0	0	0	0	0	0	0	0
158	2.63333	0	150	0	0	0	0	0	0	0	0	0
159	2.65	0	150	0	0	0	0	0	0	0	0	0
160	2.66667	0	150	0	0	0	0	0	0	0	0	0
161	2.68333	0	150	0	0	0	0	0	0	0	0	0
162	2.7	0	150	0	0	0	0	0	0	0	0	0
163	2.71667	0	150	0	0	0	0	0	0	0	0	0
164	2.73333	0	150	0	0	0	0	0	0	0	0	0
165	2.75	0	150	0	0	0	0	0	0	0	0	0
166	2.76667	0	150	0	0	0	0	0	0	0	0	0
167	2.78333	0	150	0	0	0	0	0	0	0	0	0
168	2.8	0	150	0	0	0	0	0	0	0	0	0
169	2.81667	0	150	0	0	0	0	0	0	0	0	0
170	2.83333	1	150	0	0	0	0	0	0	0	0	0
171	2.85	1	150	0	0	0	0	0	0	0	0	0
172	2.86667	1	150	0	0	0	0	0	0	0	0	0
173	2.88333	0	150	0	0	0	0	0	0	0	0	0
174	2.9	0	150	0	0	0	0	0	0	0	0	0
175	2.91667	0	150	0	0	0	0	0	0	0	0	0
176	2.93333	0	150	0	0	0	0	0	0	0	0	0
177	2.95	0	150	0	0	0	0	0	0	0	0	0
178	2.96667	0	150	0	0	0	0	0	0	0	0	0
179	2.98333	0	150	0	0	0	0	0	0	0	0	0
180	3	0	150	0	0	0	0	0	0	0	0	0
181	3.01667	0	150	0	0	0	0	0	0	0	0	0
182	3.03333	0	150	1	0	0	0	0	0	0	0	0
183	3.05	0	150	1	0	0	0	0	0	0	0	0
184	3.06667	0	150	1	0	0	0	0	0	0	0	0
185	3.08333	0	150	1	0	0	0	0	0	0	0	0
186	3.1	0	150	1	0	0	0	0	0	0	0	0
187	3.11667	0	150	1	0	0	0	0	0	0	0	0
188	3.13333	0	150	1	0	0	0	0	0	0	0	0
189	3.15	0	150	1	0	0	0	0	0	0	0	0
190	3.16667	0	150	1	0	0	0	0	0	0	0	0
191	3.18333	0	150	3	0	0	0	0	0	0	0	0
192	3.2	0	150	3	0	0	0	0	0	0	0	0
193	3.21667	0	150	3	0	0	0	0	0	0	0	0
194	3.23333	0	150	3	0	0	0	0	0	0	0	0
195	3.25	0	150	3	0	0	0	0	0	0	0	0
196	3.26667	0	150	3	0	0	0	0	0	0	0	0
197	3.28333	0	150	3	0	0	0	0	0	0	0	0
198	3.3	0	150	3	0	0	0	0	0	0	0	0
199	3.31667	0	150	3	0	0	0	0	0	0	0	0
200	3.33333	0	150	3	0	0	0	0	0	0	0	0
201	3.35	0	150	2	0	0	0	0	0	0	0	0
202	3.36667	0	150	2	0	0	0	0	0	0	0	0
203	3.38333	0	150	1	0	0	0	0	0	0	0	0
204	3.4	0	150	1	0	0	0	0	0	0	0	0
205	3.41667	0	150	1	0	0	0	0	0	0	0	0
206	3.43333	0	150	1	0	0	0	0	0	0	0	0
207	3.45	0	150	1	0	0	0	0	0	0	0	0
208	3.46667	0	150	1	0	0	0	0	0	0	0	0
209	3.48333	0	150	1	0	0	0	0	0	0	0	0
210	3.5	0	150	1	0	0	0	0	0	0	0	0
211	3.51667	0	150	1	0	0	0	0	0	0	0	0
212	3.53333	0	150	0	0	0	0	0	0	0	0	0
213	3.55	0	150	0	0	0	0	0	0	0	0	0
214	3.56667	0	150	0	0	0	0	0	0	0	0	0
215	3.58333	2	150	0	0	0	0	0	0	0	0	0
216	3.6	2	150	0	0	0	0	0	0	0	0	0
217	3.61667	2	150	0	0	0	0	0	0	0	0	0
218	3.63333	2	150	0	0	0	0	0	0	0	0	0
219	3.65	2	150	0	0	0	0	0	0	0	0	0
220	3.66667	2	150	0	0	0	0	0	0	0	0	0
221	3.68333	2	150	1	0	0	0	0	0	0	0	0
222	3.7	2	150	1	0	0	0	0	0	0	0	0
223	3.71667	2	150	1	0	0	0	0	0	0	0	0
224	3.73333	2	150	1	0	0	0	0	0	0	0	0
225	3.75	2	150	1	0	0	0	0	0	0	0	0
226	3.76667	2	150	1	0	0	0	0	0	0	0	0
227	3.78333	2	150	1	0	0	0	0	0	0	0	0
228	3.8	2	150	1	0	0	0	0	0	0	0	0
229	3.81667	2	150	1	0	0	0	0	0	0	0	0
230	3.83333	2	150	1	0	0	0	0	0	0	0	0
231	3.85	2	150	0	0	0	0	0	0	0	0	0
232	3.86667	2	150	0	0	0	0	0	0	0	0	0
233	3.88333	0	150	0	0	0	0	0	0	0	0	0
234	3.9	0	150	0	0	0	0	0	0	0	0	0
235	3.91667	0	150	0	0	0	0	0	0	0	0	0
236	3.93333	0	150	0	0	0	0	0	0	0	0	0
237	3.95	0	150	0	0	0	0	0	0	0	0	0
238	3.96667	0	150	0	0	0	0	0	0	0	0	0
239	3.98333	0	150	0	0	0	0	0	0	0	0	0
240	4	0	150	0	0	0	0	0	0	0	0	0
241	4.01667	0	150	0	0	0	0	0	0	0	0	0
242	4.03333	0	150	0	0	0	0	0	0	0	0	0
243	4.05	0	150	0	0	0	0	0	0	0	0	0
244	4.06667	0	150	0	0	0	0	0	0	0	0	0
245	4.08333	0	150	0	0	0	0	0	0	0	0	0
246	4.1	0	150	0	0	0	0	0	0	0	0	0
247	4.11667	0	150	0	0	0	0	0	0	0	0	0
248	4.13333	0	150	0	0	0	0	0	0	0	0	0
249	4.15	0	150	0	0	0	0	0	0	0	0	0
250	4.16667	0	150	0	0	0	0	0	0	0	0	0
251	4.18333	0	150	0	0	0	0	0	0	0	0	0
252	4.2	0	150	0	0	0	0	0	0	0	0	0
253	4.21667	0	150	0	0	0	0	0	0	0	0	0
254	4.23333	0	150	0	0	0	0	0	0	0	0	0
255	4.25	0	150	0	0	0	0	0	0	0	0	0
256	4.26667	1	150	1	0	0	0	0	0	0	0	0
257	4.28333	1	150	1	0	0	0	0	0	0	0	0
258	4.3	1	150	0	0	0	0	0	0	0	0	0
259	4.31667	1	150	0	0	0	0	0	0	0	0	0
260	4.33333	1	150	0	0	0	0	0	0	0	0	0
261	4.35	1	150	0	0	0	0	0	0	0	0	0
262	4.36667	1	150	0	0	0	0	0	0	0	0	0
263	4.38333	1	150	0	0	0	0	0	0	0	0	0
264	4.4	1	150	0	0	0	0	0	0	0	0	0
265	4.41667	1	150	0	0	0	0	0	0	0	0	0
266	4.43333	0	150	0	0	0	0	0	0	0	0	0
267	4.45	0	150	0	0	0	0	0	0	0	0	0
268	4.46667	0	150	0	0	0	0	0	0	0	0	0
269	4.48333	0	150	0	0	0	0	0	0	0	0	0
270	4.5	0	150	0	0	0	0	0	0	0	0	0
271	4.51667	0	150	0	0	0	0	0	0	0	0	0
272	4.53333	0	150	0	0	0	0	0	0	0	0	0
273	4.55	1	150	0	0	0	0	0	0	0	0	0
274	4.56667	1	150	0	0	0	0	0	0	0	0	0
275	4.58333	1	150	0	0	0	0	0	0	0	0	0
276	4.6	1	150	0	0	0	0	0	0	0	0	0
277	4.61667	1	150	0	0	0	0	0	0	0	0	0
278	4.63333	1	150	0	0	0	0	0	0	0	0	0
279	4.65	1	150	0	0	0	0	0	0	0	0	0
280	4.66667	1	150	0	0	0	0	0	0	0	0	0
281	4.68333	1	150	1	0	0	0	0	0	0	0	0
282	4.7	1	150	1	0	0	0	0	0	0	0	0
283	4.71667	1	150	1	0	0	0	0	0	0	0	0
284	4.73333	1	150	1	0	0	0	0	0	0	0	0
285	4.75	1	150	1	0	0	0	0	0	0	0	0
286	4.76667	1	150	1	0	0	0	0	0	0	0	0
287	4.78333	1	150	1	0	0	0	0	0	0	0	0
288	4.8	0	150	1	0	0	0	0	0	0	0	0
289	4.81667	0	150	1	0	0	0	0	0	0	0	0
290	4.83333	0	150	2	0	0	0	0	0	0	0	0
291	4.85	0	150	2	0	0	0	0	0	0	0	0
292	4.86667	0	150	2	0	0	0	0	0	0	0	0
293	4.88333	0	150	2	0	0	0	0	0	0	0	0
294	4.9	0	150	2	0	0	0	0	0	0	0	0
295	4.91667	0	150	2	0	0	0	0	0	0	0	0
296	4.93333	0	150	1	0	0	0	0	0	0	0	0
297	4.95	0	150	1	0	0	0	0	0	0	0	0
298	4.96667	0	150	1	0	0	0	0	0	0	0	0
299	4.98333	0	150	1	0	0	0	0	0	0	0	0
300	5	0	150	1	0	0	0	0	0	0	0	0
301	5.01667	0	150	1	0	0	0	0	0	0	0	0
302	5.03333	0	150	1	0	0	0	0	0	0	0	0
303	5.05	0	150	1	0	0	0	0	0	0	0	0
304	5.06667	0	150	1	0	0	0	0	0	0	0	0
305	5.08333	0	150	1	0	0	0	0	0	0	0	0
306	5.1	0	150	1	0	0	0	0	0	0	0	0
307	5.11667	0	150	1	0	0	0	0	0	0	0	0
308	5.13333	0	150	1	0	0	0	0	0	0	0	0
309	5.15	0	150	1	0	0	0	0	0	0	0	0
310	5.16667	0	150	1	0	0	0	0	0	0	0	0
311	5.18333	0	150	1	0	0	0	0	0	0	0	0
312	5.2	0	150	1	0	0	0	0	0	0	0	0
313	5.21667	0	150	1	0	0	0	0	0	0	0	0
314	5.23333	0	150	1	0	0	0	0	0	0	0	0
315	5.25	0	150	1	0	0	0	0	0	0	0	0
316	5.26667	0	150	1	0	0	0	0	0	0	0	0
317	5.28333	0	150	1	0	0	0	0	0	0	0	0
318	5.3	0	150	1	0	0	0	0	0	0	0	0
319	5.31667	0	150	1	0	0	0	0	0	0	0	0
320	5.33333	0	150	2	0	0	0	0	0	0	0	0
321	5.35	0	150	2	0	0	0	0	0	0	0	0
322	5.36667	0	150	2	0	0	0	0	0	0	0	0
323	5.38333	0	150	2	0	0	0	0	0	0	0	0
324	5.4	0	150	2	0	0	0	0	0	0	0	0
325	5.41667	0	150	2	0	0	0	0	0	0	0	0
326	5.43333	0	150	2	0	0	0	0	0	0	0	0
327	5.45	0	150	1	0	0	0	0	0	0	0	0
328	5.46667	0	150	1	0	0	0	0	0	0	0	0
329	5.48333	0	150	1	0	0	0	0	0	0	0	0
330	5.5	0	150	1	0	0	0	0	0	0	0	0
331	5.51667	0	150	1	0	0	0	0	0	0	0	0
332	5.53333	0	150	1	0	0	0	0	0	0	0	0
333	5.55	0	150	1	0	0	0	0	0	0	0	0
334	5.56667	0	150	1	0	0	0	0	0	0	0	0
335	5.58333	0	150	1	0	0	0	0	0	0	0	0
336	5.6	0	150	1	0	0	0	0	0	0	0	0
337	5.61667	0	150	1	0	0	0	0	0	0	0	0
338	5.63333	0	150	1	0	0	0	0	0	0	0	0
339	5.65	0	150	1	0	0	0	0	0	0	0	0
340	5.66667	0	150	1	0	0	0	0	0	0	0	0
341	5.68333	0	150	1	0	0	0	0	0	0	0	0
342	5.7	0	150	1	0	0	0	0	0	0	0	0
343	5.71667	0	150	1	0	0	0	0	0	0	0	0
344	5.73333	0	150	1	0	0	0	0	0	0	0	0
345	5.75	0	150	1	0	0	0	0	0	0	0	0
346	5.76667	0	150	1	0	0	0	0	0	0	0	0
347	5.78333	0	150	1	0	0	0	0	0	0	0	0
348	5.8	0	150	1	0	0	0	0	0	0	0	0
349	5.81667	0	150	1	0	0	0	0	0	0	0	0
350	5.83333	0	150	1	0	0	0	0	0	0	0	0
351	5.85	0	150	1	0	0	0	0	0	0	0	0
352	5.86667	0	150	1	0	0	0	0	0	0	0	0
353	5.88333	0	150	1	0	0	0	0	0	0	0	0
354	5.9	0	150	1	0	0	0	0	0	0	0	0
355	5.91667	0	150	1	0	0	0	0	0	0	0	0
356	5.93333	0	150	1	0	0	0	0	0	0	0	0
357	5.95	0	150	1	0	0	0	0	0	0	0	0
358	5.96667	0	150	1	0	0	0	0	0	0	0	0
359	5.98333	0	150	1	0	0	0	0	0	0	0	0
360	6	0	150	1	0	0	0	0	0	0	0	0
361	6.01667	0	150	1	0	0	0	0	0	0	0	0
362	6.03333	0	150	1	0	0	0	0	0	0	0	0
363	6.05	0	150	1	0	0	0	0	0	0	0	0
364	6.06667	0	150	1	0	0	0	0	0	0	0	0
365	6.08333	0	150	1	0	0	0	0	0	0	0	0
366	6.1	0	150	1	0	0	0	0	0	0	0	0
367	6.11667	0	150	1	0	0	0	0	0	0	0	0
368	6.13333	0	150	1	0	0	0	0	0	0	0	0
369	6.15	0	150	1	0	0	0	0	0	0	0	0
370	6.16667	0	150	1	0	0	0	0	0	0	0	0
371	6.18333	0	150	1	0	0	0	0	0	0	0	0
372	6.2	0	150	1	0	0	0	0	0	0	0	0
373	6.21667	0	150	1	0	0	0	0	0	0	0	0
374	6.23333	0	150	1	0	0	0	0	0	0	0	0
375	6.25	0	150	1	0	0	0	0	0	0	0	0
376	6.26667	0	150	1	0	0	0	0	0	0	0	0
377	6.28333	0	150	1	0	0	0	0	0	0	0	0
378	6.3	0	150	1	0	0	0	0	0	0	0	0
379	6.31667	0	150	1	0	0	0	0	0	0	0	0
380	6.33333	0	150	1	0	0	0	0	0	0	0	0
381	6.35	0	150	1	0	0	0	0	0	0	0	0
382	6.36667	0	150	1	0	0	0	0	0	0	0	0
383	6.38333	0	150	1	0	0	0	0	0	0	0	0
384	6.4	0	150	1	0	0	0	0	0	0	0	0
385	6.41667	0	150	1	0	0	0	0	0	0	0	0
386	6.43333	0	150	1	0	0	0	0	0	0	0	0
387	6.45	0	150	1	0	0	0	0	0	0	0	0
388	6.46667	0	150	2	0	0	0	0	0	0	0	0
389	6.48333	0	150	2	0	0	0	0	0	0	0	0
390	6.5	0	150	2	0	0	0	0	0	0	0	0
391	6.51667	0	150	2	0	0	0	0	0	0	0	0
392	6.53333	0	150	3	0	0	0	0	0	0	0	0
393	6.55	0	150	3	0	0	0	0	0	0	0	0
394	6.56667	0	150	3	0	0	0	0	0	0	0	0
395	6.58333	0	150	3	0	0	0	0	0	0	0	0
396	6.6	0	150	3	0	0	0	0	0	0	0	0
397	6.61667	0	150	2	0	0	0	0	0	0	0	0
398	6.63333	0	150	2	0	0	0	0	0	0	0	0
399	6.65	0	150	2	0	0	0	0	0	0	0	0
400	6.66667	0	150	1	0	0	0	0	0	0	0	0
401	6.68333	0	150	1	0	0	0	0	0	0	0	0
402	6.7	0	150	1	0	0	0	0	0	0	0	0
403	6.71667	0	150	1	0	0	0	0	0	0	0	0
404	6.73333	0	150	1	0	0	0	0	0	0	0	0
405	6.75	0	150	1	0	0	0	0	0	0	0	0
406	6.76667	0	150	1	0	0	0	0	0	0	0	0
407	6.78333	0	150	1	0	0	0	0	0	0	0	0
408	6.8	0	150	1	0	0	0	0	0	0	0	0
409	6.81667	0	150	1	0	0	0	0	0	0	0	0
410	6.83333	0	150	1	0	0	0	0	0	0	0	0
411	6.85	0	150	1	0	0	0	0	0	0	0	0
412	6.86667	0	150	1	0	0	0	0	0	0	0	0
413	6.88333	0	150	1	0	0	0	0	0	0	0	0
414	6.9	0	150	1	0	0	0	0	0	0	0	0
415	6.91667	0	150	1	0	0	0	0	0	0	0	0
416	6.93333	0	150	1	0	0	0	0	0	0	0	0
417	6.95	0	150	1	0	0	0	0	0	0	0	0
418	6.96667	0	150	1	0	0	0	0	0	0	0	0
419	6.98333	0	150	2	0	0	0	0	0	0	0	0
420	7	0	150	2	0	0	0	0	0	0	0	0
421	7.01667	1	150	2	0	0	0	0	0	0	0	0
422	7.03333	1	150	2	0	0	0	0	0	0	0	0
423	7.05	1	150	2	0	0	0	0	0	0	0	0
424	7.06667	0	150	2	0	0	0	0	0	0	0	0
425	7.08333	0	150	2	0	0	0	0	0	0	0	0
426	7.1	0	150	2	0	0	0	0	0	0	0	0
427	7.11667	0	150	2	0	0	0	0	0	0	0	0
428	7.13333	0	150	2	0	0	0	0	0	0	0	0
429	7.15	0	150	2	0	0	0	0	0	0	0	0
430	7.16667	0	150	2	0	0	0	0	0	0	0	0
431	7.18333	0	150	2	0	0	0	0	0	0	0	0
432	7.2	0	150	2	0	0	0	0	0	0	0	0
433	7.21667	0	150	2	0	0	0	0	0	0	0	0
434	7.23333	0	150	2	0	0	0	0	0	0	0	0
435	7.25	0	150	2	0	0	0	0	0	0	0	0
436	7.26667	0	150	2	0	0	0	0	0	0	0	0
437	7.28333	0	150	2	0	0	0	0	0	0	0	0
438	7.3	0	150	2	0	0	0	0	0	0	0	0
439	7.31667	0	150	2	0	0	0	0	0	0	0	0
440	7.33333	0	150	2	0	0	0	0	0	0	0	0
441	7.35	0	150	2	0	0	0	0	0	0	0	0
442	7.36667	0	150	2	0	0	0	0	0	0	0	0
443	7.38333	0	150	2	0	0	0	0	0	0	0	0
444	7.4	0	150	2	0	0	0	0	0	0	0	0
445	7.41667	0	150	2	0	0	0	0	0	0	0	0
446	7.43333	0	150	2	0	0	0	0	0	0	0	0
447	7.45	0	150	2	0	0	0	0	0	0	0	0
448	7.46667	0	150	2	0	0	0	0	0	0	0	0
449	7.48333	0	150	2	0	0	0	0	0	0	0	0
450	7.5	0	150	2	0	0	0	0	0	0	0	0
451	7.51667	0	150	2	0	0	0	0	0	0	0	0
452	7.53333	0	150	2	0	0	0	0	0	0	0	0
453	7.55	0	150	2	0	0	0	0	0	0	0	0
454	7.56667	0	150	2	0	0	0	0	0	0	0	0
455	7.58333	0	150	2	0	0	0	0	0	0	0	0
456	7.6	0	150	2	0	0	0	0	0	0	0	0
457	7.61667	0	150	2	0	0	0	0	0	0	0	0
458	7.63333	0	150	2	0	0	0	0	0	0	0	0
459	7.65	0	150	2	0	0	0	0	0	0	0	0
460	7.66667	0	150	2	0	0	0	0	0	0	0	0
461	7.68333	0	150	2	0	0	0	0	0	0	0	0
462	7.7	0	150	2	0	0	0	0	0	0	0	0
463	7.71667	0	150	2	0	0	0	0	0	0	0	0
464	7.73333	0	150	2	0	0	0	0	0	0	0	0
465	7.75	0	150	2	0	0	0	0	0	0	0	0
466	7.76667	0	150	2	0	0	0	0	0	0	0	0
467	7.78333	0	150	2	0	0	0	0	0	0	0	0
468	7.8	0	150	2	0	0	0	0	0	0	0	0
469	7.81667	0	150	2	0	0	0	0	0	0	0	0
470	7.83333	0	150	2	0	0	0	0	0	0	0	0
471	7.85	0	150	2	0	0	0	0	0	0	0	0
472	7.86667	0	150	2	0	0	0	0	0	0	0	0
473	7.88333	0	150	2	0	0	0	0	0	0	0	0
474	7.9	0	150	2	0	0	0	0	0	0	0	0
475	7.91667	0	150	2	0	0	0	0	0	0	0	0
476	7.93333	0	150	2	0	0	0	0	0	0	0	0
477	7.95	0	150	2	0	0	0	0	0	0	0	0
478	7.96667	0	150	1	0	0	0	0	0	0	0	0
479	7.98333	0	150	1	0	0	0	0	0	0	0	0
480	8	0	150	1	0	0	0	0	0	0	0	0
481	8.01667	0	150	1	0	0	0	0	0	0	0	0
482	8.03333	0	150	1	0	0	0	0	0	0	0	0
483	8.05	0	150	1	0	0	0	0	0	0	0	0
484	8.06667	0	150	1	0	0	0	0	0	0	0	0
485	8.08333	0	150	1	0	0	0	0	0	0	0	0
486	8.1	0	150	1	0	0	0	0	0	0	0	0
487	8.11667	0	150	1	0	0	0	0	0	0	0	0
488	8.13333	0	150	1	1	0	0	0	0	0	0	0
489	8.15	1	150	1	1	0	0	0	0	0	0	0
490	8.16667	1	150	1	1	0	0	0	0	0	0	0
491	8.18333	1	150	1	1	0	0	0	0	0	0	0
492	8.2	1	150	0	1	0	0	0	0	0	0	0
493	8.21667	1	150	0	1	0	0	0	0	0	0	0
494	8.23333	1	150	0	1	0	0	0	0	0	0	0
495	8.25	1	150	0	1	0	0	0	0	0	0	0
496	8.26667	1	150	0	1	0	0	0	0	0	0	0
497	8.28333	1	150	0	1	0	0	0	0	0	0	0
498	8.3	1	150	0	1	0	0	0	0	0	0	0
499	8.31667	1	150	0	1	0	0	0	0	0	0	0
500	8.33333	0	150	0	1	0	0	0	0	0	0	0
501	8.35	0	150	0	1	0	0	0	0	0	0	0
502	8.36667	0	150	0	0	0	0	0	0	0	0	0
503	8.38333	0	150	0	0	0	0	0	0	0	0	0
504	8.4	0	150	0	0	0	0	0	0	0	0	0
505	8.41667	0	150	0	0	0	0	0	0	0	0	0
506	8.43333	0	150	0	0	0	0	0	0	0	0	0
507	8.45	0	150	0	0	0	0	0	0	0	0	0
508	8.46667	0	150	0	0	0	0	0	0	0	0	0
509	8.48333	0	150	0	0	0	0	0	0	0	0	0
510	8.5	0	150	0	0	0	0	0	0	0	0	0
511	8.51667	0	150	0	0	0	0	0	0	0	0	0
512	8.53333	0	150	0	0	0	0	0	0	0	0	0
513	8.55	0	150	0	0	0	0	0	0	0	0	0
514	8.56667	0	150	0	0	0	0	0	0	0	0	0
515	8.58333	0	150	0	0	0	0	0	0	0	0	0
516	8.6	0	150	0	0	0	0	0	0	0	0	0
517	8.61667	0	150	0	0	0	0	0	0	0	0	0
518	8.63333	0	150	0	0	0	0	0	0	0	0	0
519	8.65	0	150	0	0	0	0	0	0	0	0	0
520	8.66667	0	150	0	0	0	0	0	0	0	0	0
521	8.68333	0	150	0	0	0	0	0	0	0	0	0
522	8.7	0	150	0	0	0	0	0	0	0	0	0
523	8.71667	0	150	0	0	0	0	0	0	0	0	0
524	8.73333	0	150	0	0	0	0	0	0	0	0	0
525	8.75	0	150	0	0	0	0	0	0	0	0	0
526	8.76667	0	150	0	0	0	0	0	0	0	0	0
527	8.78333	0	150	0	0	0	0	0	0	0	0	0
528	8.8	0	150	0	0	0	0	0	0	0	0	0
529	8.81667	0	150	0	0	0	0	0	0	0	0	0
530	8.83333	0	150	0	0	0	0	0	0	0	0	0
531	8.85	0	150	0	0	0	0	0	0	0	0	0
532	8.86667	0	150	0	0	0	0	0	0	0	0	0
533	8.88333	0	150	0	0	0	0	0	0	0	0	0
534	8.9	0	150	0	0	0	0	0	0	0	0	0
535	8.91667	0	150	0	0	0	0	0	0	0	0	0
536	8.93333	0	150	0	0	1	0	0	0	0	0	0
537	8.95	0	150	0	0	1	0	0	0	0	0	0
538	8.96667	0	150	0	0	1	0	0	0	0	0	0
539	8.98333	0	150	0	0	0	0	0	0	0	0	0
540	9	0	150	0	0	0	0	0	0	0	0	0
541	9.01667	0	150	0	0	0	0	0	0	0	0	0
542	9.03333	0	150	0	0	0	0	0	0	0	0	0
543	9.05	0	150	0	0	0	0	0	0	0	0	0
544	9.06667	0	150	0	0	0	0	0	0	0	0	0
545	9.08333	0	150	0	0	0	0	0	0	0	0	0
546	9.1	0	150	0	0	0	0	0	0	0	0	0
547	9.11667	0	150	0	0	0	0	0	0	0	0	0
548	9.13333	0	150	0	0	0	0	0	0	0	0	0
549	9.15	0	150	0	0	0	0	0	0	0	0	0
550	9.16667	0	150	0	0	0	0	0	0	0	0	0
551	9.18333	1	150	2	0	0	0	0	0	0	0	0
552	9.2	1	150	2	0	0	0	0	0	0	0	0
553	9.21667	1	150	2	0	0	0	0	0	0	0	0
554	9.23333	1	150	2	0	0	0	0	0	0	0	0
555	9.25	1	150	0	0	0	0	0	0	0	0	0
556	9.26667	0	150	0	0	0	0	0	0	0	0	0
557	9.28333	0	150	1	0	0	0	0	0	0	0	0
558	9.3	0	150	1	0	0	0	0	0	0	0	0
559	9.31667	0	150	0	0	0	0	0	0	0	0	0
560	9.33333	0	150	0	0	0	0	0	0	0	0	0
561	9.35	0	150	0	0	0	0	0	0	0	0	0
562	9.36667	0	150	0	0	0	0	0	0	0	0	0
563	9.38333	1	150	1	0	0	0	0	0	0	0	0
564	9.4	1	150	1	0	0	0	0	0	0	0	0
565	9.41667	1	150	1	0	0	0	0	0	0	0	0
566	9.43333	1	150	0	0	0	0	0	0	0	0	0
567	9.45	1	150	0	0	0	0	0	0	0	0	0
568	9.46667	1	150	0	0	0	0	0	0	0	0	0
569	9.48333	0	150	0	0	0	0	0	0	0	0	0
570	9.5	0	150	0	0	0	0	0	0	0	0	0
571	9.51667	0	150	0	0	0	0	0	0	0	0	0
572	9.53333	0	150	0	0	0	0	0	0	0	0	0
573	9.55	0	150	0	0	0	0	0	0	0	0	0
574	9.56667	0	150	0	0	0	0	0	0	0	0	0
575	9.58333	0	150	0	0	0	0	0	0	0	0	0
576	9.6	0	150	0	0	0	0	0	0	0	0	0
577	9.61667	0	150	0	0	0	0	0	0	0	0	0
578	9.63333	0	150	0	0	0	0	0	0	0	0	0
579	9.65	0	150	0	0	0	0	0	0	0	0	0
580	9.66667	0	150	0	0	0	0	0	0	0	0	0
581	9.68333	0	150	0	0	0	0	0	0	0	0	0
582	9.7	0	150	0	0	0	0	0	0	0	0	0
583	9.71667	0	150	0	0	0	0	0	0	0	0	0
584	9.73333	0	150	0	0	0	0	0	0	0	0	0
585	9.75	0	150	1	0	0	0	0	0	0	0	0
586	9.76667	0	150	1	0	0	0	0	0	0	0	0
587	9.78333	0	150	1	0	0	0	0	0	0	0	0
588	9.8	0	150	1	0	0	0	0	0	0	0	0
589	9.81667	0	150	1	0	0	0	0	0	0	0	0
590	9.83333	0	150	1	0	0	0	0	0	0	0	0
591	9.85	0	150	1	0	0	0	0	0	0	0	0
592	9.86667	0	150	1	0	0	0	0	0	0	0	0
593	9.88333	0	150	1	0	0	0	0	0	0	0	0
594	9.9	0	150	1	0	0	0	0	0	0	0	0
595	9.91667	0	150	1	0	0	0	0	0	0	0	0
596	9.93333	0	150	1	0	0	0	0	0	0	0	0
597	9.95	0	150	1	0	0	0	0	0	0	0	0
598	9.96667	0	150	1	0	0	0	0	0	0	0	0
599	9.98333	0	150	1	0	0	0	0	0	0	0	0
600	10	0	150	1	0	0	0	0	0	0	0	0
601	10.0167	0	150	1	0	0	0	0	0	0	0	0
602	10.0333	0	150	1	0	0	0	0	0	0	0	0
603	10.05	0	150	1	0	0	0	0	0	0	0	0
604	10.0667	0	150	1	0	0	0	0	0	0	0	0
605	10.0833	0	150	1	0	0	0	0	0	0	0	0
606	10.1	0	150	1	0	0	0	0	0	0	0	0
607	10.1167	0	150	1	0	0	0	0	0	0	0	0
608	10.1333	0	150	1	0	0	0	0	0	0	0	0
609	10.15	0	150	1	0	0	0	0	0	0	0	0
610	10.1667	0	150	1	0	0	0	0	0	0	0	0
611	10.1833	0	150	1	0	0	0	0	0	0	0	0
612	10.2	0	150	1	0	0	0	0	0	0	0	0
613	10.2167	0	150	1	0	0	0	0	0	0	0	0
614	10.2333	0	150	1	0	0	0	0	0	0	0	0
615	10.25	0	150	1	0	0	0	0	0	0	0	0
616	10.2667	0	150	1	0	0	0	0	0	0	0	0
617	10.2833	0	150	2	0	0	0	0	0	0	0	0
618	10.3	0	150	2	0	0	0	0	0	0	0	0
619	10.3167	0	150	1	0	0	0	0	0	0	0	0
620	10.3333	0	150	2	0	0	0	0	0	0	0	0
621	10.35	0	150	2	0	0	0	0	0	0	0	0
622	10.3667	0	150	2	0	0	0	0	0	0	0	0
623	10.3833	0	150	2	0	0	0	0	0	0	0	0
624	10.4	0	150	2	0	0	0	0	0	0	0	0
625	10.4167	0	150	2	0	0	0	0	0	0	0	0
626	10.4333	0	150	2	0	0	0	0	0	0	0	0
627	10.45	0	150	2	0	0	0	0	0	0	0	0
628	10.4667	0	150	2	0	0	0	0	0	0	0	0
629	10.4833	0	150	2	0	0	0	0	0	0	0	0
630	10.5	0	150	2	0	0	0	0	0	0	0	0
631	10.5167	0	150	2	0	0	0	0	0	0	0	0
632	10.5333	0	150	2	0	0	0	0	0	0	0	0
633	10.55	0	150	2	0	0	0	0	0	0	0	0
634	10.5667	0	150	2	0	0	0	0	0	0	0	0
635	10.5833	0	150	2	0	0	0	0	0	0	0	0
636	10.6	0	150	2	0	0	0	0	0	0	0	0
637	10.6167	0	150	2	0	0	0	0	0	0	0	0
638	10.6333	0	150	2	0	0	0	0	0	0	0	0
639	10.65	0	150	2	0	0	0	0	0	0	0	0
640	10.6667	0	150	2	0	0	0	0	0	0	0	0
641	10.6833	0	150	2	0	0	0	0	0	0	0	0
642	10.7	0	150	2	0	0	0	0	0	0	0	0
643	10.7167	0	150	2	0	0	0	0	0	0	0	0
644	10.7333	0	150	2	0	0	0	0	0	0	0	0
645	10.75	0	150	1	0	0	0	0	0	0	0	0
646	10.7667	0	150	1	0	0	0	0	0	0	0	0
647	10.7833	0	150	1	0	0	0	0	0	0	0	0
648	10.8	0	150	1	0	0	0	0	0	0	0	0
649	10.8167	0	150	1	0	0	0	0	0	0	0	0
650	10.8333	0	150	1	0	0	0	0	0	0	0	0
651	10.85	0	150	1	0	0	0	0	0	0	0	0
652	10.8667	0	150	1	0	0	0	0	0	0	0	0
653	10.8833	0	150	1	0	0	0	0	0	0	0	0
654	10.9	0	150	1	0	0	0	0	0	0	0	0
655	10.9167	0	150	1	0	0	0	0	0	0	0	0
656	10.9333	0	150	1	0	0	0	0	0	0	0	0
657	10.95	0	150	1	0	0	0	0	0	0	0	0
658	10.9667	0	150	1	0	0	0	0	0	0	0	0
659	10.9833	0	150	1	0	0	0	0	0	0	0	0
660	11	0	150	1	0	0	0	0	0	0	0	0
661	11.0167	0	150	1	0	0	0	0	0	0	0	0
662	11.0333	0	150	1	0	0	0	0	0	0	0	0
663	11.05	0	150	1	0	0	0	0	0	0	0	0
664	11.0667	0	150	1	0	0	0	0	0	0	0	0
665	11.0833	0	150	1	0	0	0	0	0	0	0	0
666	11.1	0	150	1	0	0	0	0	0	0	0	0
667	11.1167	0	150	1	0	0	0	0	0	0	0	0
668	11.1333	0	150	1	0	0	0	0	0	0	0	0
669	11.15	0	150	1	0	0	0	0	0	0	0	0
670	11.1667	0	150	1	0	0	0	0	0	0	0	0
671	11.1833	0	150	1	0	0	0	0	0	0	0	0
672	11.2	0	150	1	0	0	0	0	0	0	0	0
673	11.2167	0	150	1	0	0	0	0	0	0	0	0
674	11.2333	0	150	1	0	0	0	0	0	0	0	0
675	11.25	0	150	1	0	0	0	0	0	0	0	0
676	11.2667	0	150	1	0	0	0	0	0	0	0	0
677	11.2833	0	150	1	0	0	0	0	0	0	0	0
678	11.3	0	150	1	0	0	0	0	0	0	0	0
679	11.3167	0	150	1	0	0	0	0	0	0	0	0
680	11.3333	0	150	1	0	0	0	0	0	0	0	0
681	11.35	0	150	1	0	0	0	0	0	0	0	0
682	11.3667	0	150	1	0	0	0	0	0	0	0	0
683	11.3833	0	150	1	0	0	0	0	0	0	0	0
684	11.4	0	150	1	0	0	0	0	0	0	0	0
685	11.4167	0	150	1	0	0	0	0	0	0	0	0
686	11.4333	0	150	1	0	0	0	0	0	0	0	0
687	11.45	0	150	1	0	0	0	0	0	0	0	0
688	11.4667	0	150	1	0	0	0	0	0	0	0	0
689	11.4833	0	150	1	0	0	0	0	0	0	0	0
690	11.5	0	150	1	0	0	0	0	0	0	0	0
691	11.5167	0	150	1	0	0	0	0	0	0	0	0
692	11.5333	0	150	1	0	0	0	0	0	0	0	0
693	11.55	0	150	1	0	0	0	0	0	0	0	0
694	11.5667	0	150	1	0	0	0	0	0	0	0	0
695	11.5833	0	150	1	0	0	0	0	0	0	0	0
696	11.6	0	150	1	0	0	0	0	0	0	0	0
697	11.6167	0	150	1	0	0	0	0	0	0	0	0
698	11.6333	0	150	1	0	0	0	0	0	0	0	0
699	11.65	0	150	1	0	0	0	0	0	0	0	0
700	11.6667	0	150	1	0	0	0	0	0	0	0	0
701	11.6833	0	150	1	0	0	0	0	0	0	0	0
702	11.7	0	150	1	0	0	0	0	0	0	0	0
703	11.7167	0	150	1	0	0	0	0	0	0	0	0
704	11.7333	0	150	1	0	0	0	0	0	0	0	0
705	11.75	0	150	1	0	0	0	0	0	0	0	0
706	11.7667	0	150	1	0	0	0	0	0	0	0	0
707	11.7833	0	150	1	0	0	0	0	0	0	0	0
708	11.8	0	150	1	0	0	0	0	0	0	0	0
709	11.8167	0	150	1	0	0	0	0	0	0	0	0
710	11.8333	0	150	1	0	0	0	0	0	0	0	0
711	11.85	0	150	1	0	0	0	0	0	0	0	0
712	11.8667	0	150	1	0	0	0	0	0	0	0	0
713	11.8833	0	150	1	0	0	0	0	0	0	0	0
714	11.9	0	150	1	0	0	0	0	0	0	0	0
715	11.9167	0	150	1	0	0	0	0	0	0	0	0
716	11.9333	0	150	1	0	0	0	0	0	0	0	0
717	11.95	0	150	1	0	0	0	0	0	0	0	0
718	11.9667	0	150	1	0	0	0	0	0	0	0	0
719	11.9833	0	150	1	0	0	0	0	0	0	0	0
720	12	0	150	1	0	0	0	0	0	0	0	0
721	12.0167	0	314	1	0	0	0	0	0	0	0	0
722	12.0333	0	314	1	0	0	0	0	0	0	0	0
723	12.05	0	314	1	0	0	0	0	0	0	0	0
724	12.0667	0	314	1	0	0	0	0	0	0	0	0
725	12.0833	0	314	1	0	0	0	0	0	0	0	0
726	12.1	0	314	1	0	0	0	0	0	0	0	0
727	12.1167	0	314	1	0	0	0	0	0	0	0	0
728	12.1333	0	314	1	0	0	0	0	0	0	0	0
729	12.15	0	314	1	0	0	0	0	0	0	0	0
730	12.1667	0	314	1	0	0	0	0	0	0	0	0
731	12.1833	0	314	1	0	0	0	0	0	0	0	0
732	12.2	0	314	1	0	0	0	0	0	0	0	0
733	12.2167	0	314	1	0	0	0	0	0	0	0	0
734	12.2333	0	314	1	0	0	0	0	0	0	0	0
735	12.25	0	314	1	0	0	0	0	0	0	0	0
736	12.2667	0	314	1	0	0	0	0	0	0	0	0
737	12.2833	0	314	1	0	0	0	0	0	0	0	0
738	12.3	0	314	1	0	0	0	0	0	0	0	0
739	12.3167	0	314	1	0	0	0	0	0	0	0	0
740	12.3333	0	314	1	0	0	0	0	0	0	0	0
741	12.35	0	314	1	0	0	0	0	0	0	0	0
742	12.3667	0	314	2	0	0	0	0	0	0	0	0
743	12.3833	0	314	2	0	0	0	0	0	0	0	0
744	12.4	0	314	2	0	0	0	0	0	0	0	0
745	12.4167	0	314	2	0	0	0	0	0	0	0	0
746	12.4333	0	314	2	0	0	0	0	0	0	0	0
747	12.45	0	314	2	0	0	0	0	0	0	0	0
748	12.4667	0	314	2	0	0	0	0	0	0	0	0
749	12.4833	0	314	2	0	0	0	0	0	0	0	0
750	12.5	0	314	2	0	0	0	0	0	0	0	0
751	12.5167	0	314	2	0	0	0	0	0	0	0	0
752	12.5333	0	314	2	0	0	0	0	0	0	0	0
753	12.55	0	314	2	0	0	0	0	0	0	0	0
754	12.5667	0	314	2	0	0	0	0	0	0	0	0
755	12.5833	0	314	1	0	0	0	0	0	0	0	0
756	12.6	0	314	1	0	0	0	0	0	0	0	0
757	12.6167	0	314	1	0	0	0	0	0	0	0	0
758	12.6333	0	314	1	0	0	0	0	0	0	0	0
759	12.65	0	314	1	0	0	0	0	0	0	0	0
760	12.6667	0	314	1	0	0	0	0	0	0	0	0
761	12.6833	0	314	1	0	0	0	0	0	0	0	0
762	12.7	0	314	1	0	0	0	0	0	0	0	0
763	12.7167	0	314	1	0	0	0	0	0	0	0	0
764	12.7333	0	314	1	0	0	0	0	0	0	0	0
765	12.75	0	314	1	0	0	0	0	0	0	0	0
766	12.7667	0	314	1	0	0	0	0	0	0	0	0
767	12.7833	0	314	1	0	0	0	0	0	0	0	0
768	12.8	0	314	1	0	0	0	0	0	0	0	0
769	12.8167	0	314	1	0	0	0	0	0	0	0	0
770	12.8333	0	314	1	0	0	0	0	0	0	0	0
771	12.85	0	314	1	0	0	0	0	0	0	0	0
772	12.8667	0	314	1	0	0	0	0	0	0	0	0
773	12.8833	0	314	1	0	0	0	0	0	0	0	0
774	12.9	0	314	1	0	0	0	0	0	0	0	0
775	12.9167	0	314	1	0	0	0	0	0	0	0	0
776	12.9333	0	314	1	0	0	0	0	0	0	0	0
777	12.95	0	314	1	0	0	0	0	0	0	0	0
778	12.9667	0	314	1	0	0	0	0	0	0	0	0
779	12.9833	0	314	1	0	0	0	0	0	0	0	0
780	13	0	314	1	0	0	0	0	0	0	0	0
781	13.0167	0	314	1	0	0	0	0	0	0	0	0
782	13.0333	0	314	1	0	0	0	0	0	0	0	0
783	13.05	0	314	1	0	0	0	0	0	0	0	0
784	13.0667	0	314	1	0	0	0	0	0	0	0	0
785	13.0833	0	314	2	0	0	0	0	0	0	0	0
786	13.1	0	314	2	0	0	0	0	0	0	0	0
787	13.1167	0	314	2	0	0	0	0	0	0	0	0
788	13.1333	0	314	2	0	0	0	0	0	0	0	0
789	13.15	0	314	2	0	0	0	0	0	0	0	0
790	13.1667	0	314	2	0	0	0	0	0	0	0	0
791	13.1833	0	314	2	0	0	0	0	0	0	0	0
792	13.2	0	314	2	0	0	0	0	0	0	0	0
793	13.2167	0	314	2	0	0	0	0	0	0	0	0
794	13.2333	0	314	2	0	0	0	0	0	0	0	0
795	13.25	0	314	2	0	0	0	0	0	0	0	0
796	13.2667	0	314	2	0	0	0	0	0	0	0	0
797	13.2833	0	314	2	0	0	0	0	0	0	0	0
798	13.3	0	314	2	0	0	0	0	0	0	0	0
799	13.3167	0	314	3	0	0	0	0	0	0	0	0
800	13.3333	0	314	3	0	0	0	0	0	0	0	0
801	13.35	0	314	3	0	0	0	0	0	0	0	0
802	13.3667	0	314	3	0	0	0	0	0	0	0	0
803	13.3833	0	314	3	0	0	0	0	0	0	0	0
804	13.4	0	314	3	0	0	0	0	0	0	0	0
805	13.4167	0	314	3	0	0	0	0	0	0	0	0
806	13.4333	0	314	3	0	0	0	0	0	0	0	0
807	13.45	0	314	3	0	0	0	0	0	0	0	0
808	13.4667	0	314	3	0	0	0	0	0	0	0	0
809	13.4833	0	314	3	0	0	1	0	0	0	0	0
810	13.5	0	314	3	0	0	1	0	0	0	0	0
811	13.5167	0	314	3	0	0	1	0	0	0	0	0
812	13.5333	0	314	3	0	0	1	0	0	0	0	0
813	13.55	0	314	3	0	0	1	0	0	0	0	0
814	13.5667	0	314	3	0	0	1	0	0	0	0	0
815	13.5833	0	314	3	0	0	1	0	0	0	0	0
816	13.6	0	314	3	0	0	0	0	0	0	0	0
817	13.6167	0	314	3	0	0	0	0	0	0	0	0
818	13.6333	0	314	3	0	0	0	0	0	0	0	0
819	13.65	0	314	3	0	0	0	0	0	0	0	0
820	13.6667	0	314	2	0	0	0	0	0	0	0	0
821	13.6833	0	314	3	0	0	0	0	0	0	0	0
822	13.7	0	314	3	0	0	0	0	0	0	0	0
823	13.7167	0	314	3	0	0	0	0	0	0	0	0
824	13.7333	0	314	2	0	0	0	0	0	0	0	0
825	13.75	0	314	2	0	0	0	0	0	0	0	0
826	13.7667	0	314	2	0	0	0	0	0	0	0	0
827	13.7833	0	314	2	0	0	0	0	0	0	0	0
828	13.8	0	314	2	0	0	0	0	0	0	0	0
829	13.8167	0	314	2	0	0	0	0	0	0	0	0
830	13.8333	0	314	2	0	0	0	0	0	0	0	0
831	13.85	0	314	2	0	0	0	0	0	0	0	0
832	13.8667	0	314	2	0	0	0	0	0	0	0	0
833	13.8833	0	314	2	0	0	0	0	0	0	0	0
834	13.9	0	314	2	0	0	0	0	0	0	0	0
835	13.9167	0	314	2	0	0	0	0	0	0	0	0
836	13.9333	0	314	2	0	0	0	0	0	0	0	0
837	13.95	0	314	2	0	0	0	0	0	0	0	0
838	13.9667	0	314	2	0	0	0	0	0	0	0	0
839	13.9833	0	314	2	0	0	0	0	0	0	0	0
840	14	0	314	2	0	0	0	0	0	0	0	0
841	14.0167	0	314	2	0	0	0	0	0	0	0	0
842	14.0333	0	314	2	0	0	0	0	0	0	0	0
843	14.05	0	314	2	0	0	0	0	0	0	0	0
844	14.0667	2	314	1	0	0	0	0	0	0	0	0
845	14.0833	2	314	1	0	0	0	0	0	0	0	0
846	14.1	2	314	1	0	0	0	0	0	0	0	0
847	14.1167	2	314	1	0	0	0	0	0	0	0	0
848	14.1333	2	314	1	0	0	0	0	0	0	0	0
849	14.15	2	314	1	0	0	0	0	0	0	0	0
850	14.1667	2	314	1	0	0	0	0	0	0	0	0
851	14.1833	2	314	2	0	0	0	0	0	0	0	0
852	14.2	2	314	2	0	0	0	0	0	0	0	0
853	14.2167	2	314	2	0	0	0	0	0	0	0	0
854	14.2333	2	314	2	0	0	0	0	0	0	0	0
855	14.25	2	314	2	0	0	0	0	0	0	0	0
856	14.2667	3	314	2	0	0	0	0	0	0	0	0
857	14.2833	3	314	2	0	0	0	0	0	0	0	0
858	14.3	3	314	2	0	0	0	0	0	0	0	0
859	14.3167	3	314	2	0	0	0	0	0	0	0	0
860	14.3333	3	314	2	0	0	0	0	0	0	0	0
861	14.35	3	314	2	0	0	0	0	0	0	0	0
862	14.3667	3	314	2	0	0	0	0	0	0	0	0
863	14.3833	3	314	2	0	0	0	0	0	0	0	0
864	14.4	3	314	2	0	0	0	0	0	0	0	0
865	14.4167	3	314	2	0	0	0	0	0	0	0	0
866	14.4333	3	314	2	0	0	0	0	0	0	0	0
867	14.45	3	314	2	0	0	0	0	0	0	0	0
868	14.4667	3	314	2	0	0	0	0	0	0	0	0
869	14.4833	3	314	2	0	0	0	0	0	0	0	0
870	14.5	3	314	2	0	0	0	0	0	0	0	0
871	14.5167	3	314	2	0	0	0	0	0	0	0	0
872	14.5333	3	314	2	0	0	0	0	0	0	0	0
873	14.55	3	314	2	0	0	0	0	0	0	0	0
874	14.5667	3	314	2	0	0	0	0	0	0	0	0
875	14.5833	3	314	2	0	0	0	0	0	0	0	0
876	14.6	3	314	2	0	0	0	0	0	0	0	0
877	14.6167	3	314	2	0	0	0	0	0	0	0	0
878	14.6333	3	314	2	0	0	0	0	0	0	0	0
879	14.65	3	314	2	0	0	0	0	0	0	0	0
880	14.6667	1	314	2	0	0	0	0	0	0	0	0
881	14.6833	1	314	2	0	0	0	0	0	0	0	0
882	14.7	1	314	2	0	0	0	0	0	0	0	0
883	14.7167	1	314	2	0	0	0	0	0	0	0	0
884	14.7333	1	314	2	0	0	0	0	0	0	0	0
885	14.75	1	314	2	0	0	0	0	0	0	0	0
886	14.7667	1	314	2	0	0	0	0	0	0	0	0
887	14.7833	1	314	2	0	0	0	0	0	0	0	0
888	14.8	1	314	2	0	0	0	0	0	0	0	0
889	14.8167	1	314	1	0	0	0	0	0	0	0	0
890	14.8333	1	314	1	0	0	0	0	0	0	0	0
891	14.85	1	314	1	0	0	0	0	0	0	0	0
892	14.8667	1	314	1	0	0	0	0	0	0	0	0
893	14.8833	1	314	2	0	0	0	0	0	0	0	0
894	14.9	1	314	2	0	0	0	0	0	0	0	0
895	14.9167	1	314	2	0	0	0	0	0	0	0	0
896	14.9333	1	314	2	0	0	0	0	0	0	0	0
897	14.95	1	314	2	0	0	0	0	0	0	0	0
898	14.9667	1	314	2	0	0	0	0	0	0	0	0
899	14.9833	1	314	2	0	0	0	0	0	0	0	0
900	15	1	314	2	0	0	0	0	0	0	0	0
901	15.0167	1	314	2	0	0	0	0	0	0	0	0
902	15.0333	1	314	2	0	0	0	0	0	0	0	0
903	15.05	1	314	2	0	0	0	0	0	0	0	0
904	15.0667	0	314	2	0	0	0	0	0	0	0	0
905	15.0833	0	314	2	0	0	0	0	0	0	0	0
906	15.1	0	314	2	0	0	0	0	0	0	0	0
907	15.1167	0	314	2	0	0	0	0	0	0	0	0
908	15.1333	0	314	2	0	0	0	0	0	0	0	0
909	15.15	0	314	2	0	0	0	0	0	0	0	0
910	15.1667	0	314	2	0	0	0	0	0	0	0	0
911	15.1833	0	314	2	0	0	0	0	0	0	0	0
912	15.2	0	314	2	0	0	0	0	0	0	0	0
913	15.2167	0	314	1	0	0	0	0	0	0	0	0
914	15.2333	0	314	1	0	0	0	0	0	0	0	0
915	15.25	0	314	1	0	0	0	0	0	0	0	0
916	15.2667	0	314	1	0	0	0	0	0	0	0	0
917	15.2833	0	314	1	0	0	0	0	0	0	0	0
918	15.3	0	314	1	0	0	0	0	0	0	0	0
919	15.3167	0	314	1	0	0	0	0	0	0	0	0
920	15.3333	0	314	1	0	0	0	0	0	0	0	0
921	15.35	0	314	1	0	0	0	0	0	0	0	0
922	15.3667	0	314	1	0	0	0	0	0	0	0	0
923	15.3833	0	314	1	0	0	0	0	0	0	0	0
924	15.4	0	314	1	0	0	0	0	0	0	0	0
925	15.4167	0	314	1	0	0	0	0	0	0	0	0
926	15.4333	0	314	1	0	0	0	0	0	0	0	0
927	15.45	0	314	1	0	0	0	0	0	0	0	0
928	15.4667	0	314	1	0	0	0	0	0	0	0	0
929	15.4833	0	314	1	0	0	0	0	0	0	0	0
930	15.5	0	314	1	0	0	0	0	0	0	0	0
931	15.5167	0	314	1	0	0	0	0	0	0	0	0
932	15.5333	0	314	1	0	0	0	0	0	0	0	0
933	15.55	0	314	1	0	0	0	0	0	0	0	0
934	15.5667	0	314	1	0	0	0	0	0	0	0	0
935	15.5833	0	314	1	0	0	0	0	0	0	0	0
936	15.6	0	314	1	0	0	0	0	0	0	0	0
937	15.6167	0	314	1	0	0	0	0	0	0	0	0
938	15.6333	0	314	1	0	0	0	0	0	0	0	0
939	15.65	0	314	1	0	0	0	0	0	0	0	0
940	15.6667	0	314	1	0	0	0	0	0	0	0	0
941	15.6833	0	314	1	0	0	0	0	0	0	0	0
942	15.7	0	314	1	0	0	0	0	0	0	0	0
943	15.7167	0	314	1	0	0	0	0	0	0	0	0
944	15.7333	0	314	1	0	0	0	0	0	0	0	0
945	15.75	0	314	1	0	0	0	0	0	0	0	0
946	15.7667	0	314	1	0	0	0	0	0	0	0	0
947	15.7833	0	314	1	0	0	0	0	0	0	0	0
948	15.8	0	314	1	0	0	0	0	0	0	0	0
949	15.8167	0	314	1	0	0	0	0	0	0	0	0
950	15.8333	0	314	1	0	0	0	0	0	0	0	0
951	15.85	0	314	1	0	0	0	0	0	0	0	0
952	15.8667	0	314	1	0	0	0	0	0	0	0	0
953	15.8833	0	314	1	0	0	0	0	0	0	0	0
954	15.9	0	314	1	0	0	0	0	0	0	0	0
955	15.9167	0	314	1	0	0	0	0	0	0	0	0
956	15.9333	0	314	1	0	0	0	0	0	0	0	0
957	15.95	0	314	1	0	0	0	0	0	0	0	0
958	15.9667	0	314	1	0	0	0	0	0	0	0	0
959	15.9833	0	314	1	0	0	0	0	0	0	0	0
960	16	0	314	1	0	0	0	0	0	0	0	0
961	16.0167	0	314	1	0	0	0	0	0	0	0	0
962	16.0333	0	314	1	0	0	0	0	0	0	0	0
963	16.05	0	314	1	0	0	0	0	0	0	0	0
964	16.0667	0	314	1	0	0	0	0	0	0	0	0
965	16.0833	0	314	1	0	0	0	0	0	0	0	0
966	16.1	0	314	1	0	0	0	0	0	0	0	0
967	16.1167	0	314	1	0	0	0	0	0	0	0	0
968	16.1333	0	314	1	0	0	0	0	0	0	0	0
969	16.15	0	314	1	0	0	0	0	0	0	0	0
970	16.1667	0	314	1	0	0	0	0	0	0	0	0
971	16.1833	0	314	1	0	0	0	0	0	0	0	0
972	16.2	0	314	1	0	0	0	0	0	0	0	0
973	16.2167	0	314	1	0	0	0	0	0	0	0	0
974	16.2333	0	314	1	0	0	0	0	0	0	0	0
975	16.25	0	314	1	0	0	0	0	0	0	0	0
976	16.2667	0	314	3	0	0	0	0	0	0	0	0
977	16.2833	0	314	3	0	0	0	0	0	0	0	0
978	16.3	0	314	3	0	0	0	0	0	0	0	0
979	16.3167	0	314	2	0	0	0	0	0	0	0	0
980	16.3333	0	314	2	0	0	0	0	0	0	0	0
981	16.35	0	314	2	0	0	0	0	0	0	0	0
982	16.3667	0	314	2	0	0	0	0	0	0	0	0
983	16.3833	0	314	2	0	0	0	0	0	0	0	0
984	16.4	0	314	2	0	0	0	0	0	0	0	0
985	16.4167	0	314	2	0	0	0	0	0	0	0	0
986	16.4333	0	314	2	0	0	0	0	0	0	0	0
987	16.45	0	314	2	0	0	0	0	0	0	0	0
988	16.4667	0	314	2	0	0	0	0	0	0	0	0
989	16.4833	0	314	2	0	0	0	0	0	0	0	0
990	16.5	0	314	2	0	0	0	0	0	0	0	0
991	16.5167	0	314	3	0	0	0	0	0	0	0	0
992	16.5333	0	314	3	0	0	0	0	0	0	0	0
993	16.55	0	314	3	0	0	0	0	0	0	0	0
994	16.5667	0	314	3	0	0	0	0	0	0	0	0
995	16.5833	0	314	3	0	0	0	0	0	0	0	0
996	16.6	0	314	3	0	0	0	0	0	0	0	0
997	16.6167	0	314	3	0	0	0	0	0	0	0	0
998	16.6333	0	314	3	0	0	0	0	0	0	0	0
999	16.65	0	314	3	0	0	0	0	0	0	0	0
1000	16.6667	0	314	3	0	0	0	0	0	0	0	0
1001	16.6833	0	314	2	0	0	0	0	0	0	0	0
1002	16.7	0	314	2	0	0	0	0	0	0	0	0
1003	16.7167	0	314	2	0	0	0	0	0	0	0	0
1004	16.7333	0	314	2	0	0	0	0	0	0	0	0
1005	16.75	0	314	2	0	0	0	0	0	0	0	0
1006	16.7667	0	314	2	0	0	0	0	0	0	0	0
1007	16.7833	0	314	2	0	0	0	0	0	0	0	0
1008	16.8	0	314	2	0	0	0	0	0	0	0	0
1009	16.8167	0	314	2	0	0	0	0	0	0	0	0
1010	16.8333	0	314	2	0	0	0	0	0	0	0	0
1011	16.85	0	314	2	0	0	0	0	0	0	0	0
1012	16.8667	0	314	2	0	0	0	0	0	0	0	0
1013	16.8833	0	314	2	0	0	0	0	0	0	0	0
1014	16.9	0	314	2	0	0	0	0	0	0	0	0
1015	16.9167	0	314	2	0	0	0	0	0	0	0	0
1016	16.9333	0	314	2	0	0	0	0	0	0	0	0
1017	16.95	0	314	2	0	0	0	0	0	0	0	0
1018	16.9667	0	314	2	0	0	0	0	0	0	0	0
1019	16.9833	0	314	2	0	0	0	0	0	0	0	0
1020	17	0	314	2	0	0	0	0	0	0	0	0
1021	17.0167	0	314	2	0	0	0	0	0	0	0	0
1022	17.0333	0	314	2	0	0	0	0	0	0	0	0
1023	17.05	0	314	2	0	0	0	0	0	0	0	0
1024	17.0667	0	314	2	0	0	0	0	0	0	0	0
1025	17.0833	0	314	2	0	0	0	0	0	0	0	0
1026	17.1	0	314	2	0	0	0	0	0	0	0	0
1027	17.1167	0	314	2	0	0	2	0	0	0	0	0
1028	17.1333	0	314	2	0	0	2	0	0	0	0	0
1029	17.15	0	314	2	0	0	2	0	0	0	0	0
1030	17.1667	0	314	2	0	0	2	0	0	0	0	0
1031	17.1833	0	314	2	0	0	2	0	0	0	0	0
1032	17.2	0	314	2	0	0	2	0	0	0	0	0
1033	17.2167	0	314	2	0	0	1	0	0	0	0	0
1034	17.2333	0	314	2	0	0	1	0	0	0	0	0
1035	17.25	0	314	2	0	0	1	0	0	0	0	0
1036	17.2667	0	314	2	0	0	2	0	0	0	0	0
1037	17.2833	0	314	2	0	0	3	0	0	0	0	0
1038	17.3	0	314	2	0	0	3	0	0	0	0	0
1039	17.3167	0	314	2	0	0	1	0	0	0	0	0
1040	17.3333	0	314	2	0	0	0	0	0	0	0	0
1041	17.35	0	314	2	0	0	0	0	0	0	0	0
1042	17.3667	0	314	2	0	0	0	0	0	0	0	0
1043	17.3833	0	314	2	0	0	0	0	0	0	0	0
1044	17.4	0	314	2	0	0	0	0	0	0	0	0
1045	17.4167	0	314	2	0	0	0	0	0	0	0	0
1046	17.4333	0	314	1	0	0	0	0	0	0	0	0
1047	17.45	0	314	1	0	0	0	0	0	0	0	0
1048	17.4667	0	314	1	0	0	0	0	0	0	0	0
1049	17.4833	0	314	1	0	0	0	0	0	0	0	0
1050	17.5	0	314	1	0	0	0	0	0	0	0	0
1051	17.5167	0	314	1	0	0	0	0	0	0	0	0
1052	17.5333	0	314	1	0	0	0	0	0	0	0	0
1053	17.55	0	314	1	0	0	0	0	0	0	0	0
1054	17.5667	0	314	1	0	0	0	0	0	0	0	0
1055	17.5833	0	314	1	0	0	0	0	0	0	0	0
1056	17.6	0	314	1	0	0	0	0	0	0	0	0
1057	17.6167	0	314	1	0	0	0	0	0	0	0	0
1058	17.6333	0	314	1	0	0	0	0	0	0	0	0
1059	17.65	0	314	1	0	0	0	0	0	0	0	0
1060	17.6667	0	314	1	0	0	0	0	0	0	0	0
1061	17.6833	0	314	1	0	0	0	0	0	0	0	0
1062	17.7	0	314	1	0	0	0	0	0	0	0	0
1063	17.7167	0	314	1	0	0	0	0	0	0	0	0
1064	17.7333	0	314	1	0	0	0	0	0	0	0	0
1065	17.75	0	314	1	0	0	0	0	0	0	0	0
1066	17.7667	2	314	1	0	0	0	0	0	0	0	0
1067	17.7833	2	314	1	0	0	0	0	0	0	0	0
1068	17.8	2	314	1	0	0	0	0	0	0	0	0
1069	17.8167	2	314	1	0	0	0	0	0	0	0	0
1070	17.8333	2	314	2	0	0	0	0	0	0	0	0
1071	17.85	2	314	2	0	0	0	0	0	0	0	0
1072	17.8667	2	314	2	0	0	0	0	0	0	0	0
1073	17.8833	2	314	2	0	0	0	0	0	0	0	0
1074	17.9	2	314	2	0	0	0	0	0	0	0	0
1075	17.9167	2	314	2	0	0	0	0	0	0	0	0
1076	17.9333	2	314	2	0	0	0	0	0	0	0	0
1077	17.95	2	314	2	0	0	0	0	0	0	0	0
1078	17.9667	2	314	2	0	0	0	0	0	0	0	0
1079	17.9833	2	314	2	0	0	0	0	0	0	0	0
1080	18	2	314	2	0	0	0	0	0	0	0	0
1081	18.0167	2	314	1	0	0	0	0	0	0	0	0
1082	18.0333	2	314	1	0	0	0	0	0	0	0	0
1083	18.05	2	314	1	0	0	0	0	0	0	0	0
1084	18.0667	2	314	1	0	0	0	0	0	0	0	0
1085	18.0833	2	314	1	0	0	0	0	0	0	0	0
1086	18.1	2	314	1	0	0	0	0	0	0	0	0
1087	18.1167	2	314	1	0	0	0	0	0	0	0	0
1088	18.1333	2	314	1	0	0	0	0	0	0	0	0
1089	18.15	2	314	1	0	0	0	0	0	0	0	0
1090	18.1667	2	314	1	0	0	0	0	0	0	0	0
1091	18.1833	2	314	2	0	0	0	0	0	0	0	0
1092	18.2	2	314	2	0	0	0	0	0	0	0	0
1093	18.2167	2	314	2	0	0	0	0	0	0	0	0
1094	18.2333	0	314	2	0	0	0	0	0	0	0	0
1095	18.25	0	314	2	0	0	0	0	0	0	0	0
1096	18.2667	2	314	2	0	0	0	0	0	0	0	0
1097	18.2833	2	314	2	0	0	0	0	0	0	0	0
1098	18.3	2	314	2	0	0	0	0	0	0	0	0
1099	18.3167	2	314	2	0	0	0	0	0	0	0	0
1100	18.3333	2	314	2	0	0	0	0	0	0	0	0
1101	18.35	2	314	2	0	0	0	0	0	0	0	0
1102	18.3667	2	314	2	0	0	0	0	0	0	0	0
1103	18.3833	2	314	2	0	0	0	0	0	0	0	0
1104	18.4	2	314	2	0	0	0	0	0	0	0	0
1105	18.4167	2	314	2	0	0	0	1	0	0	0	0
1106	18.4333	2	314	2	0	0	0	1	0	0	0	0
1107	18.45	2	314	2	0	0	0	1	0	0	0	0
1108	18.4667	2	314	2	0	0	0	1	0	0	0	0
1109	18.4833	2	314	2	0	0	0	1	0	0	0	0
1110	18.5	2	314	2	0	0	0	1	0	0	0	0
1111	18.5167	2	314	2	0	0	0	1	0	0	0	0
1112	18.5333	2	314	2	0	0	0	1	0	0	0	0
1113	18.55	2	314	2	0	0	0	0	0	0	0	0
1114	18.5667	2	314	2	0	0	0	0	0	0	0	0
1115	18.5833	2	314	2	0	0	0	0	0	0	0	0
1116	18.6	2	314	2	0	0	0	0	0	0	0	0
1117	18.6167	2	314	2	0	0	0	0	0	0	0	0
1118	18.6333	2	314	3	0	0	0	0	0	0	0	0
1119	18.65	2	314	3	0	0	0	0	0	0	0	0
1120	18.6667	2	314	3	0	0	0	0	0	0	0	0
1121	18.6833	2	314	3	0	0	0	0	0	0	0	0
1122	18.7	2	314	3	0	0	0	0	0	0	0	0
1123	18.7167	2	314	3	0	0	0	0	0	0	0	0
1124	18.7333	2	314	3	0	0	0	0	0	0	0	0
1125	18.75	0	314	3	0	0	0	0	0	0	0	0
1126	18.7667	2	314	3	0	0	0	0	0	0	0	0
1127	18.7833	2	314	3	0	0	0	0	0	0	0	0
1128	18.8	2	314	3	0	0	0	0	0	0	0	0
1129	18.8167	2	314	3	0	0	0	0	0	0	0	0
1130	18.8333	2	314	3	0	0	0	0	0	0	0	0
1131	18.85	2	314	3	0	0	0	0	0	0	0	0
1132	18.8667	2	314	3	0	0	0	0	0	0	0	0
1133	18.8833	2	314	3	0	0	0	0	0	0	0	0
1134	18.9	2	314	3	0	0	0	0	0	0	0	0
1135	18.9167	2	314	2	0	0	0	0	0	0	0	0
1136	18.9333	2	314	2	0	0	0	0	0	0	0	0
1137	18.95	2	314	2	0	0	0	0	0	0	0	0
1138	18.9667	2	314	2	0	0	0	0	0	0	0	0
1139	18.9833	2	314	2	0	0	0	0	0	0	0	0
1140	19	2	314	2	0	0	0	0	0	0	0	0
1141	19.0167	2	314	2	0	0	0	0	0	0	0	0
1142	19.0333	2	314	2	0	0	0	0	0	0	0	0
1143	19.05	2	314	2	0	0	0	0	0	0	0	0
1144	19.0667	2	314	2	0	0	0	0	0	0	0	0
1145	19.0833	2	314	2	0	0	0	0	0	0	0	0
1146	19.1	2	314	2	0	0	0	0	0	0	0	0
1147	19.1167	2	314	2	0	0	0	0	0	0	0	0
1148	19.1333	2	314	2	0	0	0	0	0	0	0	0
1149	19.15	2	314	2	0	0	0	0	0	0	0	0
1150	19.1667	2	314	2	0	0	0	0	0	0	0	0
1151	19.1833	2	314	2	0	0	0	0	0	0	0	0
1152	19.2	2	314	2	0	0	0	0	0	0	0	0
1153	19.2167	2	314	2	0	0	0	0	0	0	0	0
1154	19.2333	2	314	2	0	0	0	0	0	0	0	0
1155	19.25	0	314	2	0	0	0	0	0	0	0	0
1156	19.2667	3	314	2	0	0	0	0	0	0	0	0
1157	19.2833	3	314	2	0	0	0	0	0	0	0	0
1158	19.3	3	314	2	0	0	0	0	0	0	0	0
1159	19.3167	3	314	2	0	0	0	0	0	0	0	0
1160	19.3333	3	314	2	0	0	0	0	0	0	0	0
1161	19.35	3	314	2	0	0	0	0	0	0	0	0
1162	19.3667	3	314	2	0	0	0	0	0	0	0	0
1163	19.3833	3	314	2	0	0	0	0	0	0	0	0
1164	19.4	3	314	2	0	0	0	0	0	0	0	0
1165	19.4167	3	314	2	0	0	0	0	0	0	0	0
1166	19.4333	3	314	2	0	0	0	0	0	0	0	0
1167	19.45	3	314	2	0	0	0	0	0	0	0	0
1168	19.4667	3	314	2	0	0	0	0	0	0	0	0
1169	19.4833	3	314	2	0	0	0	0	0	0	0	0
1170	19.5	3	314	2	0	0	0	0	0	0	0	0
1171	19.5167	3	314	2	0	0	0	0	0	0	0	0
1172	19.5333	3	314	2	0	0	0	0	0	0	0	0
1173	19.55	3	314	2	0	0	0	0	0	0	0	0
1174	19.5667	3	314	2	0	0	0	0	0	0	0	0
1175	19.5833	3	314	2	0	0	0	0	0	0	0	0
1176	19.6	3	314	2	0	0	0	0	0	0	0	0
1177	19.6167	3	314	2	0	0	0	0	0	0	0	0
1178	19.6333	3	314	1	0	0	0	0	0	0	0	0
1179	19.65	3	314	1	0	0	0	0	0	0	0	0
1180	19.6667	3	314	1	0	0	0	0	0	0	0	0
1181	19.6833	3	314	1	0	0	0	0	0	0	0	0
1182	19.7	3	314	1	0	0	0	0	0	0	0	0
1183	19.7167	3	314	1	0	0	0	0	0	0	0	0
1184	19.7333	3	314	1	0	0	0	0	0	0	0	0
1185	19.75	0	314	1	0	0	0	0	0	0	0	0
1186	19.7667	1	314	1	0	0	0	0	0	0	0	0
1187	19.7833	1	314	1	0	0	0	0	0	0	0	0
1188	19.8	1	314	1	0	0	0	0	0	0	0	0
1189	19.8167	1	314	1	0	0	0	0	0	0	0	0
1190	19.8333	1	314	1	0	0	0	0	0	0	0	0
1191	19.85	1	314	1	0	0	0	0	0	0	0	0
1192	19.8667	1	314	1	0	0	0	0	0	0	0	0
1193	19.8833	1	314	1	0	0	0	0	0	0	0	0
1194	19.9	1	314	1	0	0	0	0	0	0	0	0
1195	19.9167	1	314	1	0	0	0	0	0	0	0	0
1196	19.9333	1	314	1	0	0	0	0	0	0	0	0
1197	19.95	1	314	1	0	0	0	0	0	0	0	0
1198	19.9667	1	314	1	0	0	0	0	0	0	0	0
1199	19.9833	1	314	1	0	0	0	0	0	0	0	0
1200	20	1	314	1	0	0	0	0	0	0	0	0
1201	20.0167	1	314	1	0	0	0	0	0	0	0	0
1202	20.0333	1	314	1	0	0	0	0	0	0	0	0
1203	20.05	1	314	1	0	0	0	0	0	0	0	0
1204	20.0667	1	314	1	0	0	0	0	0	0	0	0
1205	20.0833	1	314	3	0	0	0	0	0	0	0	0
1206	20.1	1	314	3	0	0	0	0	0	0	0	0
1207	20.1167	1	314	3	0	0	0	0	0	0	0	0
1208	20.1333	1	314	3	0	0	0	0	0	0	0	0
1209	20.15	1	314	3	0	0	0	0	0	0	0	0
1210	20.1667	1	314	3	0	0	0	0	0	0	0	0
1211	20.1833	1	314	3	0	0	0	0	0	0	0	0
1212	20.2	1	314	3	0	0	0	0	0	0	0	0
1213	20.2167	1	314	3	0	0	0	0	0	0	0	0
1214	20.2333	1	314	3	0	0	0	1	0	0	0	0
1215	20.25	0	314	3	0	0	0	1	0	0	0	0
1216	20.2667	0	314	3	0	0	0	1	0	0	0	0
1217	20.2833	0	314	3	0	0	0	1	0	0	0	0
1218	20.3	0	314	3	0	0	0	1	0	0	0	0
1219	20.3167	0	314	2	0	0	0	0	0	0	0	0
1220	20.3333	0	314	2	0	0	1	0	0	0	0	0
1221	20.35	0	314	2	0	0	1	0	0	0	0	0
1222	20.3667	0	314	2	0	0	1	0	0	0	0	0
1223	20.3833	0	314	2	0	0	1	0	0	0	0	0
1224	20.4	0	314	2	0	0	1	0	0	0	0	0
1225	20.4167	0	314	2	0	0	0	0	0	0	0	0
1226	20.4333	0	314	2	0	0	0	0	0	0	0	0
1227	20.45	0	314	2	0	0	0	0	0	0	0	0
1228	20.4667	0	314	2	0	0	0	0	0	0	0	0
1229	20.4833	0	314	2	0	0	0	0	0	0	0	0
1230	20.5	0	314	2	0	0	0	0	0	0	0	0
1231	20.5167	0	314	2	0	0	0	0	0	0	0	0
1232	20.5333	0	314	1	0	0	0	0	0	0	0	0
1233	20.55	0	314	1	0	0	0	0	0	0	0	0
1234	20.5667	0	314	1	0	0	0	0	0	0	0	0
1235	20.5833	0	314	1	0	0	0	0	0	0	0	0
1236	20.6	0	314	1	0	0	0	0	0	0	0	0
1237	20.6167	0	314	1	0	0	0	0	0	0	0	0
1238	20.6333	1	314	1	0	0	0	0	0	0	0	0
1239	20.65	1	314	1	0	0	0	0	0	0	0	0
1240	20.6667	1	314	1	0	0	0	0	0	0	0	0
1241	20.6833	1	314	1	0	0	0	0	0	0	0	0
1242	20.7	1	314	1	0	0	0	0	0	0	0	0
1243	20.7167	1	314	1	0	0	0	0	0	0	0	0
1244	20.7333	1	314	1	0	0	0	0	0	0	0	0
1245	20.75	1	314	1	0	0	0	0	0	0	0	0
1246	20.7667	0	314	1	0	0	0	0	0	0	0	0
1247	20.7833	1	314	1	0	0	0	0	0	0	0	0
1248	20.8	1	314	1	0	0	0	0	0	0	0	0
1249	20.8167	1	314	1	0	0	0	0	0	0	0	0
1250	20.8333	1	314	1	0	0	0	0	0	0	0	0
1251	20.85	1	314	1	0	0	0	0	0	0	0	0
1252	20.8667	1	314	1	0	0	0	0	0	0	0	0
1253	20.8833	1	314	1	0	0	0	0	0	0	0	0
1254	20.9	1	314	1	0	0	0	0	0	0	0	0
1255	20.9167	1	314	1	0	0	0	0	0	0	0	0
1256	20.9333	1	314	1	0	0	0	0	0	0	0	0
1257	20.95	1	314	1	0	0	0	0	0	0	0	0
1258	20.9667	1	314	1	0	0	0	0	0	0	0	0
1259	20.9833	1	314	1	0	0	0	0	0	0	0	0
1260	21	1	314	0	0	0	0	0	0	0	0	0
1261	21.0167	1	314	0	0	0	0	0	0	0	0	0
1262	21.0333	1	314	0	0	0	0	0	0	0	0	0
1263	21.05	1	314	0	0	0	0	0	0	0	0	0
1264	21.0667	1	314	0	0	0	0	0	0	0	0	0
1265	21.0833	2	314	0	0	0	0	0	0	0	0	0
1266	21.1	2	314	0	0	0	0	0	0	0	0	0
1267	21.1167	2	314	0	0	0	0	0	0	0	0	0
1268	21.1333	2	314	0	0	0	0	0	0	0	0	0
1269	21.15	2	314	0	0	0	0	0	0	0	0	0
1270	21.1667	2	314	0	0	0	0	0	0	0	0	0
1271	21.1833	2	314	0	0	0	0	0	0	0	0	0
1272	21.2	2	314	0	0	0	0	0	0	0	0	0
1273	21.2167	3	314	1	0	0	0	0	0	0	0	0
1274	21.2333	1	314	1	0	0	0	0	0	0	0	0
1275	21.25	1	314	1	0	0	0	0	0	0	0	0
1276	21.2667	1	314	1	0	0	0	0	0	0	0	0
1277	21.2833	1	314	1	0	0	0	0	0	0	0	0
1278	21.3	1	314	0	0	0	0	0	0	0	0	0
1279	21.3167	1	314	0	0	0	0	0	0	0	0	0
1280	21.3333	1	314	0	0	0	0	0	0	0	0	0
1281	21.35	1	314	0	0	0	0	0	0	0	0	0
1282	21.3667	0	314	0	0	0	0	0	0	0	0	0
1283	21.3833	0	314	0	0	0	0	0	0	0	0	0
1284	21.4	0	314	0	0	0	0	0	0	0	0	0
1285	21.4167	0	314	0	0	0	0	0	0	0	0	0
1286	21.4333	0	314	0	0	0	1	0	0	0	0	0
1287	21.45	0	314	0	0	0	1	0	0	0	0	0
1288	21.4667	0	314	0	0	0	1	0	0	0	0	0
1289	21.4833	0	314	0	0	0	1	0	0	0	0	0
1290	21.5	0	314	0	0	0	1	0	0	0	0	0
1291	21.5167	0	314	1	0	0	0	0	0	0	0	0
1292	21.5333	0	314	1	0	0	0	0	0	0	0	0
1293	21.55	0	314	1	0	0	0	0	0	0	0	0
1294	21.5667	0	314	0	0	0	0	0	0	0	0	0
1295	21.5833	0	314	0	0	0	0	0	0	0	0	0
1296	21.6	0	314	0	0	0	0	0	0	0	0	0
1297	21.6167	0	314	0	0	0	0	0	0	0	0	0
1298	21.6333	0	314	0	0	0	0	0	0	0	0	0
1299	21.65	0	314	0	0	0	0	0	0	0	0	0
1300	21.6667	0	314	0	0	0	0	0	0	0	0	0
1301	21.6833	0	314	0	0	0	0	0	0	0	0	0
1302	21.7	0	314	0	0	0	0	0	0	0	0	0
1303	21.7167	0	314	0	0	0	0	0	0	0	0	0
1304	21.7333	0	314	0	0	0	0	0	0	0	0	0
1305	21.75	0	314	0	0	0	0	0	0	0	0	0
1306	21.7667	0	314	0	0	0	0	0	0	0	0	0
1307	21.7833	0	314	0	0	0	0	0	0	0	0	0
1308	21.8	0	314	0	0	0	0	0	0	0	0	0
1309	21.8167	0	314	0	0	0	0	0	0	0	0	0
1310	21.8333	0	314	0	0	0	1	0	0	0	0	0
1311	21.85	0	314	0	0	0	1	0	0	0	0	0
1312	21.8667	0	314	0	0	0	1	0	0	0	0	0
1313	21.8833	0	314	0	0	0	1	0	0	0	0	0
1314	21.9	0	314	0	0	0	1	0	0	0	0	0
1315	21.9167	0	314	0	0	0	0	0	0	0	0	0
1316	21.9333	0	314	0	0	0	0	0	0	0	0	0
1317	21.95	0	314	0	0	0	0	0	0	0	0	0
1318	21.9667	0	314	0	0	0	0	0	0	0	0	0
1319	21.9833	0	314	2	0	0	0	0	0	0	0	0
1320	22	0	314	2	0	0	0	0	0	0	0	0
1321	22.0167	0	314	1	0	0	0	0	0	0	0	0
1322	22.0333	0	314	1	0	0	0	0	0	0	0	0
1323	22.05	0	314	1	0	0	0	0	0	0	0	0
1324	22.0667	0	314	1	0	0	0	0	0	0	0	0
1325	22.0833	0	314	1	0	0	0	0	0	0	0	0
1326	22.1	0	314	1	0	0	0	0	0	0	0	0
1327	22.1167	0	314	1	0	0	0	0	0	0	0	0
1328	22.1333	0	314	1	0	0	0	0	0	0	0	0
1329	22.15	0	314	1	0	0	0	0	0	0	0	0
1330	22.1667	0	314	1	0	0	0	0	0	0	0	0
1331	22.1833	0	314	1	0	0	0	0	0	0	0	0
1332	22.2	0	314	1	0	0	0	0	0	0	0	0
1333	22.2167	0	314	1	0	0	0	0	0	0	0	0
1334	22.2333	0	314	2	0	0	0	0	0	0	0	0
1335	22.25	0	314	2	0	0	0	0	0	0	0	0
1336	22.2667	0	314	2	0	0	0	0	0	0	0	0
1337	22.2833	0	314	2	0	0	0	0	0	0	0	0
1338	22.3	0	314	2	0	0	0	0	0	0	0	0
1339	22.3167	0	314	1	0	0	0	0	0	0	0	0
1340	22.3333	0	314	1	0	0	0	0	0	0	0	0
1341	22.35	0	314	1	0	0	1	0	0	0	0	0
1342	22.3667	0	314	1	0	0	1	0	0	0	0	0
1343	22.3833	0	314	1	0	0	1	0	0	0	0	0
1344	22.4	0	314	1	0	0	1	0	0	0	0	0
1345	22.4167	0	314	1	0	0	1	0	0	0	0	0
1346	22.4333	0	314	1	0	0	1	0	0	0	0	0
1347	22.45	0	314	1	0	0	1	0	0	0	0	0
1348	22.4667	0	314	1	0	0	1	0	0	0	0	0
1349	22.4833	0	314	1	0	0	1	0	0	0	0	0
1350	22.5	0	314	1	0	0	1	0	0	0	0	0
1351	22.5167	0	314	2	0	0	1	0	0	0	0	0
1352	22.5333	0	314	2	0	0	1	0	0	0	0	0
1353	22.55	0	314	2	0	0	0	0	0	0	0	0
1354	22.5667	0	314	2	0	0	0	0	0	0	0	0
1355	22.5833	0	314	2	0	0	0	0	0	0	0	0
1356	22.6	0	314	2	0	0	0	0	0	0	0	0
1357	22.6167	0	314	2	0	0	0	0	0	0	0	0
1358	22.6333	0	314	2	0	0	0	0	0	0	0	0
1359	22.65	0	314	2	0	0	0	0	0	0	0	0
1360	22.6667	0	314	2	0	0	0	0	0	0	0	0
1361	22.6833	0	314	2	0	0	0	0	0	0	0	0
1362	22.7	0	314	2	0	0	0	0	0	0	0	0
1363	22.7167	0	314	2	0	0	0	0	0	0	0	0
1364	22.7333	0	314	2	0	0	0	0	0	0	0	0
1365	22.75	0	314	2	0	0	0	0	0	0	0	0
1366	22.7667	0	314	2	0	0	0	0	0	0	0	0
1367	22.7833	0	314	2	0	0	0	0	0	0	0	0
1368	22.8	0	314	2	0	0	0	0	0	0	0	0
1369	22.8167	0	314	1	0	0	0	0	0	0	0	0
1370	22.8333	0	314	1	0	0	0	0	0	0	0	0
1371	22.85	0	314	1	0	0	0	0	0	0	0	0
1372	22.8667	0	314	1	0	0	0	0	0	0	0	0
1373	22.8833	0	314	1	0	0	0	0	0	0	0	0
1374	22.9	0	314	1	0	0	0	0	0	0	0	0
1375	22.9167	0	314	1	0	0	0	0	0	0	0	0
1376	22.9333	0	314	1	0	0	0	0	0	0	0	0
1377	22.95	0	314	1	0	0	0	0	0	0	0	0
1378	22.9667	0	314	1	0	0	0	0	0	0	0	0
1379	22.9833	0	314	1	0	0	0	0	0	0	0	0
1380	23	0	314	1	0	0	0	0	0	0	0	0
1381	23.0167	0	314	1	0	0	0	0	0	0	0	0
1382	23.0333	0	314	1	0	0	0	0	0	0	0	0
1383	23.05	0	314	1	0	0	0	0	0	0	0	0
1384	23.0667	0	314	1	0	0	0	0	0	0	0	0
1385	23.0833	0	314	1	0	0	0	0	0	0	0	0
1386	23.1	0	314	1	0	0	0	0	0	0	0	0
1387	23.1167	0	314	1	0	0	0	0	0	0	0	0
1388	23.1333	0	314	1	0	0	0	0	0	0	0	0
1389	23.15	0	314	1	0	0	0	0	0	0	0	0
1390	23.1667	0	314	1	0	0	0	0	0	0	0	0
1391	23.1833	0	314	1	0	0	0	0	0	0	0	0
1392	23.2	0	314	1	0	0	0	0	0	0	0	0
1393	23.2167	0	314	1	0	0	0	0	0	0	0	0
1394	23.2333	0	314	1	0	0	0	0	0	0	0	0
1395	23.25	0	314	1	0	0	0	0	0	0	0	0
1396	23.2667	0	314	1	0	0	0	0	0	0	0	0
1397	23.2833	0	314	1	0	0	0	0	0	0	0	0
1398	23.3	0	314	1	0	0	0	0	0	0	0	0
1399	23.3167	0	314	1	0	0	0	0	0	0	0	0
1400	23.3333	0	314	1	0	0	0	0	0	0	0	0
1401	23.35	0	314	1	0	0	0	0	0	0	0	0
1402	23.3667	0	314	1	0	0	0	0	0	0	0	0
1403	23.3833	0	314	1	0	0	0	0	0	0	0	0
1404	23.4	0	314	1	0	0	0	0	0	0	0	0
1405	23.4167	0	314	1	0	0	0	0	0	0	0	0
1406	23.4333	0	314	1	0	0	0	0	0	0	0	0
1407	23.45	0	314	1	0	0	0	0	0	0	0	0
1408	23.4667	0	314	1	0	0	0	0	0	0	0	0
1409	23.4833	0	314	1	0	0	0	0	0	0	0	0
1410	23.5	0	314	1	0	0	0	0	0	0	0	0
1411	23.5167	0	314	1	0	0	0	0	0	0	0	0
1412	23.5333	0	314	1	0	0	0	0	0	0	0	0
1413	23.55	0	314	1	0	0	0	0	0	0	0	0
1414	23.5667	0	314	1	0	0	0	0	0	0	0	0
1415	23.5833	0	314	1	0	0	0	0	0	0	0	0
1416	23.6	0	314	1	0	0	0	0	0	0	0	0
1417	23.6167	0	314	1	0	0	0	0	0	0	0	0
1418	23.6333	0	314	1	0	0	0	0	0	0	0	0
1419	23.65	0	314	1	0	0	0	0	0	0	0	0
1420	23.6667	0	314	1	0	0	0	0	0	0	0	0
1421	23.6833	0	314	1	0	0	0	0	0	0	0	0
1422	23.7	0	314	1	0	0	0	0	0	0	0	0
1423	23.7167	0	314	1	0	0	0	0	0	0	0	0
1424	23.7333	0	314	1	0	0	0	0	0	0	0	0
1425	23.75	0	314	1	0	0	0	0	0	0	0	0
1426	23.7667	0	314	1	0	0	0	0	0	0	0	0
1427	23.7833	0	314	1	0	0	0	0	0	0	0	0
1428	23.8	0	314	1	0	0	0	0	0	0	0	0
1429	23.8167	0	314	1	0	0	0	0	0	0	0	0
1430	23.8333	0	314	1	0	0	0	0	0	0	0	0
1431	23.85	0	314	1	0	0	0	0	0	0	0	0
1432	23.8667	0	314	1	0	0	0	0	0	0	0	0
1433	23.8833	0	314	1	0	0	0	0	0	0	0	0
1434	23.9	0	314	1	0	0	0	0	0	0	0	0
1435	23.9167	0	314	1	0	0	0	0	0	0	0	0
1436	23.9333	0	314	1	0	0	0	0	0	0	0	0
1437	23.95	0	314	1	0	0	0	0	0	0	0	0
1438	23.9667	0	314	1	0	0	0	0	0	0	0	0
1439	23.9833	0	314	1	0	0	0	0	0	0	0	0
1440	24	0	314	1	0	0	0	0	0	0	0	0
1441	24.0167	0	533	1	0	0	0	0	0	0	0	0
1442	24.0333	0	533	1	0	0	0	0	0	0	0	0
1443	24.05	0	533	1	0	0	0	0	0	0	0	0
1444	24.0667	0	533	1	0	0	0	0	0	0	0	0
1445	24.0833	0	533	1	0	0	0	0	0	0	0	0
1446	24.1	0	533	1	0	0	0	0	0	0	0	0
1447	24.1167	0	533	1	0	0	0	0	0	0	0	0
1448	24.1333	1	533	1	0	0	0	0	0	0	0	0
1449	24.15	1	533	1	0	0	0	0	0	0	0	0
1450	24.1667	1	533	1	0	0	0	0	0	0	0	0
1451	24.1833	0	533	2	0	0	0	0	0	0	0	0
1452	24.2	0	533	2	0	0	0	0	0	0	0	0
1453	24.2167	0	533	2	0	0	0	0	0	0	0	0
1454	24.2333	0	533	2	0	0	0	0	0	0	0	0
1455	24.25	0	533	2	0	0	0	0	0	0	0	0
1456	24.2667	0	533	2	0	0	0	0	0	0	0	0
1457	24.2833	0	533	2	0	0	0	0	0	0	0	0
1458	24.3	0	533	2	0	0	0	0	0	0	0	0
1459	24.3167	0	533	2	0	0	0	0	0	0	0	0
1460	24.3333	0	533	2	0	0	0	0	0	0	0	0
1461	24.35	0	533	2	0	0	0	0	0	0	0	0
1462	24.3667	0	533	2	0	0	0	0	0	0	0	0
1463	24.3833	0	533	1	0	0	0	0	0	0	0	0
1464	24.4	0	533	1	0	0	0	0	0	0	0	0
1465	24.4167	0	533	1	0	0	0	0	0	0	0	0
1466	24.4333	0	533	2	0	0	0	0	0	0	0	0
1467	24.45	0	533	2	0	0	0	0	0	0	0	0
1468	24.4667	0	533	1	0	0	0	0	0	0	0	0
1469	24.4833	0	533	1	0	0	0	0	0	0	0	0
1470	24.5	0	533	1	0	0	0	0	0	0	0	0
1471	24.5167	0	533	1	0	0	0	0	0	0	0	0
1472	24.5333	0	533	1	0	0	0	0	0	0	0	0
1473	24.55	0	533	1	0	0	0	0	0	0	0	0
1474	24.5667	0	533	1	0	0	0	0	0	0	0	0
1475	24.5833	0	533	1	0	0	0	0	0	0	0	0
1476	24.6	0	533	1	0	0	0	0	0	0	0	0
1477	24.6167	0	533	1	0	0	0	0	0	0	0	0
1478	24.6333	0	533	1	0	0	0	0	0	0	0	0
1479	24.65	0	533	1	0	0	0	0	0	0	0	0
1480	24.6667	0	533	1	0	0	0	0	0	0	0	0
1481	24.6833	0	533	1	0	0	0	0	0	0	0	0
1482	24.7	0	533	1	0	0	0	0	0	0	0	0
1483	24.7167	0	533	1	0	0	0	0	0	0	0	0
1484	24.7333	0	533	1	0	0	0	0	0	0	0	0
1485	24.75	0	533	1	0	0	0	0	0	0	0	0
1486	24.7667	0	533	1	0	0	0	0	0	0	0	0
1487	24.7833	0	533	1	0	0	0	0	0	0	0	0
1488	24.8	0	533	1	0	0	0	0	0	0	0	0
1489	24.8167	0	533	1	0	0	0	0	0	0	0	0
1490	24.8333	0	533	1	0	0	0	0	0	0	0	0
1491	24.85	0	533	1	0	0	0	0	0	0	0	0
1492	24.8667	0	533	1	0	0	0	0	0	0	0	0
1493	24.8833	0	533	1	0	0	0	0	0	0	0	0
1494	24.9	0	533	1	0	0	0	0	0	0	0	0
1495	24.9167	0	533	1	0	0	0	0	0	0	0	0
1496	24.9333	0	533	1	0	0	0	0	0	0	0	0
1497	24.95	0	533	1	0	0	0	0	0	0	0	0
1498	24.9667	0	533	1	0	0	0	0	0	0	0	0
1499	24.9833	0	533	1	0	0	0	0	0	0	0	0
1500	25	0	533	1	0	0	0	0	0	0	0	0
1501	25.0167	0	533	1	0	0	0	0	0	0	0	0
1502	25.0333	0	533	0	0	0	0	0	0	0	0	0
1503	25.05	0	533	0	0	0	0	0	0	0	0	0
1504	25.0667	0	533	0	0	0	0	0	0	0	0	0
1505	25.0833	0	533	0	0	0	0	0	0	0	0	0
1506	25.1	0	533	0	0	0	0	0	0	0	0	0
1507	25.1167	0	533	0	0	0	0	0	0	0	0	0
1508	25.1333	0	533	0	0	0	0	0	0	0	0	0
1509	25.15	0	533	0	0	0	0	0	0	0	0	0
1510	25.1667	0	533	0	0	0	0	0	0	0	0	0
1511	25.1833	0	533	0	0	0	0	0	0	0	0	0
1512	25.2	0	533	0	0	0	0	0	0	0	0	0
1513	25.2167	0	533	0	0	0	0	0	0	0	0	0
1514	25.2333	0	533	0	0	0	0	0	0	0	0	0
1515	25.25	0	533	0	0	0	0	0	0	0	0	0
1516	25.2667	0	533	0	0	0	0	0	0	0	0	0
1517	25.2833	0	533	0	0	0	0	0	0	0	0	0
1518	25.3	0	533	0	0	0	0	0	0	0	0	0
1519	25.3167	0	533	0	0	0	0	0	0	0	0	0
1520	25.3333	0	533	0	0	0	0	0	0	0	0	0
1521	25.35	0	533	0	0	0	0	0	0	0	0	0
1522	25.3667	0	533	0	0	0	0	0	0	0	0	0
1523	25.3833	0	533	0	0	0	0	0	0	0	0	0
1524	25.4	0	533	0	0	0	0	0	0	0	0	0
1525	25.4167	0	533	0	0	0	0	0	0	0	0	0
1526	25.4333	0	533	0	0	0	0	0	0	0	0	0
1527	25.45	0	533	0	0	0	0	0	0	0	0	0
1528	25.4667	0	533	0	0	0	0	0	0	0	0	0
1529	25.4833	0	533	1	0	0	0	0	0	0	0	0
1530	25.5	0	533	1	0	0	0	0	0	0	0	0
1531	25.5167	0	533	1	0	0	0	0	0	0	0	0
1532	25.5333	0	533	1	0	0	0	0	0	0	0	0
1533	25.55	0	533	1	0	0	0	0	0	0	0	0
1534	25.5667	0	533	1	0	0	0	0	0	0	0	0
1535	25.5833	0	533	0	0	0	0	0	0	0	0	0
1536	25.6	0	533	0	0	0	0	0	0	0	0	0
1537	25.6167	0	533	0	0	0	0	0	0	0	0	0
1538	25.6333	0	533	0	0	0	0	0	0	0	0	0
1539	25.65	0	533	0	0	0	0	0	0	0	0	0
1540	25.6667	0	533	0	0	0	0	0	0	0	0	0
1541	25.6833	0	533	0	0	0	0	0	0	0	0	0
1542	25.7	0	533	0	0	0	0	0	0	0	0	0
1543	25.7167	0	533	0	0	0	0	0	0	0	0	0
1544	25.7333	0	533	0	0	0	0	0	0	0	0	0
1545	25.75	0	533	0	0	0	0	0	0	0	0	0
1546	25.7667	0	533	0	0	0	0	0	0	0	0	0
1547	25.7833	0	533	0	0	0	0	0	0	0	0	0
1548	25.8	0	533	0	0	0	0	0	0	0	0	0
1549	25.8167	0	533	0	0	0	0	0	0	0	0	0
1550	25.8333	0	533	0	0	0	0	0	0	0	0	0
1551	25.85	0	533	0	0	0	0	0	0	0	0	0
1552	25.8667	0	533	0	0	0	0	0	0	0	0	0
1553	25.8833	0	533	0	0	0	0	0	0	0	0	0
1554	25.9	0	533	0	0	0	0	0	0	0	0	0
1555	25.9167	0	533	0	0	0	0	0	0	0	0	0
1556	25.9333	0	533	0	0	0	0	0	0	0	0	0
1557	25.95	0	533	0	0	0	0	0	0	0	0	0
1558	25.9667	0	533	0	0	0	0	0	0	0	0	0
1559	25.9833	0	533	0	0	0	0	0	0	0	0	0
1560	26	0	533	0	0	0	0	0	0	0	0	0
1561	26.0167	0	533	0	0	0	0	0	0	0	0	0
1562	26.0333	0	533	0	0	0	0	0	0	0	0	0
1563	26.05	0	533	0	0	0	0	0	0	0	0	0
1564	26.0667	0	533	1	0	0	1	0	0	0	0	0
1565	26.0833	0	533	1	0	0	1	0	0	0	0	0
1566	26.1	0	533	1	0	0	1	0	0	0	0	0
1567	26.1167	0	533	1	0	0	0	0	0	0	0	0
1568	26.1333	0	533	1	0	0	0	0	0	0	0	0
1569	26.15	0	533	1	0	0	0	0	0	0	0	0
1570	26.1667	0	533	1	0	0	0	0	0	0	0	0
1571	26.1833	0	533	1	0	0	0	0	0	0	0	0
1572	26.2	0	533	1	0	0	0	0	0	0	0	0
1573	26.2167	0	533	1	0	0	0	0	0	0	0	0
1574	26.2333	0	533	1	0	0	0	0	0	0	0	0
1575	26.25	0	533	1	0	0	0	0	0	0	0	0
1576	26.2667	0	533	1	0	0	0	0	0	0	0	0
1577	26.2833	0	533	1	0	0	0	0	0	0	0	0
1578	26.3	0	533	1	0	0	0	0	0	0	0	0
1579	26.3167	0	533	0	0	0	0	0	0	0	0	0
1580	26.3333	0	533	0	0	0	0	0	0	0	0	0
1581	26.35	0	533	0	0	0	0	0	0	0	0	0
1582	26.3667	0	533	0	0	0	0	0	0	0	0	0
1583	26.3833	0	533	0	0	0	0	0	0	0	0	0
1584	26.4	0	533	0	0	0	0	0	0	0	0	0
1585	26.4167	0	533	0	0	0	0	0	0	0	0	0
1586	26.4333	0	533	0	0	0	0	0	0	0	0	0
1587	26.45	0	533	0	0	0	0	0	0	0	0	0
1588	26.4667	0	533	0	0	0	0	0	0	0	0	0
1589	26.4833	0	533	0	0	0	0	0	0	0	0	0
1590	26.5	0	533	0	0	0	0	0	0	0	0	0
1591	26.5167	0	533	0	0	0	0	0	0	0	0	0
1592	26.5333	0	533	0	0	0	0	0	0	0	0	0
1593	26.55	0	533	0	0	0	0	0	0	0	0	0
1594	26.5667	0	533	0	0	0	0	0	0	0	0	0
1595	26.5833	0	533	0	0	0	0	0	0	0	0	0
1596	26.6	0	533	0	0	0	0	0	0	0	0	0
1597	26.6167	0	533	0	0	0	0	0	0	0	0	0
1598	26.6333	0	533	0	0	0	0	0	0	0	0	0
1599	26.65	0	533	0	0	0	0	0	0	0	0	0
1600	26.6667	0	533	0	0	0	0	0	0	0	0	0
1601	26.6833	0	533	0	0	0	0	0	0	0	0	0
1602	26.7	0	533	0	0	0	0	0	0	0	0	0
1603	26.7167	0	533	0	0	0	0	0	0	0	0	0
1604	26.7333	0	533	1	0	0	0	0	0	0	0	0
1605	26.75	0	533	1	0	0	0	0	0	0	0	0
1606	26.7667	0	533	3	0	0	0	0	0	0	0	0
1607	26.7833	0	533	2	0	0	0	0	0	0	0	0
1608	26.8	0	533	0	0	0	0	0	0	0	0	0
1609	26.8167	0	533	0	0	0	0	0	0	0	0	0
1610	26.8333	0	533	0	0	0	0	0	0	0	0	0
1611	26.85	0	533	0	0	0	0	0	0	0	0	0
1612	26.8667	0	533	0	0	0	0	0	0	0	0	0
1613	26.8833	0	533	1	0	0	0	0	0	0	0	0
1614	26.9	0	533	1	0	0	0	0	0	0	0	0
1615	26.9167	0	533	1	0	0	0	0	0	0	0	0
1616	26.9333	0	533	1	0	0	0	0	0	0	0	0
1617	26.95	0	533	0	0	0	0	0	0	0	0	0
1618	26.9667	0	533	0	0	0	0	0	0	0	0	0
1619	26.9833	0	533	0	0	0	0	0	0	0	0	0
1620	27	0	533	0	0	0	0	0	0	0	0	0
1621	27.0167	0	533	0	0	0	0	0	0	0	0	0
1622	27.0333	0	533	0	0	0	0	0	0	0	0	0
1623	27.05	0	533	0	0	0	0	0	0	0	0	0
1624	27.0667	0	533	0	0	0	0	0	0	0	0	0
1625	27.0833	0	533	0	0	0	0	0	0	0	0	0
1626	27.1	0	533	0	0	0	0	0	0	0	0	0
1627	27.1167	0	533	0	0	0	0	0	0	0	0	0
1628	27.1333	0	533	0	0	0	0	0	0	0	0	0
1629	27.15	0	533	0	0	0	0	0	0	0	0	0
1630	27.1667	0	533	0	0	0	0	0	0	0	0	0
1631	27.1833	0	533	0	0	0	0	0	0	0	0	0
1632	27.2	0	533	0	0	0	0	0	0	0	0	0
1633	27.2167	0	533	0	0	0	0	0	0	0	0	0
1634	27.2333	0	533	0	0	0	0	0	0	0	0	0
1635	27.25	0	533	0	0	0	0	0	0	0	0	0
1636	27.2667	0	533	0	0	0	0	0	0	0	0	0
1637	27.2833	0	533	0	0	0	0	0	0	0	0	0
1638	27.3	0	533	0	0	0	0	0	0	0	0	0
1639	27.3167	0	533	0	0	0	0	0	0	0	0	0
1640	27.3333	0	533	0	0	0	0	0	0	0	0	0
1641	27.35	0	533	0	0	0	0	0	0	0	0	0
1642	27.3667	0	533	0	0	0	0	0	0	0	0	0
1643	27.3833	0	533	1	0	0	0	0	0	0	0	0
1644	27.4	0	533	1	0	0	0	0	0	0	0	0
1645	27.4167	0	533	1	0	0	0	0	0	0	0	0
1646	27.4333	0	533	0	0	0	0	0	0	0	0	0
1647	27.45	0	533	0	0	0	0	0	0	0	0	0
1648	27.4667	0	533	0	0	0	0	0	0	0	0	0
1649	27.4833	0	533	0	0	0	0	0	0	0	0	0
1650	27.5	0	533	0	0	0	0	0	0	0	0	0
1651	27.5167	0	533	0	0	0	0	0	0	0	0	0
1652	27.5333	0	533	0	0	0	0	0	0	0	0	0
1653	27.55	0	533	0	0	0	0	0	0	0	0	0
1654	27.5667	0	533	0	0	0	0	0	0	0	0	0
1655	27.5833	0	533	0	0	0	0	0	0	0	0	0
1656	27.6	0	533	0	0	0	0	0	0	0	0	0
1657	27.6167	0	533	0	0	0	0	0	0	0	0	0
1658	27.6333	0	533	0	0	0	0	0	0	0	0	0
1659	27.65	0	533	0	0	0	0	0	0	0	0	0
1660	27.6667	0	533	0	0	0	0	0	0	0	0	0
1661	27.6833	0	533	0	0	0	0	0	0	0	0	0
1662	27.7	0	533	0	0	0	0	0	0	0	0	0
1663	27.7167	0	533	0	0	0	0	0	0	0	0	0
1664	27.7333	0	533	0	0	0	0	0	0	0	0	0
1665	27.75	0	533	0	0	0	0	0	0	0	0	0
1666	27.7667	0	533	0	0	0	0	0	0	0	0	0
1667	27.7833	0	533	0	0	0	0	0	0	0	0	0
1668	27.8	0	533	0	0	0	0	0	0	0	0	0
1669	27.8167	0	533	0	0	0	0	0	0	0	0	0
1670	27.8333	0	533	0	0	0	0	0	0	0	0	0
1671	27.85	0	533	0	0	0	0	0	0	0	0	0
1672	27.8667	0	533	0	0	0	0	0	0	0	0	0
1673	27.8833	0	533	2	0	0	0	0	0	0	0	0
1674	27.9	0	533	2	0	0	0	0	0	0	0	0
1675	27.9167	0	533	1	0	0	0	0	0	0	0	0
1676	27.9333	0	533	1	0	0	0	0	0	0	0	0
1677	27.95	0	533	1	0	0	0	0	0	0	0	0
1678	27.9667	0	533	1	0	0	0	0	0	0	0	0
1679	27.9833	0	533	1	0	0	0	0	0	0	0	0
1680	28	0	533	1	0	0	0	0	0	0	0	0
1681	28.0167	0	533	1	0	0	0	0	0	0	0	0
1682	28.0333	0	533	1	0	0	0	0	0	0	0	0
1683	28.05	0	533	1	0	0	0	0	0	0	0	0
1684	28.0667	0	533	1	0	0	0	0	0	0	0	0
1685	28.0833	0	533	1	0	0	0	0	0	0	0	0
1686	28.1	0	533	1	0	0	0	0	0	0	0	0
1687	28.1167	0	533	1	0	0	0	0	0	0	0	0
1688	28.1333	0	533	1	0	0	0	0	0	0	0	0
1689	28.15	0	533	1	0	0	0	0	0	0	0	0
1690	28.1667	0	533	1	0	0	0	0	0	0	0	0
1691	28.1833	0	533	1	0	0	0	0	0	0	0	0
1692	28.2	0	533	1	0	0	0	0	0	0	0	0
1693	28.2167	0	533	2	0	0	0	0	0	0	0	0
1694	28.2333	0	533	2	0	0	0	0	0	0	0	0
1695	28.25	0	533	2	0	0	0	0	0	0	0	0
1696	28.2667	0	533	2	0	0	0	0	0	0	0	0
1697	28.2833	0	533	2	0	0	0	0	0	0	0	0
1698	28.3	0	533	2	0	0	0	0	0	0	0	0
1699	28.3167	0	533	2	0	0	0	0	0	0	0	0
1700	28.3333	0	533	2	0	0	0	0	0	0	0	0
1701	28.35	0	533	2	0	0	0	0	0	0	0	0
1702	28.3667	0	533	2	0	0	0	0	0	0	0	0
1703	28.3833	0	533	2	0	0	0	0	0	0	0	0
1704	28.4	0	533	2	0	0	0	0	0	0	0	0
1705	28.4167	0	533	3	0	0	0	0	0	0	0	0
1706	28.4333	0	533	3	0	0	0	0	0	0	0	0
1707	28.45	0	533	3	0	0	0	0	0	0	0	0
1708	28.4667	0	533	3	0	0	0	0	0	0	0	0
1709	28.4833	0	533	3	0	0	0	0	0	0	0	0
1710	28.5	0	533	3	0	0	0	0	0	0	0	0
1711	28.5167	0	533	3	0	0	0	0	0	0	0	0
1712	28.5333	0	533	3	0	0	0	0	0	0	0	0
1713	28.55	0	533	3	0	0	0	0	0	0	0	0
1714	28.5667	0	533	3	0	0	0	0	0	0	0	0
1715	28.5833	0	533	3	0	0	0	0	0	0	0	0
1716	28.6	0	533	3	0	0	0	0	0	0	0	0
1717	28.6167	0	533	3	0	0	0	0	0	0	0	0
1718	28.6333	0	533	3	0	0	0	0	0	0	0	0
1719	28.65	0	533	3	0	0	0	0	0	0	0	0
1720	28.6667	0	533	3	0	0	0	0	0	0	0	0
1721	28.6833	1	533	2	0	0	0	0	0	0	0	0
1722	28.7	1	533	2	0	0	0	0	0	0	0	0
1723	28.7167	0	533	2	0	0	0	0	0	0	0	0
1724	28.7333	0	533	2	0	0	0	0	0	0	0	0
1725	28.75	0	533	2	0	0	0	0	0	0	0	0
1726	28.7667	0	533	2	0	0	0	0	0	0	0	0
1727	28.7833	0	533	3	0	0	0	0	0	0	0	0
1728	28.8	0	533	2	0	0	0	0	0	0	0	0
1729	28.8167	0	533	2	0	0	0	0	0	0	0	0
1730	28.8333	0	533	2	0	0	0	0	0	0	0	0
1731	28.85	0	533	2	0	0	0	0	0	0	0	0
1732	28.8667	0	533	2	0	0	0	0	0	0	0	0
1733	28.8833	0	533	2	0	0	0	0	0	0	0	0
1734	28.9	0	533	2	0	0	0	0	0	0	0	0
1735	28.9167	0	533	2	0	0	0	0	0	0	0	0
1736	28.9333	0	533	2	0	0	0	0	0	0	0	0
1737	28.95	0	533	2	0	0	0	0	0	0	0	0
1738	28.9667	0	533	2	0	0	0	0	0	0	0	0
1739	28.9833	0	533	2	0	0	0	0	0	0	0	0
1740	29	0	533	2	0	0	0	0	0	0	0	0
1741	29.0167	0	533	2	0	0	0	0	0	0	0	0
1742	29.0333	0	533	2	0	0	0	0	0	0	0	0
1743	29.05	0	533	2	0	0	0	0	0	0	0	0
1744	29.0667	0	533	2	0	0	0	0	0	0	0	0
1745	29.0833	0	533	2	0	0	0	0	0	0	0	0
1746	29.1	0	533	2	0	0	0	0	0	0	0	0
1747	29.1167	0	533	2	0	0	0	0	0	0	0	0
1748	29.1333	0	533	2	0	0	0	0	0	0	0	0
1749	29.15	0	533	1	0	0	0	0	0	0	0	0
1750	29.1667	0	533	1	0	0	0	0	0	0	0	0
1751	29.1833	0	533	1	0	0	0	0	0	0	0	0
1752	29.2	0	533	1	0	0	0	0	0	0	0	0
1753	29.2167	0	533	0	0	0	0	0	0	0	0	0
1754	29.2333	0	533	0	0	0	0	0	0	0	0	0
1755	29.25	0	533	0	0	0	0	0	0	0	0	0
1756	29.2667	0	533	0	0	0	0	0	0	0	0	0
1757	29.2833	0	533	0	0	0	0	0	0	0	0	0
1758	29.3	0	533	0	0	0	0	0	0	0	0	0
1759	29.3167	0	533	0	0	0	0	0	0	0	0	0
1760	29.3333	0	533	0	0	0	0	0	0	0	0	0
1761	29.35	0	533	0	0	0	0	0	0	0	0	0
1762	29.3667	0	533	0	0	0	0	0	0	0	0	0
1763	29.3833	0	533	0	0	0	0	0	0	0	0	0
1764	29.4	0	533	0	0	0	0	0	0	0	0	0
1765	29.4167	0	533	0	0	0	0	0	0	0	0	0
1766	29.4333	0	533	1	0	0	0	0	0	0	0	0
1767	29.45	0	533	1	0	0	0	0	0	0	0	0
1768	29.4667	0	533	1	0	0	0	0	0	0	0	0
1769	29.4833	0	533	1	0	0	0	0	0	0	0	0
1770	29.5	0	533	1	0	0	0	0	0	0	0	0
1771	29.5167	0	533	1	0	0	0	0	0	0	0	0
1772	29.5333	0	533	1	0	0	0	0	0	0	0	0
1773	29.55	0	533	1	0	0	0	0	0	0	0	0
1774	29.5667	0	533	1	0	0	0	0	0	0	0	0
1775	29.5833	0	533	1	0	0	2	0	0	0	0	0
1776	29.6	0	533	0	0	0	2	0	0	0	0	0
1777	29.6167	0	533	0	0	0	0	0	0	0	0	0
1778	29.6333	0	533	0	0	0	0	0	0	0	0	0
1779	29.65	0	533	0	0	0	0	0	0	0	0	0
1780	29.6667	0	533	0	0	0	0	0	0	0	0	0
1781	29.6833	0	533	0	0	0	0	0	0	0	0	0
1782	29.7	0	533	0	0	0	0	0	0	0	0	0
1783	29.7167	0	533	0	0	0	0	0	0	0	0	0
1784	29.7333	0	533	0	0	0	0	0	0	0	0	0
1785	29.75	0	533	0	0	0	0	0	0	0	0	0
1786	29.7667	0	533	0	0	0	0	0	0	0	0	0
1787	29.7833	0	533	0	0	0	0	0	0	0	0	0
1788	29.8	0	533	0	0	0	0	0	0	0	0	0
1789	29.8167	0	533	0	0	0	0	0	0	0	0	0
1790	29.8333	0	533	0	0	0	0	0	0	0	0	0
1791	29.85	0	533	0	0	0	0	0	0	0	0	0
1792	29.8667	0	533	0	0	0	0	0	0	0	0	0
1793	29.8833	0	533	0	0	0	0	0	0	0	0	0
1794	29.9	0	533	0	0	0	0	0	0	0	0	0
1795	29.9167	0	533	2	0	0	0	0	0	0	0	0
1796	29.9333	0	533	2	0	0	0	0	0	0	0	0
1797	29.95	0	533	2	0	0	0	0	0	0	0	0
1798	29.9667	0	533	2	0	0	1	0	0	0	0	0
1799	29.9833	0	533	1	0	0	1	0	0	0	0	0
1800	30	0	533	0	0	0	1	0	0	0	0	0
1801	30.0167	0	533	0	0	0	1	0	0	0	0	0
1802	30.0333	0	533	0	0	0	0	0	0	0	0	0
1803	30.05	0	533	0	0	0	0	0	0	0	0	0
1804	30.0667	0	533	0	0	0	0	0	0	0	0	0
1805	30.0833	0	533	0	0	0	0	0	0	0	0	0
1806	30.1	0	533	0	0	0	0	0	0	0	0	0
1807	30.1167	0	533	0	0	0	0	0	0	0	0	0
1808	30.1333	0	533	0	0	0	0	0	0	0	0	0
1809	30.15	0	533	0	0	0	0	0	0	0	0	0
1810	30.1667	0	533	0	0	0	0	0	0	0	0	0
1811	30.1833	0	533	0	0	0	0	0	0	0	0	0
1812	30.2	0	533	0	0	0	0	0	0	0	0	0
1813	30.2167	0	533	0	0	0	0	0	0	0	0	0
1814	30.2333	0	533	0	0	0	0	0	0	0	0	0
1815	30.25	0	533	0	0	0	0	0	0	0	0	0
1816	30.2667	0	533	0	0	0	0	0	0	0	0	0
1817	30.2833	0	533	0	0	0	0	0	0	0	0	0
1818	30.3	0	533	0	0	0	0	0	0	0	0	0
1819	30.3167	0	533	0	0	0	0	0	0	0	0	0
1820	30.3333	0	533	0	0	0	0	0	0	0	0	0
1821	30.35	0	533	0	0	0	0	0	0	0	0	0
1822	30.3667	0	533	0	0	0	0	0	0	0	0	0
1823	30.3833	0	533	0	0	0	0	0	0	0	0	0
1824	30.4	0	533	0	0	0	0	0	0	0	0	0
1825	30.4167	0	533	0	0	0	0	0	0	0	0	0
1826	30.4333	0	533	0	0	0	0	0	0	0	0	0
1827	30.45	0	533	0	0	0	0	0	0	0	0	0
1828	30.4667	0	533	0	0	0	0	0	0	0	0	0
1829	30.4833	0	533	0	0	0	0	0	0	0	0	0
1830	30.5	0	533	0	0	0	0	0	0	0	0	0
1831	30.5167	0	533	0	0	0	0	0	0	0	0	0
1832	30.5333	0	533	0	0	0	0	0	0	0	0	0
1833	30.55	0	533	0	0	0	0	0	0	0	0	0
1834	30.5667	0	533	0	0	0	0	0	0	0	0	0
1835	30.5833	0	533	0	0	0	1	0	0	0	0	0
1836	30.6	0	533	0	0	0	1	0	0	0	0	0
1837	30.6167	0	533	0	0	0	1	0	0	0	0	0
1838	30.6333	0	533	0	0	0	1	0	0	0	0	0
1839	30.65	0	533	0	0	0	0	0	0	0	0	0
1840	30.6667	0	533	0	0	0	0	0	0	0	0	0
1841	30.6833	0	533	0	0	0	0	0	0	0	0	0
1842	30.7	0	533	0	0	0	0	0	0	0	0	0
1843	30.7167	0	533	0	0	0	0	0	0	0	0	0
1844	30.7333	0	533	0	0	0	0	0	0	0	0	0
1845	30.75	0	533	0	0	0	0	0	0	0	0	0
1846	30.7667	0	533	0	0	0	0	0	0	0	0	0
1847	30.7833	0	533	0	0	0	0	0	0	0	0	0
1848	30.8	0	533	0	0	0	0	0	0	0	0	0
1849	30.8167	0	533	0	0	0	0	0	0	0	0	0
1850	30.8333	0	533	1	0	0	0	0	0	0	0	0
1851	30.85	0	533	1	0	0	0	0	0	0	0	0
1852	30.8667	0	533	1	0	0	0	0	0	0	0	0
1853	30.8833	0	533	1	0	0	0	0	0	0	0	0
1854	30.9	0	533	1	0	0	0	0	0	0	0	0
1855	30.9167	0	533	1	0	0	0	0	0	0	0	0
1856	30.9333	0	533	1	0	0	0	0	0	0	0	0
1857	30.95	0	533	1	0	0	0	0	0	0	0	0
1858	30.9667	0	533	1	0	0	0	0	0	0	0	0
1859	30.9833	0	533	1	0	0	0	0	0	0	0	0
1860	31	0	533	1	0	0	0	0	0	0	0	0
1861	31.0167	0	533	1	0	0	0	0	0	0	0	0
1862	31.0333	0	533	1	0	0	0	0	0	0	0	0
1863	31.05	0	533	1	0	0	0	0	0	0	0	0
1864	31.0667	0	533	1	0	0	0	0	0	0	0	0
1865	31.0833	0	533	1	0	0	0	0	0	0	0	0
1866	31.1	0	533	1	0	0	0	0	0	0	0	0
1867	31.1167	0	533	1	0	0	0	0	0	0	0	0
1868	31.1333	0	533	1	0	0	0	0	0	0	0	0
1869	31.15	0	533	1	0	0	0	0	0	0	0	0
1870	31.1667	0	533	1	0	0	0	0	0	0	0	0
1871	31.1833	0	533	1	0	0	0	0	0	0	0	0
1872	31.2	0	533	1	0	0	0	0	0	0	0	0
1873	31.2167	0	533	1	0	0	0	0	0	0	0	0
1874	31.2333	0	533	1	0	0	0	0	0	0	0	0
1875	31.25	0	533	1	0	0	0	0	0	0	0	0
1876	31.2667	0	533	1	0	0	0	0	0	0	0	0
1877	31.2833	0	533	1	0	0	0	0	0	0	0	0
1878	31.3	0	533	1	0	0	0	0	0	0	0	0
1879	31.3167	0	533	1	0	0	0	0	0	0	0	0
1880	31.3333	0	533	1	0	0	0	0	0	0	0	0
1881	31.35	0	533	1	0	0	0	0	0	0	0	0
1882	31.3667	0	533	1	0	0	0	0	0	0	0	0
1883	31.3833	0	533	1	0	0	0	0	0	0	0	0
1884	31.4	0	533	1	0	0	0	0	0	0	0	0
1885	31.4167	0	533	2	0	0	0	0	0	0	0	0
1886	31.4333	0	533	2	0	0	0	0	0	0	0	0
1887	31.45	0	533	2	0	0	0	0	0	0	0	0
1888	31.4667	0	533	2	0	0	0	0	0	0	0	0
1889	31.4833	0	533	2	0	0	0	0	0	0	0	0
1890	31.5	0	533	2	0	0	0	0	0	0	0	0
1891	31.5167	0	533	2	0	0	0	0	0	0	0	0
1892	31.5333	0	533	2	0	0	0	0	0	0	0	0
1893	31.55	0	533	2	0	0	0	0	0	0	0	0
1894	31.5667	0	533	2	0	0	0	0	0	0	0	0
1895	31.5833	0	533	2	0	0	0	0	0	0	0	0
1896	31.6	0	533	2	0	0	0	0	0	0	0	0
1897	31.6167	0	533	2	0	0	0	0	0	0	0	0
1898	31.6333	0	533	2	0	0	0	0	0	0	0	0
1899	31.65	0	533	2	0	0	0	0	0	0	0	0
1900	31.6667	0	533	2	0	0	0	0	0	0	0	0
1901	31.6833	0	533	3	0	0	0	0	0	0	0	0
1902	31.7	0	533	3	0	0	0	0	0	0	0	0
1903	31.7167	0	533	4	0	0	0	0	0	0	0	0
1904	31.7333	0	533	3	0	0	0	0	0	0	0	0
1905	31.75	0	533	2	0	0	0	0	0	0	0	0
1906	31.7667	0	533	2	0	0	0	0	0	0	0	0
1907	31.7833	1	533	2	0	0	0	0	0	0	0	0
1908	31.8	1	533	2	0	0	0	0	0	0	0	0
1909	31.8167	0	533	2	0	0	0	0	0	0	0	0
1910	31.8333	0	533	2	0	0	0	0	0	0	0	0
1911	31.85	0	533	2	0	0	0	0	0	0	0	0
1912	31.8667	0	533	2	0	0	0	0	0	0	0	0
1913	31.8833	0	533	2	0	0	0	0	0	0	0	0
1914	31.9	0	533	2	0	0	0	0	0	0	0	0
1915	31.9167	0	533	2	0	0	0	0	0	0	0	0
1916	31.9333	0	533	2	0	0	0	0	0	0	0	0
1917	31.95	0	533	2	0	0	0	0	0	0	0	0
1918	31.9667	0	533	2	0	0	0	0	0	0	0	0
1919	31.9833	0	533	2	0	0	0	0	0	0	0	0
1920	32	0	533	2	0	0	0	0	0	0	0	0
1921	32.0167	0	533	2	0	0	0	0	0	0	0	0
1922	32.0333	0	533	2	0	0	0	0	0	0	0	0
1923	32.05	0	533	2	0	0	0	0	0	0	0	0
1924	32.0667	0	533	2	0	0	0	0	0	0	0	0
1925	32.0833	0	533	3	0	0	0	0	0	0	0	0
1926	32.1	0	533	3	0	0	0	0	0	0	0	0
1927	32.1167	0	533	3	0	0	0	0	0	0	0	0
1928	32.1333	0	533	3	0	0	0	0	0	0	0	0
1929	32.15	0	533	3	0	0	0	0	0	0	0	0
1930	32.1667	0	533	3	0	0	0	0	0	0	0	0
1931	32.1833	0	533	3	0	0	0	0	0	0	0	0
1932	32.2	0	533	2	0	0	0	0	0	0	0	0
1933	32.2167	0	533	2	0	0	0	0	0	0	0	0
1934	32.2333	0	533	2	0	0	0	0	0	0	0	0
1935	32.25	0	533	1	0	0	0	0	0	0	0	0
1936	32.2667	0	533	1	0	0	0	0	0	0	0	0
1937	32.2833	0	533	1	0	0	0	0	0	0	0	0
1938	32.3	0	533	1	0	0	0	0	0	0	0	0
1939	32.3167	0	533	1	0	0	0	0	0	0	0	0
1940	32.3333	0	533	1	0	0	0	0	0	0	0	0
1941	32.35	0	533	1	0	0	0	0	0	0	0	0
1942	32.3667	0	533	1	0	0	0	0	0	0	0	0
1943	32.3833	0	533	1	0	0	0	0	0	0	0	0
1944	32.4	0	533	1	0	0	0	0	0	0	0	0
1945	32.4167	0	533	1	0	0	0	0	0	0	0	0
1946	32.4333	0	533	1	0	0	0	0	0	0	0	0
1947	32.45	0	533	1	0	0	0	0	0	0	0	0
1948	32.4667	0	533	1	0	0	0	0	0	0	0	0
1949	32.4833	0	533	2	0	0	0	0	0	0	0	0
1950	32.5	0	533	2	0	0	0	0	0	0	0	0
1951	32.5167	0	533	2	0	0	0	0	0	0	0	0
1952	32.5333	0	533	3	0	0	0	0	0	0	0	0
1953	32.55	0	533	3	0	0	0	0	0	0	0	0
1954	32.5667	0	533	3	0	0	0	0	0	0	0	0
1955	32.5833	0	533	3	0	0	0	0	0	0	0	0
1956	32.6	0	533	3	0	0	0	0	0	0	0	0
1957	32.6167	0	533	2	0	0	0	0	0	0	0	0
1958	32.6333	0	533	2	0	0	0	0	0	0	0	0
1959	32.65	0	533	2	0	0	0	0	0	0	0	0
1960	32.6667	0	533	2	0	0	0	0	0	0	0	0
1961	32.6833	0	533	2	0	0	0	0	0	0	0	0
1962	32.7	0	533	2	0	0	0	0	0	0	0	0
1963	32.7167	0	533	2	0	0	0	0	0	0	0	0
1964	32.7333	0	533	2	0	0	0	0	0	0	0	0
1965	32.75	0	533	2	0	0	0	0	0	0	0	0
1966	32.7667	0	533	2	0	0	0	0	0	0	0	0
1967	32.7833	1	533	2	0	0	0	0	0	0	0	0
1968	32.8	1	533	2	0	0	0	0	0	0	0	0
1969	32.8167	1	533	2	0	0	0	0	0	0	0	0
1970	32.8333	0	533	3	0	0	0	0	0	0	0	0
1971	32.85	0	533	3	0	0	0	0	0	0	0	0
1972	32.8667	0	533	3	0	0	0	0	0	0	0	0
1973	32.8833	0	533	3	0	0	0	0	0	0	0	0
1974	32.9	0	533	3	0	0	0	0	0	0	0	0
1975	32.9167	0	533	3	0	0	0	0	0	0	0	0
1976	32.9333	0	533	3	0	0	0	0	0	0	0	0
1977	32.95	0	533	3	0	0	0	0	0	0	0	0
1978	32.9667	0	533	3	0	0	0	0	0	0	0	0
1979	32.9833	0	533	3	0	0	0	0	0	0	0	0
1980	33	0	533	3	0	0	0	0	0	0	0	0
1981	33.0167	0	533	3	0	0	0	0	0	0	0	0
1982	33.0333	0	533	3	0	0	0	0	0	0	0	0
1983	33.05	0	533	3	0	0	0	0	0	0	0	0
1984	33.0667	0	533	3	0	0	0	0	0	0	0	0
1985	33.0833	1	533	2	0	0	0	0	0	0	0	0
1986	33.1	1	533	2	0	0	0	0	0	0	0	0
1987	33.1167	1	533	2	0	0	0	0	0	0	0	0
1988	33.1333	0	533	2	0	0	0	0	0	0	0	0
1989	33.15	0	533	2	0	0	0	0	0	0	0	0
1990	33.1667	0	533	2	0	0	0	0	0	0	0	0
1991	33.1833	0	533	2	0	0	0	0	0	0	0	0
1992	33.2	0	533	2	0	0	0	0	0	0	0	0
1993	33.2167	0	533	2	0	0	0	0	0	0	0	0
1994	33.2333	0	533	2	0	0	0	0	0	0	0	0
1995	33.25	0	533	2	0	0	0	0	0	0	0	0
1996	33.2667	0	533	2	0	0	0	0	0	0	0	0
1997	33.2833	0	533	2	0	0	0	0	0	0	0	0
1998	33.3	0	533	2	0	0	0	0	0	0	0	0
[truncated: 1,602 more rows]

## Sheet: GP15_5
Seconds	Minutes	Omobranchus anolius	Rhabdosargus sarba	Acanthopagrus australis	Omobranchus	Omobranchus rotundiceps	Cryptocentroides gobioides
0	0	0	0	0	0	0	0
1	0.0166667	0	0	0	0	0	0
2	0.0333333	0	0	0	0	0	0
3	0.05	0	0	0	0	0	0
4	0.0666667	0	0	0	0	0	0
5	0.0833333	0	0	0	0	0	0
6	0.1	0	0	0	0	0	0
7	0.116667	0	0	0	0	0	0
8	0.133333	0	0	0	0	0	0
9	0.15	0	0	0	0	0	0
10	0.166667	0	0	0	0	0	0
11	0.183333	0	0	0	0	0	0
12	0.2	0	0	0	0	0	0
13	0.216667	0	0	0	0	0	0
14	0.233333	1	0	0	0	0	0
15	0.25	1	0	0	0	0	0
16	0.266667	1	0	0	0	0	0
17	0.283333	1	0	0	0	0	0
18	0.3	0	0	0	0	0	0
19	0.316667	0	0	0	0	0	0
20	0.333333	0	0	0	0	0	0
21	0.35	0	0	0	0	0	0
22	0.366667	0	0	0	0	0	0
23	0.383333	0	0	0	0	0	0
24	0.4	0	0	0	0	0	0
25	0.416667	0	0	0	0	0	0
26	0.433333	0	0	0	0	0	0
27	0.45	0	0	0	0	0	0
28	0.466667	0	0	0	0	0	0
29	0.483333	0	0	0	0	0	0
30	0.5	0	0	0	0	0	0
31	0.516667	0	0	0	0	0	0
32	0.533333	0	0	0	0	0	0
33	0.55	0	0	0	0	0	0
34	0.566667	0	0	0	0	0	0
35	0.583333	0	0	0	0	0	0
36	0.6	0	0	0	0	0	0
37	0.616667	0	0	0	0	0	0
38	0.633333	0	0	0	0	0	0
39	0.65	0	0	0	0	0	0
40	0.666667	0	0	0	0	0	0
41	0.683333	0	0	0	0	0	0
42	0.7	0	0	0	0	0	0
43	0.716667	0	0	0	0	0	0
44	0.733333	0	0	0	0	0	0
45	0.75	0	0	0	0	0	0
46	0.766667	0	0	0	0	0	0
47	0.783333	0	0	0	0	0	0
48	0.8	0	0	0	0	0	0
49	0.816667	1	0	0	0	0	0
50	0.833333	1	0	0	0	0	0
51	0.85	1	0	0	0	0	0
52	0.866667	1	0	0	0	0	0
53	0.883333	1	0	0	0	0	0
54	0.9	1	0	0	0	0	0
55	0.916667	1	0	0	0	0	0
56	0.933333	1	0	0	0	0	0
57	0.95	1	0	0	0	0	0
58	0.966667	1	0	0	0	0	0
59	0.983333	1	0	0	0	0	0
60	1	1	0	0	0	0	0
61	1.01667	1	0	0	0	0	0
62	1.03333	1	0	0	0	0	0
63	1.05	1	0	0	0	0	0
64	1.06667	2	0	0	0	0	0
65	1.08333	2	0	0	0	0	0
66	1.1	2	0	0	0	0	0
67	1.11667	2	0	0	0	0	0
68	1.13333	2	0	0	0	0	0
69	1.15	1	0	0	0	0	0
70	1.16667	1	0	0	0	0	0
71	1.18333	1	0	0	0	0	0
72	1.2	1	0	0	0	0	0
73	1.21667	1	1	0	0	0	0
74	1.23333	1	1	0	0	0	0
75	1.25	1	1	0	0	0	0
76	1.26667	1	1	0	0	0	0
77	1.28333	1	1	0	0	0	0
78	1.3	1	1	0	0	0	0
79	1.31667	1	0	0	0	0	0
80	1.33333	1	0	0	0	0	0
81	1.35	1	0	0	0	0	0
82	1.36667	1	0	0	0	0	0
83	1.38333	1	0	0	0	0	0
84	1.4	1	0	0	0	0	0
85	1.41667	1	0	0	0	0	0
86	1.43333	1	0	0	0	0	0
87	1.45	1	0	0	0	0	0
88	1.46667	1	0	0	0	0	0
89	1.48333	1	0	0	0	0	0
90	1.5	1	0	0	0	0	0
91	1.51667	1	0	0	0	0	0
92	1.53333	1	0	0	0	0	0
93	1.55	1	0	0	0	0	0
94	1.56667	1	0	0	0	0	0
95	1.58333	1	0	0	0	0	0
96	1.6	1	0	0	0	0	0
97	1.61667	1	0	0	0	0	0
98	1.63333	1	0	0	0	0	0
99	1.65	1	0	0	0	0	0
100	1.66667	1	0	0	0	0	0
101	1.68333	1	0	0	0	0	0
102	1.7	1	0	0	0	0	0
103	1.71667	1	0	0	0	0	0
104	1.73333	1	0	0	0	0	0
105	1.75	1	0	0	0	0	0
106	1.76667	1	0	0	0	0	0
107	1.78333	1	0	0	0	0	0
108	1.8	1	0	0	0	0	0
109	1.81667	1	0	0	0	0	0
110	1.83333	1	0	0	0	0	0
111	1.85	1	0	0	0	0	0
112	1.86667	1	0	0	0	0	0
113	1.88333	1	0	0	0	0	0
114	1.9	1	0	0	0	0	0
115	1.91667	1	0	0	0	0	0
116	1.93333	1	0	0	0	0	0
117	1.95	0	0	0	0	0	0
118	1.96667	0	0	0	0	0	0
119	1.98333	1	0	0	0	0	0
120	2	1	0	0	0	0	0
121	2.01667	0	0	0	0	0	0
122	2.03333	0	0	0	0	0	0
123	2.05	0	0	0	0	0	0
124	2.06667	0	0	0	0	0	0
125	2.08333	0	0	0	0	0	0
126	2.1	0	0	0	0	0	0
127	2.11667	0	0	0	0	0	0
128	2.13333	0	0	0	0	0	0
129	2.15	0	0	0	0	0	0
130	2.16667	0	0	0	0	0	0
131	2.18333	0	0	0	0	0	0
132	2.2	0	0	0	0	0	0
133	2.21667	0	0	0	0	0	0
134	2.23333	0	0	0	0	0	0
135	2.25	0	0	0	0	0	0
136	2.26667	0	0	0	0	0	0
137	2.28333	0	0	0	0	0	0
138	2.3	0	0	0	0	0	0
139	2.31667	0	0	0	0	0	0
140	2.33333	0	0	0	0	0	0
141	2.35	0	0	0	0	0	0
142	2.36667	0	0	0	0	0	0
143	2.38333	0	0	0	0	0	0
144	2.4	0	0	0	0	0	0
145	2.41667	0	0	0	0	0	0
146	2.43333	0	0	0	0	0	0
147	2.45	0	0	0	0	0	0
148	2.46667	0	0	0	0	0	0
149	2.48333	1	0	0	0	0	0
150	2.5	1	0	0	0	0	0
151	2.51667	1	0	0	0	0	0
152	2.53333	1	0	0	0	0	0
153	2.55	1	0	0	0	0	0
154	2.56667	1	0	0	0	0	0
155	2.58333	1	0	0	0	0	0
156	2.6	1	0	0	0	0	0
157	2.61667	1	0	0	0	0	0
158	2.63333	1	0	0	0	0	0
159	2.65	1	0	0	0	0	0
160	2.66667	1	0	0	0	0	0
161	2.68333	1	0	0	0	0	0
162	2.7	0	0	0	0	0	0
163	2.71667	0	0	1	0	0	0
164	2.73333	0	0	1	0	0	0
165	2.75	0	0	1	0	0	0
166	2.76667	0	0	1	0	0	0
167	2.78333	0	0	0	0	0	0
168	2.8	0	0	0	0	0	0
169	2.81667	0	0	0	0	0	0
170	2.83333	0	0	0	0	0	0
171	2.85	0	0	0	0	0	0
172	2.86667	0	0	0	0	0	0
173	2.88333	2	0	0	0	0	0
174	2.9	2	0	0	0	0	0
175	2.91667	0	0	0	0	0	0
176	2.93333	2	0	1	0	0	0
177	2.95	2	0	1	0	0	0
178	2.96667	0	0	1	0	0	0
179	2.98333	0	0	1	0	0	0
180	3	0	0	0	0	0	0
181	3.01667	0	0	0	0	0	0
182	3.03333	0	0	0	0	0	0
183	3.05	0	0	0	0	0	0
184	3.06667	0	1	0	0	0	0
185	3.08333	0	1	0	0	0	0
186	3.1	0	1	0	0	0	0
187	3.11667	1	0	0	0	0	0
188	3.13333	1	0	0	0	0	0
189	3.15	0	0	0	0	0	0
190	3.16667	0	0	0	0	0	0
191	3.18333	0	0	0	0	0	0
192	3.2	0	0	0	0	0	0
193	3.21667	0	0	0	0	0	0
194	3.23333	0	0	1	0	0	0
195	3.25	0	0	1	0	0	0
196	3.26667	0	0	0	0	0	0
197	3.28333	1	0	0	0	0	0
198	3.3	1	0	0	0	0	0
199	3.31667	0	0	0	0	0	0
200	3.33333	0	2	0	0	0	0
201	3.35	0	2	0	0	0	0
202	3.36667	0	2	0	0	0	0
203	3.38333	1	2	1	0	0	0
204	3.4	1	2	1	0	0	0
205	3.41667	1	2	1	0	0	0
206	3.43333	1	2	1	0	0	0
207	3.45	1	2	0	0	0	0
208	3.46667	1	0	0	0	0	0
209	3.48333	1	0	0	0	0	0
210	3.5	1	0	0	0	0	0
211	3.51667	1	0	0	0	0	0
212	3.53333	1	0	0	0	0	0
213	3.55	1	0	0	0	0	0
214	3.56667	0	0	0	0	0	0
215	3.58333	0	0	0	0	0	0
216	3.6	0	0	0	0	0	0
217	3.61667	0	0	0	0	0	0
218	3.63333	0	0	0	0	0	0
219	3.65	0	0	0	0	0	0
220	3.66667	0	0	0	0	0	0
221	3.68333	0	0	0	0	0	0
222	3.7	0	0	0	0	0	0
223	3.71667	0	0	0	0	0	0
224	3.73333	0	0	0	0	0	0
225	3.75	0	0	0	0	0	0
226	3.76667	0	0	0	0	0	0
227	3.78333	0	0	0	0	0	0
228	3.8	0	0	0	0	0	0
229	3.81667	0	0	0	0	0	0
230	3.83333	0	0	0	0	0	0
231	3.85	0	0	0	0	0	0
232	3.86667	0	0	0	0	0	0
233	3.88333	2	0	1	0	0	0
234	3.9	2	0	1	0	0	0
235	3.91667	0	0	0	0	0	0
236	3.93333	1	0	0	0	0	0
237	3.95	1	0	0	0	0	0
238	3.96667	1	0	0	0	0	0
239	3.98333	1	0	0	0	0	0
240	4	1	0	0	0	0	0
241	4.01667	1	0	0	0	0	0
242	4.03333	1	0	0	0	0	0
243	4.05	1	0	0	0	0	0
244	4.06667	0	0	0	0	0	0
245	4.08333	0	0	0	0	0	0
246	4.1	0	0	0	0	0	0
247	4.11667	0	0	0	0	0	0
248	4.13333	0	0	0	0	0	0
249	4.15	0	0	0	0	0	0
250	4.16667	0	0	0	0	0	0
251	4.18333	0	0	0	0	0	0
252	4.2	0	0	0	0	0	0
253	4.21667	0	0	0	0	0	0
254	4.23333	0	0	0	0	0	0
255	4.25	0	0	0	0	0	0
256	4.26667	0	0	0	0	0	0
257	4.28333	0	0	0	0	0	0
258	4.3	0	0	0	0	0	0
259	4.31667	0	0	0	0	0	0
260	4.33333	0	0	0	0	0	0
261	4.35	0	0	0	0	0	0
262	4.36667	0	0	0	0	0	0
263	4.38333	0	0	0	0	0	0
264	4.4	0	0	0	0	0	0
265	4.41667	0	0	0	0	0	0
266	4.43333	2	0	0	0	0	0
267	4.45	2	0	0	0	0	0
268	4.46667	1	0	0	0	0	0
269	4.48333	1	0	0	0	0	0
270	4.5	1	0	0	0	0	0
271	4.51667	1	0	0	0	0	0
272	4.53333	1	0	0	0	0	0
273	4.55	1	0	0	0	0	0
274	4.56667	1	0	0	0	0	0
275	4.58333	1	0	0	0	0	0
276	4.6	0	0	0	0	0	0
277	4.61667	0	0	0	0	0	0
278	4.63333	0	0	0	0	0	0
279	4.65	0	0	0	0	0	0
280	4.66667	0	0	0	0	0	0
281	4.68333	0	0	0	0	0	0
282	4.7	0	0	0	0	0	0
283	4.71667	0	0	0	0	0	0
284	4.73333	0	0	0	0	0	0
285	4.75	0	0	0	0	0	0
286	4.76667	0	0	0	0	0	0
287	4.78333	0	0	0	0	0	0
288	4.8	0	0	0	0	0	0
289	4.81667	0	0	0	0	0	0
290	4.83333	0	0	0	0	0	0
291	4.85	0	0	0	0	0	0
292	4.86667	0	0	0	0	0	0
293	4.88333	0	0	0	0	0	0
294	4.9	0	0	0	0	0	0
295	4.91667	0	0	0	0	0	0
296	4.93333	0	0	0	0	0	0
297	4.95	0	0	0	0	0	0
298	4.96667	0	0	0	0	0	0
299	4.98333	0	0	0	0	0	0
300	5	0	0	0	0	0	0
301	5.01667	0	0	0	0	0	0
302	5.03333	0	0	0	0	0	0
303	5.05	0	0	0	0	0	0
304	5.06667	0	0	0	0	0	0
305	5.08333	0	0	0	0	0	0
306	5.1	0	0	0	0	0	0
307	5.11667	0	0	0	0	0	0
308	5.13333	0	0	0	0	0	0
309	5.15	0	0	0	0	0	0
310	5.16667	0	0	0	0	0	0
311	5.18333	0	0	0	0	0	0
312	5.2	0	0	0	0	0	0
313	5.21667	0	0	0	0	0	0
314	5.23333	0	0	0	0	0	0
315	5.25	0	0	0	0	0	0
316	5.26667	0	0	0	0	0	0
317	5.28333	0	0	0	0	0	0
318	5.3	0	0	0	0	0	0
319	5.31667	0	0	0	0	0	0
320	5.33333	0	0	0	0	0	0
321	5.35	0	0	0	0	0	0
322	5.36667	0	0	0	0	0	0
323	5.38333	0	0	0	0	0	0
324	5.4	0	0	0	0	0	0
325	5.41667	0	0	0	0	0	0
326	5.43333	0	0	0	0	0	0
327	5.45	0	0	0	0	0	0
328	5.46667	0	0	0	0	0	0
329	5.48333	0	0	0	0	0	0
330	5.5	0	0	0	0	0	0
331	5.51667	0	0	0	0	0	0
332	5.53333	0	0	0	0	0	0
333	5.55	0	0	0	0	0	0
334	5.56667	0	0	0	0	0	0
335	5.58333	0	0	0	0	0	0
336	5.6	0	0	0	0	0	0
337	5.61667	0	0	0	0	0	0
338	5.63333	0	0	0	0	0	0
339	5.65	0	0	0	0	0	0
340	5.66667	0	0	0	0	0	0
341	5.68333	0	0	0	0	0	0
342	5.7	0	0	0	0	0	0
343	5.71667	0	0	0	0	0	0
344	5.73333	0	0	0	0	0	0
345	5.75	0	0	0	0	0	0
346	5.76667	1	0	0	0	0	0
347	5.78333	1	0	0	0	0	0
348	5.8	1	0	0	0	0	0
349	5.81667	1	0	0	0	0	0
350	5.83333	1	0	0	0	0	0
351	5.85	1	0	0	0	0	0
352	5.86667	1	0	0	0	0	0
353	5.88333	1	0	0	0	0	0
354	5.9	1	0	0	0	0	0
355	5.91667	1	0	0	0	0	0
356	5.93333	1	0	0	0	0	0
357	5.95	1	0	0	0	0	0
358	5.96667	1	0	0	0	0	0
359	5.98333	1	0	0	0	0	0
360	6	1	0	0	0	0	0
361	6.01667	1	0	0	0	0	0
362	6.03333	1	0	0	0	0	0
363	6.05	0	0	0	0	0	0
364	6.06667	0	0	0	0	0	0
365	6.08333	0	0	0	0	0	0
366	6.1	0	0	0	0	0	0
367	6.11667	0	0	0	0	0	0
368	6.13333	0	0	0	0	0	0
369	6.15	0	0	0	0	0	0
370	6.16667	0	0	0	0	0	0
371	6.18333	0	0	0	0	0	0
372	6.2	0	0	0	0	0	0
373	6.21667	0	0	0	0	0	0
374	6.23333	0	0	0	0	0	0
375	6.25	0	0	0	0	0	0
376	6.26667	0	0	0	0	0	0
377	6.28333	0	1	0	0	0	0
378	6.3	0	1	0	0	0	0
379	6.31667	0	1	0	0	0	0
380	6.33333	0	1	0	0	0	0
381	6.35	0	0	0	0	0	0
382	6.36667	0	0	0	0	0	0
383	6.38333	0	0	0	0	0	0
384	6.4	0	0	0	0	0	0
385	6.41667	0	0	0	0	0	0
386	6.43333	0	0	0	0	0	0
387	6.45	0	0	0	0	0	0
388	6.46667	0	0	0	0	0	0
389	6.48333	0	0	0	0	0	0
390	6.5	0	0	0	0	0	0
391	6.51667	1	0	0	0	0	0
392	6.53333	1	0	0	0	0	0
393	6.55	0	0	0	0	0	0
394	6.56667	0	0	0	0	0	0
395	6.58333	0	0	0	0	0	0
396	6.6	0	0	0	0	0	0
397	6.61667	0	0	0	0	0	0
398	6.63333	0	0	0	0	0	0
399	6.65	0	0	0	0	0	0
400	6.66667	0	0	0	0	0	0
401	6.68333	0	0	0	0	0	0
402	6.7	0	0	0	0	0	0
403	6.71667	0	0	0	0	0	0
404	6.73333	0	0	0	0	0	0
405	6.75	0	0	0	0	0	0
406	6.76667	0	0	0	0	0	0
407	6.78333	0	0	0	0	0	0
408	6.8	0	0	0	0	0	0
409	6.81667	0	0	0	0	0	0
410	6.83333	0	0	0	0	0	0
411	6.85	0	0	0	0	0	0
412	6.86667	1	2	0	0	0	0
413	6.88333	1	2	0	0	0	0
414	6.9	1	2	0	0	0	0
415	6.91667	1	2	0	0	0	0
416	6.93333	1	2	0	0	0	0
417	6.95	1	2	0	0	0	0
418	6.96667	1	2	0	0	0	0
419	6.98333	1	0	0	0	0	0
420	7	1	0	0	0	0	0
421	7.01667	1	0	0	0	0	0
422	7.03333	1	0	0	0	0	0
423	7.05	1	0	0	0	0	0
424	7.06667	1	0	0	0	0	0
425	7.08333	1	0	0	0	0	0
426	7.1	1	0	0	0	0	0
427	7.11667	1	0	0	0	0	0
428	7.13333	1	0	0	0	0	0
429	7.15	1	0	0	0	0	0
430	7.16667	1	0	0	0	0	0
431	7.18333	1	0	0	0	0	0
432	7.2	1	0	0	0	0	0
433	7.21667	1	0	0	0	0	0
434	7.23333	1	0	0	0	0	0
435	7.25	0	0	0	0	0	0
436	7.26667	0	0	0	0	0	0
437	7.28333	0	0	0	0	0	0
438	7.3	0	0	0	0	0	0
439	7.31667	0	0	0	0	0	0
440	7.33333	0	0	0	0	0	0
441	7.35	0	0	0	0	0	0
442	7.36667	0	0	0	0	0	0
443	7.38333	0	0	0	0	0	0
444	7.4	0	0	0	0	0	0
445	7.41667	0	0	0	0	0	0
446	7.43333	0	0	0	0	0	0
447	7.45	0	0	0	0	0	0
448	7.46667	0	0	0	0	0	0
449	7.48333	0	0	0	0	0	0
450	7.5	0	0	0	0	0	0
451	7.51667	1	0	0	0	0	0
452	7.53333	1	0	0	0	0	0
453	7.55	1	0	0	0	0	0
454	7.56667	1	0	0	0	0	0
455	7.58333	1	0	0	0	0	0
456	7.6	1	0	0	0	0	0
457	7.61667	0	0	0	0	0	0
458	7.63333	0	0	0	0	0	0
459	7.65	0	0	0	0	0	0
460	7.66667	0	0	0	0	0	0
461	7.68333	0	0	0	0	0	0
462	7.7	0	0	0	0	0	0
463	7.71667	0	0	0	0	0	0
464	7.73333	0	0	0	0	0	0
465	7.75	0	0	0	0	0	0
466	7.76667	0	0	0	0	0	0
467	7.78333	0	0	0	0	0	0
468	7.8	0	0	0	0	0	0
469	7.81667	0	0	0	0	0	0
470	7.83333	0	0	0	0	0	0
471	7.85	0	0	0	0	0	0
472	7.86667	0	0	0	0	0	0
473	7.88333	1	0	0	0	0	0
474	7.9	1	0	0	0	0	0
475	7.91667	1	0	0	0	0	0
476	7.93333	1	0	0	0	0	0
477	7.95	1	0	0	0	0	0
478	7.96667	1	0	0	0	0	0
479	7.98333	1	0	0	0	0	0
480	8	1	0	0	0	0	0
481	8.01667	1	0	0	0	0	0
482	8.03333	1	0	0	0	0	0
483	8.05	1	0	0	0	0	0
484	8.06667	1	0	0	0	0	0
485	8.08333	1	0	0	0	0	0
486	8.1	1	0	0	0	0	0
487	8.11667	1	0	0	0	0	0
488	8.13333	1	0	0	0	0	0
489	8.15	1	0	0	0	0	0
490	8.16667	1	0	0	0	0	0
491	8.18333	1	0	0	0	0	0
492	8.2	1	0	0	0	0	0
493	8.21667	1	0	0	0	0	0
494	8.23333	1	0	0	0	0	0
495	8.25	1	0	0	0	0	0
496	8.26667	1	0	0	0	0	0
497	8.28333	1	0	0	0	0	0
498	8.3	1	0	0	0	0	0
499	8.31667	1	0	0	0	0	0
500	8.33333	1	0	0	0	0	0
501	8.35	1	0	0	0	0	0
502	8.36667	1	0	0	0	0	0
503	8.38333	1	0	0	0	0	0
504	8.4	1	0	0	0	0	0
505	8.41667	1	0	0	0	0	0
506	8.43333	1	0	0	0	0	0
507	8.45	1	0	0	0	0	0
508	8.46667	1	0	0	0	0	0
509	8.48333	1	0	0	0	0	0
510	8.5	1	0	0	0	0	0
511	8.51667	1	0	0	0	0	0
512	8.53333	1	0	0	0	0	0
513	8.55	1	0	0	0	0	0
514	8.56667	1	0	0	0	0	0
515	8.58333	1	0	0	0	0	0
516	8.6	1	0	0	0	0	0
517	8.61667	1	0	0	0	0	0
518	8.63333	1	0	0	0	0	0
519	8.65	1	0	0	0	0	0
520	8.66667	1	0	0	0	0	0
521	8.68333	2	0	0	0	0	0
522	8.7	2	0	0	0	0	0
523	8.71667	2	0	0	0	0	0
524	8.73333	2	0	0	0	0	0
525	8.75	2	0	0	0	0	0
526	8.76667	2	0	0	0	0	0
527	8.78333	2	0	0	0	0	0
528	8.8	2	0	0	0	0	0
529	8.81667	2	0	0	0	0	0
530	8.83333	2	0	0	0	0	0
531	8.85	2	0	0	0	0	0
532	8.86667	2	0	0	0	0	0
533	8.88333	2	0	0	0	0	0
534	8.9	2	0	0	0	0	0
535	8.91667	2	0	0	0	0	0
536	8.93333	2	0	0	0	0	0
537	8.95	2	0	0	0	0	0
538	8.96667	2	0	0	0	0	0
539	8.98333	2	0	0	0	0	0
540	9	1	0	0	0	0	0
541	9.01667	1	0	0	0	0	0
542	9.03333	1	0	0	2	0	0
543	9.05	1	0	0	2	0	0
544	9.06667	1	0	0	0	0	0
545	9.08333	1	0	0	0	0	0
546	9.1	1	0	0	0	0	0
547	9.11667	1	0	0	0	0	0
548	9.13333	1	0	0	0	0	0
549	9.15	1	0	0	0	0	0
550	9.16667	1	0	0	0	0	0
551	9.18333	1	0	0	0	0	0
552	9.2	1	0	0	0	0	0
553	9.21667	1	0	0	0	0	0
554	9.23333	1	0	0	0	0	0
555	9.25	1	0	0	0	0	0
556	9.26667	0	0	0	0	0	0
557	9.28333	0	0	0	0	0	0
558	9.3	0	0	0	0	0	0
559	9.31667	0	0	0	0	0	0
560	9.33333	0	0	0	0	0	0
561	9.35	0	0	0	0	0	0
562	9.36667	0	0	0	0	0	0
563	9.38333	0	0	0	0	0	0
564	9.4	0	0	0	0	0	0
565	9.41667	0	0	0	0	0	0
566	9.43333	1	0	0	0	0	0
567	9.45	1	0	0	0	0	0
568	9.46667	1	0	0	0	0	0
569	9.48333	1	0	0	0	0	0
570	9.5	1	0	0	0	0	0
571	9.51667	1	0	0	0	0	0
572	9.53333	1	0	0	0	0	0
573	9.55	1	0	0	0	0	0
574	9.56667	1	0	0	0	0	0
575	9.58333	1	0	0	0	0	0
576	9.6	1	0	0	0	0	0
577	9.61667	1	0	0	0	0	0
578	9.63333	1	0	0	0	0	0
579	9.65	1	0	0	0	0	0
580	9.66667	1	0	0	0	0	0
581	9.68333	1	0	0	0	0	0
582	9.7	1	0	0	0	0	0
583	9.71667	1	0	0	0	0	0
584	9.73333	1	0	0	0	0	0
585	9.75	1	0	0	0	0	0
586	9.76667	1	0	0	0	0	0
587	9.78333	1	0	0	0	0	0
588	9.8	1	0	0	0	0	0
589	9.81667	1	0	0	0	0	0
590	9.83333	1	0	0	0	0	0
591	9.85	1	0	0	0	0	0
592	9.86667	1	0	0	0	0	0
593	9.88333	1	0	0	0	0	0
594	9.9	1	0	0	0	0	0
595	9.91667	1	0	0	0	0	0
596	9.93333	1	0	0	0	0	0
597	9.95	1	0	0	0	0	0
598	9.96667	1	0	0	0	0	0
599	9.98333	1	0	0	0	0	0
600	10	1	0	0	0	0	0
601	10.0167	1	0	0	0	0	0
602	10.0333	1	0	0	0	0	0
603	10.05	1	0	0	0	0	0
604	10.0667	1	0	0	0	0	0
605	10.0833	0	0	0	0	0	0
606	10.1	0	0	0	0	0	0
607	10.1167	0	0	0	0	0	0
608	10.1333	0	0	0	0	0	0
609	10.15	0	0	0	0	0	0
610	10.1667	0	0	0	0	0	0
611	10.1833	0	0	0	0	0	0
612	10.2	0	0	0	0	0	0
613	10.2167	1	0	0	0	0	0
614	10.2333	1	0	0	0	0	0
615	10.25	1	0	0	0	0	0
616	10.2667	0	0	0	0	0	0
617	10.2833	0	0	0	0	0	0
618	10.3	0	0	0	0	0	0
619	10.3167	0	0	0	0	0	0
620	10.3333	0	0	0	0	0	0
621	10.35	0	0	0	0	0	0
622	10.3667	0	0	0	0	0	0
623	10.3833	0	0	0	0	0	0
624	10.4	0	0	0	0	0	0
625	10.4167	0	0	0	0	0	0
626	10.4333	0	0	0	0	0	0
627	10.45	0	0	0	0	0	0
628	10.4667	0	0	0	0	0	0
629	10.4833	0	0	0	0	0	0
630	10.5	0	0	0	0	0	0
631	10.5167	0	0	0	0	0	0
632	10.5333	0	0	0	0	0	0
633	10.55	0	0	0	0	0	0
634	10.5667	1	0	0	0	0	0
635	10.5833	1	0	0	0	0	0
636	10.6	0	0	0	0	0	0
637	10.6167	0	0	0	0	0	0
638	10.6333	0	0	0	0	0	0
639	10.65	0	0	0	0	0	0
640	10.6667	0	0	0	0	0	0
641	10.6833	0	0	0	0	0	0
642	10.7	0	0	0	0	0	0
643	10.7167	0	0	0	0	0	0
644	10.7333	0	0	0	0	0	0
645	10.75	0	0	0	0	0	0
646	10.7667	0	0	0	0	0	0
647	10.7833	0	0	0	0	0	0
648	10.8	0	0	0	0	0	0
649	10.8167	0	0	0	0	0	0
650	10.8333	0	0	0	0	0	0
651	10.85	0	0	0	0	0	0
652	10.8667	0	0	0	0	0	0
653	10.8833	0	0	0	0	0	0
654	10.9	0	0	0	0	0	0
655	10.9167	0	0	0	0	0	0
656	10.9333	0	0	0	0	0	0
657	10.95	0	0	0	0	0	0
658	10.9667	0	0	0	0	0	0
659	10.9833	0	0	0	0	0	0
660	11	0	0	0	0	0	0
661	11.0167	0	0	0	0	0	0
662	11.0333	0	0	0	0	0	0
663	11.05	0	0	0	0	0	0
664	11.0667	0	0	0	0	0	0
665	11.0833	0	0	0	0	0	0
666	11.1	0	0	0	0	0	0
667	11.1167	0	0	0	0	0	0
668	11.1333	0	0	0	0	0	0
669	11.15	0	0	0	0	0	0
670	11.1667	0	0	0	0	0	0
671	11.1833	0	0	0	0	0	0
672	11.2	0	0	0	0	0	0
673	11.2167	0	0	0	0	0	0
674	11.2333	0	0	0	0	0	0
675	11.25	0	0	0	0	0	0
676	11.2667	0	0	0	0	0	0
677	11.2833	0	0	0	0	0	0
678	11.3	0	0	0	0	0	0
679	11.3167	0	0	0	0	0	0
680	11.3333	0	0	0	0	0	0
681	11.35	0	0	0	0	0	0
682	11.3667	1	0	0	0	0	0
683	11.3833	1	0	0	0	0	0
684	11.4	1	0	0	0	0	0
685	11.4167	1	0	0	0	0	0
686	11.4333	1	0	0	0	0	0
687	11.45	1	0	0	0	0	0
688	11.4667	1	0	0	0	0	0
689	11.4833	1	0	0	0	0	0
690	11.5	1	0	0	0	0	0
691	11.5167	1	0	0	0	0	0
692	11.5333	1	0	0	0	0	0
693	11.55	1	0	0	0	0	0
694	11.5667	1	0	0	0	0	0
695	11.5833	1	0	0	0	0	0
696	11.6	1	0	0	0	0	0
697	11.6167	1	0	0	0	0	0
698	11.6333	2	0	0	0	0	0
699	11.65	2	0	0	0	0	0
700	11.6667	2	0	0	0	0	0
701	11.6833	2	0	0	0	0	0
702	11.7	2	0	0	0	0	0
703	11.7167	2	0	0	0	0	0
704	11.7333	2	0	0	0	0	0
705	11.75	2	0	0	0	0	0
706	11.7667	2	0	0	0	0	0
707	11.7833	2	0	0	0	0	0
708	11.8	2	0	0	0	0	0
709	11.8167	2	0	0	0	0	0
710	11.8333	2	0	0	0	0	0
711	11.85	2	0	0	0	0	0
712	11.8667	2	0	0	0	0	0
713	11.8833	2	0	0	0	0	0
714	11.9	2	0	0	0	0	0
715	11.9167	2	0	0	0	0	0
716	11.9333	2	0	0	0	0	0
717	11.95	2	0	0	0	0	0
718	11.9667	2	0	0	0	0	0
719	11.9833	2	0	0	0	0	0
720	12	2	0	0	0	0	0
721	12.0167	2	0	0	0	0	0
722	12.0333	2	0	0	0	0	0
723	12.05	2	0	0	0	0	0
724	12.0667	2	0	0	0	0	0
725	12.0833	2	0	0	0	0	0
726	12.1	2	0	0	0	0	0
727	12.1167	2	0	0	0	0	0
728	12.1333	2	0	0	0	0	0
729	12.15	2	0	0	0	0	0
730	12.1667	2	0	0	0	0	0
731	12.1833	2	0	0	0	0	0
732	12.2	2	0	0	0	0	0
733	12.2167	2	0	0	0	0	0
734	12.2333	2	0	0	0	0	0
735	12.25	2	0	0	0	0	0
736	12.2667	2	0	0	0	0	0
737	12.2833	2	0	0	0	0	0
738	12.3	2	0	0	0	0	0
739	12.3167	2	0	0	0	0	0
740	12.3333	2	0	0	0	0	0
741	12.35	2	0	0	0	0	0
742	12.3667	2	0	0	0	0	0
743	12.3833	1	0	0	0	0	0
744	12.4	1	0	0	0	0	0
745	12.4167	1	0	0	0	0	0
746	12.4333	1	0	0	0	0	0
747	12.45	1	0	0	0	0	0
748	12.4667	1	0	0	0	0	0
749	12.4833	1	0	0	0	0	0
750	12.5	1	0	0	0	0	0
751	12.5167	1	0	0	0	0	0
752	12.5333	1	0	0	0	0	0
753	12.55	1	0	0	0	0	0
754	12.5667	1	0	0	0	0	0
755	12.5833	1	0	0	0	0	0
756	12.6	1	0	0	0	0	0
757	12.6167	1	0	0	0	0	0
758	12.6333	2	0	0	0	0	0
759	12.65	2	0	0	0	0	0
760	12.6667	2	0	0	0	0	0
761	12.6833	2	0	0	0	0	0
762	12.7	2	0	0	0	0	0
763	12.7167	2	0	0	0	0	0
764	12.7333	2	0	0	0	0	0
765	12.75	2	0	0	0	0	0
766	12.7667	2	0	0	0	0	0
767	12.7833	2	0	0	0	0	0
768	12.8	2	0	0	0	0	0
769	12.8167	2	0	0	0	0	0
770	12.8333	2	0	0	0	0	0
771	12.85	2	0	0	0	0	0
772	12.8667	2	0	0	0	0	0
773	12.8833	2	0	0	0	0	0
774	12.9	2	0	0	0	0	0
775	12.9167	2	0	0	0	0	0
776	12.9333	2	0	0	0	0	0
777	12.95	2	0	0	0	0	0
778	12.9667	2	0	0	0	0	0
779	12.9833	2	0	0	0	0	0
780	13	2	0	0	0	0	0
781	13.0167	2	0	0	0	0	0
782	13.0333	2	0	0	0	0	0
783	13.05	2	0	0	0	0	0
784	13.0667	2	0	0	0	0	0
785	13.0833	2	0	0	0	0	0
786	13.1	2	0	0	0	0	0
787	13.1167	1	0	0	0	0	0
788	13.1333	1	1	1	0	0	0
789	13.15	1	1	1	0	0	0
790	13.1667	1	0	1	0	0	0
791	13.1833	1	0	1	0	0	0
792	13.2	1	0	1	0	0	0
793	13.2167	1	0	1	0	0	0
794	13.2333	1	0	1	0	0	0
795	13.25	1	0	1	0	0	0
796	13.2667	1	0	1	0	0	0
797	13.2833	1	0	1	0	0	0
798	13.3	1	0	1	0	0	0
799	13.3167	1	0	0	0	0	0
800	13.3333	1	0	0	0	0	0
801	13.35	1	0	0	0	0	0
802	13.3667	1	0	0	0	0	0
803	13.3833	1	0	0	0	0	0
804	13.4	1	0	0	0	0	0
805	13.4167	1	0	0	0	0	0
806	13.4333	1	0	0	0	0	0
807	13.45	1	0	0	0	0	0
808	13.4667	1	0	0	0	0	0
809	13.4833	2	0	0	0	0	0
810	13.5	2	0	0	0	0	0
811	13.5167	2	0	0	0	0	0
812	13.5333	2	0	0	0	0	0
813	13.55	2	0	0	0	0	0
814	13.5667	2	0	0	0	0	0
815	13.5833	2	0	0	0	0	0
816	13.6	2	0	0	0	0	0
817	13.6167	2	0	0	0	0	0
818	13.6333	2	0	0	0	0	0
819	13.65	2	0	0	0	0	0
820	13.6667	2	0	0	0	0	0
821	13.6833	2	0	0	0	0	0
822	13.7	2	0	0	0	0	0
823	13.7167	2	0	0	0	0	0
824	13.7333	1	0	0	0	0	0
825	13.75	1	0	0	0	0	0
826	13.7667	1	0	0	0	0	0
827	13.7833	1	0	0	0	0	0
828	13.8	1	0	0	0	0	0
829	13.8167	1	0	0	0	0	0
830	13.8333	1	0	0	0	0	0
831	13.85	1	0	0	0	0	0
832	13.8667	1	0	0	0	0	0
833	13.8833	1	0	0	0	0	0
834	13.9	1	0	0	0	0	0
835	13.9167	1	0	0	0	0	0
836	13.9333	1	0	0	0	0	0
837	13.95	1	0	0	0	0	0
838	13.9667	1	0	0	0	0	0
839	13.9833	1	0	0	0	0	0
840	14	1	0	0	0	0	0
841	14.0167	1	0	0	0	0	0
842	14.0333	1	0	0	0	0	0
843	14.05	1	0	0	0	0	0
844	14.0667	1	0	0	0	0	0
845	14.0833	1	0	0	0	0	0
846	14.1	1	0	0	0	0	0
847	14.1167	1	0	0	0	0	0
848	14.1333	1	0	0	0	0	0
849	14.15	1	0	0	0	0	0
850	14.1667	1	0	0	0	0	0
851	14.1833	1	0	0	0	0	0
852	14.2	1	0	0	0	0	0
853	14.2167	1	0	0	0	0	0
854	14.2333	1	0	0	0	0	0
855	14.25	1	0	0	0	0	0
856	14.2667	1	0	0	0	0	0
857	14.2833	1	0	0	0	0	0
858	14.3	1	0	0	0	0	0
859	14.3167	0	0	0	0	0	0
860	14.3333	0	0	0	0	0	0
861	14.35	0	0	0	0	0	0
862	14.3667	0	0	0	0	0	0
863	14.3833	0	0	0	0	0	0
864	14.4	0	0	0	0	0	0
865	14.4167	0	0	0	0	0	0
866	14.4333	0	0	0	0	0	0
867	14.45	0	0	0	0	0	0
868	14.4667	0	0	0	0	0	0
869	14.4833	0	0	0	0	0	0
870	14.5	0	0	0	0	0	0
871	14.5167	0	0	0	0	0	0
872	14.5333	0	0	0	0	0	0
873	14.55	0	0	0	0	0	0
874	14.5667	1	0	0	0	0	0
875	14.5833	1	0	0	0	0	0
876	14.6	1	0	0	0	0	0
877	14.6167	1	0	0	0	0	0
878	14.6333	1	0	0	0	0	0
879	14.65	1	0	0	0	0	0
880	14.6667	1	0	0	0	0	0
881	14.6833	1	0	0	0	0	0
882	14.7	1	0	0	0	0	0
883	14.7167	1	0	0	0	0	0
884	14.7333	0	0	0	0	0	0
885	14.75	0	0	0	0	0	0
886	14.7667	0	0	0	0	0	0
887	14.7833	0	0	0	0	0	0
888	14.8	0	0	0	0	0	0
889	14.8167	0	0	0	0	0	0
890	14.8333	0	0	0	0	0	0
891	14.85	0	0	0	0	0	0
892	14.8667	0	0	0	0	0	0
893	14.8833	0	0	0	0	0	0
894	14.9	0	0	0	0	0	0
895	14.9167	0	0	0	0	0	0
896	14.9333	0	0	0	0	0	0
897	14.95	0	0	0	0	0	0
898	14.9667	0	0	0	0	0	0
899	14.9833	0	0	0	0	0	0
900	15	0	0	0	0	0	0
901	15.0167	0	0	0	0	0	0
902	15.0333	0	0	0	0	0	0
903	15.05	0	0	0	0	0	0
904	15.0667	0	0	0	0	0	0
905	15.0833	0	0	0	0	0	0
906	15.1	0	0	0	0	0	0
907	15.1167	0	0	0	0	0	0
908	15.1333	0	0	0	0	0	0
909	15.15	0	0	0	0	0	0
910	15.1667	0	0	0	0	0	0
911	15.1833	0	0	0	0	0	0
912	15.2	0	0	0	0	0	0
913	15.2167	0	0	0	0	0	0
914	15.2333	0	0	0	0	0	0
915	15.25	0	0	0	0	0	0
916	15.2667	0	0	0	0	0	0
917	15.2833	0	0	0	0	0	0
918	15.3	0	0	0	0	0	0
919	15.3167	0	0	0	0	0	0
920	15.3333	0	0	0	0	0	0
921	15.35	0	0	0	0	0	0
922	15.3667	0	0	0	0	0	0
923	15.3833	0	0	0	0	0	0
924	15.4	0	0	0	0	0	0
925	15.4167	0	0	0	0	0	0
926	15.4333	0	0	0	0	0	0
927	15.45	0	0	0	0	0	0
928	15.4667	0	0	0	0	0	0
929	15.4833	0	0	0	0	0	0
930	15.5	0	0	0	0	0	0
931	15.5167	0	0	0	0	0	0
932	15.5333	0	0	0	0	0	0
933	15.55	0	0	0	0	0	0
934	15.5667	0	0	0	0	0	0
935	15.5833	0	0	0	0	0	0
936	15.6	0	0	0	0	0	0
937	15.6167	0	0	0	0	0	0
938	15.6333	0	0	0	0	0	0
939	15.65	0	0	0	0	0	0
940	15.6667	0	0	0	0	0	0
941	15.6833	0	0	0	0	0	0
942	15.7	0	0	0	0	0	0
943	15.7167	0	0	0	0	0	0
944	15.7333	0	0	0	0	0	0
945	15.75	0	0	0	0	0	0
946	15.7667	0	0	0	0	0	0
947	15.7833	0	0	0	0	0	0
948	15.8	0	0	0	0	0	0
949	15.8167	0	0	0	0	0	0
950	15.8333	0	0	0	0	0	0
951	15.85	0	0	0	0	0	0
952	15.8667	0	0	0	0	0	0
953	15.8833	0	0	0	0	0	0
954	15.9	0	0	0	0	0	0
955	15.9167	0	0	0	0	0	0
956	15.9333	0	0	0	0	0	0
957	15.95	0	0	0	0	0	0
958	15.9667	0	0	0	0	0	0
959	15.9833	0	0	0	0	0	0
960	16	0	0	0	0	0	0
961	16.0167	0	0	0	0	0	0
962	16.0333	0	0	0	0	0	0
963	16.05	0	0	0	0	0	0
964	16.0667	0	0	0	0	0	0
965	16.0833	0	0	0	0	0	0
966	16.1	0	0	0	0	0	0
967	16.1167	0	0	0	0	0	0
968	16.1333	1	0	0	0	0	0
969	16.15	1	0	0	0	0	0
970	16.1667	1	0	0	0	0	0
971	16.1833	1	0	0	0	0	0
972	16.2	0	0	0	0	0	0
973	16.2167	0	0	0	0	0	0
974	16.2333	0	0	0	0	0	0
975	16.25	0	0	0	0	0	0
976	16.2667	0	0	0	0	0	0
977	16.2833	0	0	0	0	0	0
978	16.3	0	0	0	0	0	0
979	16.3167	0	0	0	0	0	0
980	16.3333	0	0	0	0	0	0
981	16.35	0	0	0	0	0	0
982	16.3667	0	0	0	0	0	0
983	16.3833	0	0	0	0	0	0
984	16.4	0	0	0	0	0	0
985	16.4167	0	0	0	0	0	0
986	16.4333	0	0	0	0	0	0
987	16.45	0	0	0	0	0	0
988	16.4667	0	0	0	0	0	0
989	16.4833	0	0	0	0	0	0
990	16.5	0	0	0	0	0	0
991	16.5167	0	0	0	0	0	0
992	16.5333	0	0	0	0	0	0
993	16.55	0	0	0	0	0	0
994	16.5667	0	0	0	0	0	0
995	16.5833	0	0	0	0	0	0
996	16.6	0	0	0	0	0	0
997	16.6167	0	0	0	0	0	0
998	16.6333	0	0	0	0	0	0
999	16.65	0	0	0	0	0	0
1000	16.6667	0	0	0	0	0	0
1001	16.6833	0	0	0	0	0	0
1002	16.7	0	0	0	0	0	0
1003	16.7167	0	0	0	0	0	0
1004	16.7333	0	0	0	0	0	0
1005	16.75	0	0	0	0	0	0
1006	16.7667	0	0	0	0	0	0
1007	16.7833	0	0	0	0	0	0
1008	16.8	0	0	0	0	0	0
1009	16.8167	0	0	0	0	0	0
1010	16.8333	0	0	0	0	0	0
1011	16.85	0	0	0	0	0	0
1012	16.8667	0	0	0	0	0	0
1013	16.8833	0	0	0	0	0	0
1014	16.9	0	0	0	0	0	0
1015	16.9167	0	0	0	0	0	0
1016	16.9333	0	0	0	0	0	0
1017	16.95	0	0	0	0	0	0
1018	16.9667	0	0	0	0	0	0
1019	16.9833	0	0	0	0	0	0
1020	17	0	0	0	0	0	0
1021	17.0167	0	0	0	0	0	0
1022	17.0333	0	0	0	0	0	0
1023	17.05	0	0	0	0	0	0
1024	17.0667	0	0	0	0	0	0
1025	17.0833	0	0	0	0	0	0
1026	17.1	0	0	0	0	0	0
1027	17.1167	0	0	0	0	0	0
1028	17.1333	0	0	0	0	0	0
1029	17.15	0	0	0	0	0	0
1030	17.1667	0	0	0	0	0	0
1031	17.1833	0	0	0	0	0	0
1032	17.2	0	0	0	0	0	0
1033	17.2167	0	0	0	0	0	0
1034	17.2333	1	0	0	0	0	0
1035	17.25	1	0	0	0	0	0
1036	17.2667	1	0	0	0	0	0
1037	17.2833	1	0	0	0	0	0
1038	17.3	1	0	0	0	0	0
1039	17.3167	1	0	0	0	0	0
1040	17.3333	1	0	0	0	0	0
1041	17.35	1	0	0	0	0	0
1042	17.3667	1	0	0	0	0	0
1043	17.3833	2	0	0	0	0	0
1044	17.4	2	0	0	0	0	0
1045	17.4167	2	0	0	0	0	0
1046	17.4333	2	0	0	0	0	0
1047	17.45	2	0	0	0	0	0
1048	17.4667	2	0	0	0	0	0
1049	17.4833	1	0	0	0	0	0
1050	17.5	1	0	0	0	0	0
1051	17.5167	1	0	0	0	0	0
1052	17.5333	1	0	0	0	0	0
1053	17.55	1	0	0	0	0	0
1054	17.5667	3	0	0	0	0	0
1055	17.5833	3	0	0	0	0	0
1056	17.6	1	0	0	0	0	0
1057	17.6167	1	0	0	0	0	0
1058	17.6333	1	0	0	0	0	0
1059	17.65	1	0	0	0	0	0
1060	17.6667	1	0	0	0	0	0
1061	17.6833	1	0	0	0	0	0
1062	17.7	1	0	0	0	0	0
1063	17.7167	1	0	0	0	0	0
1064	17.7333	1	0	0	0	0	0
1065	17.75	1	0	0	0	0	0
1066	17.7667	1	0	0	0	0	0
1067	17.7833	1	0	0	0	0	0
1068	17.8	1	0	0	0	0	0
1069	17.8167	1	0	0	0	0	0
1070	17.8333	2	0	0	0	0	0
1071	17.85	2	0	0	0	0	0
1072	17.8667	3	0	0	0	0	0
1073	17.8833	3	0	0	0	0	0
1074	17.9	3	0	0	0	0	0
1075	17.9167	3	0	0	0	0	0
1076	17.9333	3	0	0	0	0	0
1077	17.95	3	0	0	0	0	0
1078	17.9667	3	0	0	0	0	0
1079	17.9833	4	0	0	0	0	0
1080	18	4	0	0	0	0	0
1081	18.0167	4	0	0	0	0	0
1082	18.0333	4	0	0	0	0	0
1083	18.05	4	0	0	0	0	0
1084	18.0667	4	0	0	0	0	0
1085	18.0833	4	0	0	0	0	0
1086	18.1	4	0	0	0	0	0
1087	18.1167	3	0	0	0	0	0
1088	18.1333	3	0	0	0	0	0
1089	18.15	3	0	0	0	0	0
1090	18.1667	3	0	0	0	0	0
1091	18.1833	3	0	0	0	0	0
1092	18.2	3	0	0	0	0	0
1093	18.2167	3	0	0	0	0	0
1094	18.2333	3	0	0	0	0	0
1095	18.25	3	0	0	0	0	0
1096	18.2667	3	0	0	0	0	0
1097	18.2833	2	0	0	0	0	0
1098	18.3	2	0	0	0	0	0
1099	18.3167	2	0	0	0	0	0
1100	18.3333	1	0	0	0	0	0
1101	18.35	1	0	0	0	0	0
1102	18.3667	1	0	0	0	0	0
1103	18.3833	0	0	0	0	0	0
1104	18.4	0	0	0	0	0	0
1105	18.4167	0	0	0	0	0	0
1106	18.4333	0	0	0	0	0	0
1107	18.45	0	0	0	0	0	0
1108	18.4667	0	0	0	0	0	0
1109	18.4833	0	0	0	0	0	0
1110	18.5	0	0	0	0	0	0
1111	18.5167	0	0	0	0	0	0
1112	18.5333	0	0	0	0	0	0
1113	18.55	0	0	0	0	0	0
1114	18.5667	0	0	0	0	0	0
1115	18.5833	0	0	0	0	0	0
1116	18.6	0	0	0	0	0	0
1117	18.6167	0	0	0	0	0	0
1118	18.6333	0	0	0	0	0	0
1119	18.65	0	0	0	0	0	0
1120	18.6667	0	0	0	0	0	0
1121	18.6833	0	0	0	0	0	0
1122	18.7	0	0	0	0	0	0
1123	18.7167	0	0	0	0	0	0
1124	18.7333	0	0	0	0	0	0
1125	18.75	0	0	0	0	0	0
1126	18.7667	0	0	0	0	0	0
1127	18.7833	0	0	0	0	0	0
1128	18.8	0	0	0	0	0	0
1129	18.8167	0	0	0	0	0	0
1130	18.8333	0	0	0	0	0	0
1131	18.85	0	0	0	0	0	0
1132	18.8667	0	0	0	0	0	0
1133	18.8833	0	0	0	0	0	0
1134	18.9	0	0	0	0	0	0
1135	18.9167	0	0	0	0	0	0
1136	18.9333	0	0	0	0	0	0
1137	18.95	0	0	0	0	0	0
1138	18.9667	0	0	0	0	0	0
1139	18.9833	0	0	0	0	0	0
1140	19	0	0	0	0	0	0
1141	19.0167	0	0	0	0	0	0
1142	19.0333	0	0	0	0	0	0
1143	19.05	0	0	0	0	0	0
1144	19.0667	0	0	0	0	0	0
1145	19.0833	0	0	0	0	0	0
1146	19.1	0	0	0	0	0	0
1147	19.1167	0	0	0	0	0	0
1148	19.1333	0	0	0	0	0	0
1149	19.15	0	0	0	0	0	0
1150	19.1667	0	0	0	0	0	0
1151	19.1833	0	0	0	0	0	0
1152	19.2	0	0	0	0	0	0
1153	19.2167	0	0	0	0	0	0
1154	19.2333	0	0	0	0	0	0
1155	19.25	0	0	0	0	0	0
1156	19.2667	0	0	0	0	0	0
1157	19.2833	0	0	0	0	0	0
1158	19.3	0	0	0	0	0	0
1159	19.3167	0	0	0	0	0	0
1160	19.3333	0	0	0	0	0	0
1161	19.35	0	0	0	0	0	0
1162	19.3667	0	0	0	0	0	0
1163	19.3833	0	0	0	0	0	0
1164	19.4	0	0	0	0	0	0
1165	19.4167	0	0	0	0	0	0
1166	19.4333	0	0	0	0	0	0
1167	19.45	0	0	0	0	0	0
1168	19.4667	0	0	0	0	0	0
1169	19.4833	0	0	0	0	0	0
1170	19.5	0	0	0	0	0	0
1171	19.5167	0	0	0	0	0	0
1172	19.5333	0	0	0	0	0	0
1173	19.55	0	0	0	0	0	0
1174	19.5667	0	0	0	0	0	0
1175	19.5833	0	0	0	0	0	0
1176	19.6	0	0	0	0	0	0
1177	19.6167	0	0	0	0	0	0
1178	19.6333	0	0	0	0	0	0
1179	19.65	0	0	0	0	0	0
1180	19.6667	1	0	0	0	0	0
1181	19.6833	1	0	0	0	0	0
1182	19.7	1	0	0	0	0	0
1183	19.7167	1	0	0	0	0	0
1184	19.7333	1	0	0	0	0	0
1185	19.75	1	0	0	0	0	0
1186	19.7667	1	0	0	0	0	0
1187	19.7833	1	0	0	0	0	0
1188	19.8	1	0	0	0	0	0
1189	19.8167	1	0	0	0	0	0
1190	19.8333	1	0	0	0	0	0
1191	19.85	1	0	0	0	0	0
1192	19.8667	1	0	0	0	0	0
1193	19.8833	1	0	0	0	0	0
1194	19.9	1	0	0	0	0	0
1195	19.9167	1	0	0	0	0	0
1196	19.9333	1	0	0	0	0	0
1197	19.95	1	0	0	0	0	0
1198	19.9667	1	0	0	0	0	0
1199	19.9833	1	0	0	0	0	0
1200	20	0	0	0	0	0	0
1201	20.0167	0	0	0	0	0	0
1202	20.0333	0	0	0	0	0	0
1203	20.05	0	0	0	0	0	0
1204	20.0667	0	0	0	0	0	0
1205	20.0833	0	0	0	0	0	0
1206	20.1	0	0	0	0	0	0
1207	20.1167	0	0	0	0	0	0
1208	20.1333	0	0	0	0	0	0
1209	20.15	0	0	0	0	0	0
1210	20.1667	0	0	0	0	0	0
1211	20.1833	0	0	0	0	0	0
1212	20.2	0	0	0	0	0	0
1213	20.2167	0	0	0	0	0	0
1214	20.2333	0	0	0	0	0	0
1215	20.25	0	0	0	0	0	0
1216	20.2667	0	0	0	0	0	0
1217	20.2833	0	0	0	0	0	0
1218	20.3	0	0	0	0	0	0
1219	20.3167	0	0	0	0	0	0
1220	20.3333	0	0	0	0	0	0
1221	20.35	0	0	0	0	0	0
1222	20.3667	0	0	0	0	0	0
1223	20.3833	0	0	0	0	0	0
1224	20.4	0	0	0	0	0	0
1225	20.4167	0	0	0	0	0	0
1226	20.4333	0	0	0	0	0	0
1227	20.45	0	0	0	0	0	0
1228	20.4667	0	0	0	0	0	0
1229	20.4833	0	0	0	0	0	0
1230	20.5	0	0	0	0	0	0
1231	20.5167	0	0	0	0	0	0
1232	20.5333	0	0	0	0	0	0
1233	20.55	0	0	0	0	0	0
1234	20.5667	0	0	0	0	0	0
1235	20.5833	0	0	0	0	0	0
1236	20.6	0	0	0	0	0	0
1237	20.6167	0	0	0	0	0	0
1238	20.6333	0	0	0	0	0	0
1239	20.65	0	0	0	0	0	0
1240	20.6667	0	0	0	0	0	0
1241	20.6833	0	0	0	0	0	0
1242	20.7	0	0	0	0	0	0
1243	20.7167	0	0	0	0	0	0
1244	20.7333	0	0	0	0	0	0
1245	20.75	0	0	0	0	0	0
1246	20.7667	0	0	0	0	0	0
1247	20.7833	0	0	0	0	0	0
1248	20.8	0	0	0	0	0	0
1249	20.8167	0	0	0	0	0	0
1250	20.8333	0	0	0	0	0	0
1251	20.85	0	0	0	0	0	0
1252	20.8667	0	0	0	0	0	0
1253	20.8833	1	0	0	0	0	0
1254	20.9	1	0	0	0	0	0
1255	20.9167	1	0	0	0	0	0
1256	20.9333	0	0	0	0	0	0
1257	20.95	0	0	0	0	0	0
1258	20.9667	0	0	0	0	0	0
1259	20.9833	0	0	0	0	0	0
1260	21	0	0	0	0	0	0
1261	21.0167	0	0	0	0	0	0
1262	21.0333	0	0	0	0	0	0
1263	21.05	0	0	0	0	0	0
1264	21.0667	0	0	0	0	0	0
1265	21.0833	0	0	0	0	0	0
1266	21.1	0	0	0	0	0	0
1267	21.1167	0	0	0	0	0	0
1268	21.1333	0	0	0	0	0	0
1269	21.15	0	0	0	0	0	0
1270	21.1667	0	0	0	0	0	0
1271	21.1833	0	0	0	0	0	0
1272	21.2	0	0	0	0	0	0
1273	21.2167	0	0	0	0	0	0
1274	21.2333	0	0	0	0	0	0
1275	21.25	0	0	0	0	0	0
1276	21.2667	0	0	0	0	0	0
1277	21.2833	0	0	0	0	0	0
1278	21.3	0	0	0	0	0	0
1279	21.3167	0	0	0	0	0	0
1280	21.3333	0	0	0	0	0	0
1281	21.35	0	0	0	0	0	0
1282	21.3667	0	0	0	0	0	0
1283	21.3833	0	0	0	0	0	0
1284	21.4	0	0	0	0	0	0
1285	21.4167	0	0	0	0	0	0
1286	21.4333	0	0	0	0	0	0
1287	21.45	0	0	0	0	0	0
1288	21.4667	1	0	0	0	0	0
1289	21.4833	1	0	0	0	0	0
1290	21.5	1	0	0	0	0	0
1291	21.5167	1	0	0	0	0	0
1292	21.5333	0	0	0	0	0	0
1293	21.55	0	0	0	0	0	0
1294	21.5667	0	0	0	0	0	0
1295	21.5833	0	0	0	0	0	0
1296	21.6	0	0	0	0	0	0
1297	21.6167	0	0	0	0	0	0
1298	21.6333	0	0	0	0	0	0
1299	21.65	0	0	0	0	0	0
1300	21.6667	0	0	0	0	0	0
1301	21.6833	0	0	0	0	0	0
1302	21.7	0	0	0	0	0	0
1303	21.7167	0	0	0	0	0	0
1304	21.7333	0	0	0	0	0	0
1305	21.75	0	0	0	0	0	0
1306	21.7667	0	0	0	0	0	0
1307	21.7833	0	0	0	0	0	0
1308	21.8	0	0	0	0	0	0
1309	21.8167	0	0	0	0	0	0
1310	21.8333	0	0	0	0	0	0
1311	21.85	0	0	0	0	0	0
1312	21.8667	0	0	0	0	0	0
1313	21.8833	0	0	0	0	0	0
1314	21.9	0	0	0	0	0	0
1315	21.9167	0	0	0	0	0	0
1316	21.9333	0	0	0	0	0	0
1317	21.95	0	0	0	0	0	0
1318	21.9667	0	0	0	0	0	0
1319	21.9833	0	0	0	0	0	0
1320	22	0	0	0	0	0	0
1321	22.0167	0	0	0	0	0	0
1322	22.0333	0	0	0	0	0	0
1323	22.05	0	0	0	0	0	0
1324	22.0667	0	0	0	0	0	0
1325	22.0833	0	0	0	0	0	0
1326	22.1	0	0	0	0	0	0
1327	22.1167	0	0	0	0	0	0
1328	22.1333	0	0	0	0	0	0
1329	22.15	0	0	0	0	0	0
1330	22.1667	0	0	0	0	0	0
1331	22.1833	1	0	0	0	0	0
1332	22.2	1	0	0	0	0	0
1333	22.2167	1	0	0	0	0	0
1334	22.2333	1	0	0	0	0	0
1335	22.25	0	0	0	0	0	0
1336	22.2667	0	0	0	0	0	0
1337	22.2833	1	0	0	0	0	0
1338	22.3	1	0	0	0	0	0
1339	22.3167	1	0	0	0	0	0
1340	22.3333	1	0	0	0	0	0
1341	22.35	1	0	0	0	0	0
1342	22.3667	0	0	0	0	0	0
1343	22.3833	0	0	0	0	0	0
1344	22.4	0	0	0	0	0	0
1345	22.4167	0	0	0	0	0	0
1346	22.4333	0	0	0	0	0	0
1347	22.45	0	0	0	0	0	0
1348	22.4667	0	0	0	0	0	0
1349	22.4833	1	0	0	0	0	0
1350	22.5	1	0	0	0	0	0
1351	22.5167	0	0	0	0	0	0
1352	22.5333	0	0	0	0	0	0
1353	22.55	0	0	0	0	0	0
1354	22.5667	0	0	0	0	0	0
1355	22.5833	0	0	0	0	0	0
1356	22.6	0	0	0	0	0	0
1357	22.6167	0	0	0	0	0	0
1358	22.6333	0	0	0	0	0	0
1359	22.65	0	0	0	0	0	0
1360	22.6667	0	0	0	0	0	0
1361	22.6833	0	0	0	0	0	0
1362	22.7	0	0	0	0	0	0
1363	22.7167	0	0	0	0	0	0
1364	22.7333	0	0	0	0	0	0
1365	22.75	0	0	0	0	0	0
1366	22.7667	0	0	0	0	0	0
1367	22.7833	0	0	0	0	0	0
1368	22.8	0	0	0	0	0	0
1369	22.8167	0	0	0	0	0	0
1370	22.8333	0	0	0	0	0	0
1371	22.85	0	0	0	0	0	0
1372	22.8667	0	0	0	0	0	0
1373	22.8833	0	0	0	0	0	0
1374	22.9	0	0	0	0	0	0
1375	22.9167	0	0	0	0	0	0
1376	22.9333	0	0	0	0	0	0
1377	22.95	0	0	0	0	0	0
1378	22.9667	0	0	0	0	0	0
1379	22.9833	0	0	0	0	0	0
1380	23	0	0	0	0	0	0
1381	23.0167	0	0	0	0	0	0
1382	23.0333	0	0	0	0	0	0
1383	23.05	0	0	0	0	0	0
1384	23.0667	0	0	0	0	0	0
1385	23.0833	0	0	0	0	0	0
1386	23.1	0	0	0	0	0	0
1387	23.1167	0	0	0	0	0	0
1388	23.1333	0	0	0	0	0	0
1389	23.15	0	0	0	0	0	0
1390	23.1667	0	0	0	0	0	0
1391	23.1833	0	0	0	0	0	0
1392	23.2	0	0	0	0	0	0
1393	23.2167	0	0	0	0	0	0
1394	23.2333	0	0	0	0	0	0
1395	23.25	0	0	0	0	0	0
1396	23.2667	0	0	0	0	0	0
1397	23.2833	0	0	0	0	0	0
1398	23.3	0	0	0	0	0	0
1399	23.3167	0	0	0	0	0	0
1400	23.3333	0	0	0	0	0	0
1401	23.35	0	0	0	0	0	0
1402	23.3667	0	0	0	0	0	0
1403	23.3833	0	0	0	0	0	0
1404	23.4	0	0	0	0	0	0
1405	23.4167	0	0	0	0	0	0
1406	23.4333	0	0	0	0	0	0
1407	23.45	0	0	0	0	0	0
1408	23.4667	0	0	0	0	0	0
1409	23.4833	0	0	0	0	0	0
1410	23.5	0	0	0	0	0	0
1411	23.5167	0	0	0	0	0	0
1412	23.5333	0	0	0	0	0	0
1413	23.55	0	0	0	0	0	0
1414	23.5667	0	0	0	0	0	0
1415	23.5833	0	0	0	0	0	0
1416	23.6	0	0	0	0	0	0
1417	23.6167	0	0	0	0	0	0
1418	23.6333	0	0	0	0	0	0
1419	23.65	0	0	0	0	0	0
1420	23.6667	0	0	0	0	0	0
1421	23.6833	0	0	0	0	0	0
1422	23.7	0	0	0	0	0	0
1423	23.7167	0	0	0	0	0	0
1424	23.7333	0	0	0	0	0	0
1425	23.75	0	0	0	0	0	0
1426	23.7667	0	0	0	0	0	0
1427	23.7833	0	0	0	0	0	0
1428	23.8	0	0	0	0	0	0
1429	23.8167	0	0	0	0	0	0
1430	23.8333	0	0	0	0	0	0
1431	23.85	0	0	0	0	0	0
1432	23.8667	0	0	0	0	0	0
1433	23.8833	0	0	0	0	0	0
1434	23.9	0	0	0	0	0	0
1435	23.9167	0	0	0	0	0	0
1436	23.9333	0	0	0	0	0	0
1437	23.95	0	0	0	0	0	0
1438	23.9667	0	0	0	0	0	0
1439	23.9833	0	0	0	0	0	0
1440	24	0	0	0	0	0	0
1441	24.0167	0	0	0	0	0	0
1442	24.0333	0	0	0	0	0	0
1443	24.05	0	0	0	0	0	0
1444	24.0667	0	0	0	0	0	0
1445	24.0833	0	0	0	0	0	0
1446	24.1	0	0	0	0	0	0
1447	24.1167	0	0	0	0	0	0
1448	24.1333	0	0	0	0	0	0
1449	24.15	0	0	0	0	0	0
1450	24.1667	0	0	0	0	0	0
1451	24.1833	0	0	0	0	0	0
1452	24.2	0	0	0	0	0	0
1453	24.2167	0	0	0	0	0	0
1454	24.2333	0	0	0	0	0	0
1455	24.25	0	0	0	0	0	0
1456	24.2667	0	0	0	0	0	0
1457	24.2833	0	0	0	0	0	0
1458	24.3	0	0	0	0	0	0
1459	24.3167	0	0	0	0	0	0
1460	24.3333	0	0	0	0	0	0
1461	24.35	0	0	0	0	0	0
1462	24.3667	0	0	0	0	0	0
1463	24.3833	0	0	0	0	0	0
1464	24.4	0	0	0	0	0	0
1465	24.4167	0	0	0	0	0	0
1466	24.4333	0	0	0	0	0	0
1467	24.45	0	0	0	0	0	0
1468	24.4667	0	0	0	0	0	0
1469	24.4833	0	0	0	0	0	0
1470	24.5	0	0	0	0	0	0
1471	24.5167	1	0	0	0	0	0
1472	24.5333	1	0	0	0	0	0
1473	24.55	1	0	0	0	0	0
1474	24.5667	1	0	0	0	0	0
1475	24.5833	1	0	0	0	0	0
1476	24.6	1	0	0	0	0	0
1477	24.6167	1	0	0	0	0	0
1478	24.6333	1	1	0	0	0	0
1479	24.65	1	1	0	0	0	0
1480	24.6667	1	1	0	0	0	0
1481	24.6833	1	1	0	0	0	0
1482	24.7	1	1	0	0	0	0
1483	24.7167	1	0	0	0	0	0
1484	24.7333	1	0	0	0	0	0
1485	24.75	1	0	0	0	0	0
1486	24.7667	1	0	0	0	0	0
1487	24.7833	1	0	0	0	0	0
1488	24.8	0	0	0	0	0	0
1489	24.8167	0	0	0	0	0	0
1490	24.8333	0	0	0	0	0	0
1491	24.85	0	0	0	0	0	0
1492	24.8667	0	0	0	0	0	0
1493	24.8833	0	0	0	0	0	0
1494	24.9	0	0	0	0	0	0
1495	24.9167	0	0	0	0	0	0
1496	24.9333	0	0	0	0	0	0
1497	24.95	0	0	0	0	0	0
1498	24.9667	0	0	0	0	0	0
1499	24.9833	0	0	0	0	0	0
1500	25	0	0	0	0	0	0
1501	25.0167	0	0	0	0	0	0
1502	25.0333	0	0	0	0	0	0
1503	25.05	0	0	0	0	0	0
1504	25.0667	0	0	0	0	0	0
1505	25.0833	0	0	0	0	0	0
1506	25.1	0	0	0	0	0	0
1507	25.1167	0	0	0	0	0	0
1508	25.1333	0	0	0	0	0	0
1509	25.15	0	0	0	0	0	0
1510	25.1667	0	0	0	0	0	0
1511	25.1833	0	0	0	0	0	0
1512	25.2	0	0	0	0	0	0
1513	25.2167	0	0	0	0	0	0
1514	25.2333	0	0	0	0	0	0
1515	25.25	0	0	0	0	0	0
1516	25.2667	0	0	0	0	0	0
1517	25.2833	0	0	0	0	0	0
1518	25.3	0	0	0	0	0	0
1519	25.3167	0	0	0	0	0	0
1520	25.3333	0	0	0	0	0	0
1521	25.35	0	0	0	0	0	0
1522	25.3667	0	0	0	0	0	0
1523	25.3833	0	0	0	0	0	0
1524	25.4	0	0	0	0	0	0
1525	25.4167	0	0	0	0	0	0
1526	25.4333	0	0	0	0	0	0
1527	25.45	0	0	0	0	0	0
1528	25.4667	0	0	0	0	0	0
1529	25.4833	0	0	0	0	0	0
1530	25.5	0	0	0	0	0	0
1531	25.5167	0	0	0	0	0	0
1532	25.5333	0	0	0	0	0	0
1533	25.55	0	0	0	0	0	0
1534	25.5667	0	0	0	0	0	0
1535	25.5833	0	0	0	0	0	0
1536	25.6	0	0	0	0	0	0
1537	25.6167	0	0	0	0	0	0
1538	25.6333	0	0	0	0	0	0
1539	25.65	0	0	0	0	0	0
1540	25.6667	0	0	0	0	0	0
1541	25.6833	0	0	0	0	0	0
1542	25.7	0	0	0	0	0	0
1543	25.7167	0	0	0	0	0	0
1544	25.7333	0	0	0	0	0	0
1545	25.75	0	0	0	0	0	0
1546	25.7667	0	0	0	0	0	0
1547	25.7833	1	0	0	0	0	0
1548	25.8	1	0	0	0	0	0
1549	25.8167	1	0	0	0	0	0
1550	25.8333	1	0	0	0	0	0
1551	25.85	1	0	0	0	0	0
1552	25.8667	1	0	0	0	0	0
1553	25.8833	1	0	0	0	0	0
1554	25.9	0	0	0	0	0	0
1555	25.9167	0	0	0	0	0	0
1556	25.9333	0	0	0	0	0	0
1557	25.95	0	0	0	0	0	0
1558	25.9667	0	0	0	0	0	0
1559	25.9833	0	0	0	0	0	0
1560	26	0	0	0	0	0	0
1561	26.0167	0	0	0	0	0	0
1562	26.0333	0	0	0	0	0	0
1563	26.05	0	0	0	0	0	0
1564	26.0667	0	0	0	0	0	0
1565	26.0833	0	0	0	0	0	0
1566	26.1	0	0	0	0	0	0
1567	26.1167	1	0	0	0	0	0
1568	26.1333	1	0	0	0	0	0
1569	26.15	1	0	0	0	0	0
1570	26.1667	1	0	0	0	0	0
1571	26.1833	1	0	0	0	0	0
1572	26.2	1	0	0	0	0	0
1573	26.2167	1	0	0	0	0	0
1574	26.2333	1	0	0	0	0	0
1575	26.25	1	0	0	0	0	0
1576	26.2667	1	0	0	0	0	0
1577	26.2833	1	0	0	0	0	0
1578	26.3	1	0	0	0	0	0
1579	26.3167	1	0	0	0	0	0
1580	26.3333	1	0	0	0	0	0
1581	26.35	1	0	0	0	0	0
1582	26.3667	1	0	0	0	0	0
1583	26.3833	1	0	0	0	0	0
1584	26.4	1	0	0	0	0	0
1585	26.4167	1	0	0	0	0	0
1586	26.4333	1	0	0	0	0	0
1587	26.45	1	0	0	0	0	0
1588	26.4667	1	0	0	0	0	0
1589	26.4833	1	0	0	0	0	0
1590	26.5	1	0	0	0	0	0
1591	26.5167	1	0	0	0	0	0
1592	26.5333	1	0	0	0	0	0
1593	26.55	1	0	0	0	0	0
1594	26.5667	1	0	0	0	0	0
1595	26.5833	1	0	0	0	0	0
1596	26.6	1	0	0	0	0	0
1597	26.6167	1	0	0	0	0	0
1598	26.6333	1	0	0	0	0	0
1599	26.65	1	0	0	0	0	0
1600	26.6667	1	0	0	0	0	0
1601	26.6833	1	0	0	0	0	0
1602	26.7	1	0	0	0	0	0
1603	26.7167	1	0	0	0	0	0
1604	26.7333	1	0	0	0	0	0
1605	26.75	1	0	0	0	0	0
1606	26.7667	1	0	0	0	0	0
1607	26.7833	1	0	0	0	0	0
1608	26.8	1	0	0	0	0	0
1609	26.8167	1	0	0	0	0	0
1610	26.8333	1	0	0	0	0	0
1611	26.85	1	0	0	0	0	0
1612	26.8667	1	0	0	0	0	0
1613	26.8833	1	0	0	0	0	0
1614	26.9	1	0	0	0	0	0
1615	26.9167	1	0	0	0	0	0
1616	26.9333	1	0	0	0	0	0
1617	26.95	1	0	0	0	0	0
1618	26.9667	1	0	0	0	0	0
1619	26.9833	1	0	0	0	0	0
1620	27	1	0	0	0	0	0
1621	27.0167	1	0	0	0	0	0
1622	27.0333	1	0	0	0	0	0
1623	27.05	1	0	0	0	0	0
1624	27.0667	1	0	0	0	0	0
1625	27.0833	1	0	0	0	0	0
1626	27.1	1	0	0	0	0	0
1627	27.1167	1	0	0	0	0	0
1628	27.1333	2	0	0	0	0	0
1629	27.15	2	0	0	0	0	0
1630	27.1667	2	0	0	0	0	0
1631	27.1833	2	0	0	0	0	0
1632	27.2	2	0	0	0	0	0
1633	27.2167	2	0	0	0	0	0
1634	27.2333	2	0	0	0	0	0
1635	27.25	1	0	0	0	0	0
1636	27.2667	1	0	0	0	0	0
1637	27.2833	1	0	0	0	0	0
1638	27.3	1	0	0	0	0	0
1639	27.3167	1	0	0	0	0	0
1640	27.3333	1	0	0	0	0	0
1641	27.35	1	0	0	0	0	0
1642	27.3667	1	0	0	0	0	0
1643	27.3833	1	0	0	0	0	0
1644	27.4	1	0	0	0	0	0
1645	27.4167	1	0	0	0	0	0
1646	27.4333	1	0	0	0	0	0
1647	27.45	1	0	0	0	0	0
1648	27.4667	1	0	0	0	0	0
1649	27.4833	1	0	0	0	0	0
1650	27.5	1	0	0	0	0	0
1651	27.5167	1	0	0	0	0	0
1652	27.5333	1	0	0	0	0	0
1653	27.55	1	0	0	0	0	0
1654	27.5667	0	0	0	0	0	0
1655	27.5833	0	0	0	0	0	0
1656	27.6	0	0	0	0	0	0
1657	27.6167	0	0	0	0	0	0
1658	27.6333	0	0	0	0	0	0
1659	27.65	0	0	0	0	0	0
1660	27.6667	0	0	1	0	0	0
1661	27.6833	0	0	1	0	0	0
1662	27.7	0	0	1	0	0	0
1663	27.7167	0	0	1	0	0	0
1664	27.7333	0	0	0	0	0	0
1665	27.75	0	0	0	0	0	0
1666	27.7667	0	0	0	0	0	0
1667	27.7833	0	0	0	0	0	0
1668	27.8	0	0	0	0	0	0
1669	27.8167	0	0	0	0	0	0
1670	27.8333	0	0	0	0	0	0
1671	27.85	0	0	0	0	0	0
1672	27.8667	0	0	0	0	0	0
1673	27.8833	0	0	0	0	0	0
1674	27.9	0	0	0	0	0	0
1675	27.9167	0	0	0	0	0	0
1676	27.9333	0	0	0	0	0	0
1677	27.95	0	0	0	0	0	0
1678	27.9667	0	0	0	0	0	0
1679	27.9833	0	0	0	0	0	0
1680	28	0	0	0	0	0	0
1681	28.0167	0	0	0	0	0	0
1682	28.0333	0	0	0	0	0	0
1683	28.05	0	0	0	0	0	0
1684	28.0667	0	0	0	0	0	0
1685	28.0833	0	0	0	0	0	0
1686	28.1	0	0	0	0	0	0
1687	28.1167	0	0	0	0	0	0
1688	28.1333	1	0	0	0	0	0
1689	28.15	1	0	0	0	0	0
1690	28.1667	1	0	0	0	0	0
1691	28.1833	2	0	0	0	0	0
1692	28.2	2	0	0	0	0	0
1693	28.2167	2	0	0	0	0	0
1694	28.2333	2	0	0	0	0	0
1695	28.25	1	0	0	0	0	0
1696	28.2667	1	0	0	0	0	0
1697	28.2833	1	0	0	0	0	0
1698	28.3	1	0	0	0	0	0
1699	28.3167	1	0	0	0	0	0
1700	28.3333	1	0	0	0	0	0
1701	28.35	1	0	0	0	0	0
1702	28.3667	1	0	0	0	0	0
1703	28.3833	1	0	0	0	0	0
1704	28.4	1	0	0	0	0	0
1705	28.4167	1	0	0	0	0	0
1706	28.4333	0	0	0	0	0	0
1707	28.45	0	0	0	0	0	0
1708	28.4667	0	0	0	0	0	0
1709	28.4833	0	0	0	0	0	0
1710	28.5	0	0	0	0	0	0
1711	28.5167	0	0	0	0	0	0
1712	28.5333	0	0	0	0	0	0
1713	28.55	0	0	0	0	0	0
1714	28.5667	0	0	0	0	0	0
1715	28.5833	0	0	0	0	0	0
1716	28.6	0	0	0	0	0	0
1717	28.6167	0	0	0	0	0	0
1718	28.6333	0	1	0	0	0	0
1719	28.65	0	1	0	0	0	0
1720	28.6667	0	1	0	0	0	0
1721	28.6833	0	0	0	0	0	0
1722	28.7	0	0	0	0	0	0
1723	28.7167	0	0	0	0	0	0
1724	28.7333	0	0	0	0	0	0
1725	28.75	0	0	0	0	0	0
1726	28.7667	1	0	0	0	0	0
1727	28.7833	2	0	0	0	0	0
1728	28.8	1	0	0	0	0	0
1729	28.8167	1	0	0	0	0	0
1730	28.8333	1	0	0	0	0	0
1731	28.85	1	0	0	0	0	0
1732	28.8667	1	0	0	0	0	0
1733	28.8833	1	0	0	0	0	0
1734	28.9	1	0	0	0	0	0
1735	28.9167	2	0	0	0	0	0
1736	28.9333	2	0	0	0	0	0
1737	28.95	1	0	0	0	0	0
1738	28.9667	1	0	0	0	0	0
1739	28.9833	1	0	0	0	0	0
1740	29	1	0	0	0	0	0
1741	29.0167	1	0	0	0	0	0
1742	29.0333	1	0	0	0	0	0
1743	29.05	1	0	0	0	0	0
1744	29.0667	0	0	0	0	0	0
1745	29.0833	0	0	0	0	0	0
1746	29.1	0	0	0	0	0	0
1747	29.1167	0	0	0	0	0	0
1748	29.1333	0	0	0	0	0	0
1749	29.15	0	0	0	0	0	0
1750	29.1667	0	0	0	0	0	0
1751	29.1833	0	0	0	0	0	0
1752	29.2	0	0	0	0	0	0
1753	29.2167	0	0	0	0	0	0
1754	29.2333	0	0	0	0	0	0
1755	29.25	0	0	0	0	0	0
1756	29.2667	0	0	0	0	0	0
1757	29.2833	0	0	0	0	0	0
1758	29.3	0	0	0	0	0	0
1759	29.3167	0	0	0	0	0	0
1760	29.3333	0	0	0	0	0	0
1761	29.35	0	0	0	0	0	0
1762	29.3667	0	0	0	0	0	0
1763	29.3833	0	0	0	0	0	0
1764	29.4	0	0	0	0	0	0
1765	29.4167	0	0	0	0	0	0
1766	29.4333	0	0	0	0	0	0
1767	29.45	0	0	0	0	0	0
1768	29.4667	0	0	0	0	0	0
1769	29.4833	0	0	0	0	0	0
1770	29.5	0	0	0	0	0	0
1771	29.5167	0	0	0	0	0	0
1772	29.5333	0	0	0	0	0	0
1773	29.55	0	0	0	0	0	0
1774	29.5667	0	0	0	0	0	0
1775	29.5833	0	0	0	0	0	0
1776	29.6	0	0	0	0	0	0
1777	29.6167	0	0	0	0	0	0
1778	29.6333	0	0	0	0	0	0
1779	29.65	0	0	0	0	0	0
1780	29.6667	0	0	0	0	0	0
1781	29.6833	0	0	0	0	0	0
1782	29.7	0	0	0	0	0	0
1783	29.7167	0	0	0	0	0	0
1784	29.7333	0	0	0	0	0	0
1785	29.75	0	0	0	0	0	0
1786	29.7667	0	0	0	0	0	0
1787	29.7833	0	0	0	0	0	0
1788	29.8	0	0	0	0	0	0
1789	29.8167	0	0	0	0	0	0
1790	29.8333	0	0	0	0	0	0
1791	29.85	0	0	0	0	0	0
1792	29.8667	0	0	0	0	0	0
1793	29.8833	0	0	0	0	0	0
1794	29.9	0	0	0	0	0	0
1795	29.9167	1	0	0	0	0	0
1796	29.9333	1	0	0	0	0	0
1797	29.95	1	0	0	0	0	0
1798	29.9667	1	0	0	0	0	0
1799	29.9833	1	0	0	0	0	0
1800	30	1	0	0	0	0	0
1801	30.0167	1	0	0	0	0	0
1802	30.0333	1	0	0	0	0	0
1803	30.05	1	0	0	0	0	0
1804	30.0667	1	0	0	0	0	0
1805	30.0833	1	0	0	0	0	0
1806	30.1	1	0	0	0	0	0
1807	30.1167	1	0	0	0	0	0
1808	30.1333	1	0	0	0	0	0
1809	30.15	1	0	0	0	0	0
1810	30.1667	1	0	0	0	0	0
1811	30.1833	1	0	0	0	0	0
1812	30.2	1	0	0	0	0	0
1813	30.2167	1	0	0	0	0	0
1814	30.2333	0	0	0	0	0	0
1815	30.25	0	0	0	0	0	0
1816	30.2667	0	0	0	0	0	0
1817	30.2833	0	0	0	0	0	0
1818	30.3	0	0	0	0	0	0
1819	30.3167	0	0	0	0	0	0
1820	30.3333	0	0	0	0	0	0
1821	30.35	0	0	0	0	0	0
1822	30.3667	0	0	0	0	0	0
1823	30.3833	0	0	0	0	0	0
1824	30.4	0	0	0	0	0	0
1825	30.4167	0	0	0	0	0	0
1826	30.4333	0	0	0	0	0	0
1827	30.45	0	0	0	0	0	0
1828	30.4667	0	0	0	0	0	0
1829	30.4833	0	0	0	0	0	0
1830	30.5	0	0	0	0	0	0
1831	30.5167	1	0	0	0	0	0
1832	30.5333	1	0	0	0	0	0
1833	30.55	1	0	0	0	0	0
1834	30.5667	1	0	0	0	0	0
1835	30.5833	1	0	0	0	0	0
1836	30.6	1	0	0	0	0	0
1837	30.6167	1	0	0	0	0	0
1838	30.6333	1	0	0	0	0	0
1839	30.65	1	0	0	0	0	0
1840	30.6667	1	0	0	0	0	0
1841	30.6833	1	0	0	0	0	0
1842	30.7	1	0	0	0	0	0
1843	30.7167	1	0	0	0	0	0
1844	30.7333	0	0	0	0	0	0
1845	30.75	0	0	0	0	0	0
1846	30.7667	0	0	0	0	0	0
1847	30.7833	0	0	0	0	0	0
1848	30.8	0	0	0	0	0	0
1849	30.8167	0	0	0	0	0	0
1850	30.8333	0	0	0	0	0	0
1851	30.85	0	0	0	0	0	0
1852	30.8667	0	0	0	0	0	0
1853	30.8833	0	0	0	0	0	0
1854	30.9	0	0	0	0	0	0
1855	30.9167	0	0	0	0	0	0
1856	30.9333	0	0	0	0	0	0
1857	30.95	0	0	0	0	0	0
1858	30.9667	0	0	0	0	0	0
1859	30.9833	0	0	0	0	0	0
1860	31	0	0	0	0	0	0
1861	31.0167	0	0	0	0	0	0
1862	31.0333	0	0	0	0	0	0
1863	31.05	0	0	0	0	0	0
1864	31.0667	0	0	0	0	0	0
1865	31.0833	0	0	0	0	0	0
1866	31.1	0	0	0	0	0	0
1867	31.1167	0	0	0	0	0	0
1868	31.1333	0	0	0	0	0	0
1869	31.15	0	0	0	0	0	0
1870	31.1667	0	0	0	0	0	0
1871	31.1833	0	0	0	0	1	0
1872	31.2	0	0	0	0	1	0
1873	31.2167	0	0	0	0	1	0
1874	31.2333	0	0	0	0	1	0
1875	31.25	0	0	0	0	1	0
1876	31.2667	0	0	0	0	1	0
1877	31.2833	0	0	0	0	1	0
1878	31.3	0	0	0	0	1	0
1879	31.3167	0	0	0	0	1	0
1880	31.3333	0	0	0	0	1	0
1881	31.35	0	0	0	0	1	0
1882	31.3667	0	0	0	0	1	0
1883	31.3833	0	0	0	0	1	0
1884	31.4	0	0	0	0	1	0
1885	31.4167	0	0	0	0	1	0
1886	31.4333	0	0	0	0	1	0
1887	31.45	0	0	0	0	1	0
1888	31.4667	0	0	0	0	1	0
1889	31.4833	0	0	0	0	1	0
1890	31.5	0	0	0	0	1	0
1891	31.5167	0	0	0	0	1	0
1892	31.5333	0	0	0	0	1	0
1893	31.55	0	0	0	0	1	0
1894	31.5667	0	0	0	0	1	0
1895	31.5833	0	0	0	0	1	0
1896	31.6	0	0	0	0	1	0
1897	31.6167	0	0	0	0	1	0
1898	31.6333	0	0	0	0	1	0
1899	31.65	0	0	0	0	1	0
1900	31.6667	0	0	0	0	1	0
1901	31.6833	0	0	0	0	1	0
1902	31.7	0	0	0	0	1	0
1903	31.7167	1	0	0	0	1	0
1904	31.7333	1	0	0	0	1	0
1905	31.75	1	0	0	0	1	0
1906	31.7667	1	0	0	0	1	0
1907	31.7833	1	0	0	0	1	0
1908	31.8	1	0	0	0	1	0
1909	31.8167	1	0	0	0	1	0
1910	31.8333	1	0	0	0	1	0
1911	31.85	1	0	0	0	1	0
1912	31.8667	1	0	0	0	1	0
1913	31.8833	1	0	0	0	1	0
1914	31.9	1	0	0	0	1	0
1915	31.9167	1	0	0	0	1	0
1916	31.9333	1	0	0	0	1	0
1917	31.95	1	0	0	0	1	0
1918	31.9667	1	0	0	0	1	0
1919	31.9833	1	0	0	0	1	0
1920	32	1	0	0	0	1	0
1921	32.0167	1	0	0	0	0	0
1922	32.0333	1	0	0	0	0	0
1923	32.05	1	0	0	0	0	0
1924	32.0667	1	0	0	0	0	0
1925	32.0833	1	1	0	0	0	0
1926	32.1	1	1	0	0	0	0
1927	32.1167	1	1	0	0	0	0
1928	32.1333	1	1	0	0	0	0
1929	32.15	1	1	0	0	0	0
1930	32.1667	1	1	0	0	0	0
1931	32.1833	1	1	0	0	0	0
1932	32.2	1	1	0	0	0	0
1933	32.2167	1	0	0	0	0	0
1934	32.2333	1	0	0	0	0	0
1935	32.25	1	0	0	0	0	0
1936	32.2667	1	0	0	0	0	0
1937	32.2833	1	0	0	0	0	0
1938	32.3	1	0	0	0	0	0
1939	32.3167	1	0	0	0	0	0
1940	32.3333	1	0	0	0	0	0
1941	32.35	1	0	0	0	0	0
1942	32.3667	1	0	0	0	0	0
1943	32.3833	0	0	0	0	0	0
1944	32.4	0	0	0	0	0	0
1945	32.4167	0	0	0	0	0	0
1946	32.4333	0	0	0	0	0	0
1947	32.45	0	0	0	0	0	0
1948	32.4667	0	0	0	0	0	0
1949	32.4833	0	0	0	0	0	0
1950	32.5	0	0	0	0	0	0
1951	32.5167	0	0	0	0	0	0
1952	32.5333	0	0	0	0	0	0
1953	32.55	0	0	0	0	0	0
1954	32.5667	0	0	0	0	0	0
1955	32.5833	0	0	0	0	0	0
1956	32.6	0	0	0	0	0	0
1957	32.6167	0	0	0	0	0	0
1958	32.6333	0	0	0	0	0	0
1959	32.65	0	0	0	0	0	0
1960	32.6667	0	0	0	0	0	0
1961	32.6833	0	0	0	0	0	0
1962	32.7	0	0	0	0	0	0
1963	32.7167	0	0	0	0	0	0
1964	32.7333	0	0	0	0	0	0
1965	32.75	0	0	0	0	0	0
1966	32.7667	0	0	0	0	0	0
1967	32.7833	0	0	0	0	0	0
1968	32.8	0	0	0	0	0	0
1969	32.8167	0	0	0	0	0	0
1970	32.8333	0	0	0	0	0	0
1971	32.85	0	0	0	0	0	0
1972	32.8667	0	0	0	0	0	0
1973	32.8833	0	0	0	0	0	0
1974	32.9	0	0	0	0	0	0
1975	32.9167	0	0	0	0	0	0
1976	32.9333	0	0	0	0	0	0
1977	32.95	0	0	0	0	0	0
1978	32.9667	0	0	0	0	0	0
1979	32.9833	0	0	0	0	0	0
1980	33	0	0	0	0	0	0
1981	33.0167	0	0	0	0	0	0
1982	33.0333	0	0	0	0	0	0
1983	33.05	0	0	0	0	0	0
1984	33.0667	0	0	0	0	0	0
1985	33.0833	1	0	0	0	0	0
1986	33.1	1	0	0	0	0	0
1987	33.1167	0	0	0	0	0	0
1988	33.1333	0	0	0	0	0	0
1989	33.15	0	0	0	0	0	0
1990	33.1667	0	0	0	0	0	0
1991	33.1833	0	0	0	0	0	0
1992	33.2	0	0	0	0	0	0
1993	33.2167	0	0	0	0	0	0
1994	33.2333	0	0	0	0	0	0
1995	33.25	0	0	0	0	0	0
1996	33.2667	0	0	0	0	0	0
1997	33.2833	0	0	0	0	0	0
1998	33.3	0	0	0	0	0	0
[truncated: 1,603 more rows]

## Sheet: GP26_6
Seconds	Minutes	Omobranchus anolius	Acanthopagrus australis	Rhabdosargus sarba	Girella elevata	Tylosurus gavialoides	Acanthopagrus butcheri	Mugil cephalus
0	0	0	0	0	0	0	0	0
1	0.0166667	1	0	0	0	0	0	0
2	0.0333333	1	0	0	0	0	0	0
3	0.05	1	0	0	0	0	0	0
4	0.0666667	1	0	0	0	0	0	0
5	0.0833333	1	0	0	0	0	0	0
6	0.1	1	0	0	0	0	0	0
7	0.116667	1	0	0	0	0	0	0
8	0.133333	1	0	0	0	0	0	0
9	0.15	1	0	0	0	0	0	0
10	0.166667	1	0	0	0	0	0	0
11	0.183333	1	0	0	0	0	0	0
12	0.2	1	0	0	0	0	0	0
13	0.216667	1	0	0	0	0	0	0
14	0.233333	1	0	0	0	0	0	0
15	0.25	1	0	0	0	0	0	0
16	0.266667	1	0	0	0	0	0	0
17	0.283333	1	0	0	0	0	0	0
18	0.3	1	0	0	0	0	0	0
19	0.316667	1	0	0	0	0	0	0
20	0.333333	1	0	0	0	0	0	0
21	0.35	1	0	0	0	0	0	0
22	0.366667	1	0	0	0	0	0	0
23	0.383333	1	0	0	0	0	0	0
24	0.4	1	0	0	0	0	0	0
25	0.416667	1	0	0	0	0	0	0
26	0.433333	1	0	0	0	0	0	0
27	0.45	1	0	0	0	0	0	0
28	0.466667	1	0	0	0	0	0	0
29	0.483333	1	0	0	0	0	0	0
30	0.5	1	0	0	0	0	0	0
31	0.516667	1	0	0	0	0	0	0
32	0.533333	1	0	0	0	0	0	0
33	0.55	1	0	0	0	0	0	0
34	0.566667	1	0	0	0	0	0	0
35	0.583333	1	0	0	0	0	0	0
36	0.6	1	0	0	0	0	0	0
37	0.616667	1	0	0	0	0	0	0
38	0.633333	1	0	0	0	0	0	0
39	0.65	1	0	0	0	0	0	0
40	0.666667	1	0	0	0	0	0	0
41	0.683333	1	0	0	0	0	0	0
42	0.7	1	0	0	0	0	0	0
43	0.716667	1	0	0	0	0	0	0
44	0.733333	1	0	0	0	0	0	0
45	0.75	1	0	0	0	0	0	0
46	0.766667	0	0	0	0	0	0	0
47	0.783333	0	0	0	0	0	0	0
48	0.8	0	0	0	0	0	0	0
49	0.816667	0	0	0	0	0	0	0
50	0.833333	0	0	0	0	0	0	0
51	0.85	0	0	0	0	0	0	0
52	0.866667	0	4	0	0	0	0	0
53	0.883333	0	4	0	0	0	0	0
54	0.9	0	4	0	0	0	0	0
55	0.916667	0	4	0	0	0	0	0
56	0.933333	0	4	0	0	0	0	0
57	0.95	0	4	0	0	0	0	0
58	0.966667	0	4	0	0	0	0	0
59	0.983333	0	4	0	0	0	0	0
60	1	0	4	0	0	0	0	0
61	1.01667	0	4	0	0	0	0	0
62	1.03333	0	4	0	0	0	0	0
63	1.05	0	4	0	0	0	0	0
64	1.06667	0	4	0	0	0	0	0
65	1.08333	0	0	0	0	0	0	0
66	1.1	0	0	0	0	0	0	0
67	1.11667	0	0	0	0	0	0	0
68	1.13333	0	0	0	0	0	0	0
69	1.15	0	0	0	0	0	0	0
70	1.16667	0	0	0	0	0	0	0
71	1.18333	0	0	0	0	0	0	0
72	1.2	0	0	0	0	0	0	0
73	1.21667	0	0	0	0	0	0	0
74	1.23333	0	0	0	0	0	0	0
75	1.25	0	0	0	0	0	0	0
76	1.26667	0	0	0	0	0	0	0
77	1.28333	0	0	0	0	0	0	0
78	1.3	0	0	0	0	0	0	0
79	1.31667	0	0	0	0	0	0	0
80	1.33333	0	0	0	0	0	0	0
81	1.35	0	0	0	0	0	0	0
82	1.36667	0	0	0	0	0	0	0
83	1.38333	0	0	0	0	0	0	0
84	1.4	0	0	0	0	0	0	0
85	1.41667	0	0	0	0	0	0	0
86	1.43333	0	0	0	0	0	0	0
87	1.45	0	0	0	0	0	0	0
88	1.46667	0	0	0	0	0	0	0
89	1.48333	0	0	0	0	0	0	0
90	1.5	0	0	0	0	0	0	0
91	1.51667	0	0	0	0	0	0	0
92	1.53333	0	0	0	0	0	0	0
93	1.55	0	0	0	0	0	0	0
94	1.56667	0	0	0	0	0	0	0
95	1.58333	0	0	0	0	0	0	0
96	1.6	0	0	0	0	0	0	0
97	1.61667	0	0	0	0	0	0	0
98	1.63333	0	0	0	0	0	0	0
99	1.65	0	0	0	0	0	0	0
100	1.66667	0	0	0	0	0	0	0
101	1.68333	0	0	0	0	0	0	0
102	1.7	0	0	0	0	0	0	0
103	1.71667	0	0	0	0	0	0	0
104	1.73333	0	0	0	0	0	0	0
105	1.75	0	0	0	0	0	0	0
106	1.76667	0	0	0	0	0	0	0
107	1.78333	0	0	0	0	0	0	0
108	1.8	0	0	0	0	0	0	0
109	1.81667	0	0	0	0	0	0	0
110	1.83333	0	0	0	0	0	0	0
111	1.85	0	0	0	0	0	0	0
112	1.86667	0	0	0	0	0	0	0
113	1.88333	0	0	0	0	0	0	0
114	1.9	0	0	0	0	0	0	0
115	1.91667	0	0	0	0	0	0	0
116	1.93333	0	0	0	0	0	0	0
117	1.95	0	0	0	0	0	0	0
118	1.96667	0	0	0	0	0	0	0
119	1.98333	0	0	0	0	0	0	0
120	2	0	0	0	0	0	0	0
121	2.01667	0	0	0	0	0	0	0
122	2.03333	0	0	0	0	0	0	0
123	2.05	0	0	0	0	0	0	0
124	2.06667	0	0	0	0	0	0	0
125	2.08333	0	0	0	0	0	0	0
126	2.1	0	0	0	0	0	0	0
127	2.11667	0	0	0	0	0	0	0
128	2.13333	0	0	0	0	0	0	0
129	2.15	0	0	0	0	0	0	0
130	2.16667	0	0	0	0	0	0	0
131	2.18333	0	0	0	0	0	0	0
132	2.2	0	0	0	0	0	0	0
133	2.21667	0	0	0	0	0	0	0
134	2.23333	0	0	0	0	0	0	0
135	2.25	0	0	0	0	0	0	0
136	2.26667	0	0	0	0	0	0	0
137	2.28333	0	0	0	0	0	0	0
138	2.3	0	0	0	0	0	0	0
139	2.31667	0	0	0	0	0	0	0
140	2.33333	0	0	0	0	0	0	0
141	2.35	0	0	0	0	0	0	0
142	2.36667	0	0	0	0	0	0	0
143	2.38333	0	0	0	0	0	0	0
144	2.4	0	0	0	0	0	0	0
145	2.41667	0	0	0	0	0	0	0
146	2.43333	0	0	0	0	0	0	0
147	2.45	0	0	0	0	0	0	0
148	2.46667	0	0	0	0	0	0	0
149	2.48333	0	0	0	0	0	0	0
150	2.5	0	0	0	0	0	0	0
151	2.51667	0	0	0	0	0	0	0
152	2.53333	0	0	0	0	0	0	0
153	2.55	0	0	0	0	0	0	0
154	2.56667	0	0	0	0	0	0	0
155	2.58333	0	0	0	0	0	0	0
156	2.6	0	0	0	0	0	0	0
157	2.61667	0	0	0	0	0	0	0
158	2.63333	0	0	0	0	0	0	0
159	2.65	0	0	0	0	0	0	0
160	2.66667	0	0	0	0	0	0	0
161	2.68333	0	0	0	0	0	0	0
162	2.7	0	0	0	0	0	0	0
163	2.71667	0	0	0	0	0	0	0
164	2.73333	1	0	0	0	0	0	0
165	2.75	1	0	0	0	0	0	0
166	2.76667	1	0	0	0	0	0	0
167	2.78333	1	0	0	0	0	0	0
168	2.8	1	0	0	0	0	0	0
169	2.81667	1	0	0	0	0	0	0
170	2.83333	1	0	0	0	0	0	0
171	2.85	1	0	0	0	0	0	0
172	2.86667	1	0	0	0	0	0	0
173	2.88333	1	0	0	0	0	0	0
174	2.9	1	0	0	0	0	0	0
175	2.91667	1	0	0	0	0	0	0
176	2.93333	1	0	0	0	0	0	0
177	2.95	1	0	0	0	0	0	0
178	2.96667	1	0	0	0	0	0	0
179	2.98333	1	0	0	0	0	0	0
180	3	1	0	0	0	0	0	0
181	3.01667	1	0	0	0	0	0	0
182	3.03333	1	0	0	0	0	0	0
183	3.05	1	0	0	0	0	0	0
184	3.06667	1	0	0	0	0	0	0
185	3.08333	1	0	0	0	0	0	0
186	3.1	1	0	0	0	0	0	0
187	3.11667	1	0	0	0	0	0	0
188	3.13333	1	0	0	0	0	0	0
189	3.15	1	0	0	0	0	0	0
190	3.16667	1	0	0	0	0	0	0
191	3.18333	1	0	0	0	0	0	0
192	3.2	1	0	0	0	0	0	0
193	3.21667	1	0	0	0	0	0	0
194	3.23333	1	0	0	0	0	0	0
195	3.25	1	0	0	0	0	0	0
196	3.26667	1	0	0	0	0	0	0
197	3.28333	1	0	0	0	0	0	0
198	3.3	1	0	0	0	0	0	0
199	3.31667	1	0	0	0	0	0	0
200	3.33333	1	0	0	0	0	0	0
201	3.35	1	0	0	0	0	0	0
202	3.36667	1	0	0	0	0	0	0
203	3.38333	0	0	0	0	0	0	0
204	3.4	0	0	0	0	0	0	0
205	3.41667	0	0	0	0	0	0	0
206	3.43333	0	0	0	0	0	0	0
207	3.45	0	0	0	0	0	0	0
208	3.46667	0	0	0	0	0	0	0
209	3.48333	0	0	0	0	0	0	0
210	3.5	0	0	0	0	0	0	0
211	3.51667	0	0	0	0	0	0	0
212	3.53333	0	0	0	0	0	0	0
213	3.55	0	0	0	0	0	0	0
214	3.56667	0	0	0	0	0	0	0
215	3.58333	0	0	0	0	0	0	0
216	3.6	0	0	0	0	0	0	0
217	3.61667	0	0	0	0	0	0	0
218	3.63333	0	0	0	0	0	0	0
219	3.65	0	0	0	0	0	0	0
220	3.66667	0	0	0	0	0	0	0
221	3.68333	0	0	0	0	0	0	0
222	3.7	0	0	0	0	0	0	0
223	3.71667	0	0	0	0	0	0	0
224	3.73333	0	0	0	0	0	0	0
225	3.75	0	0	0	0	0	0	0
226	3.76667	0	0	0	0	0	0	0
227	3.78333	0	0	0	0	0	0	0
228	3.8	0	0	0	0	0	0	0
229	3.81667	0	0	0	0	0	0	0
230	3.83333	0	0	0	0	0	0	0
231	3.85	0	0	0	0	0	0	0
232	3.86667	0	0	0	0	0	0	0
233	3.88333	0	0	0	0	0	0	0
234	3.9	0	0	0	0	0	0	0
235	3.91667	0	0	0	0	0	0	0
236	3.93333	0	0	0	0	0	0	0
237	3.95	0	0	0	0	0	0	0
238	3.96667	0	0	0	0	0	0	0
239	3.98333	0	0	0	0	0	0	0
240	4	0	0	0	0	0	0	0
241	4.01667	0	0	0	0	0	0	0
242	4.03333	1	0	0	0	0	0	0
243	4.05	1	0	0	0	0	0	0
244	4.06667	1	0	0	0	0	0	0
245	4.08333	1	0	0	0	0	0	0
246	4.1	1	0	0	0	0	0	0
247	4.11667	1	0	0	0	0	0	0
248	4.13333	1	0	0	0	0	0	0
249	4.15	1	0	0	0	0	0	0
250	4.16667	1	0	0	0	0	0	0
251	4.18333	1	0	0	0	0	0	0
252	4.2	1	0	0	0	0	0	0
253	4.21667	1	0	0	0	0	0	0
254	4.23333	1	0	0	0	0	0	0
255	4.25	1	0	0	0	0	0	0
256	4.26667	1	0	0	0	0	0	0
257	4.28333	1	0	0	0	0	0	0
258	4.3	1	0	0	0	0	0	0
259	4.31667	1	0	0	0	0	0	0
260	4.33333	1	0	0	0	0	0	0
261	4.35	1	0	0	0	0	0	0
262	4.36667	1	0	0	0	0	0	0
263	4.38333	1	0	0	0	0	0	0
264	4.4	1	0	0	0	0	0	0
265	4.41667	1	0	0	0	0	0	0
266	4.43333	1	0	0	0	0	0	0
267	4.45	1	0	0	0	0	0	0
268	4.46667	1	0	0	0	0	0	0
269	4.48333	1	0	0	0	0	0	0
270	4.5	1	0	0	0	0	0	0
271	4.51667	1	0	0	0	0	0	0
272	4.53333	1	0	0	0	0	0	0
273	4.55	1	0	0	0	0	0	0
274	4.56667	1	0	0	0	0	0	0
275	4.58333	1	0	0	0	0	0	0
276	4.6	1	0	0	0	0	0	0
277	4.61667	1	0	0	0	0	0	0
278	4.63333	1	0	0	0	0	0	0
279	4.65	1	0	0	0	0	0	0
280	4.66667	1	0	0	0	0	0	0
281	4.68333	1	0	1	0	0	0	0
282	4.7	1	0	1	0	0	0	0
283	4.71667	1	0	1	0	0	0	0
284	4.73333	1	0	1	0	0	0	0
285	4.75	1	0	0	0	0	0	0
286	4.76667	1	0	0	0	0	0	0
287	4.78333	0	0	0	0	0	0	0
288	4.8	0	0	0	0	0	0	0
289	4.81667	0	0	0	0	0	0	0
290	4.83333	0	0	0	0	0	0	0
291	4.85	0	0	0	0	0	0	0
292	4.86667	0	0	0	0	0	0	0
293	4.88333	0	0	0	0	0	0	0
294	4.9	0	0	0	0	0	0	0
295	4.91667	0	0	0	0	0	0	0
296	4.93333	0	1	0	0	0	0	0
297	4.95	0	1	0	0	0	0	0
298	4.96667	0	1	0	0	0	0	0
299	4.98333	0	0	0	0	0	0	0
300	5	0	0	0	0	0	0	0
301	5.01667	0	0	0	0	0	0	0
302	5.03333	0	0	0	0	0	0	0
303	5.05	0	0	0	0	0	0	0
304	5.06667	0	0	0	0	0	0	0
305	5.08333	0	0	0	0	0	0	0
306	5.1	0	0	0	0	0	0	0
307	5.11667	0	0	0	0	0	0	0
308	5.13333	0	0	0	0	0	0	0
309	5.15	0	0	0	0	0	0	0
310	5.16667	0	0	0	0	0	0	0
311	5.18333	0	0	0	0	0	0	0
312	5.2	0	0	0	0	0	0	0
313	5.21667	0	0	0	0	0	0	0
314	5.23333	0	0	0	0	0	0	0
315	5.25	0	0	0	0	0	0	0
316	5.26667	0	0	0	0	0	0	0
317	5.28333	0	0	0	0	0	0	0
318	5.3	0	0	0	0	0	0	0
319	5.31667	0	0	0	0	0	0	0
320	5.33333	0	0	0	0	0	0	0
321	5.35	0	0	0	0	0	0	0
322	5.36667	0	0	0	0	0	0	0
323	5.38333	0	0	0	0	0	0	0
324	5.4	0	0	0	0	0	0	0
325	5.41667	0	0	0	0	0	0	0
326	5.43333	0	0	0	0	0	0	0
327	5.45	0	0	0	0	0	0	0
328	5.46667	0	0	0	0	0	0	0
329	5.48333	0	0	0	0	0	0	0
330	5.5	0	0	0	0	0	0	0
331	5.51667	0	0	0	0	0	0	0
332	5.53333	0	0	0	0	0	0	0
333	5.55	0	0	0	0	0	0	0
334	5.56667	0	0	0	0	0	0	0
335	5.58333	0	0	0	0	0	0	0
336	5.6	0	0	0	0	0	0	0
337	5.61667	0	0	0	0	0	0	0
338	5.63333	0	0	0	0	0	0	0
339	5.65	0	0	0	0	0	0	0
340	5.66667	0	0	0	0	0	0	0
341	5.68333	0	2	0	0	0	0	0
342	5.7	0	2	0	0	0	0	0
343	5.71667	0	2	0	0	0	0	0
344	5.73333	0	2	0	0	0	0	0
345	5.75	0	2	0	0	0	0	0
346	5.76667	0	2	0	0	0	0	0
347	5.78333	0	2	0	0	0	0	0
348	5.8	0	2	0	0	0	0	0
349	5.81667	0	2	0	0	0	0	0
350	5.83333	0	2	0	0	0	0	0
351	5.85	0	2	0	0	0	0	0
352	5.86667	0	2	0	0	0	0	0
353	5.88333	0	2	0	0	0	0	0
354	5.9	0	2	0	0	0	0	0
355	5.91667	0	2	0	0	0	0	0
356	5.93333	0	0	0	0	0	0	0
357	5.95	0	0	0	0	0	0	0
358	5.96667	0	0	0	0	0	0	0
359	5.98333	0	0	0	0	0	0	0
360	6	0	0	0	0	0	0	0
361	6.01667	0	0	0	0	0	0	0
362	6.03333	0	0	0	0	0	0	0
363	6.05	0	0	0	0	0	0	0
364	6.06667	0	2	0	0	0	0	0
365	6.08333	0	2	0	0	0	0	0
366	6.1	0	2	0	0	0	0	0
367	6.11667	0	2	0	0	0	0	0
368	6.13333	0	2	0	0	0	0	0
369	6.15	0	2	0	0	0	0	0
370	6.16667	0	2	0	0	0	0	0
371	6.18333	0	0	0	1	0	0	0
372	6.2	0	0	0	1	0	0	0
373	6.21667	0	0	0	0	0	0	0
374	6.23333	0	0	0	0	0	0	0
375	6.25	0	0	0	0	0	0	0
376	6.26667	0	0	0	0	0	0	0
377	6.28333	0	0	0	0	0	0	0
378	6.3	0	0	0	0	0	0	0
379	6.31667	0	0	0	0	0	0	0
380	6.33333	0	0	0	0	0	0	0
381	6.35	0	0	0	0	0	0	0
382	6.36667	0	0	0	0	0	0	0
383	6.38333	0	0	0	0	0	0	0
384	6.4	0	0	0	0	0	0	0
385	6.41667	0	1	0	0	0	0	0
386	6.43333	0	1	0	0	0	0	0
387	6.45	0	1	0	0	0	0	0
388	6.46667	0	0	0	0	0	0	0
389	6.48333	0	0	0	0	0	0	0
390	6.5	0	0	0	0	0	0	0
391	6.51667	0	0	0	0	0	0	0
392	6.53333	0	0	0	0	0	0	0
393	6.55	0	0	0	0	0	0	0
394	6.56667	0	0	0	0	0	0	0
395	6.58333	0	0	0	0	0	0	0
396	6.6	0	0	0	0	0	0	0
397	6.61667	0	0	0	0	0	0	0
398	6.63333	0	0	0	0	0	0	0
399	6.65	0	0	0	0	0	0	0
400	6.66667	0	0	0	0	0	0	0
401	6.68333	0	0	0	0	0	0	0
402	6.7	0	0	0	0	0	0	0
403	6.71667	0	0	0	0	0	0	0
404	6.73333	0	0	0	0	0	0	0
405	6.75	0	0	0	0	0	0	0
406	6.76667	0	0	0	0	0	0	0
407	6.78333	0	0	0	0	0	0	0
408	6.8	0	0	0	0	0	0	0
409	6.81667	0	0	0	0	0	0	0
410	6.83333	0	0	0	0	0	0	0
411	6.85	0	0	0	0	0	0	0
412	6.86667	0	0	0	0	0	0	0
413	6.88333	0	0	0	0	0	0	0
414	6.9	0	0	0	0	0	0	0
415	6.91667	0	0	0	0	0	0	0
416	6.93333	0	0	0	0	0	0	0
417	6.95	0	0	0	0	0	0	0
418	6.96667	0	1	0	0	0	0	0
419	6.98333	0	1	0	0	0	0	0
420	7	0	1	0	0	0	0	0
421	7.01667	0	0	0	0	0	0	0
422	7.03333	0	0	0	0	0	0	0
423	7.05	0	0	0	0	0	0	0
424	7.06667	0	3	0	0	0	0	0
425	7.08333	0	3	0	0	0	0	0
426	7.1	0	3	0	0	0	0	0
427	7.11667	0	3	0	0	0	0	0
428	7.13333	0	3	0	0	0	0	0
429	7.15	0	3	0	0	0	0	0
430	7.16667	0	3	0	0	0	0	0
431	7.18333	0	3	0	0	0	0	0
432	7.2	0	3	0	0	0	0	0
433	7.21667	0	3	0	0	0	0	0
434	7.23333	0	3	0	0	0	0	0
435	7.25	0	3	0	0	0	0	0
436	7.26667	0	3	0	0	0	0	0
437	7.28333	0	3	0	0	0	0	0
438	7.3	0	3	0	0	0	0	0
439	7.31667	0	0	0	0	0	0	0
440	7.33333	0	0	0	0	0	0	0
441	7.35	0	0	0	0	0	0	0
442	7.36667	0	0	0	0	0	0	0
443	7.38333	0	0	0	0	0	0	0
444	7.4	0	0	0	0	0	0	0
445	7.41667	0	0	1	0	0	0	0
446	7.43333	0	0	1	0	0	0	0
447	7.45	0	0	0	0	0	0	0
448	7.46667	0	0	0	0	0	0	0
449	7.48333	0	0	0	0	0	0	0
450	7.5	0	0	0	0	0	0	0
451	7.51667	0	2	0	0	0	0	0
452	7.53333	0	2	0	0	0	0	0
453	7.55	0	2	0	0	0	0	0
454	7.56667	0	2	0	0	0	0	0
455	7.58333	0	2	0	0	0	0	0
456	7.6	0	2	0	0	0	0	0
457	7.61667	0	2	0	0	0	0	0
458	7.63333	0	2	0	0	0	0	0
459	7.65	0	2	0	0	0	0	0
460	7.66667	0	2	0	0	0	0	0
461	7.68333	0	2	0	0	0	0	0
462	7.7	0	2	0	0	0	0	0
463	7.71667	0	2	0	0	0	0	0
464	7.73333	0	2	0	0	0	0	0
465	7.75	0	2	0	0	0	0	0
466	7.76667	0	2	0	0	0	0	0
467	7.78333	0	2	0	0	0	0	0
468	7.8	0	2	0	0	0	0	0
469	7.81667	0	2	0	0	0	0	0
470	7.83333	0	2	0	0	0	0	0
471	7.85	0	2	0	0	0	0	0
472	7.86667	0	2	0	0	0	0	0
473	7.88333	0	2	0	0	0	0	0
474	7.9	0	0	0	0	0	0	0
475	7.91667	0	0	0	0	0	0	0
476	7.93333	0	0	0	0	0	0	0
477	7.95	0	0	0	0	0	0	0
478	7.96667	0	0	0	0	0	0	0
479	7.98333	0	0	0	0	0	0	0
480	8	0	0	0	0	0	0	0
481	8.01667	0	1	1	0	0	0	0
482	8.03333	0	1	1	0	0	0	0
483	8.05	0	1	1	0	0	0	0
484	8.06667	0	1	1	0	0	0	0
485	8.08333	0	1	0	0	0	0	0
486	8.1	0	1	0	0	0	0	0
487	8.11667	0	1	0	0	0	0	0
488	8.13333	0	1	0	0	0	0	0
489	8.15	0	1	0	0	0	0	0
490	8.16667	0	1	0	0	0	0	0
491	8.18333	0	0	0	0	0	0	0
492	8.2	0	0	0	0	0	0	0
493	8.21667	0	0	0	0	0	0	0
494	8.23333	0	0	0	0	0	0	0
495	8.25	0	0	0	0	0	0	0
496	8.26667	0	0	0	0	0	0	0
497	8.28333	0	0	0	0	0	0	0
498	8.3	0	0	0	0	0	0	0
499	8.31667	0	0	0	0	0	0	0
500	8.33333	0	0	0	0	0	0	0
501	8.35	0	0	0	0	0	0	0
502	8.36667	0	0	0	0	0	0	0
503	8.38333	0	0	0	0	0	0	0
504	8.4	0	0	0	0	0	0	0
505	8.41667	0	0	0	0	0	0	0
506	8.43333	0	0	0	0	0	0	0
507	8.45	0	0	0	0	0	0	0
508	8.46667	0	0	0	0	0	0	0
509	8.48333	0	0	0	0	0	0	0
510	8.5	0	0	0	0	0	0	0
511	8.51667	0	0	0	0	0	0	0
512	8.53333	0	0	0	0	0	0	0
513	8.55	0	0	0	0	0	0	0
514	8.56667	0	0	0	0	0	0	0
515	8.58333	0	0	0	0	0	0	0
516	8.6	0	0	0	0	0	0	0
517	8.61667	0	0	0	0	0	0	0
518	8.63333	0	0	0	0	0	0	0
519	8.65	0	0	0	0	0	0	0
520	8.66667	0	0	0	0	0	0	0
521	8.68333	0	0	0	0	0	0	0
522	8.7	0	0	0	0	0	0	0
523	8.71667	0	0	0	0	0	0	0
524	8.73333	0	0	0	0	0	0	0
525	8.75	0	0	0	0	0	0	0
526	8.76667	0	0	0	0	0	0	0
527	8.78333	0	0	0	0	0	0	0
528	8.8	0	0	0	0	0	0	0
529	8.81667	0	0	0	0	0	0	0
530	8.83333	0	0	0	0	0	0	0
531	8.85	0	0	0	0	0	0	0
532	8.86667	0	0	0	0	0	0	0
533	8.88333	0	0	0	0	0	0	0
534	8.9	0	0	0	0	0	0	0
535	8.91667	0	0	0	0	0	0	0
536	8.93333	0	0	0	0	0	0	0
537	8.95	0	0	0	0	0	0	0
538	8.96667	0	1	0	0	0	0	0
539	8.98333	0	1	0	0	0	0	0
540	9	0	1	0	0	0	0	0
541	9.01667	0	1	0	0	0	0	0
542	9.03333	0	1	0	0	0	0	0
543	9.05	0	0	0	0	0	0	0
544	9.06667	0	0	0	0	0	0	0
545	9.08333	0	0	0	0	0	0	0
546	9.1	0	0	0	0	0	0	0
547	9.11667	0	0	0	0	0	0	0
548	9.13333	1	0	0	0	0	0	0
549	9.15	1	0	0	0	0	0	0
550	9.16667	1	0	0	0	0	0	0
551	9.18333	1	0	0	0	0	0	0
552	9.2	1	0	0	0	0	0	0
553	9.21667	1	0	0	0	0	0	0
554	9.23333	1	0	0	0	0	0	0
555	9.25	1	0	0	0	0	0	0
556	9.26667	1	0	0	0	0	0	0
557	9.28333	1	0	0	0	0	0	0
558	9.3	1	0	0	0	0	0	0
559	9.31667	1	0	0	0	0	0	0
560	9.33333	1	0	0	0	0	0	0
561	9.35	1	0	0	0	0	0	0
562	9.36667	1	0	0	0	0	0	0
563	9.38333	1	0	0	0	0	0	0
564	9.4	1	0	0	0	0	0	0
565	9.41667	1	0	0	0	0	0	0
566	9.43333	1	0	0	0	0	0	0
567	9.45	1	0	0	0	0	0	0
568	9.46667	1	0	0	0	0	0	0
569	9.48333	1	0	0	0	0	0	0
570	9.5	1	0	0	0	0	0	0
571	9.51667	1	0	0	0	0	0	0
572	9.53333	1	0	0	0	0	0	0
573	9.55	1	0	0	0	0	0	0
574	9.56667	1	0	0	0	0	0	0
575	9.58333	1	0	0	0	0	0	0
576	9.6	1	0	0	0	0	0	0
577	9.61667	1	0	0	0	0	0	0
578	9.63333	0	0	0	0	0	0	0
579	9.65	0	0	0	0	0	0	0
580	9.66667	0	0	0	0	0	0	0
581	9.68333	0	0	0	0	0	0	0
582	9.7	0	0	0	0	0	0	0
583	9.71667	0	0	0	0	0	0	0
584	9.73333	0	0	0	0	0	0	0
585	9.75	0	0	0	0	0	0	0
586	9.76667	0	0	0	0	0	0	0
587	9.78333	0	0	0	0	0	0	0
588	9.8	0	0	0	0	0	0	0
589	9.81667	0	0	0	0	0	0	0
590	9.83333	0	0	0	0	0	0	0
591	9.85	0	0	0	0	0	0	0
592	9.86667	0	0	0	0	0	0	0
593	9.88333	0	0	0	0	0	0	0
594	9.9	0	0	0	0	0	0	0
595	9.91667	0	0	0	0	0	0	0
596	9.93333	0	0	0	0	0	0	0
597	9.95	0	0	0	0	0	0	0
598	9.96667	0	0	0	0	0	0	0
599	9.98333	0	0	0	0	0	0	0
600	10	0	0	0	0	0	0	0
601	10.0167	0	0	0	0	0	0	0
602	10.0333	0	2	0	0	0	0	0
603	10.05	0	2	0	0	0	0	0
604	10.0667	0	2	0	0	0	0	0
605	10.0833	0	2	0	0	0	0	0
606	10.1	0	2	0	0	0	0	0
607	10.1167	0	2	0	0	0	0	0
608	10.1333	0	0	0	0	0	0	0
609	10.15	0	0	0	0	0	0	0
610	10.1667	0	0	0	0	0	0	0
611	10.1833	0	0	0	0	0	0	0
612	10.2	0	0	0	0	0	0	0
613	10.2167	0	0	0	0	0	0	0
614	10.2333	0	0	0	0	0	0	0
615	10.25	0	0	0	0	0	0	0
616	10.2667	0	1	0	0	0	0	0
617	10.2833	0	1	0	0	0	0	0
618	10.3	0	1	0	0	0	0	0
619	10.3167	0	1	0	0	1	0	0
620	10.3333	0	0	0	0	1	0	0
621	10.35	0	0	0	0	1	0	0
622	10.3667	0	0	0	0	0	0	0
623	10.3833	0	0	0	0	0	0	0
624	10.4	0	0	0	0	0	0	0
625	10.4167	0	0	0	0	0	0	0
626	10.4333	0	0	0	0	0	0	0
627	10.45	0	0	0	0	0	0	0
628	10.4667	0	0	0	0	0	0	0
629	10.4833	0	0	0	0	0	0	0
630	10.5	0	0	0	0	0	0	0
631	10.5167	0	1	0	0	0	0	0
632	10.5333	0	1	0	0	0	0	0
633	10.55	0	1	0	0	0	0	0
634	10.5667	0	0	0	0	0	0	0
635	10.5833	0	0	0	0	0	0	0
636	10.6	0	0	0	0	0	0	0
637	10.6167	0	0	0	0	0	0	0
638	10.6333	0	0	1	0	0	0	0
639	10.65	0	0	1	0	0	0	0
640	10.6667	0	0	1	0	0	0	0
641	10.6833	0	0	1	0	0	0	0
642	10.7	0	0	1	0	0	0	0
643	10.7167	0	0	1	0	0	0	0
644	10.7333	0	0	1	0	0	0	0
645	10.75	0	0	0	0	0	0	0
646	10.7667	0	0	0	0	0	0	0
647	10.7833	0	0	0	0	0	0	0
648	10.8	0	0	0	0	0	0	0
649	10.8167	0	0	0	0	0	0	0
650	10.8333	0	0	0	0	0	0	0
651	10.85	0	0	0	0	0	0	0
652	10.8667	0	0	0	0	0	0	0
653	10.8833	0	0	0	0	0	0	0
654	10.9	0	0	0	0	0	0	0
655	10.9167	0	0	0	0	0	0	0
656	10.9333	0	0	0	0	0	0	0
657	10.95	0	0	0	0	0	0	0
658	10.9667	0	0	0	0	0	0	0
659	10.9833	0	2	0	0	0	0	0
660	11	0	2	0	0	0	0	0
661	11.0167	0	2	0	0	0	0	0
662	11.0333	0	2	0	0	0	0	0
663	11.05	0	2	0	0	0	0	0
664	11.0667	0	2	0	0	0	0	0
665	11.0833	0	2	0	0	0	0	0
666	11.1	0	2	0	0	0	0	0
667	11.1167	0	1	0	0	0	0	0
668	11.1333	0	1	0	0	0	0	0
669	11.15	0	1	0	0	0	0	0
670	11.1667	0	1	0	0	0	0	0
671	11.1833	0	1	0	0	0	0	0
672	11.2	0	1	0	0	0	0	0
673	11.2167	0	1	0	0	0	0	0
674	11.2333	1	0	0	0	0	0	0
675	11.25	1	0	0	0	0	0	0
676	11.2667	1	0	0	0	0	0	0
677	11.2833	1	0	0	0	0	0	0
678	11.3	1	0	0	0	0	0	0
679	11.3167	1	0	0	0	0	0	0
680	11.3333	1	0	0	0	0	0	0
681	11.35	1	0	0	0	0	0	0
682	11.3667	1	0	0	0	0	0	0
683	11.3833	1	0	0	0	0	0	0
684	11.4	1	0	0	0	0	0	0
685	11.4167	1	0	0	0	0	0	0
686	11.4333	0	0	0	0	0	0	0
687	11.45	0	0	0	0	0	0	0
688	11.4667	0	0	0	0	0	0	0
689	11.4833	0	0	0	0	0	0	0
690	11.5	0	0	0	0	0	0	0
691	11.5167	0	0	0	0	0	0	0
692	11.5333	0	0	0	0	1	0	0
693	11.55	0	0	0	0	1	0	0
694	11.5667	0	0	0	0	1	0	0
695	11.5833	0	0	0	0	0	0	0
696	11.6	0	0	0	0	0	0	0
697	11.6167	0	0	0	0	0	0	0
698	11.6333	0	0	0	0	0	0	0
699	11.65	0	0	0	0	0	0	0
700	11.6667	0	0	0	0	0	0	0
701	11.6833	0	0	0	0	0	0	0
702	11.7	0	0	0	0	0	0	0
703	11.7167	0	0	0	0	0	0	0
704	11.7333	0	0	0	0	0	0	0
705	11.75	0	0	0	0	0	0	0
706	11.7667	0	0	0	0	0	0	0
707	11.7833	0	0	0	0	0	0	0
708	11.8	0	0	0	0	0	0	0
709	11.8167	0	0	0	0	1	1	0
710	11.8333	0	0	0	0	1	1	0
711	11.85	0	0	0	0	1	1	0
712	11.8667	0	0	0	0	0	0	0
713	11.8833	0	0	0	0	0	0	0
714	11.9	0	0	0	0	0	0	0
715	11.9167	0	0	0	0	0	0	1
716	11.9333	0	0	0	0	0	0	1
717	11.95	0	0	0	0	0	0	0
718	11.9667	0	0	0	0	0	0	0
719	11.9833	0	0	0	0	0	0	0
720	12	0	0	0	0	0	0	0
721	12.0167	0	0	0	0	0	0	0
722	12.0333	0	0	0	0	0	0	0
723	12.05	0	0	0	0	0	0	0
724	12.0667	0	0	0	0	0	0	0
725	12.0833	0	0	0	0	0	0	0
726	12.1	0	0	0	0	0	0	0
727	12.1167	0	0	0	0	0	0	0
728	12.1333	0	0	0	0	0	0	0
729	12.15	0	0	0	0	0	0	0
730	12.1667	0	0	0	0	0	0	0
731	12.1833	0	0	0	0	0	0	0
732	12.2	0	0	0	0	0	0	0
733	12.2167	0	0	0	0	0	0	0
734	12.2333	0	0	0	0	0	0	0
735	12.25	0	0	0	0	0	0	0
736	12.2667	0	0	0	0	0	0	0
737	12.2833	0	0	0	0	0	0	0
738	12.3	0	0	0	0	0	0	0
739	12.3167	0	0	0	0	0	0	0
740	12.3333	0	0	0	0	0	0	0
741	12.35	0	0	0	0	0	0	0
742	12.3667	0	0	0	0	0	0	0
743	12.3833	0	0	0	0	0	0	0
744	12.4	0	0	0	0	0	0	0
745	12.4167	0	0	0	0	0	0	0
746	12.4333	0	0	0	0	0	0	0
747	12.45	0	0	0	0	0	0	0
748	12.4667	0	0	0	0	0	0	0
749	12.4833	0	0	0	0	0	0	0
750	12.5	0	0	0	0	0	0	0
751	12.5167	0	1	0	0	0	0	0
752	12.5333	0	1	0	0	0	0	0
753	12.55	0	1	0	3	0	0	0
754	12.5667	0	0	0	3	0	0	0
755	12.5833	0	0	0	3	0	0	0
756	12.6	0	0	0	3	0	0	0
757	12.6167	0	0	0	3	0	0	0
758	12.6333	0	0	0	3	0	0	0
759	12.65	0	0	0	3	0	0	0
760	12.6667	0	0	0	0	0	0	0
761	12.6833	0	0	0	0	0	0	0
762	12.7	0	0	0	0	0	0	0
763	12.7167	0	0	0	0	0	0	0
764	12.7333	0	0	0	0	0	0	0
765	12.75	0	0	0	0	0	0	0
766	12.7667	0	0	0	0	0	0	0
767	12.7833	0	0	0	0	0	0	0
768	12.8	0	0	0	0	0	0	0
769	12.8167	0	0	0	0	0	0	0
770	12.8333	0	0	0	0	0	0	0
771	12.85	0	0	0	0	0	0	0
772	12.8667	0	0	0	0	0	0	0
773	12.8833	0	0	0	0	0	0	0
774	12.9	0	0	0	0	0	0	0
775	12.9167	0	0	0	0	0	0	0
776	12.9333	0	0	0	0	0	0	0
777	12.95	0	0	0	0	0	0	0
778	12.9667	0	0	0	0	0	0	0
779	12.9833	0	0	0	0	0	0	0
780	13	0	0	0	0	0	0	0
781	13.0167	0	0	0	0	0	0	0
782	13.0333	0	0	0	0	0	0	0
783	13.05	0	0	0	0	0	0	0
784	13.0667	0	0	0	0	0	0	0
785	13.0833	0	0	0	0	0	0	0
786	13.1	0	0	0	0	0	0	0
787	13.1167	0	0	0	0	0	0	0
788	13.1333	0	0	0	0	0	0	0
789	13.15	0	0	0	0	0	0	0
790	13.1667	0	0	0	0	0	0	0
791	13.1833	0	0	0	0	0	0	0
792	13.2	0	0	0	0	0	0	0
793	13.2167	0	0	0	0	0	0	0
794	13.2333	0	0	0	0	0	0	0
795	13.25	0	0	0	0	0	0	0
796	13.2667	0	0	0	0	0	0	0
797	13.2833	0	0	0	0	0	0	0
798	13.3	0	0	0	0	0	0	0
799	13.3167	0	0	0	0	0	0	0
800	13.3333	0	0	0	0	0	0	0
801	13.35	0	0	0	0	0	0	0
802	13.3667	0	0	0	0	0	0	0
803	13.3833	0	0	0	0	0	0	0
804	13.4	0	0	0	0	0	0	0
805	13.4167	0	0	0	0	0	0	0
806	13.4333	0	0	0	0	0	0	0
807	13.45	0	0	0	0	0	0	0
808	13.4667	0	0	0	0	0	0	0
809	13.4833	0	0	0	0	0	0	0
810	13.5	0	0	0	0	0	0	0
811	13.5167	0	0	0	0	0	0	0
812	13.5333	0	0	0	0	0	0	0
813	13.55	0	0	0	0	0	0	0
814	13.5667	0	0	0	0	0	0	0
815	13.5833	0	0	0	0	0	0	0
816	13.6	0	0	0	0	0	0	0
817	13.6167	0	0	0	0	0	0	0
818	13.6333	0	0	0	0	0	0	0
819	13.65	0	0	0	0	0	0	0
820	13.6667	0	0	0	0	0	0	0
821	13.6833	0	0	0	0	0	0	0
822	13.7	0	0	0	0	0	0	0
823	13.7167	0	0	0	0	0	0	0
824	13.7333	0	0	0	0	0	0	0
825	13.75	0	0	0	0	0	0	0
826	13.7667	0	0	0	0	0	0	0
827	13.7833	0	0	0	0	0	0	0
828	13.8	0	0	0	0	0	0	0
829	13.8167	0	0	0	0	0	0	0
830	13.8333	0	0	0	0	0	0	0
831	13.85	0	0	0	0	0	0	0
832	13.8667	0	0	0	0	0	0	0
833	13.8833	0	0	0	0	0	0	0
834	13.9	0	0	0	0	0	0	0
835	13.9167	0	0	0	0	0	0	0
836	13.9333	0	0	0	0	0	0	0
837	13.95	0	0	0	0	0	0	0
838	13.9667	0	0	0	0	0	0	0
839	13.9833	0	0	0	0	0	0	0
840	14	0	0	0	0	0	0	0
841	14.0167	0	0	0	0	0	0	0
842	14.0333	0	0	0	0	0	0	0
843	14.05	0	0	0	0	0	0	0
844	14.0667	0	0	0	0	0	0	0
845	14.0833	0	0	0	0	0	0	0
846	14.1	0	0	0	0	0	0	0
847	14.1167	0	0	0	0	0	0	0
848	14.1333	0	0	0	0	0	0	0
849	14.15	0	0	0	0	0	0	0
850	14.1667	0	0	0	0	0	0	0
851	14.1833	0	0	0	0	0	0	0
852	14.2	0	0	0	0	0	0	0
853	14.2167	0	0	0	0	0	0	0
854	14.2333	0	0	0	0	0	0	0
855	14.25	0	0	0	0	0	0	0
856	14.2667	0	0	0	0	0	0	0
857	14.2833	0	0	0	0	0	0	0
858	14.3	0	0	0	0	0	0	0
859	14.3167	0	0	0	0	0	0	0
860	14.3333	0	0	0	0	0	0	0
861	14.35	0	0	0	0	0	0	0
862	14.3667	0	0	0	0	0	0	0
863	14.3833	0	0	0	0	0	0	0
864	14.4	0	0	0	0	0	0	0
865	14.4167	0	0	0	0	0	0	0
866	14.4333	0	0	0	0	0	0	0
867	14.45	0	0	0	0	0	0	0
868	14.4667	0	0	0	0	0	0	0
869	14.4833	0	0	0	0	0	0	0
870	14.5	0	0	0	0	0	0	0
871	14.5167	0	0	0	0	0	0	0
872	14.5333	0	0	0	0	0	0	0
873	14.55	0	0	0	0	0	0	0
874	14.5667	0	0	0	0	0	0	0
875	14.5833	0	0	0	0	0	0	0
876	14.6	0	0	0	0	0	0	0
877	14.6167	0	0	0	0	0	0	0
878	14.6333	0	0	0	0	0	0	0
879	14.65	0	0	0	0	0	0	0
880	14.6667	0	0	0	0	0	0	0
881	14.6833	0	0	0	0	0	0	0
882	14.7	0	0	0	0	0	0	0
883	14.7167	0	0	0	0	0	0	0
884	14.7333	0	0	0	0	0	0	0
885	14.75	0	0	0	0	0	0	0
886	14.7667	0	0	0	0	0	0	0
887	14.7833	0	0	0	0	0	0	0
888	14.8	0	0	0	0	0	0	0
889	14.8167	0	0	0	0	0	0	0
890	14.8333	0	0	0	0	0	0	0
891	14.85	0	0	0	0	0	0	0
892	14.8667	0	0	0	0	0	0	0
893	14.8833	0	0	0	0	0	0	0
894	14.9	0	0	0	0	0	0	0
895	14.9167	0	0	0	0	0	0	0
896	14.9333	0	0	0	0	0	0	0
897	14.95	0	0	0	0	0	0	0
898	14.9667	0	0	0	0	0	0	0
899	14.9833	0	0	0	0	0	0	0
900	15	0	0	0	0	0	0	0
901	15.0167	0	0	0	0	0	0	0
902	15.0333	0	0	0	0	0	0	0
903	15.05	0	0	0	0	0	0	0
904	15.0667	0	0	0	0	0	0	0
905	15.0833	0	0	0	0	0	0	0
906	15.1	0	0	0	0	0	0	0
907	15.1167	0	0	0	0	0	0	0
908	15.1333	0	0	0	0	0	0	0
909	15.15	0	0	0	0	0	0	0
910	15.1667	0	0	0	0	0	0	0
911	15.1833	0	0	0	0	0	0	0
912	15.2	0	0	0	0	0	0	0
913	15.2167	0	0	0	0	0	0	0
914	15.2333	0	0	0	0	0	0	0
915	15.25	0	0	0	0	0	0	0
916	15.2667	0	0	0	0	0	0	0
917	15.2833	0	0	0	0	0	0	0
918	15.3	0	0	0	0	0	0	0
919	15.3167	0	0	0	0	0	0	0
920	15.3333	0	0	0	0	0	0	0
921	15.35	0	0	0	0	0	0	0
922	15.3667	0	0	0	0	0	0	0
923	15.3833	0	0	0	0	0	0	0
924	15.4	0	0	0	0	0	0	0
925	15.4167	0	0	0	0	0	0	0
926	15.4333	0	0	0	0	0	0	0
927	15.45	0	0	0	0	0	0	0
928	15.4667	0	0	0	0	0	0	0
929	15.4833	0	0	0	0	0	0	0
930	15.5	0	0	0	0	0	0	0
931	15.5167	0	0	0	0	0	0	0
932	15.5333	0	0	0	0	0	0	0
933	15.55	0	0	0	0	0	0	0
934	15.5667	0	0	0	0	0	0	0
935	15.5833	0	0	0	0	0	0	0
936	15.6	0	0	0	0	0	0	0
937	15.6167	0	0	0	0	0	0	0
938	15.6333	0	0	0	0	0	0	0
939	15.65	0	0	0	0	0	0	0
940	15.6667	0	0	0	0	0	0	0
941	15.6833	0	0	0	0	0	0	0
942	15.7	0	0	0	0	0	0	0
943	15.7167	0	0	0	0	0	0	0
944	15.7333	0	0	0	0	0	0	0
945	15.75	0	0	0	0	0	0	0
946	15.7667	0	0	0	0	0	0	0
947	15.7833	0	0	0	0	0	0	0
948	15.8	0	0	0	0	0	0	0
949	15.8167	0	0	0	0	0	0	0
950	15.8333	0	0	0	0	0	0	0
951	15.85	0	0	0	0	0	0	0
952	15.8667	0	0	0	0	0	0	0
953	15.8833	0	0	0	0	0	0	0
954	15.9	0	0	0	0	0	0	0
955	15.9167	0	0	0	0	0	0	0
956	15.9333	0	0	0	0	0	0	0
957	15.95	0	0	0	0	0	0	0
958	15.9667	0	0	0	0	0	0	0
959	15.9833	0	0	0	0	0	0	0
960	16	0	0	0	0	0	0	0
961	16.0167	0	0	0	0	0	0	0
962	16.0333	0	0	0	0	0	0	0
963	16.05	0	0	0	0	0	0	0
964	16.0667	0	0	0	0	0	0	0
965	16.0833	0	0	0	0	0	0	0
966	16.1	0	0	0	0	0	0	0
967	16.1167	0	0	0	0	0	0	0
968	16.1333	0	0	0	0	0	0	0
969	16.15	0	0	0	0	0	0	0
970	16.1667	0	0	0	0	0	0	0
971	16.1833	0	0	0	0	0	0	0
972	16.2	0	0	0	0	0	0	0
973	16.2167	0	0	0	0	0	0	0
974	16.2333	0	0	0	0	0	0	0
975	16.25	0	0	0	0	0	0	0
976	16.2667	0	0	0	0	0	0	0
977	16.2833	0	0	0	0	0	0	0
978	16.3	0	0	0	0	0	0	0
979	16.3167	0	0	0	0	0	0	0
980	16.3333	1	0	0	0	0	0	0
981	16.35	1	0	0	0	0	0	0
982	16.3667	1	0	0	0	0	0	0
983	16.3833	1	1	0	0	0	0	0
984	16.4	1	1	0	0	0	0	0
985	16.4167	1	1	0	0	0	0	0
986	16.4333	1	1	0	0	0	0	0
987	16.45	1	0	0	0	0	0	0
988	16.4667	1	0	0	0	0	0	0
989	16.4833	1	0	0	0	0	0	0
990	16.5	1	0	0	0	0	0	0
991	16.5167	1	0	0	0	0	0	0
992	16.5333	1	0	0	0	0	0	0
993	16.55	1	0	0	0	0	0	0
994	16.5667	1	0	0	0	0	0	0
995	16.5833	1	0	0	0	0	0	0
996	16.6	1	0	0	0	0	0	0
997	16.6167	1	0	0	0	0	0	0
998	16.6333	1	1	0	0	0	0	0
999	16.65	1	1	0	0	0	0	0
1000	16.6667	1	0	0	0	0	0	0
1001	16.6833	1	0	0	0	0	0	0
1002	16.7	1	0	0	0	0	0	0
1003	16.7167	1	0	0	0	0	0	0
1004	16.7333	1	0	0	0	0	0	0
1005	16.75	1	0	0	0	0	0	0
1006	16.7667	1	0	0	0	0	0	0
1007	16.7833	1	0	0	0	0	0	0
1008	16.8	1	0	0	0	0	0	0
1009	16.8167	1	0	0	0	0	0	0
1010	16.8333	1	0	0	0	0	0	0
1011	16.85	1	0	0	0	0	0	0
1012	16.8667	1	0	0	0	0	0	0
1013	16.8833	1	0	0	0	0	0	0
1014	16.9	1	0	0	0	0	0	0
1015	16.9167	1	0	0	0	0	0	0
1016	16.9333	1	0	0	0	0	0	0
1017	16.95	1	0	0	0	0	0	0
1018	16.9667	1	0	0	0	0	0	0
1019	16.9833	1	0	0	0	0	0	0
1020	17	1	0	0	0	0	0	0
1021	17.0167	1	0	0	0	0	0	0
1022	17.0333	1	0	0	0	0	0	0
1023	17.05	1	0	0	0	0	0	0
1024	17.0667	0	0	0	0	0	0	0
1025	17.0833	0	0	0	0	0	0	0
1026	17.1	0	0	0	0	0	0	0
1027	17.1167	0	0	1	0	0	0	0
1028	17.1333	0	0	1	0	0	0	0
1029	17.15	0	0	0	0	0	0	0
1030	17.1667	0	0	0	0	0	0	0
1031	17.1833	0	0	0	0	0	0	0
1032	17.2	0	0	0	0	0	0	0
1033	17.2167	0	0	0	0	0	0	0
1034	17.2333	0	0	0	0	0	0	0
1035	17.25	0	0	0	0	0	0	0
1036	17.2667	0	0	0	0	0	0	0
1037	17.2833	0	0	0	0	0	0	0
1038	17.3	0	0	0	0	0	0	0
1039	17.3167	0	0	0	0	0	0	0
1040	17.3333	0	0	0	0	0	0	0
1041	17.35	0	0	0	0	0	0	0
1042	17.3667	0	0	0	0	0	0	0
1043	17.3833	0	0	0	0	0	0	0
1044	17.4	0	0	0	0	0	0	0
1045	17.4167	0	0	0	0	0	0	0
1046	17.4333	0	0	0	0	0	0	0
1047	17.45	0	0	0	0	0	0	0
1048	17.4667	0	0	0	0	0	0	0
1049	17.4833	0	0	0	0	0	0	0
1050	17.5	0	0	0	0	0	0	0
1051	17.5167	0	0	0	0	0	0	0
1052	17.5333	0	0	0	0	0	0	0
1053	17.55	0	0	0	0	0	0	0
1054	17.5667	0	1	0	0	0	0	0
1055	17.5833	0	1	0	0	0	0	0
1056	17.6	0	1	0	0	0	0	0
1057	17.6167	0	1	0	0	0	0	0
1058	17.6333	0	1	0	0	0	0	0
1059	17.65	0	1	0	0	0	0	0
1060	17.6667	0	1	0	0	0	0	0
1061	17.6833	0	0	0	0	0	0	0
1062	17.7	0	0	0	0	0	0	0
1063	17.7167	0	0	0	0	0	0	0
1064	17.7333	0	1	0	0	0	0	0
1065	17.75	0	1	0	0	0	0	0
1066	17.7667	0	1	0	0	0	0	0
1067	17.7833	0	0	0	0	0	0	0
1068	17.8	0	0	0	0	0	0	0
1069	17.8167	0	0	0	0	0	0	0
1070	17.8333	0	0	0	0	0	0	0
1071	17.85	0	0	0	0	0	0	0
1072	17.8667	0	0	0	0	0	0	0
1073	17.8833	0	0	0	0	0	0	0
1074	17.9	0	0	0	0	0	0	0
1075	17.9167	0	0	0	0	0	0	0
1076	17.9333	0	0	0	0	0	0	0
1077	17.95	0	0	0	0	0	0	0
1078	17.9667	0	0	0	0	0	0	0
1079	17.9833	0	0	0	0	0	0	0
1080	18	0	0	0	0	0	0	0
1081	18.0167	0	0	0	0	0	0	0
1082	18.0333	0	0	0	0	0	0	0
1083	18.05	0	0	0	0	0	0	0
1084	18.0667	0	0	0	0	0	0	0
1085	18.0833	0	0	0	0	0	0	0
1086	18.1	0	0	0	0	0	0	0
1087	18.1167	0	0	0	0	0	0	0
1088	18.1333	0	0	0	0	0	0	0
1089	18.15	0	0	0	0	0	0	0
1090	18.1667	0	0	0	0	0	0	0
1091	18.1833	0	0	0	0	0	0	0
1092	18.2	0	0	0	0	0	0	0
1093	18.2167	0	0	0	0	0	0	0
1094	18.2333	0	0	0	0	0	0	0
1095	18.25	0	0	0	0	0	0	0
1096	18.2667	0	0	0	0	0	0	0
1097	18.2833	0	0	0	0	0	0	0
1098	18.3	0	0	0	0	0	0	0
1099	18.3167	0	0	0	0	0	0	0
1100	18.3333	0	0	0	0	0	0	0
1101	18.35	0	0	0	0	0	0	0
1102	18.3667	0	0	0	0	0	0	0
1103	18.3833	0	0	0	0	0	0	0
1104	18.4	0	0	0	0	0	0	0
1105	18.4167	0	0	0	0	0	0	0
1106	18.4333	0	0	0	0	0	0	0
1107	18.45	0	0	0	0	0	0	0
1108	18.4667	0	0	0	0	0	0	0
1109	18.4833	0	0	0	0	0	0	0
1110	18.5	0	0	0	0	0	0	0
1111	18.5167	0	0	0	0	0	0	0
1112	18.5333	0	0	0	0	0	0	0
1113	18.55	0	0	0	0	0	0	0
1114	18.5667	0	0	0	0	0	0	0
1115	18.5833	1	0	0	0	0	0	0
1116	18.6	1	0	0	0	0	0	0
1117	18.6167	1	0	0	0	0	0	0
1118	18.6333	1	0	0	0	0	0	0
1119	18.65	1	0	0	0	0	0	0
1120	18.6667	1	0	0	0	0	0	0
1121	18.6833	1	0	0	0	0	0	0
1122	18.7	1	0	0	0	0	0	0
1123	18.7167	1	0	0	0	0	0	0
1124	18.7333	1	0	0	0	0	0	0
1125	18.75	1	0	0	0	0	0	0
1126	18.7667	1	0	0	0	0	0	0
1127	18.7833	1	0	0	0	0	0	0
1128	18.8	1	0	0	0	0	0	0
1129	18.8167	1	0	0	0	0	0	0
1130	18.8333	1	0	0	0	0	0	0
1131	18.85	1	0	0	0	0	0	0
1132	18.8667	1	0	0	0	0	0	0
1133	18.8833	1	0	0	0	0	0	0
1134	18.9	1	0	0	0	0	0	0
1135	18.9167	1	0	0	0	0	0	0
1136	18.9333	1	0	0	0	0	0	0
1137	18.95	1	0	0	0	0	0	0
1138	18.9667	1	0	0	0	0	0	0
1139	18.9833	1	2	0	0	0	0	0
1140	19	1	2	0	0	0	0	0
1141	19.0167	1	2	0	0	0	0	0
1142	19.0333	1	2	0	0	0	0	0
1143	19.05	1	2	0	0	0	0	0
1144	19.0667	1	0	0	0	0	0	0
1145	19.0833	1	0	0	0	0	0	0
1146	19.1	1	0	0	0	0	0	0
1147	19.1167	1	0	0	0	0	0	0
1148	19.1333	1	0	0	0	0	0	0
1149	19.15	1	0	0	0	0	0	0
1150	19.1667	1	0	0	0	0	0	0
1151	19.1833	1	0	0	0	0	0	0
1152	19.2	1	0	0	0	0	0	0
1153	19.2167	1	0	0	0	0	0	0
1154	19.2333	1	0	0	0	0	0	0
1155	19.25	1	0	0	0	0	0	0
1156	19.2667	1	0	0	0	0	0	0
1157	19.2833	1	3	0	0	0	0	0
1158	19.3	1	3	0	0	0	0	0
1159	19.3167	1	3	0	0	0	0	0
1160	19.3333	1	3	0	0	0	0	0
1161	19.35	1	3	0	0	0	0	0
1162	19.3667	1	3	0	0	0	0	0
1163	19.3833	1	3	0	0	0	0	0
1164	19.4	1	3	0	0	0	0	0
1165	19.4167	1	3	0	0	0	0	0
1166	19.4333	1	3	0	0	0	0	0
1167	19.45	1	3	0	0	0	0	0
1168	19.4667	1	3	0	0	0	0	0
1169	19.4833	1	3	0	0	0	0	0
1170	19.5	1	3	0	0	0	0	0
1171	19.5167	1	3	0	0	0	0	0
1172	19.5333	1	3	0	0	0	0	0
1173	19.55	1	3	0	0	0	0	0
1174	19.5667	1	3	0	0	0	0	0
1175	19.5833	1	3	0	0	0	0	0
1176	19.6	1	3	0	0	0	0	0
1177	19.6167	1	3	0	0	0	0	0
1178	19.6333	1	3	0	0	0	0	0
1179	19.65	1	3	0	0	0	0	0
1180	19.6667	1	3	0	0	0	0	0
1181	19.6833	1	3	0	0	0	0	0
1182	19.7	1	3	0	0	0	0	0
1183	19.7167	1	3	0	0	0	0	0
1184	19.7333	1	3	0	0	0	0	0
1185	19.75	1	3	0	0	0	0	0
1186	19.7667	1	3	0	0	0	0	0
1187	19.7833	1	3	0	0	0	0	0
1188	19.8	1	3	0	0	0	0	0
1189	19.8167	1	3	0	0	0	0	0
1190	19.8333	1	0	0	0	0	0	0
1191	19.85	1	0	0	0	0	0	0
1192	19.8667	1	0	0	0	0	0	0
1193	19.8833	1	0	0	0	0	0	0
1194	19.9	1	0	0	0	0	0	0
1195	19.9167	0	0	0	0	0	0	0
1196	19.9333	0	0	0	0	0	0	0
1197	19.95	0	0	0	0	0	0	0
1198	19.9667	0	0	0	0	0	0	0
1199	19.9833	0	0	0	0	0	0	0
1200	20	0	0	0	0	0	0	0
1201	20.0167	0	0	0	0	0	0	0
1202	20.0333	0	0	0	0	0	0	0
1203	20.05	0	0	0	0	0	0	0
1204	20.0667	0	0	0	0	0	0	0
1205	20.0833	0	0	0	0	0	0	0
1206	20.1	0	0	0	0	0	0	0
1207	20.1167	0	0	0	0	0	0	0
1208	20.1333	0	0	0	0	0	0	0
1209	20.15	0	0	0	0	0	0	0
1210	20.1667	0	0	0	0	0	0	0
1211	20.1833	0	0	0	0	0	0	0
1212	20.2	0	0	0	0	0	0	0
1213	20.2167	0	0	0	0	0	0	0
1214	20.2333	0	0	0	0	0	0	0
1215	20.25	0	0	0	0	0	0	0
1216	20.2667	0	0	0	0	0	0	0
1217	20.2833	0	0	0	0	0	0	0
1218	20.3	0	0	0	0	0	0	0
1219	20.3167	0	0	0	0	0	0	0
1220	20.3333	0	0	0	0	0	0	0
1221	20.35	0	0	0	0	0	0	0
1222	20.3667	0	0	0	0	0	0	0
1223	20.3833	0	0	0	0	0	0	0
1224	20.4	0	0	0	0	0	0	0
1225	20.4167	0	0	0	0	0	0	0
1226	20.4333	0	0	0	0	0	0	0
1227	20.45	0	0	0	0	0	0	0
1228	20.4667	0	0	0	0	0	0	0
1229	20.4833	0	0	0	0	0	0	0
1230	20.5	0	0	0	0	0	0	0
1231	20.5167	0	0	0	0	0	0	0
1232	20.5333	0	0	0	0	0	0	0
1233	20.55	0	0	0	0	0	0	0
1234	20.5667	0	0	0	0	0	0	0
1235	20.5833	0	0	0	0	0	0	0
1236	20.6	0	0	0	0	0	0	0
1237	20.6167	0	0	0	0	0	0	0
1238	20.6333	0	0	0	0	0	0	0
1239	20.65	0	0	0	0	0	0	0
1240	20.6667	0	0	0	0	0	0	0
1241	20.6833	0	0	0	0	0	0	0
1242	20.7	0	0	0	0	0	0	0
1243	20.7167	0	0	0	0	0	0	0
1244	20.7333	0	0	0	0	0	0	0
1245	20.75	0	0	0	0	0	0	0
1246	20.7667	0	0	0	0	0	0	0
1247	20.7833	0	0	0	0	0	0	0
1248	20.8	0	0	0	0	0	0	0
1249	20.8167	0	0	0	0	0	0	0
1250	20.8333	0	0	0	0	0	0	0
1251	20.85	0	0	0	0	0	0	0
1252	20.8667	0	0	0	0	0	0	0
1253	20.8833	0	0	0	0	0	0	0
1254	20.9	0	0	0	0	0	0	0
1255	20.9167	0	0	0	0	0	0	0
1256	20.9333	0	0	0	0	0	0	0
1257	20.95	0	0	0	0	0	0	0
1258	20.9667	0	0	0	0	0	0	0
1259	20.9833	0	0	0	0	0	0	0
1260	21	0	0	0	0	0	0	0
1261	21.0167	0	0	0	0	0	0	0
1262	21.0333	0	0	0	0	0	0	0
1263	21.05	0	0	0	0	0	0	0
1264	21.0667	0	0	0	0	0	0	0
1265	21.0833	0	0	0	0	0	0	0
1266	21.1	0	0	0	0	0	0	0
1267	21.1167	0	0	0	0	0	0	0
1268	21.1333	0	0	0	0	0	0	0
1269	21.15	0	0	0	0	0	0	0
1270	21.1667	0	0	0	0	0	0	0
1271	21.1833	0	0	0	0	0	0	0
1272	21.2	0	0	0	0	0	0	0
1273	21.2167	0	0	0	0	0	0	0
1274	21.2333	0	0	0	0	0	0	0
1275	21.25	0	0	0	0	0	0	0
1276	21.2667	0	0	0	0	0	0	0
1277	21.2833	0	0	0	0	0	0	0
1278	21.3	0	0	0	0	0	0	0
1279	21.3167	0	0	0	0	0	0	0
1280	21.3333	0	0	0	0	0	0	0
1281	21.35	0	0	0	0	0	0	0
1282	21.3667	0	0	0	0	0	0	0
1283	21.3833	0	0	0	0	0	0	0
1284	21.4	0	0	0	0	0	0	0
1285	21.4167	0	0	0	0	0	0	0
1286	21.4333	0	0	0	0	0	0	0
1287	21.45	0	0	0	0	0	0	0
1288	21.4667	0	0	0	0	0	0	0
1289	21.4833	0	0	0	0	0	0	0
1290	21.5	0	0	0	0	0	0	0
1291	21.5167	0	0	0	0	0	0	0
1292	21.5333	0	0	0	0	0	0	0
1293	21.55	0	0	0	0	0	0	0
1294	21.5667	0	0	0	0	0	0	0
1295	21.5833	0	0	0	0	0	0	0
1296	21.6	0	0	0	0	0	0	0
1297	21.6167	0	0	0	0	0	0	0
1298	21.6333	0	0	0	0	0	0	0
1299	21.65	0	0	0	0	0	0	0
1300	21.6667	0	0	0	0	0	0	0
1301	21.6833	0	0	0	0	0	0	0
1302	21.7	0	0	0	0	0	0	0
1303	21.7167	0	0	0	0	0	0	0
1304	21.7333	0	0	0	0	0	0	0
1305	21.75	0	0	0	0	0	0	0
1306	21.7667	0	0	0	0	0	0	0
1307	21.7833	0	0	0	0	0	0	0
1308	21.8	0	0	0	0	0	0	0
1309	21.8167	0	0	0	0	0	0	0
1310	21.8333	0	0	0	0	0	0	0
1311	21.85	0	0	0	0	0	0	0
1312	21.8667	0	0	0	0	0	0	0
1313	21.8833	0	0	0	0	0	0	0
1314	21.9	0	0	0	0	0	0	0
1315	21.9167	0	0	0	0	0	0	0
1316	21.9333	0	0	0	0	0	0	0
1317	21.95	0	0	0	0	0	0	0
1318	21.9667	0	0	0	0	0	0	0
1319	21.9833	0	0	0	0	0	0	0
1320	22	0	0	0	0	0	0	0
1321	22.0167	0	0	0	0	0	0	0
1322	22.0333	0	0	0	0	0	0	0
1323	22.05	0	0	0	0	0	0	0
1324	22.0667	0	0	0	0	0	0	0
1325	22.0833	0	0	0	0	0	0	0
1326	22.1	0	0	0	0	0	0	0
1327	22.1167	0	0	0	0	0	0	0
1328	22.1333	0	0	0	0	0	0	0
1329	22.15	0	0	0	0	0	0	0
1330	22.1667	0	0	0	0	0	0	0
1331	22.1833	0	0	0	0	0	0	0
1332	22.2	0	0	0	0	0	0	0
1333	22.2167	0	0	0	0	0	0	0
1334	22.2333	0	0	0	0	0	0	0
1335	22.25	0	0	0	0	0	0	0
1336	22.2667	0	0	0	0	0	0	0
1337	22.2833	0	0	0	0	0	0	0
1338	22.3	0	0	0	0	0	0	0
1339	22.3167	0	0	0	0	0	0	0
1340	22.3333	0	0	0	0	0	0	0
1341	22.35	0	0	0	0	0	0	0
1342	22.3667	0	0	0	0	0	0	0
1343	22.3833	0	0	0	0	0	0	0
1344	22.4	0	0	0	0	0	0	0
1345	22.4167	0	0	0	0	0	0	0
1346	22.4333	0	0	0	0	0	0	0
1347	22.45	0	0	0	0	0	0	0
1348	22.4667	0	0	0	0	0	0	0
1349	22.4833	0	0	0	0	0	0	0
1350	22.5	0	0	0	0	0	0	0
1351	22.5167	0	1	0	0	0	0	0
1352	22.5333	0	1	0	0	0	0	0
1353	22.55	0	1	0	0	0	0	0
1354	22.5667	0	1	0	0	0	0	0
1355	22.5833	0	1	0	0	0	0	0
1356	22.6	0	0	0	0	0	0	0
1357	22.6167	0	0	0	0	0	0	0
1358	22.6333	0	0	0	0	0	0	0
1359	22.65	0	0	0	0	0	0	0
1360	22.6667	0	0	0	0	0	0	0
1361	22.6833	0	0	0	0	0	0	0
1362	22.7	0	0	0	0	0	0	0
1363	22.7167	0	0	0	0	0	0	0
1364	22.7333	0	0	0	0	0	0	0
1365	22.75	0	0	0	0	0	0	0
1366	22.7667	0	0	0	0	0	0	0
1367	22.7833	0	0	0	0	0	0	0
1368	22.8	0	0	0	0	0	0	0
1369	22.8167	0	0	0	0	0	0	0
1370	22.8333	0	0	0	0	0	0	0
1371	22.85	0	0	0	0	0	0	0
1372	22.8667	0	0	0	0	0	0	0
1373	22.8833	0	0	0	0	0	0	0
1374	22.9	0	0	0	0	0	0	0
1375	22.9167	0	0	0	0	0	0	0
1376	22.9333	0	0	0	0	0	0	0
1377	22.95	0	0	0	0	0	0	0
1378	22.9667	0	0	0	0	0	0	0
1379	22.9833	0	0	0	0	0	0	0
1380	23	0	0	0	0	0	0	0
1381	23.0167	0	0	0	0	0	0	0
1382	23.0333	0	0	0	0	0	0	0
1383	23.05	0	0	0	0	0	0	0
1384	23.0667	0	0	0	0	0	0	0
1385	23.0833	0	0	0	0	0	0	0
1386	23.1	0	0	0	0	0	0	0
1387	23.1167	0	0	0	0	0	0	0
1388	23.1333	0	0	0	0	0	0	0
1389	23.15	0	0	0	0	0	0	0
1390	23.1667	0	0	0	0	0	0	0
1391	23.1833	0	0	0	0	0	0	0
1392	23.2	0	0	0	0	0	0	0
1393	23.2167	0	0	0	0	0	0	0
1394	23.2333	0	0	0	0	0	0	0
1395	23.25	0	0	0	0	0	0	0
1396	23.2667	0	0	0	0	0	0	0
1397	23.2833	0	0	0	0	0	0	0
1398	23.3	0	0	0	0	0	0	0
1399	23.3167	0	0	0	0	0	0	0
1400	23.3333	0	0	0	0	0	0	0
1401	23.35	0	0	0	0	0	0	0
1402	23.3667	0	0	0	0	0	0	0
1403	23.3833	0	0	0	0	0	0	0
1404	23.4	0	0	0	0	0	0	0
1405	23.4167	0	0	0	0	0	0	0
1406	23.4333	0	0	0	0	0	0	0
1407	23.45	0	0	0	0	0	0	0
1408	23.4667	0	0	0	0	0	0	0
1409	23.4833	0	0	0	0	0	0	0
1410	23.5	0	0	0	0	0	0	0
1411	23.5167	0	0	0	0	0	0	0
1412	23.5333	0	0	0	0	0	0	0
1413	23.55	0	0	0	0	0	0	0
1414	23.5667	0	0	0	0	0	0	0
1415	23.5833	0	0	0	0	0	0	0
1416	23.6	0	0	0	0	0	0	0
1417	23.6167	0	0	0	0	0	0	0
1418	23.6333	0	0	0	0	0	0	0
1419	23.65	0	0	0	0	0	0	0
1420	23.6667	0	0	0	0	0	0	0
1421	23.6833	0	0	0	0	0	0	0
1422	23.7	0	0	0	0	0	0	0
1423	23.7167	0	0	0	0	0	0	0
1424	23.7333	0	0	0	0	0	0	0
1425	23.75	0	0	0	0	0	0	0
1426	23.7667	0	0	0	0	0	0	0
1427	23.7833	0	0	0	0	0	0	0
1428	23.8	0	0	0	0	0	0	0
1429	23.8167	0	0	0	0	0	0	0
1430	23.8333	0	0	0	0	0	0	0
1431	23.85	0	0	0	0	0	0	0
1432	23.8667	0	0	0	0	0	0	0
1433	23.8833	0	0	0	0	0	0	0
1434	23.9	0	0	0	0	0	0	0
1435	23.9167	0	0	0	0	0	0	0
1436	23.9333	0	0	0	0	0	0	0
1437	23.95	0	0	0	0	0	0	0
1438	23.9667	0	0	0	0	0	0	0
1439	23.9833	0	0	0	0	0	0	0
1440	24	0	0	0	0	0	0	0
1441	24.0167	0	0	0	0	0	0	0
1442	24.0333	0	0	0	0	0	0	0
1443	24.05	0	0	0	0	0	0	0
1444	24.0667	0	0	0	0	0	0	0
1445	24.0833	0	0	0	0	0	0	0
1446	24.1	0	0	0	0	0	0	0
1447	24.1167	0	0	0	0	0	0	0
1448	24.1333	0	0	0	0	0	0	0
1449	24.15	0	0	0	0	0	0	0
1450	24.1667	0	0	0	0	0	0	0
1451	24.1833	0	0	0	0	0	0	0
1452	24.2	0	0	0	0	0	0	0
1453	24.2167	0	0	0	0	0	0	0
1454	24.2333	0	0	0	0	0	0	0
1455	24.25	0	0	0	0	0	0	0
1456	24.2667	0	0	0	0	0	0	0
1457	24.2833	0	1	0	0	0	0	0
1458	24.3	0	1	0	0	0	0	0
1459	24.3167	0	1	0	0	0	0	0
1460	24.3333	0	1	0	0	0	0	0
1461	24.35	0	1	0	0	0	0	0
1462	24.3667	0	1	0	0	0	0	0
1463	24.3833	0	1	0	0	0	0	0
1464	24.4	0	0	0	0	0	0	0
1465	24.4167	0	0	0	0	0	0	0
1466	24.4333	0	0	0	0	0	0	0
1467	24.45	0	0	0	0	0	0	0
1468	24.4667	0	0	0	0	0	0	0
1469	24.4833	0	0	0	0	0	0	0
1470	24.5	0	0	0	0	0	0	0
1471	24.5167	0	0	0	0	0	0	0
1472	24.5333	0	0	0	0	0	0	0
1473	24.55	0	0	0	0	0	0	0
1474	24.5667	0	0	0	0	0	0	0
1475	24.5833	0	0	0	0	0	0	0
1476	24.6	0	0	0	0	0	0	0
1477	24.6167	0	0	0	0	0	0	0
1478	24.6333	0	0	0	0	0	0	0
1479	24.65	0	0	0	0	0	0	0
1480	24.6667	0	0	0	0	0	0	0
1481	24.6833	0	0	0	0	0	0	0
1482	24.7	0	0	0	0	0	0	0
1483	24.7167	0	0	0	0	0	0	0
1484	24.7333	0	0	0	0	0	0	0
1485	24.75	0	0	0	0	0	0	0
1486	24.7667	0	0	0	0	0	0	0
1487	24.7833	0	0	0	0	0	0	0
1488	24.8	0	0	0	0	0	0	0
1489	24.8167	0	0	0	0	0	0	0
1490	24.8333	0	0	0	0	0	0	0
1491	24.85	0	0	0	0	0	0	0
1492	24.8667	0	0	0	0	0	0	0
1493	24.8833	0	0	0	0	0	0	0
1494	24.9	0	0	0	0	0	0	0
1495	24.9167	0	0	0	0	0	0	0
1496	24.9333	0	0	0	0	0	0	0
1497	24.95	0	0	0	0	0	0	0
1498	24.9667	0	0	0	0	0	0	0
1499	24.9833	0	0	0	0	0	0	0
1500	25	0	0	0	0	0	0	0
1501	25.0167	0	0	0	0	0	0	0
1502	25.0333	0	0	0	0	0	0	0
1503	25.05	0	0	0	0	0	0	0
1504	25.0667	0	0	0	0	0	0	0
1505	25.0833	0	0	0	0	0	0	0
1506	25.1	0	0	0	0	0	0	0
1507	25.1167	0	0	0	0	0	0	0
1508	25.1333	0	0	0	0	0	0	0
1509	25.15	0	0	0	0	0	0	0
1510	25.1667	0	0	0	0	0	0	0
1511	25.1833	0	0	0	0	0	0	0
1512	25.2	0	0	0	0	0	0	0
1513	25.2167	0	0	0	0	0	0	0
1514	25.2333	0	0	0	0	0	0	0
1515	25.25	0	0	0	0	0	0	0
1516	25.2667	0	0	0	0	0	0	0
1517	25.2833	0	0	0	0	0	0	0
1518	25.3	0	0	0	0	0	0	0
1519	25.3167	0	0	0	0	0	0	0
1520	25.3333	0	0	0	0	0	0	0
1521	25.35	0	0	0	0	0	0	0
1522	25.3667	0	0	0	0	0	0	0
1523	25.3833	0	0	0	0	0	0	0
1524	25.4	0	0	0	0	0	0	0
1525	25.4167	0	0	0	0	0	0	0
1526	25.4333	0	0	0	0	0	0	0
1527	25.45	0	0	0	0	0	0	0
1528	25.4667	0	0	0	0	0	0	0
1529	25.4833	0	0	0	0	0	0	0
1530	25.5	0	0	0	0	0	0	0
1531	25.5167	0	0	0	0	0	0	0
1532	25.5333	0	0	0	0	0	0	0
1533	25.55	0	0	0	0	0	0	0
1534	25.5667	0	0	0	0	0	0	0
1535	25.5833	0	0	0	0	0	0	0
1536	25.6	0	0	0	0	0	0	0
1537	25.6167	0	0	0	0	0	0	0
1538	25.6333	0	0	0	0	0	0	0
1539	25.65	0	0	0	0	0	0	0
1540	25.6667	0	0	0	0	0	0	0
1541	25.6833	0	0	0	0	0	0	0
1542	25.7	0	0	0	0	0	0	0
1543	25.7167	0	0	0	0	0	0	0
1544	25.7333	0	0	0	0	0	0	0
1545	25.75	0	0	0	0	0	0	0
1546	25.7667	0	0	0	0	0	0	0
1547	25.7833	0	0	0	0	0	0	0
1548	25.8	0	0	0	0	0	0	0
1549	25.8167	0	0	0	0	0	0	0
1550	25.8333	0	0	0	0	0	0	0
1551	25.85	0	0	0	0	0	0	0
1552	25.8667	0	0	0	0	0	0	0
1553	25.8833	0	0	0	0	0	0	0
1554	25.9	0	0	0	0	0	0	0
1555	25.9167	0	0	0	0	0	0	0
1556	25.9333	0	0	0	0	0	0	0
1557	25.95	0	0	0	0	0	0	0
1558	25.9667	0	0	0	0	0	0	0
1559	25.9833	0	1	0	0	0	0	0
1560	26	0	1	0	0	0	0	0
1561	26.0167	0	0	0	0	0	0	0
1562	26.0333	0	0	0	0	0	0	0
1563	26.05	0	0	0	0	0	0	0
1564	26.0667	0	0	0	0	0	0	0
1565	26.0833	0	0	0	0	0	0	0
1566	26.1	0	0	0	0	0	0	0
1567	26.1167	0	0	0	0	0	0	0
1568	26.1333	0	0	0	0	0	0	0
1569	26.15	0	0	0	0	0	0	0
1570	26.1667	0	0	0	0	0	0	0
1571	26.1833	0	0	0	0	0	0	0
1572	26.2	0	0	0	0	0	0	0
1573	26.2167	0	0	0	0	0	0	0
1574	26.2333	0	0	0	0	0	0	0
1575	26.25	0	0	0	0	0	0	0
1576	26.2667	0	0	0	0	0	0	0
1577	26.2833	0	0	0	0	0	0	0
1578	26.3	0	0	0	0	0	0	0
1579	26.3167	0	0	0	0	0	0	0
1580	26.3333	0	1	0	0	0	0	0
1581	26.35	0	1	0	0	0	0	0
1582	26.3667	0	0	0	0	0	0	0
1583	26.3833	0	0	0	0	0	0	0
1584	26.4	0	0	0	0	0	0	0
1585	26.4167	0	0	0	0	0	0	0
1586	26.4333	0	0	0	0	0	0	0
1587	26.45	0	0	0	0	0	0	0
1588	26.4667	0	0	0	0	0	0	0
1589	26.4833	0	0	0	0	0	0	0
1590	26.5	0	0	0	0	0	0	0
1591	26.5167	0	0	0	0	0	0	0
1592	26.5333	0	0	0	0	0	0	0
1593	26.55	0	0	0	0	0	0	0
1594	26.5667	0	0	0	0	0	0	0
1595	26.5833	0	0	0	0	0	0	0
1596	26.6	0	0	0	0	0	0	0
1597	26.6167	0	0	0	0	0	0	0
1598	26.6333	0	0	0	0	0	0	0
1599	26.65	0	0	0	0	0	0	0
1600	26.6667	0	0	0	0	0	0	0
1601	26.6833	0	0	0	0	0	0	0
1602	26.7	0	0	0	0	0	0	0
1603	26.7167	0	0	0	0	0	0	0
1604	26.7333	0	0	0	0	0	0	0
1605	26.75	0	0	0	0	0	0	0
1606	26.7667	0	0	0	0	0	0	0
1607	26.7833	0	0	0	0	0	0	0
1608	26.8	0	0	0	0	0	0	0
1609	26.8167	0	0	0	0	0	0	0
1610	26.8333	0	0	0	0	0	0	0
1611	26.85	0	0	0	0	0	0	0
1612	26.8667	0	0	0	0	0	0	0
1613	26.8833	0	0	0	0	0	0	0
1614	26.9	0	0	0	0	0	0	0
1615	26.9167	0	0	0	0	0	0	0
1616	26.9333	0	0	0	0	0	0	0
1617	26.95	0	0	0	0	0	0	0
1618	26.9667	0	0	0	0	0	0	0
1619	26.9833	0	0	0	0	0	0	0
1620	27	0	0	0	0	0	0	0
1621	27.0167	0	0	0	0	0	0	0
1622	27.0333	0	0	0	0	0	0	0
1623	27.05	0	0	0	0	0	0	0
1624	27.0667	0	0	0	0	0	0	0
1625	27.0833	0	0	0	0	0	0	0
1626	27.1	0	0	0	0	0	0	0
1627	27.1167	0	0	0	0	0	0	0
1628	27.1333	0	0	0	0	0	0	0
1629	27.15	0	0	0	0	0	0	0
1630	27.1667	0	0	0	0	0	0	0
1631	27.1833	0	0	0	0	0	0	0
1632	27.2	0	0	0	0	0	0	0
1633	27.2167	0	0	0	0	0	0	0
1634	27.2333	0	0	0	0	0	0	0
1635	27.25	0	0	0	0	0	0	0
1636	27.2667	0	0	0	0	0	0	0
1637	27.2833	0	0	0	0	0	0	0
1638	27.3	0	0	0	0	0	0	0
1639	27.3167	0	0	0	0	0	0	0
1640	27.3333	0	0	0	0	1	0	0
1641	27.35	0	0	0	0	1	0	0
1642	27.3667	0	0	0	0	1	0	0
1643	27.3833	0	0	0	0	0	0	0
1644	27.4	0	0	0	0	0	0	0
1645	27.4167	0	0	0	0	0	0	0
1646	27.4333	0	0	0	0	0	0	0
1647	27.45	0	0	0	0	0	0	0
1648	27.4667	0	0	0	0	0	0	0
1649	27.4833	0	0	0	0	0	0	0
1650	27.5	0	0	0	0	0	0	0
1651	27.5167	0	0	0	0	0	0	0
1652	27.5333	0	0	0	0	0	0	0
1653	27.55	0	0	0	0	0	0	0
1654	27.5667	0	0	0	0	0	0	0
1655	27.5833	0	0	0	0	0	0	0
1656	27.6	0	0	0	0	0	0	0
1657	27.6167	0	0	0	0	0	0	0
1658	27.6333	0	0	0	0	0	0	0
1659	27.65	0	0	0	0	0	0	0
1660	27.6667	0	0	0	0	0	0	0
1661	27.6833	0	0	0	0	0	0	0
1662	27.7	0	0	0	0	0	0	0
1663	27.7167	0	0	0	0	0	0	0
1664	27.7333	0	0	0	0	0	0	0
1665	27.75	0	0	0	0	0	0	0
1666	27.7667	0	0	0	0	0	0	0
1667	27.7833	0	0	0	0	0	0	0
1668	27.8	0	0	0	0	0	0	0
1669	27.8167	0	0	0	0	0	0	0
1670	27.8333	0	0	0	0	0	0	0
1671	27.85	0	0	0	0	0	0	0
1672	27.8667	0	0	0	0	0	0	0
1673	27.8833	0	0	0	0	0	0	0
1674	27.9	0	0	0	0	0	0	0
1675	27.9167	0	0	0	0	0	0	0
1676	27.9333	0	0	0	0	0	0	0
1677	27.95	0	0	0	0	0	0	0
1678	27.9667	0	0	0	0	0	0	0
1679	27.9833	0	0	0	0	0	0	0
1680	28	0	0	0	0	0	0	0
1681	28.0167	0	0	0	0	1	0	0
1682	28.0333	0	0	0	0	1	0	0
1683	28.05	0	0	0	0	1	0	0
1684	28.0667	0	0	0	0	0	0	0
1685	28.0833	0	0	0	0	0	0	0
1686	28.1	0	0	0	0	0	0	0
1687	28.1167	0	0	0	0	0	0	0
1688	28.1333	0	1	0	0	0	0	0
1689	28.15	0	1	0	0	0	0	0
1690	28.1667	0	1	0	0	0	0	0
1691	28.1833	0	1	0	0	0	0	0
1692	28.2	0	1	0	0	0	0	0
1693	28.2167	0	1	0	0	0	0	0
1694	28.2333	0	1	0	0	0	0	0
1695	28.25	0	1	0	0	0	0	0
1696	28.2667	0	0	0	0	0	0	0
1697	28.2833	0	0	0	0	0	0	0
1698	28.3	0	0	0	0	0	0	0
1699	28.3167	0	0	0	0	0	0	0
1700	28.3333	0	0	0	0	0	0	0
1701	28.35	0	0	0	0	0	0	0
1702	28.3667	0	0	0	0	0	0	0
1703	28.3833	0	0	0	0	0	0	0
1704	28.4	0	0	0	0	0	0	0
1705	28.4167	0	0	0	0	0	0	0
1706	28.4333	0	0	0	0	0	0	0
1707	28.45	0	0	0	0	0	0	0
1708	28.4667	0	0	0	0	0	0	0
1709	28.4833	0	0	0	0	0	0	0
1710	28.5	0	0	0	0	0	0	0
1711	28.5167	0	0	0	0	0	0	0
1712	28.5333	0	0	0	0	0	0	0
1713	28.55	0	0	0	0	0	0	0
1714	28.5667	0	0	0	0	0	0	0
1715	28.5833	0	0	0	0	0	0	0
1716	28.6	0	0	0	0	0	0	0
1717	28.6167	0	0	0	0	0	0	0
1718	28.6333	0	0	0	0	0	0	0
1719	28.65	0	0	0	0	0	0	0
1720	28.6667	0	0	0	0	0	0	0
1721	28.6833	0	0	0	0	0	0	0
1722	28.7	0	0	0	0	0	0	0
1723	28.7167	0	0	0	0	0	0	0
1724	28.7333	0	0	0	0	0	0	0
1725	28.75	0	0	0	0	0	0	0
1726	28.7667	0	0	0	0	0	0	0
1727	28.7833	0	0	0	0	0	0	0
1728	28.8	0	0	0	0	0	0	0
1729	28.8167	0	0	0	0	0	0	0
1730	28.8333	0	1	0	0	0	0	0
1731	28.85	0	1	0	0	0	0	0
1732	28.8667	0	1	0	0	0	0	0
1733	28.8833	0	1	0	0	0	0	0
1734	28.9	0	1	0	0	0	0	0
1735	28.9167	0	1	0	0	0	0	0
1736	28.9333	0	1	0	0	0	0	0
1737	28.95	0	1	0	0	0	0	0
1738	28.9667	0	1	0	0	0	0	0
1739	28.9833	0	0	0	0	0	0	0
1740	29	0	0	0	0	0	0	0
1741	29.0167	0	0	0	0	0	0	0
1742	29.0333	0	0	0	0	0	0	0
1743	29.05	0	0	0	0	0	0	0
1744	29.0667	0	0	0	0	0	0	0
1745	29.0833	0	0	0	0	0	0	0
1746	29.1	0	0	0	0	0	0	0
1747	29.1167	0	0	0	0	0	0	0
1748	29.1333	0	0	0	0	0	0	0
1749	29.15	0	0	0	0	0	0	0
1750	29.1667	0	0	0	0	0	0	0
1751	29.1833	0	0	0	0	0	0	0
1752	29.2	0	0	0	0	0	0	0
1753	29.2167	0	0	0	0	0	0	0
1754	29.2333	0	0	0	0	0	0	0
1755	29.25	0	0	0	0	0	0	0
1756	29.2667	0	0	0	0	0	0	0
1757	29.2833	0	0	0	0	0	0	0
1758	29.3	0	0	0	0	0	0	0
1759	29.3167	0	0	0	0	0	0	0
1760	29.3333	0	0	0	0	0	0	0
1761	29.35	0	0	0	0	0	0	0
1762	29.3667	0	0	0	0	0	0	0
1763	29.3833	0	0	0	0	0	0	0
1764	29.4	0	0	0	0	0	0	0
1765	29.4167	0	0	0	0	0	0	0
1766	29.4333	0	0	0	0	0	0	0
1767	29.45	0	0	0	0	0	0	0
1768	29.4667	0	0	0	0	0	0	0
1769	29.4833	0	0	0	0	0	0	0
1770	29.5	0	0	0	0	0	0	0
1771	29.5167	0	0	0	0	0	0	0
1772	29.5333	0	0	0	0	0	0	0
1773	29.55	0	0	0	0	0	0	0
1774	29.5667	0	0	0	0	0	0	0
1775	29.5833	0	0	0	0	0	0	0
1776	29.6	0	0	0	0	0	0	0
1777	29.6167	1	0	0	0	0	0	0
1778	29.6333	1	0	0	0	0	0	0
1779	29.65	1	0	0	0	0	0	0
1780	29.6667	1	0	0	0	0	0	0
1781	29.6833	1	0	0	0	0	0	0
1782	29.7	1	0	0	0	0	0	0
1783	29.7167	1	0	0	0	0	0	0
1784	29.7333	1	0	0	0	0	0	0
1785	29.75	1	0	0	0	0	0	0
1786	29.7667	1	0	0	0	0	0	0
1787	29.7833	1	0	0	0	0	0	0
1788	29.8	1	0	0	0	0	0	0
1789	29.8167	1	0	0	0	0	0	0
1790	29.8333	1	0	0	0	0	0	0
1791	29.85	1	0	0	0	0	0	0
1792	29.8667	1	0	0	0	0	0	0
1793	29.8833	1	0	0	0	0	0	0
1794	29.9	1	0	0	0	0	0	0
1795	29.9167	1	0	0	0	0	0	0
1796	29.9333	1	0	0	0	0	0	0
1797	29.95	1	0	0	0	0	0	0
1798	29.9667	1	0	0	0	0	0	0
1799	29.9833	1	0	0	0	0	0	0
1800	30	1	0	0	0	0	0	0
1801	30.0167	1	0	0	0	0	0	0
1802	30.0333	1	0	0	0	0	0	0
1803	30.05	1	0	0	0	0	0	0
1804	30.0667	1	0	0	0	0	0	0
1805	30.0833	1	0	0	0	0	0	0
1806	30.1	1	0	0	0	0	0	0
1807	30.1167	1	0	0	0	0	0	0
1808	30.1333	1	0	0	0	0	0	0
1809	30.15	1	0	0	0	0	0	0
1810	30.1667	1	0	0	0	0	0	0
1811	30.1833	1	0	0	0	0	0	0
1812	30.2	1	0	0	0	0	0	0
1813	30.2167	1	0	0	0	0	0	0
1814	30.2333	1	0	0	0	0	0	0
1815	30.25	1	0	0	0	0	0	0
1816	30.2667	1	0	0	0	0	0	0
1817	30.2833	1	0	0	0	0	0	0
1818	30.3	1	0	0	0	0	0	0
1819	30.3167	1	0	0	0	0	0	0
1820	30.3333	1	0	0	0	0	0	0
1821	30.35	1	0	0	0	0	0	0
1822	30.3667	1	0	0	0	0	0	0
1823	30.3833	1	0	0	0	0	0	0
1824	30.4	1	0	0	0	0	0	0
1825	30.4167	1	0	0	0	0	0	0
1826	30.4333	1	0	0	0	0	0	0
1827	30.45	1	0	0	0	0	0	0
1828	30.4667	1	0	0	0	0	0	0
1829	30.4833	1	0	0	0	0	0	0
1830	30.5	1	0	0	0	0	0	0
1831	30.5167	1	0	0	0	0	0	0
1832	30.5333	1	0	0	0	0	0	0
1833	30.55	1	0	0	0	0	0	0
1834	30.5667	1	0	0	0	0	0	0
1835	30.5833	1	0	0	0	0	0	0
1836	30.6	1	0	0	0	0	0	0
1837	30.6167	0	0	0	0	0	0	0
1838	30.6333	0	0	0	0	0	0	0
1839	30.65	0	0	0	0	0	0	0
1840	30.6667	0	0	0	0	0	0	0
1841	30.6833	0	0	0	0	0	0	0
1842	30.7	0	0	0	0	0	0	0
1843	30.7167	0	0	0	0	0	0	0
1844	30.7333	0	0	0	0	0	0	0
1845	30.75	0	0	0	0	0	0	0
1846	30.7667	0	0	0	0	0	0	0
1847	30.7833	0	0	0	0	0	0	0
1848	30.8	0	0	0	0	0	0	0
1849	30.8167	0	0	0	0	0	0	0
1850	30.8333	0	0	0	0	0	0	0
1851	30.85	0	0	0	0	0	0	0
1852	30.8667	0	0	0	0	0	0	0
1853	30.8833	0	0	0	0	0	0	0
1854	30.9	0	0	0	0	0	0	0
1855	30.9167	0	0	0	0	0	0	0
1856	30.9333	0	0	0	0	0	0	0
1857	30.95	0	0	0	0	0	0	0
1858	30.9667	0	0	0	0	0	0	0
1859	30.9833	0	0	0	0	0	0	0
1860	31	0	0	0	0	0	0	0
1861	31.0167	0	0	0	0	0	0	0
1862	31.0333	0	0	0	0	0	0	0
1863	31.05	0	0	0	0	0	0	0
1864	31.0667	0	0	0	0	0	0	0
1865	31.0833	0	0	0	0	0	0	0
1866	31.1	0	0	0	0	0	0	0
1867	31.1167	0	0	0	0	0	0	0
1868	31.1333	0	0	0	0	0	0	0
1869	31.15	0	0	0	0	0	0	0
1870	31.1667	0	0	0	0	0	0	0
1871	31.1833	0	0	0	0	0	0	0
1872	31.2	0	0	0	0	0	0	0
1873	31.2167	0	0	0	0	0	0	0
1874	31.2333	0	0	0	0	0	0	0
1875	31.25	0	0	0	0	0	0	0
1876	31.2667	0	0	0	0	0	0	0
1877	31.2833	0	0	0	0	0	0	0
1878	31.3	0	0	0	0	0	0	0
1879	31.3167	0	0	0	0	0	0	0
1880	31.3333	1	0	0	0	0	0	0
1881	31.35	1	0	0	0	0	0	0
1882	31.3667	1	0	0	0	0	0	0
1883	31.3833	1	0	0	0	0	0	0
1884	31.4	1	0	0	0	0	0	0
1885	31.4167	1	0	0	0	0	0	0
1886	31.4333	1	0	0	0	0	0	0
1887	31.45	1	0	0	0	0	0	0
1888	31.4667	1	0	0	0	0	0	0
1889	31.4833	1	0	0	0	0	0	0
1890	31.5	1	0	0	0	0	0	0
1891	31.5167	1	0	0	0	0	0	0
1892	31.5333	1	0	0	0	0	0	0
1893	31.55	1	0	0	0	0	0	0
1894	31.5667	1	0	0	0	0	0	0
1895	31.5833	1	0	0	0	0	0	0
1896	31.6	1	0	0	0	0	0	0
1897	31.6167	1	0	0	0	0	0	0
1898	31.6333	1	0	0	0	0	0	0
1899	31.65	1	0	0	0	0	0	0
1900	31.6667	1	0	0	0	0	0	0
1901	31.6833	1	0	0	0	0	0	0
1902	31.7	1	0	0	0	0	0	0
1903	31.7167	1	0	0	0	0	0	0
1904	31.7333	1	0	0	0	0	0	0
1905	31.75	1	0	0	0	0	0	0
1906	31.7667	1	0	0	0	0	0	0
1907	31.7833	1	0	0	0	0	0	0
1908	31.8	1	0	0	0	0	0	0
1909	31.8167	1	0	0	0	0	0	0
1910	31.8333	0	0	0	0	0	0	0
1911	31.85	0	0	0	0	0	0	0
1912	31.8667	0	0	0	0	0	0	0
1913	31.8833	0	0	0	0	0	0	0
1914	31.9	0	0	0	0	0	0	0
1915	31.9167	0	0	0	0	0	0	0
1916	31.9333	0	0	0	0	0	0	0
1917	31.95	0	0	0	0	0	0	0
1918	31.9667	0	0	0	0	0	0	0
1919	31.9833	0	0	0	0	0	0	0
1920	32	0	0	0	0	0	0	0
1921	32.0167	0	0	0	0	0	0	0
1922	32.0333	0	0	0	0	0	0	0
1923	32.05	0	0	0	0	0	0	0
1924	32.0667	0	0	0	0	0	0	0
1925	32.0833	0	0	0	0	0	0	0
1926	32.1	0	0	0	0	0	0	0
1927	32.1167	0	0	0	0	0	0	0
1928	32.1333	0	0	0	0	0	0	0
1929	32.15	0	0	0	0	0	0	0
1930	32.1667	0	0	0	0	0	0	0
1931	32.1833	0	0	0	0	0	0	0
1932	32.2	0	0	0	0	0	0	0
1933	32.2167	0	0	0	0	0	0	0
1934	32.2333	0	0	0	0	0	0	0
1935	32.25	0	0	0	0	0	0	0
1936	32.2667	0	0	0	0	0	0	0
1937	32.2833	0	0	0	0	0	0	0
1938	32.3	0	0	0	0	0	0	0
1939	32.3167	0	0	0	0	0	0	0
1940	32.3333	0	0	0	0	0	0	0
1941	32.35	0	0	0	0	0	0	0
1942	32.3667	0	0	0	0	0	0	0
1943	32.3833	0	0	0	0	0	0	0
1944	32.4	0	0	0	0	0	0	0
1945	32.4167	0	0	0	0	0	0	0
1946	32.4333	0	0	0	0	0	0	0
1947	32.45	0	0	0	0	0	0	0
1948	32.4667	0	0	0	0	0	0	0
1949	32.4833	0	0	0	0	0	0	0
1950	32.5	0	0	0	0	0	0	0
1951	32.5167	0	0	0	0	0	0	0
1952	32.5333	0	0	0	0	0	0	0
1953	32.55	0	0	0	0	0	0	0
1954	32.5667	0	0	0	0	0	0	0
1955	32.5833	0	0	0	0	0	0	0
1956	32.6	0	0	0	0	0	0	0
1957	32.6167	0	1	0	0	0	0	0
1958	32.6333	0	1	0	0	0	0	0
1959	32.65	0	1	0	0	0	0	0
1960	32.6667	0	0	0	0	0	0	0
1961	32.6833	0	0	0	0	0	0	0
1962	32.7	0	0	0	0	0	0	0
1963	32.7167	0	0	0	0	0	0	0
1964	32.7333	0	0	0	0	0	0	0
1965	32.75	0	0	0	0	0	0	0
1966	32.7667	0	0	0	0	0	0	0
1967	32.7833	0	0	0	0	0	0	0
1968	32.8	0	0	0	0	0	0	0
1969	32.8167	0	0	0	0	0	0	0
1970	32.8333	0	0	0	0	0	0	0
1971	32.85	0	0	0	0	0	0	0
1972	32.8667	0	0	0	0	0	0	0
1973	32.8833	0	0	0	0	0	0	0
1974	32.9	0	0	0	0	0	0	0
1975	32.9167	0	0	0	0	0	0	0
1976	32.9333	0	0	0	0	0	0	0
1977	32.95	0	0	0	0	0	0	0
1978	32.9667	0	0	0	0	0	0	0
1979	32.9833	0	0	0	0	0	0	0
1980	33	0	0	0	0	0	0	0
1981	33.0167	0	0	0	0	0	0	0
1982	33.0333	0	0	0	0	0	0	0
1983	33.05	0	0	0	0	0	0	0
1984	33.0667	0	0	0	0	0	0	0
1985	33.0833	0	0	0	0	0	0	0
1986	33.1	0	0	0	0	0	0	0
1987	33.1167	0	0	0	0	0	0	0
1988	33.1333	0	0	0	0	0	0	0
1989	33.15	0	0	0	0	0	0	0
1990	33.1667	0	0	0	0	0	0	0
1991	33.1833	0	0	0	0	0	0	0
1992	33.2	0	0	0	0	0	0	0
1993	33.2167	0	0	0	0	0	0	0
1994	33.2333	0	0	0	0	0	0	0
1995	33.25	0	0	0	0	0	0	0
1996	33.2667	0	0	0	0	0	0	0
1997	33.2833	0	0	0	0	0	0	0
1998	33.3	0	0	0	0	0	0	0
[truncated: 1,603 more rows]

## Sheet: GP29_7
Seconds	Minutes	Sillago sp	Arenigobius bifrenatus	Sillago ciliata	Mugil cephalus	Girella elevata	Acanthopagrus australis	Gerres subfasciatus	Favonigobius exquisitus	Rhabdosargus sarba	Atherinomorus vaigiensis	Ambassis
0	0	0	0	0	0	0	0	0	0	0	0	0
1	0.0166667	31	1	0	0	0	0	0	0	0	0	0
2	0.0333333	31	1	0	0	0	0	0	0	0	0	0
3	0.05	31	1	0	0	0	0	0	0	0	0	0
4	0.0666667	31	1	0	0	0	0	0	0	0	0	0
5	0.0833333	31	1	0	0	0	0	0	0	0	0	0
6	0.1	31	1	0	0	0	0	0	0	0	0	0
7	0.116667	31	1	0	0	0	0	0	0	0	0	0
8	0.133333	31	1	0	0	0	0	0	0	0	0	0
9	0.15	31	1	0	0	0	0	0	0	0	0	0
10	0.166667	31	1	0	0	0	0	0	0	0	0	0
11	0.183333	31	1	0	0	0	0	0	0	0	0	0
12	0.2	31	1	0	0	0	0	0	0	0	0	0
13	0.216667	31	1	0	0	0	0	0	0	0	0	0
14	0.233333	31	1	0	0	0	0	0	0	0	0	0
15	0.25	31	1	0	0	0	0	0	0	0	0	0
16	0.266667	31	1	0	0	0	0	0	0	0	0	0
17	0.283333	31	1	0	0	0	0	0	0	0	0	0
18	0.3	31	1	0	0	0	0	0	0	0	0	0
19	0.316667	31	1	0	0	0	0	0	0	0	0	0
20	0.333333	31	1	0	0	0	0	0	0	0	0	0
21	0.35	31	1	0	0	0	0	0	0	0	0	0
22	0.366667	31	1	0	0	0	0	0	0	0	0	0
23	0.383333	31	1	0	0	0	0	0	0	0	0	0
24	0.4	31	1	0	0	0	0	0	0	0	0	0
25	0.416667	31	1	0	0	0	0	0	0	0	0	0
26	0.433333	31	1	0	0	0	0	0	0	0	0	0
27	0.45	31	1	0	0	0	0	0	0	0	0	0
28	0.466667	31	1	0	0	0	0	0	0	0	0	0
29	0.483333	31	1	0	0	0	0	0	0	0	0	0
30	0.5	31	1	0	0	0	0	0	0	0	0	0
31	0.516667	31	1	1	0	0	0	0	0	0	0	0
32	0.533333	31	1	1	0	0	0	0	0	0	0	0
33	0.55	31	1	1	0	0	0	0	0	0	0	0
34	0.566667	31	1	1	0	0	0	0	0	0	0	0
35	0.583333	31	1	0	0	0	0	0	0	0	0	0
36	0.6	31	1	0	0	0	0	0	0	0	0	0
37	0.616667	31	1	0	0	0	0	0	0	0	0	0
38	0.633333	31	1	0	0	0	0	0	0	0	0	0
39	0.65	31	1	0	0	0	0	0	0	0	0	0
40	0.666667	31	1	0	0	0	0	0	0	0	0	0
41	0.683333	31	1	0	0	0	0	0	0	0	0	0
42	0.7	31	1	0	0	0	0	0	0	0	0	0
43	0.716667	31	1	0	0	0	0	0	0	0	0	0
44	0.733333	31	1	0	0	0	0	0	0	0	0	0
45	0.75	31	1	0	0	0	0	0	0	0	0	0
46	0.766667	31	1	0	0	0	0	0	0	0	0	0
47	0.783333	31	1	0	0	0	0	0	0	0	0	0
48	0.8	31	1	0	0	0	0	0	0	0	0	0
49	0.816667	31	1	0	0	0	0	0	0	0	0	0
50	0.833333	31	1	0	0	0	0	0	0	0	0	0
51	0.85	31	1	0	0	0	0	0	0	0	0	0
52	0.866667	31	2	0	0	0	0	0	0	0	0	0
53	0.883333	31	2	0	0	0	0	0	0	0	0	0
54	0.9	31	2	0	0	0	0	0	0	0	0	0
55	0.916667	31	2	0	0	0	0	0	0	0	0	0
56	0.933333	31	2	0	0	0	0	0	0	0	0	0
57	0.95	31	2	0	0	0	0	0	0	0	0	0
58	0.966667	31	2	0	0	0	0	0	0	0	0	0
59	0.983333	31	2	0	0	0	0	0	0	0	0	0
60	1	31	2	0	0	0	0	0	0	0	0	0
61	1.01667	31	2	0	0	0	0	0	0	0	0	0
62	1.03333	31	2	0	0	0	0	0	0	0	0	0
63	1.05	31	2	0	0	0	0	0	0	0	0	0
64	1.06667	31	2	0	0	0	0	0	0	0	0	0
65	1.08333	31	2	0	0	0	0	0	0	0	0	0
66	1.1	31	2	0	0	0	0	0	0	0	0	0
67	1.11667	31	2	0	0	0	0	0	0	0	0	0
68	1.13333	31	2	0	0	0	0	0	0	0	0	0
69	1.15	31	2	0	0	0	0	0	0	0	0	0
70	1.16667	31	2	0	0	0	0	0	0	0	0	0
71	1.18333	31	1	0	0	0	0	0	0	0	0	0
72	1.2	31	0	0	0	0	0	0	0	0	0	0
73	1.21667	31	0	0	0	0	0	0	0	0	0	0
74	1.23333	31	0	0	0	0	0	0	0	0	0	0
75	1.25	31	0	0	0	0	0	0	0	0	0	0
76	1.26667	31	0	0	0	0	0	0	0	0	0	0
77	1.28333	31	0	0	0	0	0	0	0	0	0	0
78	1.3	31	0	0	0	0	0	0	0	0	0	0
79	1.31667	31	0	0	0	0	0	0	0	0	0	0
80	1.33333	31	0	0	0	0	0	0	0	0	0	0
81	1.35	31	0	0	0	0	0	0	0	0	0	0
82	1.36667	31	0	0	0	0	0	0	0	0	0	0
83	1.38333	31	0	0	0	0	0	0	0	0	0	0
84	1.4	31	0	0	0	0	0	0	0	0	0	0
85	1.41667	31	0	0	0	0	0	0	0	0	0	0
86	1.43333	31	0	0	0	0	0	0	0	0	0	0
87	1.45	31	0	0	0	0	0	0	0	0	0	0
88	1.46667	31	0	0	0	0	0	0	0	0	0	0
89	1.48333	31	0	0	0	0	0	0	0	0	0	0
90	1.5	31	0	0	0	0	0	0	0	0	0	0
91	1.51667	31	0	0	0	0	0	0	0	0	0	0
92	1.53333	31	0	0	0	0	0	0	0	0	0	0
93	1.55	31	0	0	0	0	0	0	0	0	0	0
94	1.56667	31	0	0	0	0	0	0	0	0	0	0
95	1.58333	31	0	0	0	0	0	0	0	0	0	0
96	1.6	31	0	0	0	0	0	0	0	0	0	0
97	1.61667	31	0	0	0	0	0	0	0	0	0	0
98	1.63333	31	0	0	0	0	0	0	0	0	0	0
99	1.65	31	0	0	0	0	0	0	0	0	0	0
100	1.66667	31	0	0	0	0	0	0	0	0	0	0
101	1.68333	31	0	0	0	0	0	0	0	0	0	0
102	1.7	31	0	0	0	0	0	0	0	0	0	0
103	1.71667	31	0	0	0	0	0	0	0	0	0	0
104	1.73333	31	0	0	0	0	0	0	0	0	0	0
105	1.75	31	0	0	0	0	0	0	0	0	0	0
106	1.76667	31	0	0	0	0	0	0	0	0	0	0
107	1.78333	31	0	0	0	0	0	0	0	0	0	0
108	1.8	31	0	0	0	0	0	0	0	0	0	0
109	1.81667	31	0	0	0	0	0	0	0	0	0	0
110	1.83333	31	0	0	0	0	0	0	0	0	0	0
111	1.85	31	0	0	0	0	0	0	0	0	0	0
112	1.86667	31	0	0	0	0	0	0	0	0	0	0
113	1.88333	31	0	0	0	0	0	0	0	0	0	0
114	1.9	31	0	0	0	0	0	0	0	0	0	0
115	1.91667	31	0	0	0	0	0	0	0	0	0	0
116	1.93333	31	0	0	0	0	0	0	0	0	0	0
117	1.95	31	0	0	0	0	0	0	0	0	0	0
118	1.96667	31	0	0	0	0	0	0	0	0	0	0
119	1.98333	31	0	0	0	0	0	0	0	0	0	0
120	2	31	0	0	0	0	0	0	0	0	0	0
121	2.01667	31	1	0	0	0	0	0	0	0	0	0
122	2.03333	31	1	0	0	0	0	0	0	0	0	0
123	2.05	31	1	0	0	0	0	0	0	0	0	0
124	2.06667	31	1	0	0	0	0	0	0	0	0	0
125	2.08333	31	1	0	0	0	0	0	0	0	0	0
126	2.1	31	1	0	0	0	0	0	0	0	0	0
127	2.11667	31	1	0	0	0	0	0	0	0	0	0
128	2.13333	31	1	0	0	0	0	0	0	0	0	0
129	2.15	31	1	0	0	0	0	0	0	0	0	0
130	2.16667	31	1	0	0	0	0	0	0	0	0	0
131	2.18333	31	1	0	0	0	0	0	0	0	0	0
132	2.2	31	1	0	0	0	0	0	0	0	0	0
133	2.21667	31	1	0	0	0	0	0	0	0	0	0
134	2.23333	31	1	0	0	0	0	0	0	0	0	0
135	2.25	31	1	0	0	0	0	0	0	0	0	0
136	2.26667	31	1	0	0	0	0	0	0	0	0	0
137	2.28333	31	1	0	0	0	0	0	0	0	0	0
138	2.3	31	1	0	0	0	0	0	0	0	0	0
139	2.31667	31	1	0	0	0	0	0	0	0	0	0
140	2.33333	31	1	0	0	0	0	0	0	0	0	0
141	2.35	31	1	0	0	0	0	0	0	0	0	0
142	2.36667	31	1	0	0	0	0	0	0	0	0	0
143	2.38333	31	1	0	0	0	0	0	0	0	0	0
144	2.4	31	1	0	0	0	0	0	0	0	0	0
145	2.41667	31	1	0	0	0	0	0	0	0	0	0
146	2.43333	31	1	0	0	0	0	0	0	0	0	0
147	2.45	31	1	0	0	0	0	0	0	0	0	0
148	2.46667	31	1	0	0	0	0	0	0	0	0	0
149	2.48333	31	1	0	0	0	0	0	0	0	0	0
150	2.5	31	1	0	0	0	0	0	0	0	0	0
151	2.51667	31	1	0	0	0	0	0	0	0	0	0
152	2.53333	31	1	0	0	0	0	0	0	0	0	0
153	2.55	31	1	0	0	0	0	0	0	0	0	0
154	2.56667	31	1	0	2	0	0	0	0	0	0	0
155	2.58333	31	1	0	2	0	0	0	0	0	0	0
156	2.6	31	1	0	2	0	0	0	0	0	0	0
157	2.61667	31	1	0	2	0	0	0	0	0	0	0
158	2.63333	31	1	0	0	0	0	0	0	0	0	0
159	2.65	31	1	0	0	0	0	0	0	0	0	0
160	2.66667	31	1	0	0	0	0	0	0	0	0	0
161	2.68333	31	1	0	0	0	0	0	0	0	0	0
162	2.7	31	1	0	0	0	0	0	0	0	0	0
163	2.71667	31	1	0	0	0	0	0	0	0	0	0
164	2.73333	31	1	0	0	0	0	0	0	0	0	0
165	2.75	31	1	0	0	0	0	0	0	0	0	0
166	2.76667	31	1	0	0	0	0	0	0	0	0	0
167	2.78333	31	1	0	0	0	0	0	0	0	0	0
168	2.8	31	1	0	0	0	0	0	0	0	0	0
169	2.81667	31	1	0	0	0	0	0	0	0	0	0
170	2.83333	31	1	0	0	0	0	0	0	0	0	0
171	2.85	31	1	0	0	0	0	0	0	0	0	0
172	2.86667	31	1	0	0	0	0	0	0	0	0	0
173	2.88333	31	1	0	0	0	0	0	0	0	0	0
174	2.9	31	1	0	0	0	0	0	0	0	0	0
175	2.91667	31	1	0	0	0	0	0	0	0	0	0
176	2.93333	31	1	0	0	0	0	0	0	0	0	0
177	2.95	31	1	0	0	0	0	0	0	0	0	0
178	2.96667	31	1	0	0	0	0	0	0	0	0	0
179	2.98333	31	1	0	0	0	0	0	0	0	0	0
180	3	31	1	0	0	0	0	0	0	0	0	0
181	3.01667	31	1	0	0	0	0	0	0	0	0	0
182	3.03333	31	1	0	0	0	0	0	0	0	0	0
183	3.05	31	1	0	0	0	0	0	0	0	0	0
184	3.06667	31	1	0	0	0	0	0	0	0	0	0
185	3.08333	31	1	0	0	0	0	0	0	0	0	0
186	3.1	31	1	0	0	0	0	0	0	0	0	0
187	3.11667	31	1	0	0	0	0	0	0	0	0	0
188	3.13333	31	1	0	0	0	0	0	0	0	0	0
189	3.15	31	1	0	0	0	0	0	0	0	0	0
190	3.16667	31	1	0	0	0	0	0	0	0	0	0
191	3.18333	31	1	0	0	0	0	0	0	0	0	0
192	3.2	31	1	0	0	0	0	0	0	0	0	0
193	3.21667	31	1	0	0	0	0	0	0	0	0	0
194	3.23333	31	1	0	0	0	0	0	0	0	0	0
195	3.25	31	1	0	0	0	0	0	0	0	0	0
196	3.26667	31	1	0	0	0	0	0	0	0	0	0
197	3.28333	31	1	0	0	0	0	0	0	0	0	0
198	3.3	31	1	0	0	0	0	0	0	0	0	0
199	3.31667	31	1	0	0	0	0	0	0	0	0	0
200	3.33333	31	1	0	0	0	0	0	0	0	0	0
201	3.35	31	1	0	0	0	0	0	0	0	0	0
202	3.36667	31	1	0	0	0	0	0	0	0	0	0
203	3.38333	31	1	0	0	0	0	0	0	0	0	0
204	3.4	31	1	0	0	0	0	0	0	0	0	0
205	3.41667	31	1	0	0	0	0	0	0	0	0	0
206	3.43333	31	1	0	0	0	0	0	0	0	0	0
207	3.45	31	1	0	0	0	0	0	0	0	0	0
208	3.46667	31	1	0	0	0	0	0	0	0	0	0
209	3.48333	31	1	0	0	0	0	0	0	0	0	0
210	3.5	31	1	0	0	0	0	0	0	0	0	0
211	3.51667	31	1	0	0	0	0	0	0	0	0	0
212	3.53333	31	1	0	0	0	0	0	0	0	0	0
213	3.55	31	1	0	0	0	0	0	0	0	0	0
214	3.56667	31	1	0	0	0	0	0	0	0	0	0
215	3.58333	31	1	0	0	0	0	0	0	0	0	0
216	3.6	31	1	0	0	0	0	0	0	0	0	0
217	3.61667	31	1	0	0	0	0	0	0	0	0	0
218	3.63333	31	1	0	0	0	0	0	0	0	0	0
219	3.65	31	1	0	0	0	0	0	0	0	0	0
220	3.66667	31	1	0	0	0	0	0	0	0	0	0
221	3.68333	31	1	0	0	0	0	0	0	0	0	0
222	3.7	31	1	0	0	0	0	0	0	0	0	0
223	3.71667	31	1	0	0	0	0	0	0	0	0	0
224	3.73333	31	1	0	0	0	0	0	0	0	0	0
225	3.75	31	1	0	0	0	0	0	0	0	0	0
226	3.76667	31	1	0	0	0	0	0	0	0	0	0
227	3.78333	31	1	0	0	0	0	0	0	0	0	0
228	3.8	31	1	0	0	0	0	0	0	0	0	0
229	3.81667	31	1	0	0	0	0	0	0	0	0	0
230	3.83333	31	1	0	0	0	0	0	0	0	0	0
231	3.85	31	1	0	0	0	0	0	0	0	0	0
232	3.86667	31	1	0	0	0	0	0	0	0	0	0
233	3.88333	31	1	0	0	0	0	0	0	0	0	0
234	3.9	31	1	0	0	0	0	0	0	0	0	0
235	3.91667	31	1	0	0	0	0	0	0	0	0	0
236	3.93333	31	1	0	0	0	0	0	0	0	0	0
237	3.95	31	1	0	0	0	0	0	0	0	0	0
238	3.96667	31	1	0	0	0	0	0	0	0	0	0
239	3.98333	31	1	0	0	0	0	0	0	0	0	0
240	4	31	1	0	0	0	0	0	0	0	0	0
241	4.01667	31	1	0	0	0	0	0	0	0	0	0
242	4.03333	31	1	0	0	0	0	0	0	0	0	0
243	4.05	31	1	0	0	0	0	0	0	0	0	0
244	4.06667	31	1	0	0	0	0	0	0	0	0	0
245	4.08333	31	1	0	0	0	0	0	0	0	0	0
246	4.1	31	1	0	0	0	0	0	0	0	0	0
247	4.11667	31	1	0	0	0	0	0	0	0	0	0
248	4.13333	31	1	0	0	0	0	0	0	0	0	0
249	4.15	31	1	0	0	0	0	0	0	0	0	0
250	4.16667	31	1	0	0	0	0	0	0	0	0	0
251	4.18333	31	1	0	0	0	0	0	0	0	0	0
252	4.2	31	1	0	0	0	0	0	0	0	0	0
253	4.21667	31	1	0	0	0	0	0	0	0	0	0
254	4.23333	31	1	0	0	0	0	0	0	0	0	0
255	4.25	31	1	0	0	0	0	0	0	0	0	0
256	4.26667	31	1	0	0	0	0	0	0	0	0	0
257	4.28333	31	1	0	0	0	0	0	0	0	0	0
258	4.3	31	1	0	0	0	0	0	0	0	0	0
259	4.31667	31	1	0	0	0	0	0	0	0	0	0
260	4.33333	31	1	0	0	0	0	0	0	0	0	0
261	4.35	31	1	0	0	0	0	0	0	0	0	0
262	4.36667	31	1	0	0	0	0	0	0	0	0	0
263	4.38333	31	1	0	0	0	0	0	0	0	0	0
264	4.4	31	1	0	0	0	0	0	0	0	0	0
265	4.41667	31	1	0	0	0	0	0	0	0	0	0
266	4.43333	31	1	0	0	0	0	0	0	0	0	0
267	4.45	31	1	0	0	0	0	0	0	0	0	0
268	4.46667	31	1	0	0	0	0	0	0	0	0	0
269	4.48333	31	0	0	0	0	0	0	0	0	0	0
270	4.5	31	0	0	0	0	0	0	0	0	0	0
271	4.51667	31	0	0	0	0	0	0	0	0	0	0
272	4.53333	31	0	0	0	0	0	0	0	0	0	0
273	4.55	31	0	0	0	0	0	0	0	0	0	0
274	4.56667	31	0	0	0	0	0	0	0	0	0	0
275	4.58333	31	0	0	0	0	0	0	0	0	0	0
276	4.6	31	0	0	0	0	0	0	0	0	0	0
277	4.61667	31	0	0	0	0	0	0	0	0	0	0
278	4.63333	31	0	0	0	0	0	0	0	0	0	0
279	4.65	31	0	0	0	0	0	0	0	0	0	0
280	4.66667	31	0	0	0	0	0	0	0	0	0	0
281	4.68333	31	0	0	0	0	0	0	0	0	0	0
282	4.7	31	0	0	0	0	0	0	0	0	0	0
283	4.71667	31	0	0	0	0	0	0	0	0	0	0
284	4.73333	31	0	0	0	0	0	0	0	0	0	0
285	4.75	31	0	0	0	0	0	0	0	0	0	0
286	4.76667	31	0	0	0	0	0	0	0	0	0	0
287	4.78333	31	1	0	0	0	0	0	0	0	0	0
288	4.8	31	1	0	0	0	0	0	0	0	0	0
289	4.81667	31	1	0	0	0	0	0	0	0	0	0
290	4.83333	31	1	0	0	0	0	0	0	0	0	0
291	4.85	31	1	0	0	0	0	0	0	0	0	0
292	4.86667	31	1	0	0	0	0	0	0	0	0	0
293	4.88333	31	1	0	0	0	0	0	0	0	0	0
294	4.9	31	1	0	0	0	0	0	0	0	0	0
295	4.91667	31	1	0	0	0	0	0	0	0	0	0
296	4.93333	31	1	0	0	0	0	0	0	0	0	0
297	4.95	31	1	0	0	0	0	0	0	0	0	0
298	4.96667	31	1	0	0	0	0	0	0	0	0	0
299	4.98333	31	1	0	0	0	0	0	0	0	0	0
300	5	31	1	0	0	0	0	0	0	0	0	0
301	5.01667	31	1	0	0	0	0	0	0	0	0	0
302	5.03333	31	1	0	0	0	0	0	0	0	0	0
303	5.05	31	1	0	0	0	0	0	0	0	0	0
304	5.06667	31	1	0	0	0	0	0	0	0	0	0
305	5.08333	31	1	0	0	0	0	0	0	0	0	0
306	5.1	31	1	0	0	0	0	0	0	0	0	0
307	5.11667	31	1	0	0	0	0	0	0	0	0	0
308	5.13333	31	1	0	0	0	0	0	0	0	0	0
309	5.15	31	1	0	0	0	0	0	0	0	0	0
310	5.16667	31	1	0	0	0	0	0	0	0	0	0
311	5.18333	31	1	0	0	0	0	0	0	0	0	0
312	5.2	31	1	0	0	0	0	0	0	0	0	0
313	5.21667	31	1	0	0	0	0	0	0	0	0	0
314	5.23333	31	1	0	0	0	0	0	0	0	0	0
315	5.25	31	1	0	0	0	0	0	0	0	0	0
316	5.26667	31	1	0	0	0	0	0	0	0	0	0
317	5.28333	31	1	0	0	0	0	0	0	0	0	0
318	5.3	31	1	0	0	0	0	0	0	0	0	0
319	5.31667	31	1	0	0	0	0	0	0	0	0	0
320	5.33333	31	1	0	0	0	0	0	0	0	0	0
321	5.35	31	1	0	0	0	0	0	0	0	0	0
322	5.36667	31	1	0	0	0	0	0	0	0	0	0
323	5.38333	31	1	0	0	0	0	0	0	0	0	0
324	5.4	31	1	0	0	0	0	0	0	0	0	0
325	5.41667	31	1	0	0	1	0	0	0	0	0	0
326	5.43333	31	1	0	0	1	0	0	0	0	0	0
327	5.45	31	1	0	0	1	0	0	0	0	0	0
328	5.46667	31	1	0	0	1	0	0	0	0	0	0
329	5.48333	31	1	0	0	1	0	0	0	0	0	0
330	5.5	31	1	0	0	0	0	0	0	0	0	0
331	5.51667	31	1	0	0	0	0	0	0	0	0	0
332	5.53333	31	1	0	0	0	0	0	0	0	0	0
333	5.55	31	1	0	0	0	0	0	0	0	0	0
334	5.56667	31	1	0	0	0	0	0	0	0	0	0
335	5.58333	31	1	0	0	0	0	0	0	0	0	0
336	5.6	31	1	0	0	0	0	0	0	0	0	0
337	5.61667	31	1	0	0	0	0	0	0	0	0	0
338	5.63333	31	1	0	0	0	0	0	0	0	0	0
339	5.65	31	1	0	0	0	0	0	0	0	0	0
340	5.66667	31	1	0	0	0	0	0	0	0	0	0
341	5.68333	31	1	0	0	0	0	0	0	0	0	0
342	5.7	31	1	0	0	0	0	0	0	0	0	0
343	5.71667	31	0	0	0	0	0	0	0	0	0	0
344	5.73333	31	0	0	0	0	0	0	0	0	0	0
345	5.75	31	0	0	0	0	0	0	0	0	0	0
346	5.76667	31	0	0	0	0	0	0	0	0	0	0
347	5.78333	31	0	0	0	0	0	0	0	0	0	0
348	5.8	31	0	0	0	0	0	0	0	0	0	0
349	5.81667	31	0	0	0	0	0	0	0	0	0	0
350	5.83333	31	0	0	0	0	0	0	0	0	0	0
351	5.85	31	0	0	0	0	0	0	0	0	0	0
352	5.86667	31	0	0	0	0	0	0	0	0	0	0
353	5.88333	31	0	0	0	0	0	0	0	0	0	0
354	5.9	31	0	0	0	0	0	0	0	0	0	0
355	5.91667	31	0	0	0	0	0	0	0	0	0	0
356	5.93333	31	0	0	0	0	0	0	0	0	0	0
357	5.95	31	0	0	0	0	0	0	0	0	0	0
358	5.96667	31	0	0	0	0	0	0	0	0	0	0
359	5.98333	31	0	0	0	0	0	0	0	0	0	0
360	6	31	0	0	0	0	0	0	0	0	0	0
361	6.01667	31	1	0	0	0	0	0	0	0	0	0
362	6.03333	31	1	0	0	0	0	0	0	0	0	0
363	6.05	31	1	0	0	0	0	0	0	0	0	0
364	6.06667	31	1	0	0	0	0	0	0	0	0	0
365	6.08333	31	1	0	0	0	0	0	0	0	0	0
366	6.1	31	1	0	0	0	0	0	0	0	0	0
367	6.11667	31	1	0	0	0	0	0	0	0	0	0
368	6.13333	31	1	0	0	0	0	0	0	0	0	0
369	6.15	31	1	0	0	0	0	0	0	0	0	0
370	6.16667	31	1	0	0	0	0	0	0	0	0	0
371	6.18333	31	1	0	0	0	0	0	0	0	0	0
372	6.2	31	1	0	0	0	0	0	0	0	0	0
373	6.21667	31	1	0	0	0	0	0	0	0	0	0
374	6.23333	31	1	1	0	0	0	0	0	0	0	0
375	6.25	31	1	1	0	0	0	0	0	0	0	0
376	6.26667	31	1	1	0	0	0	0	0	0	0	0
377	6.28333	31	1	1	0	0	0	0	0	0	0	0
378	6.3	31	1	1	0	0	0	0	0	0	0	0
379	6.31667	31	1	1	0	0	0	0	0	0	0	0
380	6.33333	31	1	1	0	0	0	0	0	0	0	0
381	6.35	31	1	1	0	0	0	0	0	0	0	0
382	6.36667	31	1	1	0	0	0	0	0	0	0	0
383	6.38333	31	1	1	0	0	0	0	0	0	0	0
384	6.4	31	1	1	0	0	0	0	0	0	0	0
385	6.41667	31	2	0	0	0	0	0	0	0	0	0
386	6.43333	31	2	0	0	0	0	0	0	0	0	0
387	6.45	31	2	0	0	0	0	0	0	0	0	0
388	6.46667	31	3	0	0	0	0	0	0	0	0	0
389	6.48333	31	2	0	0	0	0	0	0	0	0	0
390	6.5	31	2	0	0	0	0	0	0	0	0	0
391	6.51667	31	2	0	0	0	0	0	0	0	0	0
392	6.53333	31	2	0	0	0	0	0	0	0	0	0
393	6.55	31	2	0	0	0	0	0	0	0	0	0
394	6.56667	31	2	0	0	0	0	0	0	0	0	0
395	6.58333	31	2	0	0	0	0	0	0	0	0	0
396	6.6	31	2	0	0	0	0	0	0	0	0	0
397	6.61667	31	2	0	0	0	0	0	0	0	0	0
398	6.63333	31	2	0	0	0	0	0	0	0	0	0
399	6.65	31	2	0	0	0	0	0	0	0	0	0
400	6.66667	31	2	0	0	0	0	0	0	0	0	0
401	6.68333	31	2	0	0	0	0	0	0	0	0	0
402	6.7	31	2	0	0	0	0	0	0	0	0	0
403	6.71667	31	2	0	0	0	0	0	0	0	0	0
404	6.73333	31	2	0	0	0	0	0	0	0	0	0
405	6.75	31	2	0	0	0	0	0	0	0	0	0
406	6.76667	31	2	0	0	0	0	0	0	0	0	0
407	6.78333	31	2	0	0	0	0	0	0	0	0	0
408	6.8	31	2	0	0	0	0	0	0	0	0	0
409	6.81667	31	2	0	0	0	0	0	0	0	0	0
410	6.83333	31	2	0	0	0	0	0	0	0	0	0
411	6.85	31	2	0	0	0	0	0	0	0	0	0
412	6.86667	31	2	0	0	0	0	0	0	0	0	0
413	6.88333	31	2	0	0	0	0	0	0	0	0	0
414	6.9	31	2	0	0	0	0	0	0	0	0	0
415	6.91667	31	2	0	0	0	0	0	0	0	0	0
416	6.93333	31	2	0	0	0	0	0	0	0	0	0
417	6.95	31	2	0	0	0	0	0	0	0	0	0
418	6.96667	31	2	0	0	0	0	0	0	0	0	0
419	6.98333	31	2	0	0	0	0	0	0	0	0	0
420	7	31	2	0	0	0	0	0	0	0	0	0
421	7.01667	31	2	0	0	0	0	0	0	0	0	0
422	7.03333	31	2	0	0	0	0	0	0	0	0	0
423	7.05	31	2	0	0	0	0	0	0	0	0	0
424	7.06667	31	2	0	0	0	0	0	0	0	0	0
425	7.08333	31	2	0	0	0	0	0	0	0	0	0
426	7.1	31	2	0	0	0	0	0	0	0	0	0
427	7.11667	31	2	0	0	0	0	0	0	0	0	0
428	7.13333	31	2	0	0	0	0	0	0	0	0	0
429	7.15	31	2	0	0	0	0	0	0	0	0	0
430	7.16667	31	2	0	0	0	0	0	0	0	0	0
431	7.18333	31	1	0	0	0	0	0	0	0	0	0
432	7.2	31	1	0	0	0	0	0	0	0	0	0
433	7.21667	31	1	0	0	0	0	0	0	0	0	0
434	7.23333	31	1	0	0	0	0	0	0	0	0	0
435	7.25	31	1	0	0	0	0	0	0	0	0	0
436	7.26667	31	1	0	0	0	0	0	0	0	0	0
437	7.28333	31	1	0	0	0	0	0	0	0	0	0
438	7.3	31	1	0	0	0	0	0	0	0	0	0
439	7.31667	31	1	0	0	0	0	0	0	0	0	0
440	7.33333	31	1	0	0	0	0	0	0	0	0	0
441	7.35	31	1	0	0	0	0	0	0	0	0	0
442	7.36667	31	1	0	0	0	0	0	0	0	0	0
443	7.38333	31	1	0	0	0	0	0	0	0	0	0
444	7.4	31	1	0	0	0	0	0	0	0	0	0
445	7.41667	31	1	0	0	0	0	0	0	0	0	0
446	7.43333	31	1	0	0	0	0	0	0	0	0	0
447	7.45	31	1	0	0	0	0	0	0	0	0	0
448	7.46667	31	1	0	0	0	0	0	0	0	0	0
449	7.48333	31	1	0	0	0	0	0	0	0	0	0
450	7.5	31	0	0	0	0	0	0	0	0	0	0
451	7.51667	31	0	0	0	0	0	0	0	0	0	0
452	7.53333	31	0	0	0	0	0	0	0	0	0	0
453	7.55	31	0	0	0	0	0	0	0	0	0	0
454	7.56667	31	0	0	0	0	0	0	0	0	0	0
455	7.58333	31	0	0	0	0	0	0	0	0	0	0
456	7.6	31	0	0	0	0	0	0	0	0	0	0
457	7.61667	31	0	0	0	0	0	0	0	0	0	0
458	7.63333	31	0	0	0	0	0	0	0	0	0	0
459	7.65	31	0	0	0	0	0	0	0	0	0	0
460	7.66667	31	0	0	0	0	0	0	0	0	0	0
461	7.68333	31	0	0	0	0	0	0	0	0	0	0
462	7.7	31	0	0	0	0	0	0	0	0	0	0
463	7.71667	31	0	0	0	0	0	0	0	0	0	0
464	7.73333	31	0	0	0	0	0	0	0	0	0	0
465	7.75	31	0	0	0	0	0	0	0	0	0	0
466	7.76667	31	0	0	0	0	0	0	0	0	0	0
467	7.78333	31	0	0	0	0	0	0	0	0	0	0
468	7.8	31	0	0	0	0	0	0	0	0	0	0
469	7.81667	31	0	0	0	0	0	0	0	0	0	0
470	7.83333	31	0	0	0	0	0	0	0	0	0	0
471	7.85	31	0	0	0	0	0	0	0	0	0	0
472	7.86667	31	0	1	0	0	0	0	0	0	0	0
473	7.88333	31	0	1	0	0	0	0	0	0	0	0
474	7.9	31	0	1	0	0	0	0	0	0	0	0
475	7.91667	31	0	1	0	0	0	0	0	0	0	0
476	7.93333	31	0	1	0	0	0	0	0	0	0	0
477	7.95	31	0	1	0	0	0	0	0	0	0	0
478	7.96667	31	0	1	0	0	0	0	0	0	0	0
479	7.98333	31	0	1	0	0	0	0	0	0	0	0
480	8	31	0	1	0	0	0	0	0	0	0	0
481	8.01667	31	1	1	0	0	0	0	0	0	0	0
482	8.03333	31	1	1	0	0	0	0	0	0	0	0
483	8.05	31	1	1	0	0	0	0	0	0	0	0
484	8.06667	31	1	1	0	0	0	0	0	0	0	0
485	8.08333	31	0	1	0	0	0	0	0	0	0	0
486	8.1	31	0	1	0	0	0	0	0	0	0	0
487	8.11667	31	0	1	0	0	0	0	0	0	0	0
488	8.13333	31	0	1	0	0	0	0	0	0	0	0
489	8.15	31	0	1	0	0	0	0	0	0	0	0
490	8.16667	31	0	1	0	0	0	0	0	0	0	0
491	8.18333	31	0	1	0	0	0	0	0	0	0	0
492	8.2	31	0	1	0	0	0	0	0	0	0	0
493	8.21667	31	0	1	0	0	0	0	0	0	0	0
494	8.23333	31	0	1	0	0	0	0	0	0	0	0
495	8.25	31	0	1	0	0	0	0	0	0	0	0
496	8.26667	31	0	0	0	0	0	0	0	0	0	0
497	8.28333	31	0	0	0	0	0	0	0	0	0	0
498	8.3	31	0	0	0	0	0	0	0	0	0	0
499	8.31667	31	0	0	0	0	0	0	0	0	0	0
500	8.33333	31	0	0	0	0	0	0	0	0	0	0
501	8.35	31	0	0	0	0	0	0	0	0	0	0
502	8.36667	31	0	0	0	0	0	0	0	0	0	0
503	8.38333	31	1	0	0	0	0	0	0	0	0	0
504	8.4	31	1	0	0	0	0	0	0	0	0	0
505	8.41667	31	1	0	0	0	0	0	0	0	0	0
506	8.43333	31	1	0	0	0	0	0	0	0	0	0
507	8.45	31	1	0	0	0	0	0	0	0	0	0
508	8.46667	31	1	0	0	0	0	0	0	0	0	0
509	8.48333	31	1	0	0	0	0	0	0	0	0	0
510	8.5	31	1	0	0	0	0	0	0	0	0	0
511	8.51667	31	1	0	0	0	0	0	0	0	0	0
512	8.53333	31	1	0	0	0	0	0	0	0	0	0
513	8.55	31	1	0	0	0	0	0	0	0	0	0
514	8.56667	31	1	0	0	0	0	0	0	0	0	0
515	8.58333	31	1	0	0	0	0	0	0	0	0	0
516	8.6	31	1	0	0	0	0	0	0	0	0	0
517	8.61667	31	2	0	0	0	0	0	0	0	0	0
518	8.63333	31	2	0	0	0	0	0	0	0	0	0
519	8.65	31	2	0	0	0	0	0	0	0	0	0
520	8.66667	31	2	0	0	0	0	0	0	0	0	0
521	8.68333	31	2	0	0	0	0	0	0	0	0	0
522	8.7	31	2	0	0	0	0	0	0	0	0	0
523	8.71667	31	2	0	0	0	0	0	0	0	0	0
524	8.73333	31	2	0	0	0	0	0	0	0	0	0
525	8.75	31	2	0	0	0	0	0	0	0	0	0
526	8.76667	31	2	0	0	0	0	0	0	0	0	0
527	8.78333	31	2	0	0	0	0	0	0	0	0	0
528	8.8	31	2	0	0	0	0	0	0	0	0	0
529	8.81667	31	2	0	0	0	0	0	0	0	0	0
530	8.83333	31	2	0	0	0	0	0	0	0	0	0
531	8.85	31	2	0	0	0	0	0	0	0	0	0
532	8.86667	31	2	0	0	0	0	0	0	0	0	0
533	8.88333	31	2	0	0	0	0	0	0	0	0	0
534	8.9	31	2	0	0	0	0	0	0	0	0	0
535	8.91667	31	2	0	0	0	0	0	0	0	0	0
536	8.93333	31	2	0	0	0	0	0	0	0	0	0
537	8.95	31	2	0	0	0	0	0	0	0	0	0
538	8.96667	31	2	0	0	0	0	0	0	0	0	0
539	8.98333	31	2	0	0	0	0	0	0	0	0	0
540	9	31	2	0	0	0	0	0	0	0	0	0
541	9.01667	31	2	0	0	0	0	0	0	0	0	0
542	9.03333	31	2	0	0	0	0	0	0	0	0	0
543	9.05	31	1	0	0	0	0	0	0	0	0	0
544	9.06667	31	1	0	0	0	0	0	0	0	0	0
545	9.08333	31	1	0	0	0	0	0	0	0	0	0
546	9.1	31	1	0	0	0	0	0	0	0	0	0
547	9.11667	31	1	0	0	0	0	0	0	0	0	0
548	9.13333	31	1	0	0	0	0	0	0	0	0	0
549	9.15	31	1	0	0	0	0	0	0	0	0	0
550	9.16667	31	1	0	0	0	0	0	0	0	0	0
551	9.18333	31	1	0	0	0	0	0	0	0	0	0
552	9.2	31	1	0	0	0	0	0	0	0	0	0
553	9.21667	31	1	0	0	0	0	0	0	0	0	0
554	9.23333	31	1	0	0	0	0	0	0	0	0	0
555	9.25	31	1	0	0	0	0	0	0	0	0	0
556	9.26667	31	1	0	0	0	0	0	0	0	0	0
557	9.28333	31	1	0	0	0	0	0	0	0	0	0
558	9.3	31	1	0	0	0	0	0	0	0	0	0
559	9.31667	31	1	0	0	0	0	0	0	0	0	0
560	9.33333	31	1	0	0	0	0	0	0	0	0	0
561	9.35	31	1	0	0	0	0	0	0	0	0	0
562	9.36667	31	1	0	0	0	0	0	0	0	0	0
563	9.38333	31	1	0	0	0	0	0	0	0	0	0
564	9.4	31	1	0	0	0	0	0	0	0	0	0
565	9.41667	31	1	0	0	0	0	0	0	0	0	0
566	9.43333	31	1	0	0	0	0	0	0	0	0	0
567	9.45	31	1	0	0	0	0	0	0	0	0	0
568	9.46667	31	1	0	0	0	0	0	0	0	0	0
569	9.48333	31	1	0	0	0	0	0	0	0	0	0
570	9.5	31	0	0	0	0	0	0	0	0	0	0
571	9.51667	31	0	0	0	0	0	0	0	0	0	0
572	9.53333	31	0	0	0	0	0	0	0	0	0	0
573	9.55	31	0	0	0	0	0	0	0	0	0	0
574	9.56667	31	0	0	0	0	0	0	0	0	0	0
575	9.58333	31	0	0	0	0	0	0	0	0	0	0
576	9.6	31	0	0	0	0	0	0	0	0	0	0
577	9.61667	31	0	1	0	0	0	0	0	0	0	0
578	9.63333	31	0	1	0	0	0	0	0	0	0	0
579	9.65	31	0	1	0	0	0	0	0	0	0	0
580	9.66667	31	0	1	0	0	0	0	0	0	0	0
581	9.68333	31	0	1	0	0	0	0	0	0	0	0
582	9.7	31	0	1	0	0	0	0	0	0	0	0
583	9.71667	31	1	1	0	0	0	0	0	0	0	0
584	9.73333	31	1	1	0	0	0	0	0	0	0	0
585	9.75	31	1	1	0	0	0	0	0	0	0	0
586	9.76667	31	1	1	0	0	0	0	0	0	0	0
587	9.78333	31	1	1	0	0	0	0	0	0	0	0
588	9.8	31	1	1	0	0	0	0	0	0	0	0
589	9.81667	31	1	1	0	0	0	0	0	0	0	0
590	9.83333	31	1	1	0	0	0	0	0	0	0	0
591	9.85	31	1	1	0	0	0	0	0	0	0	0
592	9.86667	31	0	1	0	0	0	0	0	0	0	0
593	9.88333	31	0	1	0	0	0	0	0	0	0	0
594	9.9	31	0	1	0	0	0	0	0	0	0	0
595	9.91667	31	0	1	0	0	0	0	0	0	0	0
596	9.93333	31	0	1	0	0	0	0	0	0	0	0
597	9.95	31	0	1	0	0	0	0	0	0	0	0
598	9.96667	31	0	1	0	0	0	0	0	0	0	0
599	9.98333	31	0	1	0	0	0	0	0	0	0	0
600	10	31	0	1	0	0	0	0	0	0	0	0
601	10.0167	31	0	1	0	0	0	0	0	0	0	0
602	10.0333	31	0	1	0	0	0	0	0	0	0	0
603	10.05	31	0	1	0	0	0	0	0	0	0	0
604	10.0667	31	0	1	0	0	0	0	0	0	0	0
605	10.0833	31	0	1	0	0	0	0	0	0	0	0
606	10.1	31	0	1	0	0	0	0	0	0	0	0
607	10.1167	31	0	1	0	0	0	0	0	0	0	0
608	10.1333	31	0	1	0	0	0	0	0	0	0	0
609	10.15	31	0	1	0	0	0	0	0	0	0	0
610	10.1667	31	0	1	0	0	0	0	0	0	0	0
611	10.1833	31	0	1	0	0	0	0	0	0	0	0
612	10.2	31	0	1	0	0	0	0	0	0	0	0
613	10.2167	31	0	0	0	0	0	0	0	0	0	0
614	10.2333	31	0	0	0	0	0	0	0	0	0	0
615	10.25	31	0	0	0	0	0	0	0	0	0	0
616	10.2667	31	0	0	0	0	0	0	0	0	0	0
617	10.2833	31	0	0	0	0	0	0	0	0	0	0
618	10.3	31	0	0	0	0	0	0	0	0	0	0
619	10.3167	31	0	0	0	0	0	0	0	0	0	0
620	10.3333	31	0	0	0	0	0	0	0	0	0	0
621	10.35	31	0	0	0	0	0	0	0	0	0	0
622	10.3667	31	0	0	0	0	0	0	0	0	0	0
623	10.3833	31	0	0	0	0	0	0	0	0	0	0
624	10.4	31	0	0	0	0	0	0	0	0	0	0
625	10.4167	31	0	0	0	0	0	0	0	0	0	0
626	10.4333	31	0	0	0	0	0	0	0	0	0	0
627	10.45	31	0	0	0	0	0	0	0	0	0	0
628	10.4667	31	0	0	0	0	0	0	0	0	0	0
629	10.4833	31	0	0	0	0	0	0	0	0	0	0
630	10.5	31	0	0	0	0	0	0	0	0	0	0
631	10.5167	31	0	0	0	0	0	0	0	0	0	0
632	10.5333	31	0	0	0	0	0	0	0	0	0	0
633	10.55	31	0	0	0	0	0	0	0	0	0	0
634	10.5667	31	0	0	0	0	0	0	0	0	0	0
635	10.5833	31	0	0	0	0	0	0	0	0	0	0
636	10.6	31	0	0	0	0	0	0	0	0	0	0
637	10.6167	31	0	0	0	0	0	0	0	0	0	0
638	10.6333	31	0	0	0	0	0	0	0	0	0	0
639	10.65	31	0	0	0	0	0	0	0	0	0	0
640	10.6667	31	0	0	0	0	0	0	0	0	0	0
641	10.6833	31	0	0	0	0	0	0	0	0	0	0
642	10.7	31	0	0	0	0	0	0	0	0	0	0
643	10.7167	31	1	0	0	0	0	0	0	0	0	0
644	10.7333	31	1	0	0	0	0	0	0	0	0	0
645	10.75	31	1	0	0	0	0	0	0	0	0	0
646	10.7667	31	1	0	0	0	0	0	0	0	0	0
647	10.7833	31	1	0	0	0	0	0	0	0	0	0
648	10.8	31	1	0	0	0	0	0	0	0	0	0
649	10.8167	31	1	0	0	0	0	0	0	0	0	0
650	10.8333	31	1	0	0	0	0	0	0	0	0	0
651	10.85	31	1	0	0	0	0	0	0	0	0	0
652	10.8667	31	1	0	0	0	0	0	0	0	0	0
653	10.8833	31	1	0	0	0	0	0	0	0	0	0
654	10.9	31	1	0	0	0	0	0	0	0	0	0
655	10.9167	31	1	0	0	0	0	0	0	0	0	0
656	10.9333	31	1	0	0	0	0	0	0	0	0	0
657	10.95	31	1	0	0	0	0	0	0	0	0	0
658	10.9667	31	1	0	0	0	0	0	0	0	0	0
659	10.9833	31	1	0	0	0	0	0	0	0	0	0
660	11	31	1	0	0	0	0	0	0	0	0	0
661	11.0167	31	2	1	0	0	0	0	0	0	0	0
662	11.0333	31	2	1	0	0	0	0	0	0	0	0
663	11.05	31	2	1	0	0	0	0	0	0	0	0
664	11.0667	31	2	1	0	0	0	0	0	0	0	0
665	11.0833	31	2	1	0	0	0	0	0	0	0	0
666	11.1	31	2	1	0	0	0	0	0	0	0	0
667	11.1167	31	1	1	0	0	0	0	0	0	0	0
668	11.1333	31	1	1	0	0	0	0	0	0	0	0
669	11.15	31	1	1	0	0	0	0	0	0	0	0
670	11.1667	31	1	1	0	0	0	0	0	0	0	0
671	11.1833	31	1	1	0	0	0	0	0	0	0	0
672	11.2	31	1	1	0	0	0	0	0	0	0	0
673	11.2167	31	1	1	0	0	0	0	0	0	0	0
674	11.2333	31	1	1	0	0	0	0	0	0	0	0
675	11.25	31	1	1	0	0	0	0	0	0	0	0
676	11.2667	31	1	1	0	0	0	0	0	0	0	0
677	11.2833	31	1	1	0	0	0	0	0	0	0	0
678	11.3	31	1	1	0	0	0	0	0	0	0	0
679	11.3167	31	1	1	0	0	0	0	0	0	0	0
680	11.3333	31	1	1	0	0	0	0	0	0	0	0
681	11.35	31	1	1	0	0	0	0	0	0	0	0
682	11.3667	31	1	1	0	0	0	0	0	0	0	0
683	11.3833	31	1	1	0	0	0	0	0	0	0	0
684	11.4	31	1	1	0	0	0	0	0	0	0	0
685	11.4167	31	1	1	0	0	0	0	0	0	0	0
686	11.4333	31	1	1	0	0	0	0	0	0	0	0
687	11.45	31	1	1	0	0	0	0	0	0	0	0
688	11.4667	31	1	1	0	0	0	0	0	0	0	0
689	11.4833	31	1	1	0	0	0	0	0	0	0	0
690	11.5	31	1	1	0	0	0	0	0	0	0	0
691	11.5167	31	1	1	0	0	0	0	0	0	0	0
692	11.5333	31	1	1	0	0	0	0	0	0	0	0
693	11.55	31	1	1	0	0	0	0	0	0	0	0
694	11.5667	31	1	1	0	0	0	0	0	0	0	0
695	11.5833	31	2	1	0	0	0	0	0	0	0	0
696	11.6	31	2	1	0	0	0	0	0	0	0	0
697	11.6167	31	2	1	0	0	0	0	0	0	0	0
698	11.6333	31	2	1	0	0	0	0	0	0	0	0
699	11.65	31	2	1	0	0	0	0	0	0	0	0
700	11.6667	31	3	1	0	0	0	0	0	0	0	0
701	11.6833	31	3	1	0	0	0	0	0	0	0	0
702	11.7	31	3	1	0	0	0	0	0	0	0	0
703	11.7167	31	3	1	0	0	0	0	0	0	0	0
704	11.7333	31	3	1	0	0	0	0	0	0	0	0
705	11.75	31	3	1	0	0	0	0	0	0	0	0
706	11.7667	31	3	1	0	0	0	0	0	0	0	0
707	11.7833	31	3	1	0	0	0	0	0	0	0	0
708	11.8	31	3	1	0	0	0	0	0	0	0	0
709	11.8167	31	3	1	0	0	0	0	0	0	0	0
710	11.8333	31	3	1	0	0	0	0	0	0	0	0
711	11.85	31	3	1	0	0	0	0	0	0	0	0
712	11.8667	31	3	1	0	0	0	0	0	0	0	0
713	11.8833	31	3	0	0	0	0	0	0	0	0	0
714	11.9	31	3	0	0	0	0	0	0	0	0	0
715	11.9167	31	3	0	0	0	0	0	0	0	0	0
716	11.9333	31	3	0	0	0	0	0	0	0	0	0
717	11.95	31	3	0	0	0	0	0	0	0	0	0
718	11.9667	31	3	0	0	0	0	0	0	0	0	0
719	11.9833	31	3	0	0	0	0	0	0	0	0	0
720	12	31	3	0	0	0	0	0	0	0	0	0
721	12.0167	2	3	0	0	0	0	0	0	0	0	0
722	12.0333	2	3	0	0	0	0	0	0	0	0	0
723	12.05	2	3	0	0	0	0	0	0	0	0	0
724	12.0667	2	3	0	0	0	0	0	0	0	0	0
725	12.0833	2	2	0	0	0	0	0	0	0	0	0
726	12.1	2	2	0	0	0	0	0	0	0	0	0
727	12.1167	2	2	0	0	0	0	0	0	0	0	0
728	12.1333	2	2	0	0	0	0	0	0	0	0	0
729	12.15	2	2	0	0	0	0	0	0	0	0	0
730	12.1667	2	2	0	0	0	0	0	0	0	0	0
731	12.1833	2	2	0	0	0	0	0	0	0	0	0
732	12.2	2	2	0	0	0	0	0	0	0	0	0
733	12.2167	2	2	0	0	0	0	0	0	0	0	0
734	12.2333	2	2	0	0	0	0	0	0	0	0	0
735	12.25	2	2	0	0	0	0	0	0	0	0	0
736	12.2667	2	2	0	0	0	0	0	0	0	0	0
737	12.2833	2	2	0	0	0	0	0	0	0	0	0
738	12.3	2	2	0	0	0	0	0	0	0	0	0
739	12.3167	2	2	0	0	0	0	0	0	0	0	0
740	12.3333	2	2	0	0	0	0	0	0	0	0	0
741	12.35	2	2	0	0	0	0	0	0	0	0	0
742	12.3667	2	2	0	0	0	0	0	0	0	0	0
743	12.3833	2	2	0	0	0	0	0	0	0	0	0
744	12.4	2	2	0	0	0	0	0	0	0	0	0
745	12.4167	2	2	0	0	0	0	0	0	0	0	0
746	12.4333	2	2	0	0	0	0	0	0	0	0	0
747	12.45	2	2	0	0	0	0	0	0	0	0	0
748	12.4667	2	2	0	0	0	0	0	0	0	0	0
749	12.4833	2	2	0	0	0	0	0	0	0	0	0
750	12.5	2	2	0	0	0	0	0	0	0	0	0
751	12.5167	2	2	0	0	0	0	0	0	0	0	0
752	12.5333	2	2	0	0	0	0	0	0	0	0	0
753	12.55	2	2	0	0	0	0	0	0	0	0	0
754	12.5667	2	2	0	0	0	0	0	0	0	0	0
755	12.5833	2	2	0	0	0	0	0	0	0	0	0
756	12.6	2	2	0	0	0	0	0	0	0	0	0
757	12.6167	2	2	0	0	0	0	0	0	0	0	0
758	12.6333	2	2	0	0	0	0	0	0	0	0	0
759	12.65	2	2	0	0	0	0	0	0	0	0	0
760	12.6667	2	2	0	0	0	0	0	0	0	0	0
761	12.6833	2	2	0	0	0	0	0	0	0	0	0
762	12.7	2	2	0	0	0	0	0	0	0	0	0
763	12.7167	2	2	0	0	0	0	0	0	0	0	0
764	12.7333	2	2	0	0	0	0	0	0	0	0	0
765	12.75	2	2	0	0	0	0	0	0	0	0	0
766	12.7667	2	2	0	0	0	0	0	0	0	0	0
767	12.7833	2	2	0	0	0	0	0	0	0	0	0
768	12.8	2	2	0	0	0	0	0	0	0	0	0
769	12.8167	2	2	0	0	0	0	0	0	0	0	0
770	12.8333	2	2	0	0	0	0	0	0	0	0	0
771	12.85	2	2	0	0	0	0	0	0	0	0	0
772	12.8667	2	2	0	0	0	0	0	0	0	0	0
773	12.8833	2	2	0	0	0	0	0	0	0	0	0
774	12.9	2	2	0	0	0	0	0	0	0	0	0
775	12.9167	2	2	0	0	0	0	0	0	0	0	0
776	12.9333	2	2	0	0	0	0	0	0	0	0	0
777	12.95	2	2	0	0	0	0	0	0	0	0	0
778	12.9667	2	2	0	0	0	0	0	0	0	0	0
779	12.9833	2	2	0	0	0	0	0	0	0	0	0
780	13	2	2	0	0	0	0	0	0	0	0	0
781	13.0167	2	2	0	0	0	0	0	0	0	0	0
782	13.0333	2	2	0	0	0	0	0	0	0	0	0
783	13.05	2	2	0	0	0	0	0	0	0	0	0
784	13.0667	2	2	0	0	0	0	0	0	0	0	0
785	13.0833	2	2	0	0	0	0	0	0	0	0	0
786	13.1	2	2	0	0	0	0	0	0	0	0	0
787	13.1167	2	2	0	0	0	0	0	0	0	0	0
788	13.1333	2	2	0	0	0	0	0	0	0	0	0
789	13.15	2	2	0	0	0	0	0	0	0	0	0
790	13.1667	2	2	0	0	0	0	0	0	0	0	0
791	13.1833	2	2	0	0	0	0	0	0	0	0	0
792	13.2	2	1	0	0	0	0	0	0	0	0	0
793	13.2167	2	1	0	0	0	0	0	0	0	0	0
794	13.2333	2	1	0	0	0	0	0	0	0	0	0
795	13.25	2	1	0	0	0	0	0	0	0	0	0
796	13.2667	2	1	0	0	0	0	0	0	0	0	0
797	13.2833	2	1	0	0	0	0	0	0	0	0	0
798	13.3	2	1	0	0	0	0	0	0	0	0	0
799	13.3167	2	1	0	0	0	0	0	0	0	0	0
800	13.3333	2	1	0	0	0	0	0	0	0	0	0
801	13.35	2	1	0	0	0	0	0	0	0	0	0
802	13.3667	2	1	0	0	0	0	0	0	0	0	0
803	13.3833	2	1	0	0	0	0	0	0	0	0	0
804	13.4	2	1	0	0	0	0	0	0	0	0	0
805	13.4167	2	1	0	0	0	0	0	0	0	0	0
806	13.4333	2	1	0	0	0	0	0	0	0	0	0
807	13.45	2	1	0	0	0	0	0	0	0	0	0
808	13.4667	2	1	0	0	0	0	0	0	0	0	0
809	13.4833	2	1	0	0	0	0	0	0	0	0	0
810	13.5	2	1	0	0	0	0	0	0	0	0	0
811	13.5167	2	1	0	0	0	0	0	0	0	0	0
812	13.5333	2	1	0	0	0	0	0	0	0	0	0
813	13.55	2	1	0	0	0	0	0	0	0	0	0
814	13.5667	2	1	0	0	0	0	0	0	0	0	0
815	13.5833	2	0	0	0	0	0	0	0	0	0	0
816	13.6	2	0	0	0	0	0	0	0	0	0	0
817	13.6167	2	0	0	0	0	0	0	0	0	0	0
818	13.6333	2	0	0	0	0	0	0	0	0	0	0
819	13.65	2	0	0	0	0	0	0	0	0	0	0
820	13.6667	2	0	0	0	0	0	0	0	0	0	0
821	13.6833	2	0	0	0	0	0	0	0	0	0	0
822	13.7	2	0	0	0	0	0	0	0	0	0	0
823	13.7167	2	0	0	0	0	0	0	0	0	0	0
824	13.7333	2	0	0	0	0	0	0	0	0	0	0
825	13.75	2	0	0	0	0	0	0	0	0	0	0
826	13.7667	2	0	0	0	0	0	0	0	0	0	0
827	13.7833	2	0	0	0	0	0	0	0	0	0	0
828	13.8	2	0	0	0	0	0	0	0	0	0	0
829	13.8167	2	0	0	0	0	0	0	0	0	0	0
830	13.8333	2	0	0	0	0	0	0	0	0	0	0
831	13.85	2	0	0	0	0	0	0	0	0	0	0
832	13.8667	2	0	0	0	0	0	0	0	0	0	0
833	13.8833	2	0	0	0	0	0	0	0	0	0	0
834	13.9	2	0	0	0	0	0	0	0	0	0	0
835	13.9167	2	0	0	0	0	0	0	0	0	0	0
836	13.9333	2	0	0	0	0	0	0	0	0	0	0
837	13.95	2	0	0	0	0	0	0	0	0	0	0
838	13.9667	2	0	0	0	0	0	0	0	0	0	0
839	13.9833	2	0	0	0	0	0	0	0	0	0	0
840	14	2	0	0	0	0	0	0	0	0	0	0
841	14.0167	2	1	0	0	0	0	0	0	0	0	0
842	14.0333	2	1	0	0	0	0	0	0	0	0	0
843	14.05	2	1	0	0	0	0	0	0	0	0	0
844	14.0667	2	1	0	0	0	0	0	0	0	0	0
845	14.0833	2	1	0	0	0	0	0	0	0	0	0
846	14.1	2	1	0	0	0	0	0	0	0	0	0
847	14.1167	2	1	0	0	0	0	0	0	0	0	0
848	14.1333	2	1	0	0	0	0	0	0	0	0	0
849	14.15	2	1	0	0	0	0	0	0	0	0	0
850	14.1667	2	1	0	0	0	0	0	0	0	0	0
851	14.1833	2	1	0	0	0	0	0	0	0	0	0
852	14.2	2	1	0	0	0	0	0	0	0	0	0
853	14.2167	2	1	0	0	0	0	0	0	0	0	0
854	14.2333	2	1	0	0	0	0	0	0	0	0	0
855	14.25	2	1	0	0	0	0	0	0	0	0	0
856	14.2667	2	1	0	0	0	0	0	0	0	0	0
857	14.2833	2	1	1	0	0	0	0	0	0	0	0
858	14.3	2	1	1	0	0	0	0	0	0	0	0
859	14.3167	2	1	1	0	0	0	0	0	0	0	0
860	14.3333	2	1	1	0	0	0	0	0	0	0	0
861	14.35	2	1	1	0	0	0	0	0	0	0	0
862	14.3667	2	1	1	0	0	0	0	0	0	0	0
863	14.3833	2	1	1	0	0	0	0	0	0	0	0
864	14.4	2	1	1	0	0	0	0	0	0	0	0
865	14.4167	2	1	1	0	0	0	0	0	0	0	0
866	14.4333	2	1	1	0	0	0	0	0	0	0	0
867	14.45	2	1	1	0	0	0	0	0	0	0	0
868	14.4667	2	1	1	0	0	0	0	0	0	0	0
869	14.4833	2	1	1	0	0	0	0	0	0	0	0
870	14.5	2	1	1	0	0	0	0	0	0	0	0
871	14.5167	2	1	1	0	0	0	0	0	0	0	0
872	14.5333	2	1	1	0	0	0	0	0	0	0	0
873	14.55	2	1	0	0	0	0	0	0	0	0	0
874	14.5667	2	1	0	0	0	0	0	0	0	0	0
875	14.5833	2	1	0	0	0	0	0	0	0	0	0
876	14.6	2	1	0	0	0	0	0	0	0	0	0
877	14.6167	2	1	0	0	0	0	0	0	0	0	0
878	14.6333	2	1	0	0	0	0	0	0	0	0	0
879	14.65	2	1	0	0	0	0	0	0	0	0	0
880	14.6667	2	1	0	0	0	0	0	0	0	0	0
881	14.6833	2	1	0	0	0	0	0	0	0	0	0
882	14.7	2	1	0	0	0	0	0	0	0	0	0
883	14.7167	2	1	0	0	0	0	0	0	0	0	0
884	14.7333	2	1	0	0	0	0	0	0	0	0	0
885	14.75	2	1	0	0	0	0	0	0	0	0	0
886	14.7667	2	1	0	0	0	0	0	0	0	0	0
887	14.7833	2	1	0	0	0	0	0	0	0	0	0
888	14.8	2	1	0	0	0	0	0	0	0	0	0
889	14.8167	2	0	0	0	0	0	0	0	0	0	0
890	14.8333	2	0	0	0	0	0	0	0	0	0	0
891	14.85	2	0	0	0	0	0	0	0	0	0	0
892	14.8667	2	0	0	0	0	0	0	0	0	0	0
893	14.8833	2	0	0	0	0	0	0	0	0	0	0
894	14.9	2	0	0	0	0	0	0	0	0	0	0
895	14.9167	2	0	0	0	0	0	0	0	0	0	0
896	14.9333	2	0	0	0	0	0	0	0	0	0	0
897	14.95	2	0	0	0	0	0	0	0	0	0	0
898	14.9667	2	0	0	0	0	0	0	0	0	0	0
899	14.9833	2	0	0	0	0	0	0	0	0	0	0
900	15	2	0	0	0	0	0	0	0	0	0	0
901	15.0167	2	0	0	0	0	0	0	0	0	0	0
902	15.0333	2	0	0	0	0	0	0	0	0	0	0
903	15.05	2	0	0	0	0	0	0	0	0	0	0
904	15.0667	2	0	0	0	0	0	0	0	0	0	0
905	15.0833	2	0	0	0	0	0	0	0	0	0	0
906	15.1	2	0	0	0	0	0	0	0	0	0	0
907	15.1167	2	0	0	0	0	0	0	0	0	0	0
908	15.1333	2	0	0	0	0	0	0	0	0	0	0
909	15.15	2	0	0	0	0	0	0	0	0	0	0
910	15.1667	2	0	0	0	0	0	0	0	0	0	0
911	15.1833	2	0	0	0	0	0	0	0	0	0	0
912	15.2	2	0	0	0	0	0	0	0	0	0	0
913	15.2167	2	0	0	0	0	0	0	0	0	0	0
914	15.2333	2	0	0	0	0	0	0	0	0	0	0
915	15.25	2	0	0	0	0	0	0	0	0	0	0
916	15.2667	2	0	0	0	0	0	0	0	0	0	0
917	15.2833	2	0	0	0	0	0	0	0	0	0	0
918	15.3	2	0	0	0	0	0	0	0	0	0	0
919	15.3167	2	0	0	0	0	0	0	0	0	0	0
920	15.3333	2	0	0	0	0	0	0	0	0	0	0
921	15.35	2	0	0	0	0	0	0	0	0	0	0
922	15.3667	2	0	0	0	0	0	0	0	0	0	0
923	15.3833	2	0	0	0	0	0	0	0	0	0	0
924	15.4	2	0	0	0	0	0	0	0	0	0	0
925	15.4167	2	0	0	0	0	0	0	0	0	0	0
926	15.4333	2	0	0	0	0	0	0	0	0	0	0
927	15.45	2	0	0	0	0	0	0	0	0	0	0
928	15.4667	2	0	0	0	0	0	0	0	0	0	0
929	15.4833	2	0	0	0	0	0	0	0	0	0	0
930	15.5	2	0	0	0	0	0	0	0	0	0	0
931	15.5167	2	0	0	0	0	0	0	0	0	0	0
932	15.5333	2	0	0	0	0	0	0	0	0	0	0
933	15.55	2	0	0	0	0	0	0	0	0	0	0
934	15.5667	2	0	0	0	0	0	0	0	0	0	0
935	15.5833	2	0	0	0	0	0	0	0	0	0	0
936	15.6	2	0	0	0	0	0	0	0	0	0	0
937	15.6167	2	0	0	0	0	0	0	0	0	0	0
938	15.6333	2	0	0	0	0	0	0	0	0	0	0
939	15.65	2	0	0	0	0	0	0	0	0	0	0
940	15.6667	2	0	0	0	0	0	0	0	0	0	0
941	15.6833	2	0	0	0	0	0	0	0	0	0	0
942	15.7	2	0	0	0	0	0	0	0	0	0	0
943	15.7167	2	0	0	0	0	0	0	0	0	0	0
944	15.7333	2	0	0	2	0	0	0	0	0	0	0
945	15.75	2	0	0	2	0	0	0	0	0	0	0
946	15.7667	2	0	0	2	0	0	0	0	0	0	0
947	15.7833	2	0	0	2	0	0	0	0	0	0	0
948	15.8	2	0	0	2	0	0	0	0	0	0	0
949	15.8167	2	0	0	2	0	0	0	0	0	0	0
950	15.8333	2	0	0	2	0	0	0	0	0	0	0
951	15.85	2	0	0	2	0	0	0	0	0	0	0
952	15.8667	2	0	0	2	0	0	0	0	0	0	0
953	15.8833	2	0	0	2	0	0	0	0	0	0	0
954	15.9	2	0	0	2	0	0	0	0	0	0	0
955	15.9167	2	0	0	2	0	0	0	0	0	0	0
956	15.9333	2	0	0	0	0	0	0	0	0	0	0
957	15.95	2	0	0	0	0	0	0	0	0	0	0
958	15.9667	2	0	0	0	0	0	0	0	0	0	0
959	15.9833	2	0	0	0	0	0	0	0	0	0	0
960	16	2	0	0	0	0	0	0	0	0	0	0
961	16.0167	2	0	0	0	0	0	0	0	0	0	0
962	16.0333	2	0	0	0	0	0	0	0	0	0	0
963	16.05	2	0	0	0	0	0	0	0	0	0	0
964	16.0667	2	0	0	0	0	0	0	0	0	0	0
965	16.0833	2	0	0	0	0	0	0	0	0	0	0
966	16.1	2	0	0	0	0	0	0	0	0	0	0
967	16.1167	2	0	0	0	0	0	0	0	0	0	0
968	16.1333	2	0	0	0	0	0	0	0	0	0	0
969	16.15	2	0	0	0	0	0	0	0	0	0	0
970	16.1667	2	0	0	0	0	0	0	0	0	0	0
971	16.1833	2	0	0	0	0	0	0	0	0	0	0
972	16.2	2	0	0	0	0	0	0	0	0	0	0
973	16.2167	2	0	0	0	0	0	0	0	0	0	0
974	16.2333	2	0	0	0	0	0	0	0	0	0	0
975	16.25	2	0	0	0	0	0	0	0	0	0	0
976	16.2667	2	0	0	0	0	0	0	0	0	0	0
977	16.2833	2	0	0	0	0	0	0	0	0	0	0
978	16.3	2	0	0	0	0	0	0	0	0	0	0
979	16.3167	2	0	0	0	0	0	0	0	0	0	0
980	16.3333	2	0	0	0	0	0	0	0	0	0	0
981	16.35	2	0	0	0	0	0	0	0	0	0	0
982	16.3667	2	0	0	0	0	0	0	0	0	0	0
983	16.3833	2	0	0	0	0	0	0	0	0	0	0
984	16.4	2	0	0	0	0	0	0	0	0	0	0
985	16.4167	2	0	0	0	0	0	0	0	0	0	0
986	16.4333	2	0	0	0	0	0	0	0	0	0	0
987	16.45	2	0	0	0	0	0	0	0	0	0	0
988	16.4667	2	0	0	0	0	0	0	0	0	0	0
989	16.4833	2	0	0	0	0	0	0	0	0	0	0
990	16.5	2	0	0	0	0	0	0	0	0	0	0
991	16.5167	2	0	0	0	0	0	0	0	0	0	0
992	16.5333	2	0	0	0	0	0	0	0	0	0	0
993	16.55	2	0	0	0	0	0	0	0	0	0	0
994	16.5667	2	0	0	0	0	0	0	0	0	0	0
995	16.5833	2	0	0	0	0	0	0	0	0	0	0
996	16.6	2	0	0	0	0	0	0	0	0	0	0
997	16.6167	2	0	0	0	0	0	0	0	0	0	0
998	16.6333	2	0	0	0	0	0	0	0	0	0	0
999	16.65	2	0	0	0	0	0	0	0	0	0	0
1000	16.6667	2	0	1	0	0	0	0	0	0	0	0
1001	16.6833	2	0	1	0	0	0	0	0	0	0	0
1002	16.7	2	0	1	0	0	0	0	0	0	0	0
1003	16.7167	2	0	1	0	0	0	0	0	0	0	0
1004	16.7333	2	0	1	0	0	0	0	0	0	0	0
1005	16.75	2	0	0	0	0	0	0	0	0	0	0
1006	16.7667	2	0	0	0	0	0	0	0	0	0	0
1007	16.7833	2	0	0	0	0	0	0	0	0	0	0
1008	16.8	2	0	0	0	0	0	0	0	0	0	0
1009	16.8167	2	0	0	0	0	0	0	0	0	0	0
1010	16.8333	2	0	0	0	0	0	0	0	0	0	0
1011	16.85	2	0	0	0	0	0	0	0	0	0	0
1012	16.8667	2	1	0	0	0	0	0	0	0	0	0
1013	16.8833	2	1	0	0	0	1	0	0	0	0	0
1014	16.9	2	1	0	0	0	2	0	0	0	0	0
1015	16.9167	2	1	0	0	0	2	0	0	0	0	0
1016	16.9333	2	1	0	0	0	2	0	0	0	0	0
1017	16.95	2	1	0	0	0	2	0	0	0	0	0
1018	16.9667	2	1	0	0	0	2	0	0	0	0	0
1019	16.9833	2	1	0	0	0	2	0	0	0	0	0
1020	17	2	1	0	0	0	2	0	0	0	0	0
1021	17.0167	2	1	0	0	0	2	0	0	0	0	0
1022	17.0333	2	1	0	0	0	0	0	0	0	0	0
1023	17.05	2	1	0	0	0	0	0	0	0	0	0
1024	17.0667	2	1	0	0	0	0	0	0	0	0	0
1025	17.0833	2	1	0	0	0	0	0	0	0	0	0
1026	17.1	2	1	0	0	0	0	0	0	0	0	0
1027	17.1167	2	1	0	0	0	0	0	0	0	0	0
1028	17.1333	2	1	0	0	0	0	0	0	0	0	0
1029	17.15	2	1	0	0	0	0	0	0	0	0	0
1030	17.1667	2	1	0	0	0	0	0	0	0	0	0
1031	17.1833	2	1	0	0	0	0	0	0	0	0	0
1032	17.2	2	1	0	0	0	0	0	0	0	0	0
1033	17.2167	2	1	0	0	0	0	0	0	0	0	0
1034	17.2333	2	1	0	0	0	0	0	0	0	0	0
1035	17.25	2	1	0	0	0	0	0	0	0	0	0
1036	17.2667	2	1	0	0	0	0	0	0	0	0	0
1037	17.2833	2	1	0	0	0	0	0	0	0	0	0
1038	17.3	2	1	0	0	0	0	0	0	0	0	0
1039	17.3167	2	1	0	0	0	0	0	0	0	0	0
1040	17.3333	2	1	0	0	0	0	0	0	0	0	0
1041	17.35	2	1	0	0	0	0	0	0	0	0	0
1042	17.3667	2	1	0	0	0	0	0	0	0	0	0
1043	17.3833	2	1	0	0	0	0	0	0	0	0	0
1044	17.4	2	1	0	0	0	0	0	0	0	0	0
1045	17.4167	2	1	0	0	0	0	1	0	0	0	0
1046	17.4333	2	1	0	0	0	0	2	0	0	0	0
1047	17.45	2	1	0	0	0	0	1	0	0	0	0
1048	17.4667	2	1	1	0	0	0	0	0	0	0	0
1049	17.4833	2	1	1	0	0	0	0	0	0	0	0
1050	17.5	2	1	1	0	0	0	0	0	0	0	0
1051	17.5167	2	1	1	0	0	0	0	0	0	0	0
1052	17.5333	2	1	1	0	0	0	0	0	0	0	0
1053	17.55	2	1	0	0	0	0	0	0	0	0	0
1054	17.5667	2	1	0	0	0	0	0	0	0	0	0
1055	17.5833	2	1	0	0	0	0	0	0	0	0	0
1056	17.6	2	1	0	0	0	0	0	0	0	0	0
1057	17.6167	2	1	0	0	0	0	0	0	0	0	0
1058	17.6333	2	1	0	1	0	0	0	0	0	0	0
1059	17.65	2	1	0	1	0	0	0	0	0	0	0
1060	17.6667	2	1	0	1	0	0	0	0	0	0	0
1061	17.6833	2	1	0	1	0	0	0	0	0	0	0
1062	17.7	2	1	0	1	0	0	0	0	0	0	0
1063	17.7167	2	1	0	1	0	0	0	0	0	0	0
1064	17.7333	2	1	0	1	0	0	0	0	0	0	0
1065	17.75	2	1	0	1	0	0	0	0	0	0	0
1066	17.7667	2	1	0	1	0	0	0	0	0	0	0
1067	17.7833	2	1	0	1	0	0	0	0	0	0	0
1068	17.8	2	1	0	2	0	0	0	0	0	0	0
1069	17.8167	2	1	0	2	0	0	0	0	0	0	0
1070	17.8333	2	1	0	2	0	0	0	0	0	0	0
1071	17.85	2	1	0	2	0	0	0	0	0	0	0
1072	17.8667	2	0	0	2	0	0	0	0	0	0	0
1073	17.8833	2	0	0	2	0	0	0	0	0	0	0
1074	17.9	2	0	0	2	0	0	0	0	0	0	0
1075	17.9167	2	0	0	2	0	0	0	0	0	0	0
1076	17.9333	2	0	0	2	0	0	0	0	0	0	0
1077	17.95	2	0	0	2	0	0	0	0	0	0	0
1078	17.9667	2	0	0	3	0	0	0	0	0	0	0
1079	17.9833	2	0	0	3	0	0	0	0	0	0	0
1080	18	2	0	0	3	0	0	0	0	0	0	0
1081	18.0167	2	0	0	3	0	0	0	0	0	0	0
1082	18.0333	2	0	0	3	0	0	0	0	0	0	0
1083	18.05	2	0	0	3	0	0	0	0	0	0	0
1084	18.0667	2	0	0	3	0	0	0	0	0	0	0
1085	18.0833	2	0	0	3	0	0	0	0	0	0	0
1086	18.1	2	0	0	3	0	0	0	0	0	0	0
1087	18.1167	2	0	0	3	0	0	0	0	0	0	0
1088	18.1333	2	0	0	2	0	0	0	0	0	0	0
1089	18.15	2	0	0	2	0	0	0	0	0	0	0
1090	18.1667	2	0	0	2	0	0	0	0	0	0	0
1091	18.1833	2	0	0	2	0	0	0	0	0	0	0
1092	18.2	2	0	0	2	0	0	0	0	0	0	0
1093	18.2167	2	0	1	2	0	0	0	0	0	0	0
1094	18.2333	2	0	1	2	0	0	0	0	0	0	0
1095	18.25	2	0	1	2	0	0	0	0	0	0	0
1096	18.2667	2	0	1	2	0	0	0	0	0	0	0
1097	18.2833	2	0	1	2	0	0	0	0	0	0	0
1098	18.3	2	0	1	1	0	0	0	0	0	0	0
1099	18.3167	2	0	1	1	0	0	0	0	0	0	0
1100	18.3333	2	0	0	1	0	0	0	1	0	0	0
1101	18.35	2	0	0	1	0	0	0	1	0	0	0
1102	18.3667	2	0	0	1	0	0	0	0	0	0	0
1103	18.3833	2	0	0	1	0	0	0	0	0	0	0
1104	18.4	2	0	0	1	0	0	0	0	0	0	0
1105	18.4167	2	0	0	1	0	0	0	0	0	0	0
1106	18.4333	2	0	0	1	0	0	0	0	0	0	0
1107	18.45	2	0	0	1	0	0	0	0	0	0	0
1108	18.4667	2	0	0	0	0	0	0	0	0	0	0
1109	18.4833	2	0	0	0	0	0	0	0	0	0	0
1110	18.5	2	0	0	0	0	0	0	0	0	0	0
1111	18.5167	2	0	0	0	0	0	0	0	0	0	0
1112	18.5333	2	0	0	0	0	0	0	0	0	0	0
1113	18.55	2	0	0	0	0	0	0	0	0	0	0
1114	18.5667	2	0	0	0	0	0	0	0	0	0	0
1115	18.5833	2	0	0	0	0	0	0	0	0	0	0
1116	18.6	2	0	0	0	0	0	0	0	0	0	0
1117	18.6167	2	0	0	0	0	0	0	0	0	0	0
1118	18.6333	2	0	0	0	0	0	0	0	0	0	0
1119	18.65	2	0	0	0	0	0	0	0	0	0	0
1120	18.6667	2	0	0	0	0	0	0	0	0	0	0
1121	18.6833	2	0	0	0	0	0	0	0	0	0	0
1122	18.7	2	0	0	0	0	0	0	0	0	0	0
1123	18.7167	2	0	0	0	0	0	0	0	0	0	0
1124	18.7333	2	0	0	0	0	0	0	0	0	0	0
1125	18.75	2	0	0	0	0	0	0	0	0	0	0
1126	18.7667	2	0	0	0	0	0	0	0	0	0	0
1127	18.7833	2	0	0	0	0	0	0	0	0	0	0
1128	18.8	2	0	0	0	0	0	0	0	0	0	0
1129	18.8167	2	0	0	0	0	0	0	0	0	0	0
1130	18.8333	2	0	0	0	0	0	0	0	0	0	0
1131	18.85	2	0	0	0	0	0	0	0	0	0	0
1132	18.8667	2	0	0	0	0	0	0	0	0	0	0
1133	18.8833	2	0	0	0	0	0	0	0	0	0	0
1134	18.9	2	0	0	0	0	0	0	0	0	0	0
1135	18.9167	2	0	0	0	0	0	0	0	0	0	0
1136	18.9333	2	0	0	0	0	0	0	0	0	0	0
1137	18.95	2	0	0	0	0	0	0	0	0	0	0
1138	18.9667	2	0	0	0	0	0	0	0	0	0	0
1139	18.9833	2	0	0	0	0	0	0	0	0	0	0
1140	19	2	0	0	0	0	0	0	0	0	0	0
1141	19.0167	2	0	0	0	0	0	0	0	0	0	0
1142	19.0333	2	0	0	0	0	0	0	0	0	0	0
1143	19.05	2	0	0	0	0	0	0	0	0	0	0
1144	19.0667	2	0	0	0	0	0	0	0	0	0	0
1145	19.0833	2	0	0	0	0	0	0	0	0	0	0
1146	19.1	2	0	0	0	0	0	0	0	0	0	0
1147	19.1167	2	0	0	0	0	0	0	0	0	0	0
1148	19.1333	2	1	0	0	0	0	0	0	0	0	0
1149	19.15	2	1	0	0	0	0	0	0	0	0	0
1150	19.1667	2	1	0	0	0	0	0	0	0	0	0
1151	19.1833	2	0	0	0	0	0	0	0	0	0	0
1152	19.2	2	1	0	0	0	0	0	0	0	0	0
1153	19.2167	2	1	0	0	0	0	0	0	0	0	0
1154	19.2333	2	1	0	0	0	0	0	0	0	0	0
1155	19.25	2	1	0	0	0	0	0	0	0	0	0
1156	19.2667	2	1	0	0	0	0	0	0	0	0	0
1157	19.2833	2	1	0	0	0	0	0	0	0	0	0
1158	19.3	2	1	0	0	0	0	0	0	0	0	0
1159	19.3167	2	1	0	0	0	0	0	0	0	0	0
1160	19.3333	2	1	0	0	0	0	0	0	0	0	0
1161	19.35	2	1	0	0	0	0	0	0	0	0	0
1162	19.3667	2	1	0	0	0	0	0	0	0	0	0
1163	19.3833	2	1	0	0	0	0	0	0	0	0	0
1164	19.4	2	1	0	0	0	0	0	0	0	0	0
1165	19.4167	2	1	0	0	0	0	0	0	0	0	0
1166	19.4333	2	1	0	0	0	0	0	0	0	0	0
1167	19.45	2	1	0	0	0	0	0	0	0	0	0
1168	19.4667	2	1	0	0	0	0	0	0	0	0	0
1169	19.4833	2	1	0	0	0	0	0	0	0	0	0
1170	19.5	2	1	0	0	0	0	0	0	0	0	0
1171	19.5167	2	1	0	0	0	0	0	0	0	0	0
1172	19.5333	2	1	0	0	0	0	0	0	0	0	0
1173	19.55	2	1	0	0	0	0	0	0	0	0	0
1174	19.5667	2	1	0	0	0	0	0	0	0	0	0
1175	19.5833	2	1	0	0	0	0	0	0	0	0	0
1176	19.6	2	1	0	0	0	0	0	0	0	0	0
1177	19.6167	2	1	0	0	0	0	0	0	0	0	0
1178	19.6333	2	1	0	0	0	0	0	0	0	0	0
1179	19.65	2	1	0	0	0	0	0	0	0	0	0
1180	19.6667	2	1	0	0	0	0	0	0	0	0	0
1181	19.6833	2	1	0	0	0	0	0	0	0	0	0
1182	19.7	2	0	0	0	0	0	0	0	0	0	0
1183	19.7167	2	0	0	0	0	0	0	0	0	0	0
1184	19.7333	2	0	0	0	0	0	0	0	0	0	0
1185	19.75	2	0	0	0	0	0	0	0	0	0	0
1186	19.7667	2	0	0	0	0	0	0	0	0	0	0
1187	19.7833	2	0	0	0	0	0	0	0	0	0	0
1188	19.8	2	0	0	0	0	0	0	0	0	0	0
1189	19.8167	2	0	0	0	0	0	0	0	0	0	0
1190	19.8333	2	0	0	0	0	0	0	0	0	0	0
1191	19.85	2	0	1	0	0	0	0	0	0	0	0
1192	19.8667	2	0	1	0	0	0	0	0	0	0	0
1193	19.8833	2	0	1	0	0	0	0	0	0	0	0
1194	19.9	2	0	1	0	0	0	0	0	0	0	0
1195	19.9167	2	0	0	0	0	0	0	0	0	0	0
1196	19.9333	2	0	0	0	0	0	0	0	0	0	0
1197	19.95	2	0	0	0	0	0	0	0	0	0	0
1198	19.9667	2	0	0	0	0	0	0	0	0	0	0
1199	19.9833	2	0	0	0	0	0	0	0	0	0	0
1200	20	2	0	0	0	0	0	0	0	0	0	0
1201	20.0167	2	0	0	0	0	0	0	0	0	0	0
1202	20.0333	2	0	0	0	0	0	0	0	0	0	0
1203	20.05	2	0	0	0	0	0	0	0	0	0	0
1204	20.0667	2	0	0	0	0	0	0	0	0	0	0
1205	20.0833	2	0	0	0	0	0	0	0	0	0	0
1206	20.1	2	0	0	0	0	0	0	0	0	0	0
1207	20.1167	2	0	0	0	0	0	0	0	0	0	0
1208	20.1333	2	0	0	0	0	0	0	0	0	0	0
1209	20.15	2	0	0	0	0	0	0	0	0	0	0
1210	20.1667	2	0	0	0	0	0	0	0	0	0	0
1211	20.1833	2	0	0	0	0	0	0	0	0	0	0
1212	20.2	2	0	0	0	0	0	0	0	0	0	0
1213	20.2167	2	0	0	0	0	0	0	0	0	0	0
1214	20.2333	2	0	0	0	0	0	0	0	0	0	0
1215	20.25	2	0	0	0	0	0	0	0	0	0	0
1216	20.2667	2	0	0	0	0	0	0	0	0	0	0
1217	20.2833	2	0	0	0	0	0	0	0	0	0	0
1218	20.3	2	0	0	0	0	0	0	0	0	0	0
1219	20.3167	2	0	0	0	0	0	0	0	0	0	0
1220	20.3333	2	0	0	0	0	0	0	0	0	0	0
1221	20.35	2	0	0	0	0	0	0	0	0	0	0
1222	20.3667	2	0	0	0	0	0	0	0	0	0	0
1223	20.3833	2	0	0	0	0	0	0	0	0	0	0
1224	20.4	2	0	0	0	0	0	0	0	0	0	0
1225	20.4167	2	0	0	0	0	0	0	0	0	0	0
1226	20.4333	2	0	0	0	0	0	0	0	0	0	0
1227	20.45	2	0	0	0	0	0	0	0	0	0	0
1228	20.4667	2	0	0	0	0	0	0	0	0	0	0
1229	20.4833	2	0	0	0	0	0	0	0	0	0	0
1230	20.5	2	0	0	0	0	0	0	0	0	0	0
1231	20.5167	2	0	0	0	0	0	0	0	0	0	0
1232	20.5333	2	0	0	0	0	0	0	0	0	0	0
1233	20.55	2	0	0	0	0	0	0	0	0	0	0
1234	20.5667	2	0	0	0	0	0	0	0	0	0	0
1235	20.5833	2	0	0	0	0	0	0	0	0	0	0
1236	20.6	2	0	0	0	0	0	0	0	0	0	0
1237	20.6167	2	0	0	0	0	0	0	0	0	0	0
1238	20.6333	2	0	0	0	0	0	0	0	0	0	0
1239	20.65	2	0	0	0	0	0	0	0	0	0	0
1240	20.6667	2	0	0	0	0	0	0	0	0	0	0
1241	20.6833	2	0	0	0	0	0	0	0	0	0	0
1242	20.7	2	0	0	0	0	0	0	0	0	0	0
1243	20.7167	2	0	0	0	0	0	0	0	0	0	0
1244	20.7333	2	0	0	0	0	0	0	0	0	0	0
1245	20.75	2	0	0	0	0	0	0	0	0	0	0
1246	20.7667	2	0	0	0	0	0	0	0	0	0	0
1247	20.7833	2	0	0	0	0	0	0	0	0	0	0
1248	20.8	2	0	0	0	0	0	0	0	0	0	0
1249	20.8167	2	0	0	0	0	0	0	0	0	0	0
1250	20.8333	2	0	0	0	0	0	0	0	0	0	0
1251	20.85	2	0	0	0	0	0	0	0	0	0	0
1252	20.8667	2	0	0	0	0	0	0	0	0	0	0
1253	20.8833	2	0	0	0	0	0	0	0	0	0	0
1254	20.9	2	0	0	0	0	0	0	0	0	0	0
1255	20.9167	2	0	0	0	0	0	0	0	0	0	0
1256	20.9333	2	0	0	0	0	0	0	0	0	0	0
1257	20.95	2	0	0	0	0	0	0	0	0	0	0
1258	20.9667	2	0	0	0	0	0	0	0	0	0	0
1259	20.9833	2	0	1	0	0	0	0	0	0	0	0
1260	21	2	0	1	0	0	0	0	0	0	0	0
1261	21.0167	2	0	1	0	0	0	0	0	0	0	0
1262	21.0333	2	0	0	0	0	0	0	0	0	0	0
1263	21.05	2	0	0	0	0	0	0	0	0	0	0
1264	21.0667	2	0	0	0	0	0	0	0	0	0	0
1265	21.0833	2	0	0	0	0	0	0	0	0	0	0
1266	21.1	2	0	0	0	0	0	0	0	0	0	0
1267	21.1167	2	0	0	0	0	0	0	0	0	0	0
1268	21.1333	2	0	0	0	0	0	0	0	0	0	0
1269	21.15	2	0	0	0	0	0	0	0	0	0	0
1270	21.1667	2	0	0	0	0	0	0	0	0	0	0
1271	21.1833	2	0	0	0	0	0	0	0	0	0	0
1272	21.2	2	0	0	0	0	0	0	0	0	0	0
1273	21.2167	2	0	0	0	0	0	0	0	0	0	0
1274	21.2333	2	0	0	0	0	0	0	0	0	0	0
1275	21.25	2	0	0	0	0	0	0	0	0	0	0
1276	21.2667	2	0	0	0	0	0	0	0	0	0	0
1277	21.2833	2	0	0	0	0	0	0	0	0	0	0
1278	21.3	2	0	0	0	0	0	0	0	0	0	0
1279	21.3167	2	0	0	0	0	0	0	0	0	0	0
1280	21.3333	2	0	0	0	0	0	0	0	0	0	0
1281	21.35	2	0	0	0	0	0	0	0	0	0	0
1282	21.3667	2	0	0	0	0	0	0	0	0	0	0
1283	21.3833	2	0	0	0	0	0	0	0	0	0	0
1284	21.4	2	0	0	0	0	0	0	0	0	0	0
1285	21.4167	2	0	0	0	0	0	0	0	0	0	0
1286	21.4333	2	0	0	0	0	0	0	0	0	0	0
1287	21.45	2	0	0	0	0	0	0	0	0	0	0
1288	21.4667	2	0	0	0	0	0	0	1	0	0	0
1289	21.4833	2	0	0	0	0	0	0	1	0	0	0
1290	21.5	2	0	0	0	0	0	0	1	0	0	0
1291	21.5167	2	0	0	0	0	0	0	1	0	0	0
1292	21.5333	2	0	0	0	0	0	0	1	0	0	0
1293	21.55	2	0	0	0	0	0	0	1	0	0	0
1294	21.5667	2	0	0	0	0	0	0	1	0	0	0
1295	21.5833	2	0	0	0	0	0	0	1	0	0	0
1296	21.6	2	0	0	0	0	0	0	1	0	0	0
1297	21.6167	2	0	0	0	0	0	0	1	0	0	0
1298	21.6333	2	0	0	0	0	0	0	0	0	0	0
1299	21.65	2	0	0	0	0	0	0	0	0	0	0
1300	21.6667	2	0	0	0	0	0	0	0	0	0	0
1301	21.6833	2	0	0	0	0	0	0	0	0	0	0
1302	21.7	2	0	0	0	0	0	0	0	0	0	0
1303	21.7167	2	0	0	0	0	0	0	0	0	0	0
1304	21.7333	2	0	0	0	0	0	0	0	0	0	0
1305	21.75	2	0	0	0	0	0	0	0	0	0	0
1306	21.7667	2	0	0	0	0	0	0	0	0	0	0
1307	21.7833	2	0	0	0	0	0	0	0	0	0	0
1308	21.8	2	0	0	0	0	0	0	0	0	0	0
1309	21.8167	2	0	0	0	0	0	0	0	0	0	0
1310	21.8333	2	0	0	0	0	0	0	0	0	0	0
1311	21.85	2	0	0	0	0	0	0	0	0	0	0
1312	21.8667	2	0	0	0	0	0	0	0	0	0	0
1313	21.8833	2	0	0	0	0	0	0	0	0	0	0
1314	21.9	2	0	0	0	0	0	0	0	0	0	0
1315	21.9167	2	0	0	0	0	0	0	0	0	0	0
1316	21.9333	2	0	0	0	0	0	0	0	0	0	0
1317	21.95	2	0	0	0	0	0	0	0	0	0	0
1318	21.9667	2	0	0	0	0	0	0	0	0	0	0
1319	21.9833	2	0	0	0	0	0	0	0	0	0	0
1320	22	2	0	0	0	0	0	0	0	0	0	0
1321	22.0167	2	0	0	0	0	0	0	0	0	0	0
1322	22.0333	2	1	0	0	0	0	0	0	0	0	0
1323	22.05	2	1	0	0	0	0	0	0	0	0	0
1324	22.0667	2	1	0	0	0	0	0	0	0	0	0
1325	22.0833	2	1	0	0	0	0	0	0	0	0	0
1326	22.1	2	1	0	0	0	0	0	0	0	0	0
1327	22.1167	2	1	0	0	0	0	0	0	0	0	0
1328	22.1333	2	1	0	0	0	0	0	0	0	0	0
1329	22.15	2	1	0	0	0	0	0	0	0	0	0
1330	22.1667	2	1	0	0	0	0	0	0	0	0	0
1331	22.1833	2	1	0	0	0	0	0	0	0	0	0
1332	22.2	2	1	0	0	0	0	0	0	0	0	0
1333	22.2167	2	1	0	0	0	0	0	0	0	0	0
1334	22.2333	2	1	0	0	0	0	0	0	0	0	0
1335	22.25	2	1	0	0	0	0	0	0	0	0	0
1336	22.2667	2	1	0	0	0	0	0	0	0	0	0
1337	22.2833	2	1	0	0	0	0	0	0	0	0	0
1338	22.3	2	1	0	0	0	0	0	0	0	0	0
1339	22.3167	2	1	0	0	0	0	0	0	0	0	0
1340	22.3333	2	1	0	0	0	0	0	0	0	0	0
1341	22.35	2	1	0	0	0	0	0	0	0	0	0
1342	22.3667	2	1	0	0	0	0	0	0	0	0	0
1343	22.3833	2	1	0	0	0	0	0	0	0	0	0
1344	22.4	2	1	0	0	0	0	0	0	0	0	0
1345	22.4167	2	1	0	0	0	0	0	0	0	0	0
1346	22.4333	2	1	0	0	0	0	0	0	0	0	0
1347	22.45	2	1	0	0	0	0	0	0	0	0	0
1348	22.4667	2	1	0	0	0	0	0	0	0	0	0
1349	22.4833	2	1	0	0	0	0	0	0	0	0	0
1350	22.5	2	1	0	0	0	0	0	0	0	0	0
1351	22.5167	2	1	0	0	0	0	0	0	0	0	0
1352	22.5333	2	1	0	0	0	0	0	0	0	0	0
1353	22.55	2	1	0	0	0	0	0	0	0	0	0
1354	22.5667	2	1	0	0	0	0	0	0	0	0	0
1355	22.5833	2	1	0	0	0	0	0	0	0	0	0
1356	22.6	2	1	0	0	0	0	0	0	0	0	0
1357	22.6167	2	1	0	0	0	0	0	0	0	0	0
1358	22.6333	2	1	0	0	0	0	0	0	0	0	0
1359	22.65	2	1	0	0	0	0	0	0	0	0	0
1360	22.6667	2	1	0	0	0	0	0	0	0	0	0
1361	22.6833	2	1	0	0	0	0	0	0	0	0	0
1362	22.7	2	1	0	0	0	0	0	0	0	0	0
1363	22.7167	2	1	0	0	0	0	0	0	0	0	0
1364	22.7333	2	1	0	0	0	0	0	0	0	0	0
1365	22.75	2	1	0	0	0	0	0	0	0	0	0
1366	22.7667	2	1	0	0	0	0	0	0	0	0	0
1367	22.7833	2	1	0	0	0	0	0	0	0	0	0
1368	22.8	2	1	0	0	0	0	0	0	0	0	0
1369	22.8167	2	1	0	0	0	0	0	0	0	0	0
1370	22.8333	2	1	0	0	0	0	0	0	0	0	0
1371	22.85	2	1	0	0	0	0	0	0	0	0	0
1372	22.8667	2	1	0	0	0	0	0	0	0	0	0
1373	22.8833	2	1	0	0	0	0	0	0	0	0	0
1374	22.9	2	1	0	0	0	0	0	0	0	0	0
1375	22.9167	2	1	0	0	0	0	0	0	0	0	0
1376	22.9333	2	1	0	0	0	0	0	0	0	0	0
1377	22.95	2	1	0	0	0	0	0	0	0	0	0
1378	22.9667	2	1	0	0	0	0	0	0	0	0	0
1379	22.9833	2	1	0	0	0	0	0	0	0	0	0
1380	23	2	1	0	0	0	0	0	0	0	0	0
1381	23.0167	2	1	0	0	0	0	0	0	0	0	0
1382	23.0333	2	1	0	0	0	0	0	0	0	0	0
1383	23.05	2	1	0	0	0	0	0	0	0	0	0
1384	23.0667	2	1	0	0	0	0	0	0	0	0	0
1385	23.0833	2	1	0	0	0	0	0	0	0	0	0
1386	23.1	2	1	0	0	0	0	0	0	0	0	0
1387	23.1167	2	1	0	0	0	0	0	0	0	0	0
1388	23.1333	2	1	0	0	0	0	0	0	0	0	0
1389	23.15	2	1	0	0	0	0	0	0	0	0	0
1390	23.1667	2	1	0	0	0	0	0	0	0	0	0
1391	23.1833	2	1	0	0	0	0	0	0	0	0	0
1392	23.2	2	1	0	0	0	0	0	0	0	0	0
1393	23.2167	2	1	0	0	0	0	0	0	0	0	0
1394	23.2333	2	1	0	0	0	0	0	0	0	0	0
1395	23.25	2	1	0	0	0	0	0	0	0	0	0
1396	23.2667	2	1	0	0	0	0	0	0	0	0	0
1397	23.2833	2	1	0	0	0	0	0	0	0	0	0
1398	23.3	2	1	0	0	0	0	0	0	0	0	0
1399	23.3167	2	1	0	0	0	0	0	0	0	0	0
1400	23.3333	2	1	0	0	0	0	0	0	0	0	0
1401	23.35	2	1	0	0	0	0	0	0	0	0	0
1402	23.3667	2	1	0	0	0	0	0	0	0	0	0
1403	23.3833	2	1	0	0	0	0	0	0	0	0	0
1404	23.4	2	1	0	0	0	0	0	0	0	0	0
1405	23.4167	2	1	0	0	0	0	0	0	0	0	0
1406	23.4333	2	1	0	0	0	0	0	0	0	0	0
1407	23.45	2	1	0	0	0	0	0	0	0	0	0
1408	23.4667	2	1	0	0	0	0	0	0	0	0	0
1409	23.4833	2	1	0	0	0	0	0	0	0	0	0
1410	23.5	2	1	0	0	0	0	0	0	0	0	0
1411	23.5167	2	1	0	0	0	0	0	0	0	0	0
1412	23.5333	2	1	0	0	0	0	0	0	0	0	0
1413	23.55	2	1	0	0	0	0	0	0	0	0	0
1414	23.5667	2	1	0	0	0	0	0	0	0	0	0
1415	23.5833	2	1	0	0	0	0	0	0	0	0	0
1416	23.6	2	1	0	0	0	0	0	0	0	0	0
1417	23.6167	2	1	0	0	0	0	0	2	0	0	0
1418	23.6333	2	1	0	0	0	0	0	2	0	0	0
1419	23.65	2	1	0	0	0	0	0	2	0	0	0
1420	23.6667	2	1	0	0	0	0	0	2	0	0	0
1421	23.6833	2	1	0	0	0	0	0	2	0	0	0
1422	23.7	2	1	0	0	0	0	0	2	0	0	0
1423	23.7167	2	1	0	0	0	0	0	2	0	0	0
1424	23.7333	2	1	0	0	0	0	0	2	0	0	0
1425	23.75	2	1	0	0	0	0	0	2	0	0	0
1426	23.7667	2	1	0	0	0	0	0	2	0	0	0
1427	23.7833	2	1	0	0	0	0	0	2	0	0	0
1428	23.8	2	1	0	0	0	0	0	2	0	0	0
1429	23.8167	2	1	0	0	0	0	0	2	0	0	0
1430	23.8333	2	1	0	0	0	0	0	2	0	0	0
1431	23.85	2	1	0	0	0	0	0	2	0	0	0
1432	23.8667	2	1	0	0	0	0	0	2	0	0	0
1433	23.8833	2	1	0	0	0	0	0	2	0	0	0
1434	23.9	2	1	0	0	0	0	0	2	0	0	0
1435	23.9167	2	1	0	0	0	0	0	2	0	0	0
1436	23.9333	2	1	0	0	0	0	0	2	0	0	0
1437	23.95	2	1	0	0	0	0	0	2	0	0	0
1438	23.9667	2	1	0	0	0	0	0	2	0	0	0
1439	23.9833	2	1	0	0	0	0	0	2	0	0	0
1440	24	2	1	0	0	0	0	0	2	0	0	0
1441	24.0167	54	1	0	0	0	0	0	2	0	0	0
1442	24.0333	54	1	0	0	0	0	0	2	0	0	0
1443	24.05	54	1	0	0	0	0	0	2	0	0	0
1444	24.0667	54	1	0	0	0	0	0	2	0	0	0
1445	24.0833	54	1	0	0	0	0	0	2	0	0	0
1446	24.1	54	1	0	0	0	0	0	2	0	0	0
1447	24.1167	54	1	0	0	0	0	0	2	0	0	0
1448	24.1333	54	1	0	0	0	0	0	2	0	0	0
1449	24.15	54	1	0	0	0	0	0	2	0	0	0
1450	24.1667	54	1	0	0	0	0	0	2	0	0	0
1451	24.1833	54	1	0	0	0	0	0	2	0	0	0
1452	24.2	54	1	0	0	0	0	0	2	0	0	0
1453	24.2167	54	1	0	0	0	0	0	2	0	0	0
1454	24.2333	54	1	0	0	0	0	0	2	0	0	0
1455	24.25	54	1	0	0	0	0	0	2	0	0	0
1456	24.2667	54	1	0	0	0	0	0	2	0	0	0
1457	24.2833	54	1	0	0	0	0	0	2	0	0	0
1458	24.3	54	1	0	0	0	0	0	2	0	0	0
1459	24.3167	54	1	0	0	0	0	0	2	0	0	0
1460	24.3333	54	1	0	0	0	0	0	2	0	0	0
1461	24.35	54	1	0	0	0	0	0	2	0	0	0
1462	24.3667	54	1	0	0	0	0	0	2	0	0	0
1463	24.3833	54	1	0	0	0	0	0	2	0	0	0
1464	24.4	54	1	0	0	0	0	0	2	0	0	0
1465	24.4167	54	1	0	0	0	0	0	2	0	0	0
1466	24.4333	54	1	0	0	0	0	0	2	0	0	0
1467	24.45	54	1	0	0	0	0	0	2	0	0	0
1468	24.4667	54	1	0	0	0	0	0	2	0	0	0
1469	24.4833	54	1	0	0	0	0	0	2	0	0	0
1470	24.5	54	1	0	0	0	0	0	2	0	0	0
1471	24.5167	54	1	0	0	0	0	0	2	0	0	0
1472	24.5333	54	1	0	0	0	0	0	2	0	0	0
1473	24.55	54	1	0	0	0	0	0	2	0	0	0
1474	24.5667	54	1	0	0	0	0	0	2	0	0	0
1475	24.5833	54	1	0	0	0	0	0	2	0	0	0
1476	24.6	54	1	0	0	0	0	0	2	0	0	0
1477	24.6167	54	1	0	0	0	0	0	2	0	0	0
1478	24.6333	54	1	0	0	0	0	0	2	0	0	0
1479	24.65	54	1	0	0	0	0	0	2	0	0	0
1480	24.6667	54	1	0	0	0	0	0	2	0	0	0
1481	24.6833	54	1	0	0	0	0	0	2	0	0	0
1482	24.7	54	1	0	0	0	0	0	2	0	0	0
1483	24.7167	54	1	0	0	0	0	0	2	0	0	0
1484	24.7333	54	1	0	0	0	0	0	2	0	0	0
1485	24.75	54	1	0	0	0	0	0	2	0	0	0
1486	24.7667	54	1	0	0	0	0	0	2	0	0	0
1487	24.7833	54	1	0	0	0	0	0	2	0	0	0
1488	24.8	54	1	0	0	0	0	0	2	0	0	0
1489	24.8167	54	1	0	0	0	0	0	2	0	0	0
1490	24.8333	54	1	0	0	0	0	0	2	0	0	0
1491	24.85	54	1	0	0	0	0	0	2	0	0	0
1492	24.8667	54	1	0	0	0	0	0	2	0	0	0
1493	24.8833	54	1	0	0	0	0	0	2	0	0	0
1494	24.9	54	1	0	0	0	0	0	2	0	0	0
1495	24.9167	54	1	0	0	0	0	0	2	0	0	0
1496	24.9333	54	1	0	0	0	0	0	2	0	0	0
1497	24.95	54	1	0	0	0	0	0	2	0	0	0
1498	24.9667	54	1	0	0	0	0	0	2	0	0	0
1499	24.9833	54	1	0	0	0	0	0	2	0	0	0
1500	25	54	1	0	0	0	0	0	2	0	0	0
1501	25.0167	54	1	0	0	0	0	0	2	0	0	0
1502	25.0333	54	1	0	0	0	0	0	2	0	0	0
1503	25.05	54	1	0	0	0	0	0	2	0	0	0
1504	25.0667	54	1	0	0	0	0	0	0	0	0	0
1505	25.0833	54	1	0	0	0	0	0	0	0	0	0
1506	25.1	54	1	0	0	0	0	0	0	0	0	0
1507	25.1167	54	1	0	0	0	0	0	0	0	0	0
1508	25.1333	54	1	0	0	0	0	0	0	0	0	0
1509	25.15	54	1	0	0	0	0	0	0	0	0	0
1510	25.1667	54	1	0	0	0	0	0	0	0	0	0
1511	25.1833	54	1	0	0	0	0	0	0	0	0	0
1512	25.2	54	1	0	0	0	0	0	0	0	0	0
1513	25.2167	54	1	0	0	0	0	0	0	0	0	0
1514	25.2333	54	1	0	0	0	0	0	0	0	0	0
1515	25.25	54	1	0	0	0	0	0	0	0	0	0
1516	25.2667	54	1	0	0	0	0	0	0	0	0	0
1517	25.2833	54	1	0	0	0	0	0	0	0	0	0
1518	25.3	54	1	0	0	0	0	0	0	0	0	0
1519	25.3167	54	1	0	0	0	0	0	0	0	0	0
1520	25.3333	54	1	0	1	0	0	0	0	0	0	0
1521	25.35	54	1	0	1	0	0	0	0	0	0	0
1522	25.3667	54	1	0	1	0	0	0	0	0	0	0
1523	25.3833	54	1	0	1	0	0	0	0	0	0	0
1524	25.4	54	1	0	1	0	0	0	0	0	0	0
1525	25.4167	54	1	0	1	0	0	0	0	0	0	0
1526	25.4333	54	1	0	1	0	0	0	0	0	0	0
1527	25.45	54	1	0	1	0	0	0	0	0	0	0
1528	25.4667	54	1	0	1	0	0	0	0	0	0	0
1529	25.4833	54	1	0	1	0	0	0	0	0	0	0
1530	25.5	54	1	0	1	0	0	0	0	0	0	0
1531	25.5167	54	1	0	1	0	0	0	0	0	0	0
1532	25.5333	54	1	0	1	0	0	0	0	0	0	0
1533	25.55	54	1	0	1	0	0	0	0	0	0	0
1534	25.5667	54	1	0	1	0	0	0	0	0	0	0
1535	25.5833	54	1	0	1	0	0	0	0	0	0	0
1536	25.6	54	1	0	1	0	0	0	0	0	0	0
1537	25.6167	54	1	0	1	0	0	0	0	0	0	0
1538	25.6333	54	1	0	0	0	0	0	0	0	0	0
1539	25.65	54	1	0	0	0	0	0	0	0	0	0
1540	25.6667	54	1	0	0	0	0	0	0	0	0	0
1541	25.6833	54	1	0	0	0	0	0	0	0	0	0
1542	25.7	54	1	0	0	0	0	0	0	0	0	0
1543	25.7167	54	1	0	0	0	0	0	0	0	0	0
1544	25.7333	54	1	0	0	0	0	0	0	0	0	0
1545	25.75	54	1	0	0	0	0	0	0	0	0	0
1546	25.7667	54	1	0	0	0	0	0	0	0	0	0
1547	25.7833	54	1	0	0	0	0	0	0	0	0	0
1548	25.8	54	1	0	0	0	0	0	0	0	0	0
1549	25.8167	54	1	0	0	0	0	0	0	0	0	0
1550	25.8333	54	1	0	0	0	0	0	0	0	0	0
1551	25.85	54	1	0	0	0	0	0	0	0	0	0
1552	25.8667	54	1	0	0	0	0	0	0	0	0	0
1553	25.8833	54	1	0	0	0	0	0	0	0	0	0
1554	25.9	54	1	0	0	0	0	0	0	0	0	0
1555	25.9167	54	1	0	0	0	0	0	0	0	0	0
1556	25.9333	54	2	0	0	0	0	0	0	0	0	0
1557	25.95	54	2	0	0	0	0	0	0	0	0	0
1558	25.9667	54	2	0	0	0	0	0	0	0	0	0
1559	25.9833	54	2	0	0	0	0	0	0	0	0	0
1560	26	54	2	0	0	0	0	0	0	0	0	0
1561	26.0167	54	2	0	0	0	0	0	0	0	0	0
1562	26.0333	54	2	0	0	0	0	0	0	0	0	0
1563	26.05	54	4	0	0	0	0	0	0	0	0	0
1564	26.0667	54	4	0	0	0	0	0	0	0	0	0
1565	26.0833	54	4	0	0	0	0	0	0	0	0	0
1566	26.1	54	4	0	0	0	0	0	0	0	0	0
1567	26.1167	54	4	0	0	0	0	0	0	0	0	0
1568	26.1333	54	4	0	0	0	0	0	0	0	0	0
1569	26.15	54	3	0	0	0	0	0	0	0	0	0
1570	26.1667	54	3	0	0	0	0	0	0	0	0	0
1571	26.1833	54	3	0	0	0	0	0	0	0	0	0
1572	26.2	54	3	0	0	0	0	0	0	0	0	0
1573	26.2167	54	3	0	0	0	0	0	0	0	0	0
1574	26.2333	54	3	0	0	0	0	0	0	0	0	0
1575	26.25	54	3	0	0	0	0	0	0	0	0	0
1576	26.2667	54	3	0	0	0	0	0	0	0	0	0
1577	26.2833	54	3	0	0	0	0	0	0	0	0	0
1578	26.3	54	3	0	0	0	0	0	0	0	0	0
1579	26.3167	54	3	0	0	0	0	0	0	0	0	0
1580	26.3333	54	3	0	0	0	0	0	0	0	0	0
1581	26.35	54	2	0	0	0	0	0	0	0	0	0
1582	26.3667	54	2	0	0	0	0	0	0	0	0	0
1583	26.3833	54	2	0	0	0	0	0	0	0	0	0
1584	26.4	54	2	0	0	0	0	0	0	0	0	0
1585	26.4167	54	2	0	0	0	0	0	0	0	0	0
1586	26.4333	54	2	0	0	0	0	0	0	0	0	0
1587	26.45	54	2	0	0	0	0	0	0	0	0	0
1588	26.4667	54	2	0	0	0	0	0	0	0	0	0
1589	26.4833	54	2	0	0	0	0	0	0	0	0	0
1590	26.5	54	2	0	0	0	0	0	0	0	0	0
1591	26.5167	54	2	0	0	0	0	0	0	0	0	0
1592	26.5333	54	2	0	0	0	0	0	0	0	0	0
1593	26.55	54	2	0	0	0	0	0	0	0	0	0
[truncated: 2,007 more rows]

## Sheet: GP32_8
Seconds	Minutes	Sillago ciliata	Omobranchus anolius	Acanthopagrus australis	Girella tricuspidata	Girella	Ambassis	Cryptocentroides gobioides	Mugil cephalus	Tylosurus gavialoides	Favonigobius exquisitus
[truncated: 3,600 more rows]

[truncated: 2 more sheets: GP36_9, GP39_10]
